# Supplementary material for: Polymeric CuX coordination compounds assembled from acetylenic thioether ligands RSCH2CCCH2R (R = C6H11, t-Bu): effect of the RS-group, halide and stoichiometry on the network architecture and the luminescence properties
Source: Royal Society of Chemistry journal article supplement (doi:10.1039/d4ce00173g), 2024-01-01
Supplement: d4ce00173g1.pdf [file d4ce00173g1.pdf]

**Polymeric CuX coordination compounds assembled by acetylenic thioether ligands  
RSCH<sub>2</sub>C≡CCH<sub>2</sub>R (R = C<sub>6</sub>H<sub>11</sub>, *t*-Bu): Effect of the RS-group, halide and stoichiometry  
on the network architecture and the luminescence properties**

Michael Knorr,<sup>\*a</sup> Lydie Viau,<sup>\*a</sup> Lena Knauer,<sup>b</sup> Carsten Strohmann,<sup>b</sup> Yoann Rousselin,<sup>c</sup> and

Marek M. Kubicki<sup>c</sup>

---

Table of contents

---

|                                                                                                                                                                                                                                                                             |    |
|-----------------------------------------------------------------------------------------------------------------------------------------------------------------------------------------------------------------------------------------------------------------------------|----|
| <b>Figure S1.</b> View of the [ac] plane down the <i>b</i> axis of $[\{\text{Cu}(\mu_2\text{-I})_2\text{Cu}\}(\mu\text{-L1})_2]_n$ ( <b>CP2</b> ) and co-crystallized discrete molecules of $[\{\text{Cu}(\mu_2\text{-I})_2\text{Cu}\}(\mu\text{-L1})_2]$ <b>D1</b> . ..... | 3  |
| <b>Figure S2.</b> View of the [ac] plane down the <i>b</i> axis of $[\{\text{Cu}(\mu_2\text{-Cl})_2\text{Cu}\}(\mu\text{-L1})_2]_n$ ( <b>CP4</b> ). .....                                                                                                                   | 4  |
| <b>Figure S3.</b> View of the [ac] plane down the <i>b</i> axis of $[\{\text{Cu}(\mu_2\text{-Br})_2\text{Cu}\}(\mu\text{-L2})_2]_n$ ( <b>CP7</b> ). .....                                                                                                                   | 4  |
| <b>Figure S4.</b> View of the [ac] plane down the <i>b</i> axis of $[\{\text{Cu}(\mu_2\text{-Cl})_2\text{Cu}\}(\mu\text{-L2})_2]_n$ ( <b>CP8</b> ). .....                                                                                                                   | 5  |
| <b>Figure S5.</b> View of the [ac] plane down the <i>b</i> axis of $[\{\text{Cu}(\mu_2\text{-Br})_2\text{Cu}\}(\text{CH}_3\text{CN})(\mu\text{-L3})_2]_n$ <b>CP9</b> . .....                                                                                                | 5  |
| <b>Figure S6.</b> View of three layers of the 2D $[\{\text{Cu}(\mu_2\text{-Br})_2\text{Cu}\}(\mu\text{-L2})(\mu\text{-L3})]_n$ ( <b>CP10</b> ). .....                                                                                                                       | 6  |
| <b>Figure S7.</b> View of four layers of the 2D $[\{\text{Cu}(\mu_2\text{-Cl})_2\text{Cu}\}(\mu\text{-L2})(\mu\text{-L3})]_n$ ( <b>CP11</b> ). .....                                                                                                                        | 6  |
| <b>Figure S8:</b> Experimental and simulated PXRD of <b>CP1</b> . .....                                                                                                                                                                                                     | 12 |
| <b>Figure S9:</b> Experimental and simulated PXRD of <b>CP2-D1</b> .....                                                                                                                                                                                                    | 12 |
| <b>Figure S10:</b> Experimental and simulated PXRD of <b>CP3-D2</b> .....                                                                                                                                                                                                   | 13 |
| <b>Figure S11:</b> Experimental and simulated PXRD of <b>CP4</b> . .....                                                                                                                                                                                                    | 13 |
| <b>Figure S12:</b> Experimental and simulated PXRD of <b>CP5</b> . .....                                                                                                                                                                                                    | 14 |
| <b>Figure S13:</b> Experimental and simulated PXRD of <b>CP6</b> . .....                                                                                                                                                                                                    | 14 |
| <b>Figure S14:</b> Experimental and simulated PXRD of <b>CP7</b> . .....                                                                                                                                                                                                    | 15 |
| <b>Figure S15:</b> Experimental and simulated PXRD of <b>CP8</b> . .....                                                                                                                                                                                                    | 15 |
| <b>Figure S16:</b> Experimental and simulated PXRD of <b>CP9</b> . .....                                                                                                                                                                                                    | 16 |
| <b>Figure S17:</b> Experimental and simulated PXRD of <b>CP11</b> . .....                                                                                                                                                                                                   | 16 |
| <b>Figure S18:</b> ATR-IR spectrum of <b>CP9</b> . .....                                                                                                                                                                                                                    | 17 |
| <b>Figure S19.</b> TGA traces and its first derivatives of <b>CP1</b> under air flow. .....                                                                                                                                                                                 | 17 |
| <b>Figure S20.</b> TGA traces and its first derivatives of <b>CP2- D1</b> under air flow. .....                                                                                                                                                                             | 18 |
| <b>Figure S21.</b> TGA traces and its first derivatives of <b>CP3- D2</b> under air flow. .....                                                                                                                                                                             | 18 |
| <b>Figure S22.</b> TGA traces and its first derivatives of <b>CP5</b> under air flow. .....                                                                                                                                                                                 | 19 |
| <b>Figure S23.</b> TGA trace and its first derivatives of <b>CP6</b> under air flow. .....                                                                                                                                                                                  | 19 |
| <b>Figure S24.</b> TGA trace and its first derivatives of <b>CP7</b> under air flow. .....                                                                                                                                                                                  | 20 |
| <b>Figure S25.</b> TGA trace and its first derivatives of <b>CP8</b> under air flow. .....                                                                                                                                                                                  | 20 |
| <b>Figure S26.</b> TGA trace and its first derivatives of <b>CP9</b> under air flow. .....                                                                                                                                                                                  | 21 |
| <b>Figure S27.</b> TGA trace and its first derivatives of <b>CP10</b> under air flow. .....                                                                                                                                                                                 | 21 |
| <b>Figure S28.</b> TGA trace and its first derivatives of <b>CP11</b> under air flow. .....                                                                                                                                                                                 | 22 |

|                                                                                                                                                                                                                                                                                                                                                                                                                                                                                          |    |
|------------------------------------------------------------------------------------------------------------------------------------------------------------------------------------------------------------------------------------------------------------------------------------------------------------------------------------------------------------------------------------------------------------------------------------------------------------------------------------------|----|
| <b>Figure S29.</b> Solid-State Lifetime measurement of <b>CP1</b> (black) and the fitting curve (red) at 298K.....                                                                                                                                                                                                                                                                                                                                                                       | 22 |
| <b>Figure S30.</b> Solid-State Lifetime measurement of <b>CP5</b> (black) and the fitting curve (red) at 298K.....                                                                                                                                                                                                                                                                                                                                                                       | 23 |
| <b>Figure S31.</b> Yellow emission of <b>CP1</b> under UV light at 365 nm. ....                                                                                                                                                                                                                                                                                                                                                                                                          | 23 |
| <b>Figure S32.</b> <b>CP1</b> : a fragment of the structure showing C-H $\cdots\pi$ (C $\equiv$ C) and C-H $\cdots$ H-C interactions between the neighboured spacers.....                                                                                                                                                                                                                                                                                                                | 26 |
| <b>Figure S33.</b> C-H $\cdots\pi$ , C-H $\cdots$ X and C-H $\cdots$ S interactions in isostructural <b>CP2</b> (a) and <b>CP3</b> (b). Interatomic distances (Å) together with their shortening (Å) relative to the sum of Van der Waals radii: <b>CP2</b> : C9 $\cdots$ H10A 2.663 (-0.178), I1 $\cdots$ H12A 3.087 (-0.093) and S1 $\cdots$ H12A 2.958 (-0.042); <b>CP3</b> : C8 $\cdots$ H7A 2.742 (-0.158), Br1 $\cdots$ H6B 2.965 (-0.085) and S2 $\cdots$ H6B 2.936 (-0.064)..... | 27 |
| <b>Figure S34.</b> <b>CP2/D1</b> : C-H $\cdots$ C tetrel interaction connecting <b>CP2</b> and dinuclear discrete <b>D1</b> . H23A- C15 2.832 Å, -0.068Å with respect to the sum of the VdW radii.....                                                                                                                                                                                                                                                                                   | 27 |
| <b>Figure S35.</b> <b>CP2/D1</b> : C-H $\cdots$ H-C interactions connecting two <b>D1</b> molecules. H $\cdots$ H distance 2.252 (-0.148) Å. ....                                                                                                                                                                                                                                                                                                                                        | 27 |
| <b>Figure S36.</b> C-H $\cdots\pi$ interactions in <b>CP4</b> . ....                                                                                                                                                                                                                                                                                                                                                                                                                     | 28 |
| <b>Figure S37.</b> <b>CP8</b> : C-H $\cdots\pi$ (C $\equiv$ C), C-H $\cdots$ Cl and C-H $\cdots$ H-C interactions present in the crystal structure of CP8. Interatomic distances (Å) together with their shortening (Å) relative to the sum of Van der Waals radii: C2 $\cdots$ H6A 2.793 (-0.107), C3 $\cdots$ H8B 2.826 (-0.074), Cl1 $\cdots$ H1A 2.736 (-0.214), Cl1 $\cdots$ H4B 2.946 (-0.004), H4B $\cdots$ H8A 2.318 (-0.082). ....                                              | 28 |
| <b>Figure S38.</b> <b>CP9</b> : Br1 $\cdots$ H1C 3.018(-0.032) Å, Br2 $\cdots$ H1A 2.953(-0.097) Å.....                                                                                                                                                                                                                                                                                                                                                                                  | 28 |
| <b>Figure S39.</b> <b>CP11</b> : C-H $\cdots$ Cl and C-H $\cdots$ H-C interactions present in the crystal structure of <b>CP11</b> . Interatomic distances (Å) together with their shortening (Å) relative to the sum of the Van der Waals radii: Cl1 $\cdots$ H1C 2.882 (-0.068), Cl2 $\cdots$ H3A 2.745 (-0.205), Cl2 $\cdots$ H5B 2.776 (-0.174), Cl2 $\cdots$ H7A 2.849 (-0.101). ....                                                                                               | 29 |
| <b>Figure S40.</b> Molecular graphs showing the inter-ligand noncovalent interactions in 14 membered rings in the structures of (a) <b>CP3</b> and (b) <b>CP4</b> . <b>CP3</b> : S $\cdots\pi$ (C $\equiv$ C), C-H $\cdots\pi$ (C $\equiv$ C) and C-H $\cdots$ Br, <b>CP4</b> : S $\cdots\pi$ (C $\equiv$ C) and C-H $\cdots$ Cl and exterior to the ring C-H $\cdots$ H-C bond paths. ....                                                                                              | 30 |
| <b>Figure S41.</b> Molecular graphs of (a) <b>CP6</b> and (b) <b>CP7</b> . <b>CP6</b> : S $\cdots\pi$ (C $\equiv$ C), C-H $\cdots\pi$ (C $\equiv$ C) C-H $\cdots$ H-C C-H $\cdots$ S and C-H $\cdots$ I bond paths; <b>CP7</b> : S $\cdots\pi$ (C $\equiv$ C), C-H $\cdots\pi$ (C $\equiv$ C) and C-H $\cdots$ Br, C-H $\cdots$ S and C-H $\cdots$ H-C bond paths.....                                                                                                                   | 30 |
| <b>Table S1</b> Comparison of the Cu $\cdots$ Cu distances within molecular [S <sub>2</sub> {Cu(μ <sub>2</sub> -X) <sub>2</sub> Cu}S <sub>2</sub> ] compounds. ....                                                                                                                                                                                                                                                                                                                      | 7  |
| <b>Table S2</b> Crystal data, data collection, and structure refinement for <b>CP1</b> . ....                                                                                                                                                                                                                                                                                                                                                                                            | 8  |
| <b>Table S3</b> Crystal data, data collection, and structure refinement for <b>CP2-D1</b> at variable temperature. ....                                                                                                                                                                                                                                                                                                                                                                  | 9  |
| <b>Table S4</b> Crystal data, data collection, and structure refinement for <b>CP3D2</b> , <b>CP4</b> , <b>CP5</b> , <b>CP6</b> and <b>CP7</b> . ....                                                                                                                                                                                                                                                                                                                                    | 10 |
| <b>Table S5</b> Crystal data, data collection, and structure refinement for <b>CP8</b> , <b>CP9</b> , <b>CP10</b> and <b>CP11</b> . ....                                                                                                                                                                                                                                                                                                                                                 | 11 |
| <b>Table S6.</b> Topological properties of bond critical points (mean values); d (distance), ρ (electron density), ∇ <sup>2</sup> ρ (Laplacian of ρ), H (total energy density), V potential energy density, G kinetic energy density, DI (delocalization index), Wiberg (bond index from NBO analysis). ....                                                                                                                                                                             | 29 |
| X-ray data and experimental refinement.....                                                                                                                                                                                                                                                                                                                                                                                                                                              | 31 |

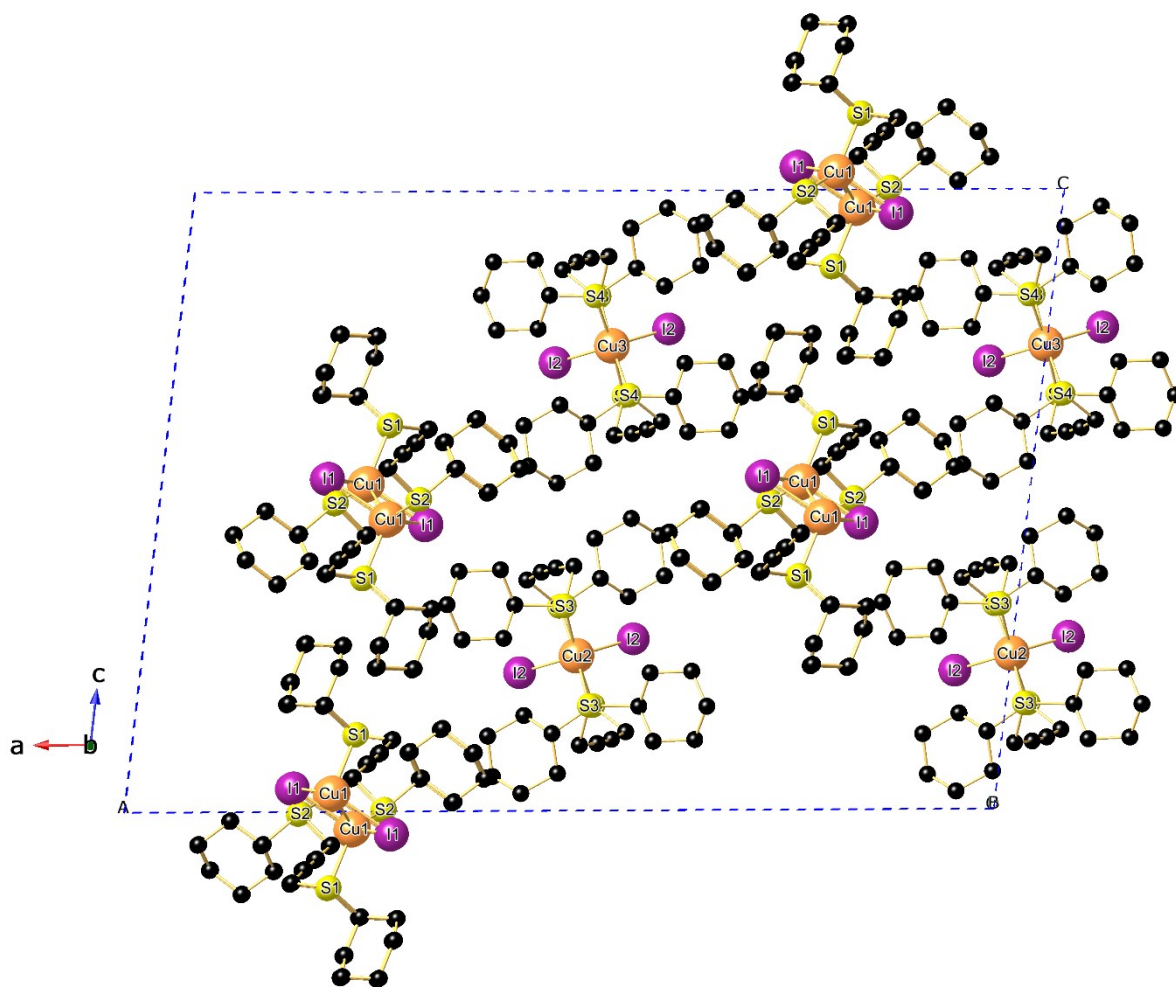

**Figure S1.** View of the  $[ac]$  plane down the  $b$  axis of  $[\{\text{Cu}(\mu_2\text{-I})_2\text{Cu}\}(\mu\text{-L1})_2]_n$  (CP2) and co-crystallized discrete molecules of  $[\{\text{Cu}(\mu_2\text{-I})_2\text{Cu}\}(\mu\text{-L1})_2]$  D1.

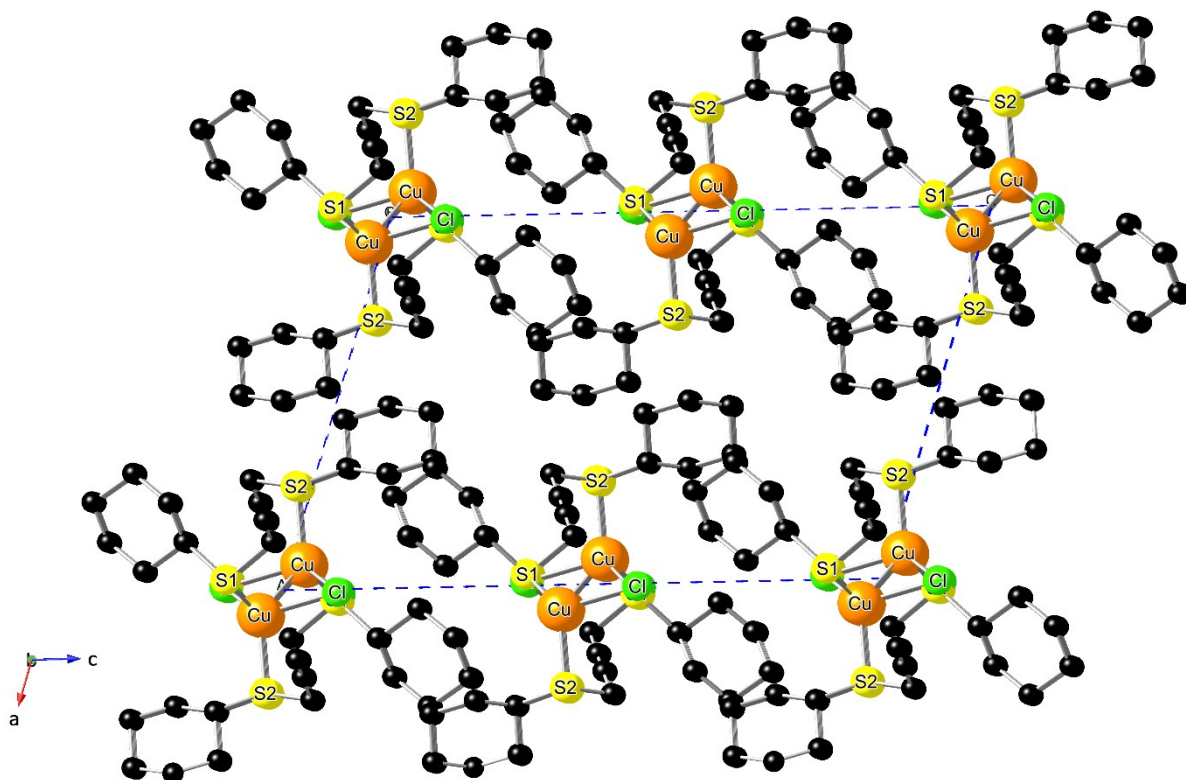

Figure S2. View of the [ac] plane down the *b* axis of [ $\text{Cu}(\mu_2\text{-Cl})_2\text{Cu}\}(\mu\text{-L1})_2]_n$  (CP4).

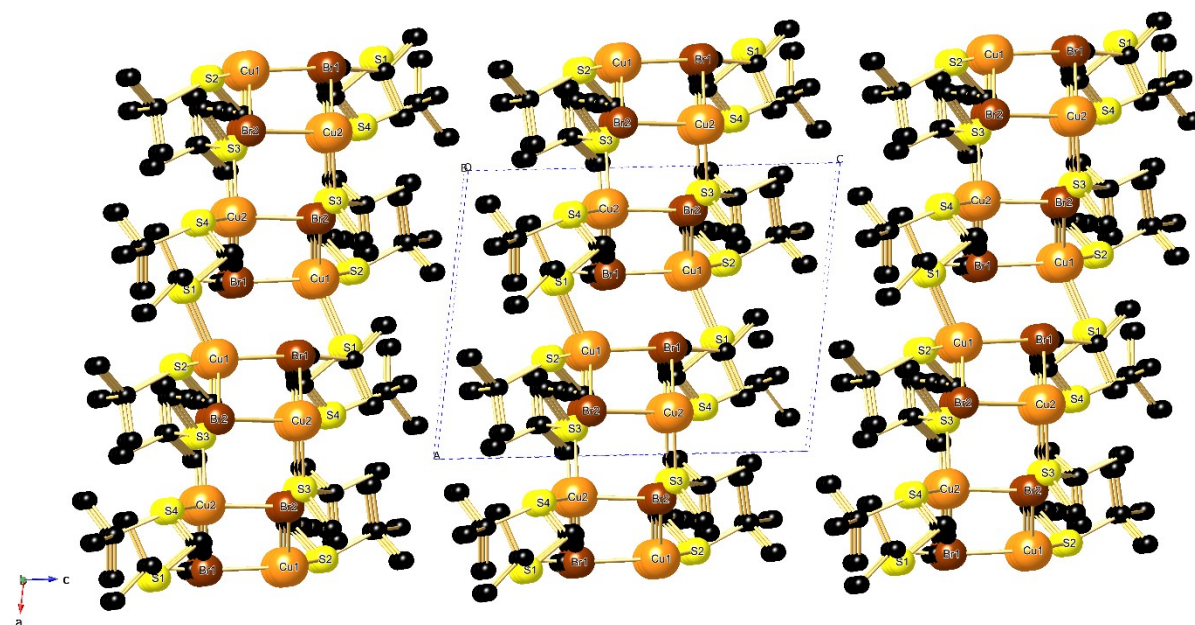

Figure S3. View of the [ac] plane down the *b* axis of [ $\text{Cu}(\mu_2\text{-Br})_2\text{Cu}\}(\mu\text{-L2})_2]_n$  (CP7).



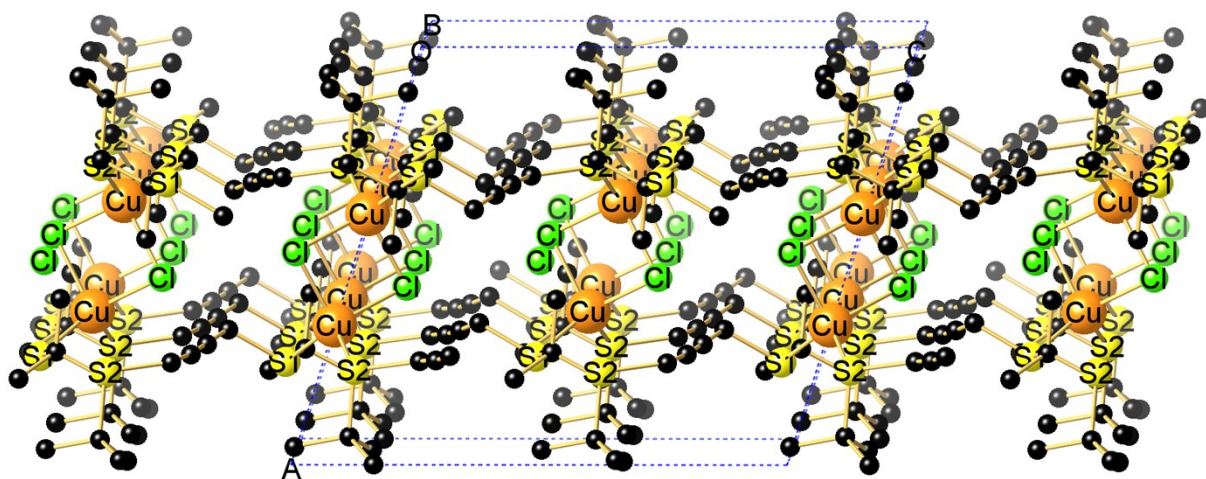

Figure S4. View of the  $[ac]$  plane down the  $b$  axis of  $[\{\text{Cu}(\mu_2\text{-Cl})_2\text{Cu}\}(\mu\text{-L2})_2]_n$  (CP8).

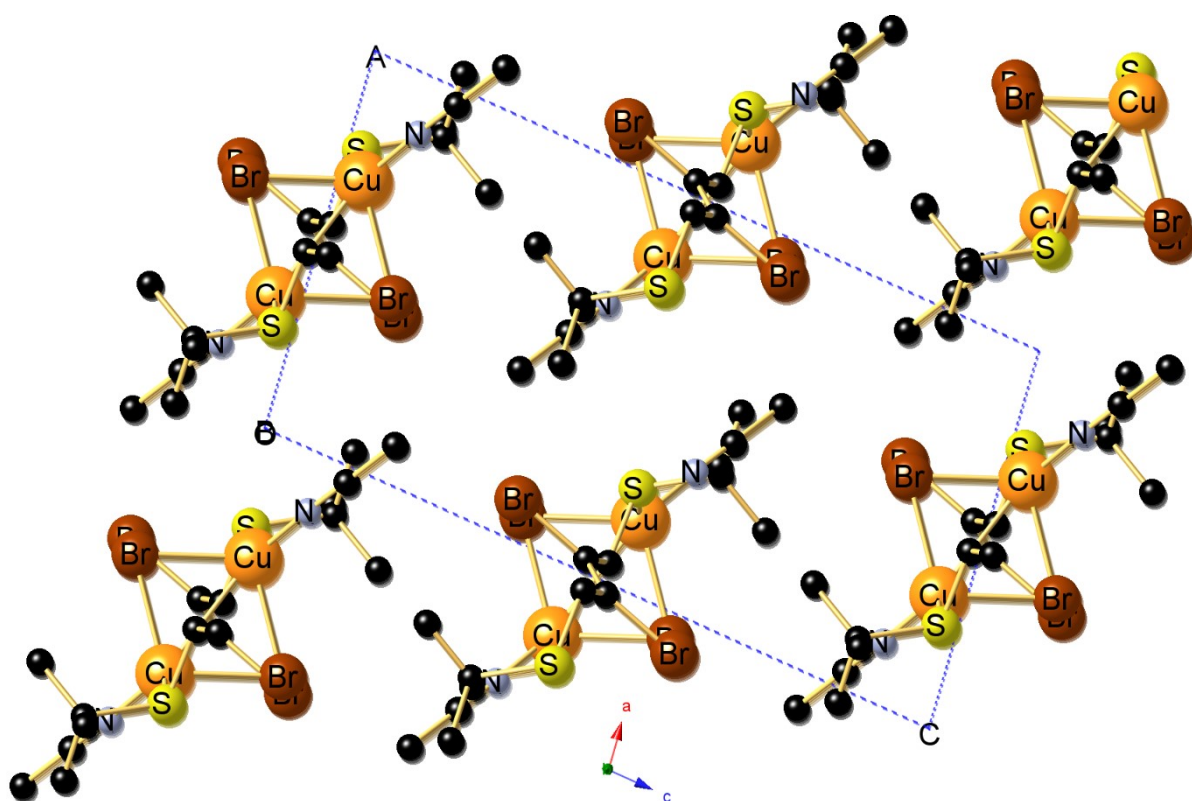

Figure S5. View of the  $[ac]$  plane down the  $b$  axis of  $[\{\text{Cu}(\mu_2\text{-Br})_2\text{Cu}\}(\text{CH}_3\text{CN})(\mu\text{-L3})_2]_n$  CP9.

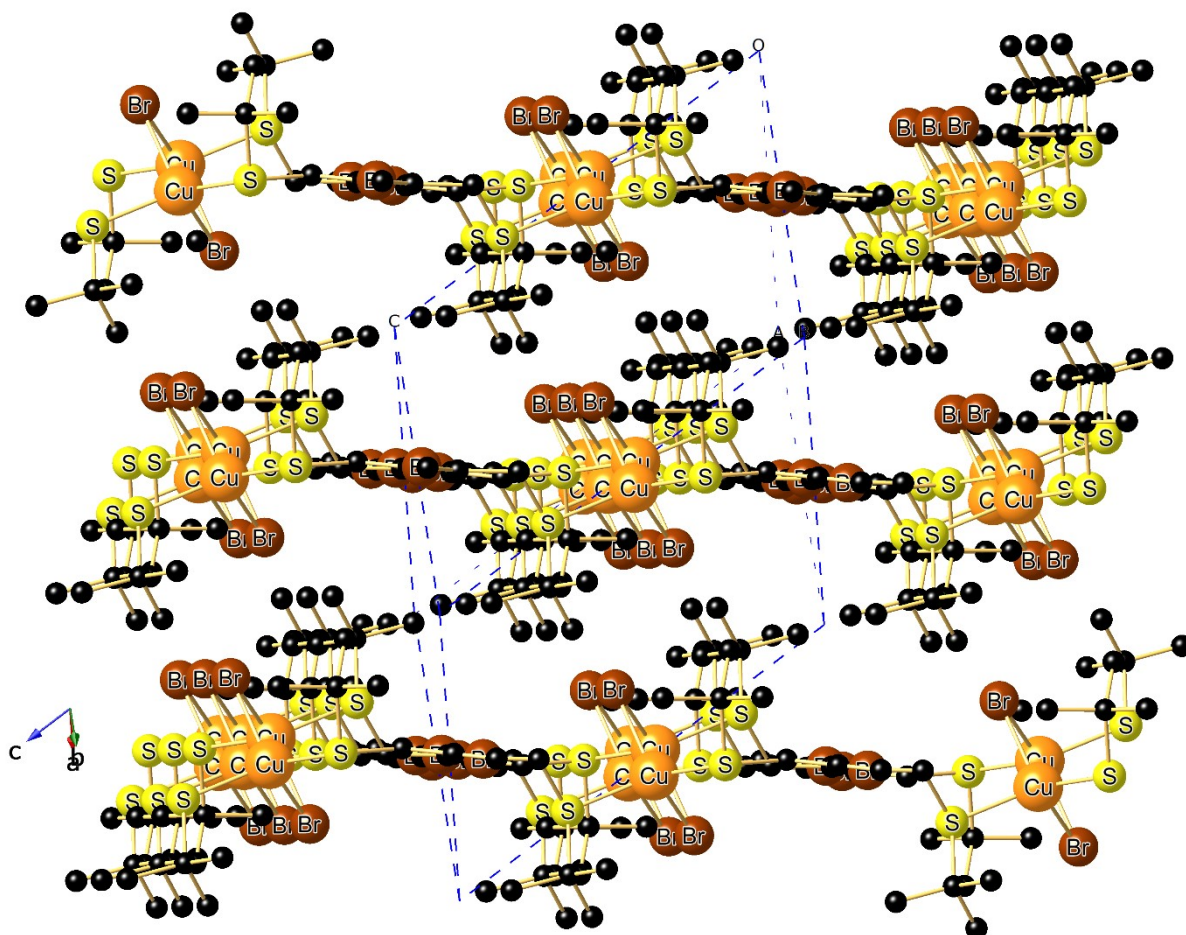

Figure S6. View of three layers of the 2D  $[\{\text{Cu}(\mu_2\text{-Br})_2\text{Cu}\}(\mu\text{-L2})(\mu\text{-L3})]_n$  (CP10).

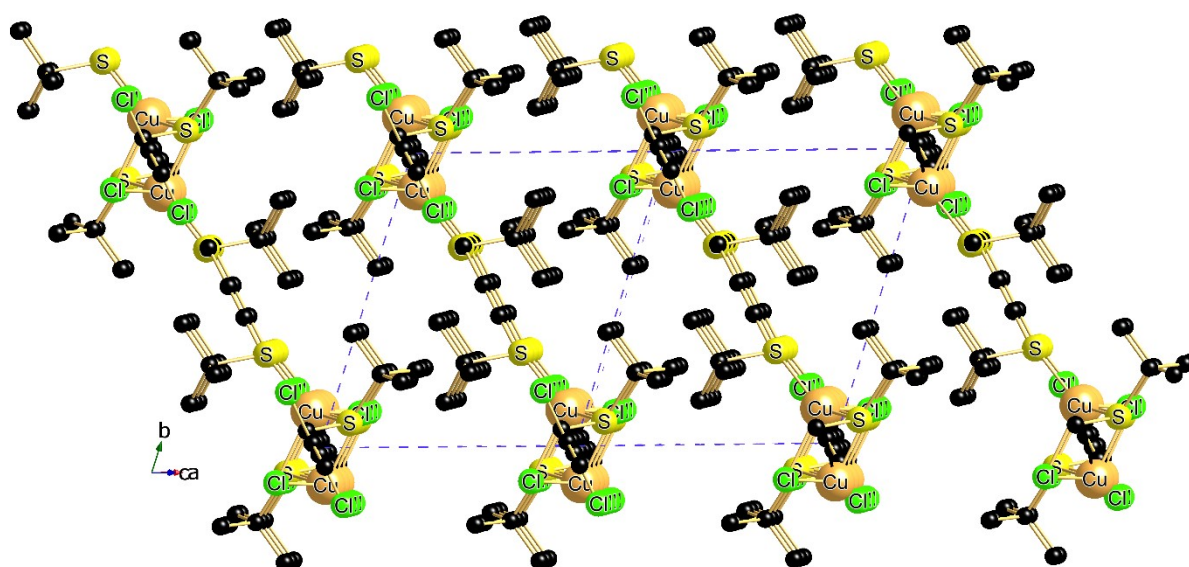

Figure S7. View of four layers of the 2D  $[\{\text{Cu}(\mu_2\text{-Cl})_2\text{Cu}\}(\mu\text{-L2})(\mu\text{-L3})]_n$  (CP11).

**Table S1** Comparison of the Cu···Cu distances within molecular  $[S_2\{Cu(\mu_2-X)_2Cu\}S_2]$  compounds.

| Compound name                                                                                                                          | Cu···Cu (Å) | Reference CSD        | X  |
|----------------------------------------------------------------------------------------------------------------------------------------|-------------|----------------------|----|
| bis( $\mu_2$ -I)-bis(tris(((2- <i>t</i> -butyl-4-methylphenyl)thio)methyl)-amine- <i>S,S'</i> )dicopper                                | 2.582       | ENAWUM <sup>1</sup>  | I  |
| bis(( $\mu_2$ -I)-(1,2,4,5-tetramethylmercaptobenzene))dicopper                                                                        | 2.616       | PUGQIR <sup>2</sup>  | I  |
| bis(( $\mu_2$ -I)(dimethyl-2-(4,5-bis(methylthio)-1,3-dithiol-2-ylidene)-1,3-dithiole-4,5-dicarboxylate))dicopper                      | 2.647       | MARFOB <sup>3</sup>  | I  |
| bis( $\mu_2$ -I)-bis(bis(tetrahydrothiophene))dicopper                                                                                 | 2.675       | FUHCEQ <sup>4</sup>  | I  |
| bis(( $\mu_2$ -I)-bis(2,5-dioxa-8,11,14-trithia-1,6(1,2)dibenzenacyclo-pentadecaphane))dicopper                                        | 2.683       | IGOBIO <sup>5</sup>  | I  |
| bis( $\mu_2$ -I)-bis(7,8,16,17-tetrahydro-5H,10H-dibenzo[ <i>e,m</i> ][1,4,8,11]dioxadithiacyclotetradecine- <i>S,S'</i> )dicopper     | 2.688       | HUWVOL <sup>6</sup>  | I  |
| bis(( $\mu_2$ -I)-bis(3,14,25-trioxa-11,17-dithiatetracyclohentriconta 1(31),4,6,8,19,21,23,27,29-nonaene))dicopper                    | 2.701       | UJUWIG <sup>7</sup>  | I  |
| bis(( $\mu_2$ -I)-(ethylenedithiobis(methylthio)tetrathiafulvalene))di-copper                                                          | 2.734       | NEZBOJ <sup>8</sup>  | I  |
| bis( $\mu_2$ -I)-bis(7,8,10,11,19,20,22,23-octahydro-5H,13H-dibenzo [ <i>h,s</i> ][1,4,7,14,11,17]tetraoxadithiacycloicosane))dicopper | 2.846       | POFZER <sup>9</sup>  | I  |
| bis( $\mu_2$ -I)-bis(1,4-dithia-7-oxacyclononane-1,4-diyl))dicopper                                                                    | 2.860       | HALZOK <sup>10</sup> | I  |
| bis(( $\mu_2$ -I)-bis(methyltris(methylthiomethyl)silane- $\kappa^2$ S, <i>S'</i> ))di-copper                                          | 2.863       | TAKWIM <sup>11</sup> | I  |
| bis( $\mu_2$ -I)-bis( $\mu_2$ -(1,1'-(but-2-yne-1,4-diylbis((sulfanediy)methylene))dibenzene))dicopper                                 | 2.928       | QUPXAC <sup>12</sup> | I  |
| bis(( $\mu_2$ -I)-(1,2-bis(cyclohexylthiomethyl)benzene))dicopper                                                                      | 2.956       | BOBXUM <sup>13</sup> | I  |
| bis(( $\mu_2$ -Br)-bis( $\mu$ -(1,1'-(but-2-ene-1,4-diylbis(sulfanediy))dibenzene))dicopper                                            | 2.740       | KAKVIE <sup>14</sup> | Br |
| bis(( $\mu_2$ -Br)-(1-oxa-4,7-dithiacyclononane))dicopper                                                                              | 2.852       | NONWOC <sup>15</sup> | Br |
| bis( $\mu_2$ -Br)-bis(7,8,16,17-tetrahydro-5H,10H-dibenzo[ <i>e,m</i> ][1,4,8,11]dioxadithiacyclotetradecine- <i>S,S'</i> )dicopper    | 2.919       | HUWVEB <sup>6</sup>  | Br |
| bis(( $\mu_2$ -Br)-tetrakis(phenylpropargyl sulfide))dicopper                                                                          | 3.006       | VEQXUM <sup>16</sup> | Br |
| bis( $\mu_2$ -Br)-bis( $\mu_2$ -(1,1'-(but-2-yne-1,4-diylbis((sulfanediy)methylene))dibenzene))dicopper                                | 3.008       | QUPXEG <sup>12</sup> | Br |

**Table S2** Crystal data, data collection, and structure refinement for CP1.

| Internal Reference                                     | CP1_100K                                                                        | CP1_150K                                                                        | CP1_200K                                                                        | CP1_250K                                                                        | CP1_300K                                                                        |
|--------------------------------------------------------|---------------------------------------------------------------------------------|---------------------------------------------------------------------------------|---------------------------------------------------------------------------------|---------------------------------------------------------------------------------|---------------------------------------------------------------------------------|
| CCDC number                                            | 2326781                                                                         | 2326782                                                                         | 2356779                                                                         | 2326780                                                                         | 2326653                                                                         |
| Empirical formula                                      | C <sub>64</sub> H <sub>104</sub> Cu <sub>8</sub> I <sub>8</sub> S <sub>8</sub>  | C <sub>64</sub> H <sub>104</sub> Cu <sub>8</sub> I <sub>8</sub> S <sub>8</sub>  | C <sub>64</sub> H <sub>104</sub> Cu <sub>8</sub> I <sub>8</sub> S <sub>8</sub>  | C <sub>64</sub> H <sub>104</sub> Cu <sub>8</sub> I <sub>8</sub> S <sub>8</sub>  | C <sub>64</sub> H <sub>104</sub> Cu <sub>8</sub> I <sub>8</sub> S <sub>8</sub>  |
| Formula weight                                         | 2653.47                                                                         | 2653.47                                                                         | 2653.47                                                                         | 2653.47                                                                         | 2653.47                                                                         |
| Temperature [K]                                        | 100.0(1)                                                                        | 150.0(1)                                                                        | 200.0(1)                                                                        | 250.0(1)                                                                        | 300.0(1)                                                                        |
| Crystal system                                         | triclinic                                                                       | triclinic                                                                       | triclinic                                                                       | triclinic                                                                       | triclinic                                                                       |
| Space group (number)                                   | <i>P</i> 1 (2)                                                                  |
| <i>a</i> [Å]                                           | 11.7692(4)                                                                      | 11.7999(4)                                                                      | 11.8439(4)                                                                      | 11.8961(4)                                                                      | 11.9606(16)                                                                     |
| <i>b</i> [Å]                                           | 18.6908(5)                                                                      | 18.7275(5)                                                                      | 18.8172(5)                                                                      | 18.9380(7)                                                                      | 19.095(3)                                                                       |
| <i>c</i> [Å]                                           | 20.6753(6)                                                                      | 20.7647(6)                                                                      | 20.8187(6)                                                                      | 20.9008(7)                                                                      | 21.026(3)                                                                       |
| $\alpha$ [°]                                           | 97.2090(10)                                                                     | 97.4108(10)                                                                     | 97.3254(10)                                                                     | 97.0884(14)                                                                     | 96.658(4)                                                                       |
| $\beta$ [°]                                            | 104.8990(10)                                                                    | 104.6354(10)                                                                    | 104.5536(10)                                                                    | 104.7460(13)                                                                    | 105.219(4)                                                                      |
| $\gamma$ [°]                                           | 103.0370(10)                                                                    | 103.1049(10)                                                                    | 103.6389(10)                                                                    | 104.3167(13)                                                                    | 105.342(4)                                                                      |
| Volume [Å <sup>3</sup> ]                               | 4199.8(2)                                                                       | 4238.8(2)                                                                       | 4277.4(2)                                                                       | 4324.1(3)                                                                       | 4378.9(10)                                                                      |
| <i>Z</i>                                               | 2                                                                               | 2                                                                               | 2                                                                               | 2                                                                               | 2                                                                               |
| $\rho_{\text{calc}}$ [gcm <sup>-3</sup> ]              | 2.098                                                                           | 2.079                                                                           | 2.060                                                                           | 2.038                                                                           | 2.012                                                                           |
| $\mu$ [mm <sup>-1</sup> ]                              | 5.159                                                                           | 5.112                                                                           | 5.066                                                                           | 5.011                                                                           | 4.948                                                                           |
| <i>F</i> (000)                                         | 2544                                                                            | 2544                                                                            | 2544                                                                            | 2544                                                                            | 2544                                                                            |
| Crystal size [mm <sup>3</sup> ]                        | 0.084×0.133×0.172                                                               | 0.084×0.133×0.172                                                               | 0.084×0.133×0.172                                                               | 0.084×0.133×0.172                                                               | 0.084×0.143×0.168                                                               |
| Crystal colour                                         | clear light colourless                                                          |
| Crystal shape                                          | block                                                                           | block                                                                           | block                                                                           | block                                                                           | block                                                                           |
| Radiation                                              | Mo <i>K</i> <sub>α</sub> (λ=0.71073 Å)                                          |
| 2θ range [°]                                           | 4.33 to 55.00 (0.77 Å)                                                          | 4.31 to 55.00 (0.77 Å)                                                          | 4.30 to 55.00 (0.77 Å)                                                          | 4.28 to 55.00 (0.77 Å)                                                          | 2.05 to 50.00 (0.84 Å)                                                          |
| Index ranges                                           | -15 ≤ <i>h</i> ≤ 15<br>-24 ≤ <i>k</i> ≤ 24<br>-26 ≤ <i>l</i> ≤ 26               | -15 ≤ <i>h</i> ≤ 15<br>-24 ≤ <i>k</i> ≤ 24<br>-26 ≤ <i>l</i> ≤ 26               | -15 ≤ <i>h</i> ≤ 15<br>-24 ≤ <i>k</i> ≤ 24<br>-27 ≤ <i>l</i> ≤ 27               | -15 ≤ <i>h</i> ≤ 15<br>-24 ≤ <i>k</i> ≤ 24<br>-27 ≤ <i>l</i> ≤ 27               | -14 ≤ <i>h</i> ≤ 14<br>-22 ≤ <i>k</i> ≤ 22<br>-24 ≤ <i>l</i> ≤ 24               |
| Reflections collected                                  | 240995                                                                          | 509188                                                                          | 386877                                                                          | 260876                                                                          | 100554                                                                          |
| Independent reflections                                | 19283<br><i>R</i> <sub>int</sub> = 0.0305<br><i>R</i> <sub>sigma</sub> = 0.0131 | 19468<br><i>R</i> <sub>int</sub> = 0.0282<br><i>R</i> <sub>sigma</sub> = 0.0090 | 19652<br><i>R</i> <sub>int</sub> = 0.0300<br><i>R</i> <sub>sigma</sub> = 0.0110 | 19874<br><i>R</i> <sub>int</sub> = 0.0369<br><i>R</i> <sub>sigma</sub> = 0.0172 | 15416<br><i>R</i> <sub>int</sub> = 0.0941<br><i>R</i> <sub>sigma</sub> = 0.0442 |
| Completeness to<br>$\theta = 25.242^\circ$             | 99.9 %                                                                          | 99.9 %                                                                          | 99.9 %                                                                          | 99.9 %                                                                          | 99.9 %                                                                          |
| Data / Restraints / Parameters                         | 19283 / 736 / 914                                                               | 19468 / 736 / 914                                                               | 19652 / 737 / 914                                                               | 19874 / 734 / 914                                                               | 15416 / 675 / 910                                                               |
| Goodness-of-fit on <i>F</i> <sup>2</sup>               | 1.025                                                                           | 1.086                                                                           | 1.080                                                                           | 1.067                                                                           | 1.040                                                                           |
| Final <i>R</i> indexes<br>[ <i>I</i> ≥ 2σ( <i>I</i> )] | <i>R</i> <sub>1</sub> = 0.0288<br><i>wR</i> <sub>2</sub> = 0.0571               | <i>R</i> <sub>1</sub> = 0.0289<br><i>wR</i> <sub>2</sub> = 0.0568               | <i>R</i> <sub>1</sub> = 0.0309<br><i>wR</i> <sub>2</sub> = 0.0670               | <i>R</i> <sub>1</sub> = 0.0397<br><i>wR</i> <sub>2</sub> = 0.0899               | <i>R</i> <sub>1</sub> = 0.0573<br><i>wR</i> <sub>2</sub> = 0.1493               |
| Final <i>R</i> indexes<br>[all data]                   | <i>R</i> <sub>1</sub> = 0.0335<br><i>wR</i> <sub>2</sub> = 0.0601               | <i>R</i> <sub>1</sub> = 0.0334<br><i>wR</i> <sub>2</sub> = 0.0604               | <i>R</i> <sub>1</sub> = 0.0376<br><i>wR</i> <sub>2</sub> = 0.0725               | <i>R</i> <sub>1</sub> = 0.0557<br><i>wR</i> <sub>2</sub> = 0.1021               | <i>R</i> <sub>1</sub> = 0.0825<br><i>wR</i> <sub>2</sub> = 0.1673               |
| Largest peak/hole [eÅ <sup>-3</sup> ]                  | 2.51/-2.88                                                                      | 1.80/-1.81                                                                      | 1.43/-1.23                                                                      | 1.61/-0.72                                                                      | 2.06/-0.63                                                                      |



**Table S3** Crystal data, data collection, and structure refinement for **CP2-D1** at variable temperature.

| Internal Reference                              | CP2D1_100K                                                                     | CP2D1_140K                                                                     | CP2D1_180K                                                                     | CP2D1_220K                                                                     | CP2D1_260K                                                                     | CP2D1_300k                                                                     |
|-------------------------------------------------|--------------------------------------------------------------------------------|--------------------------------------------------------------------------------|--------------------------------------------------------------------------------|--------------------------------------------------------------------------------|--------------------------------------------------------------------------------|--------------------------------------------------------------------------------|
| CCDC number                                     | 2326783                                                                        | 2326502                                                                        | 2326503                                                                        | 2326504                                                                        | 2326505                                                                        | 2326506                                                                        |
| Empirical formula                               | C <sub>16</sub> H <sub>26</sub> CuIS <sub>2</sub>                              |
| Formula weight                                  | 472.93                                                                         | 472.93                                                                         | 472.93                                                                         | 472.93                                                                         | 472.93                                                                         | 472.93                                                                         |
| Temperature [K]                                 | 100.0(1)                                                                       | 140.0(1)                                                                       | 180.0(1)                                                                       | 220.0(1)                                                                       | 260.0(1)                                                                       | 300.0(1)                                                                       |
| Crystal system                                  | monoclinic                                                                     | monoclinic                                                                     | monoclinic                                                                     | monoclinic                                                                     | monoclinic                                                                     | monoclinic                                                                     |
| Space group (number)                            | <i>C2/c</i> (15)                                                               |
| <i>a</i> [Å]                                    | 31.839(2)                                                                      | 31.853(2)                                                                      | 31.8836(12)                                                                    | 31.903(2)                                                                      | 31.932(2)                                                                      | 31.9681(8)                                                                     |
| <i>b</i> [Å]                                    | 10.1369(7)                                                                     | 10.1612(6)                                                                     | 10.1900(4)                                                                     | 10.2246(7)                                                                     | 10.2558(7)                                                                     | 10.2932(2)                                                                     |
| <i>c</i> [Å]                                    | 22.8562(15)                                                                    | 22.9100(14)                                                                    | 22.9758(9)                                                                     | 23.0547(15)                                                                    | 23.1217(16)                                                                    | 23.1990(7)                                                                     |
| $\alpha$ [°]                                    | 90                                                                             | 90                                                                             | 90                                                                             | 90                                                                             | 90                                                                             | 90                                                                             |
| $\beta$ [°]                                     | 96.789(2)                                                                      | 96.804(2)                                                                      | 96.8390(10)                                                                    | 96.911(2)                                                                      | 96.952(3)                                                                      | 97.0950(10)                                                                    |
| $\gamma$ [°]                                    | 90                                                                             | 90                                                                             | 90                                                                             | 90                                                                             | 90                                                                             | 90                                                                             |
| Volume [Å <sup>3</sup> ]                        | 7325.0(9)                                                                      | 7363.0(8)                                                                      | 7411.6(5)                                                                      | 7465.8(9)                                                                      | 7516.5(9)                                                                      | 7575.3(3)                                                                      |
| <i>Z</i>                                        | 16                                                                             | 16                                                                             | 16                                                                             | 16                                                                             | 16                                                                             | 16                                                                             |
| $\rho_{\text{calc}}$ [gcm <sup>-3</sup> ]       | 1.715                                                                          | 1.707                                                                          | 1.695                                                                          | 1.683                                                                          | 1.672                                                                          | 1.659                                                                          |
| $\mu$ [mm <sup>-1</sup> ]                       | 3.096                                                                          | 3.080                                                                          | 3.060                                                                          | 3.038                                                                          | 3.017                                                                          | 2.994                                                                          |
| <i>F</i> (000)                                  | 3776                                                                           | 3776                                                                           | 3776                                                                           | 3776                                                                           | 3776                                                                           | 3776                                                                           |
| Crystal size [mm <sup>3</sup> ]                 | 0.247×0.279×0.481                                                              | 0.247×0.279×0.481                                                              | 0.247×0.279×0.481                                                              | 0.247×0.279×0.481                                                              | 0.247×0.279×0.481                                                              | 0.247×0.279×0.481                                                              |
| Crystal colour                                  | clear light yellow                                                             |
| Crystal shape                                   | block                                                                          | block                                                                          | block                                                                          | block                                                                          | block                                                                          | block                                                                          |
| Radiation                                       | Mo <i>K</i> <sub><math>\alpha</math></sub> ( $\lambda=0.71073$ Å)              |
| 2 $\theta$ range [°]                            | 5.64 to 55.00 (0.77 Å)                                                         | 5.43 to 54.99 (0.77 Å)                                                         | 5.41 to 55.00 (0.77 Å)                                                         | 5.39 to 55.00 (0.77 Å)                                                         | 5.67 to 55.00 (0.77 Å)                                                         | 5.52 to 55.00 (0.77 Å)                                                         |
| Index ranges                                    | -41 ≤ <i>h</i> ≤ 41<br>-13 ≤ <i>k</i> ≤ 13<br>-29 ≤ <i>l</i> ≤ 29              | -41 ≤ <i>h</i> ≤ 41<br>-13 ≤ <i>k</i> ≤ 13<br>-29 ≤ <i>l</i> ≤ 29              | -41 ≤ <i>h</i> ≤ 41<br>-13 ≤ <i>k</i> ≤ 13<br>-29 ≤ <i>l</i> ≤ 29              | -41 ≤ <i>h</i> ≤ 41<br>-13 ≤ <i>k</i> ≤ 13<br>-29 ≤ <i>l</i> ≤ 29              | -41 ≤ <i>h</i> ≤ 41<br>-13 ≤ <i>k</i> ≤ 13<br>-30 ≤ <i>l</i> ≤ 30              | -41 ≤ <i>h</i> ≤ 41<br>-13 ≤ <i>k</i> ≤ 13<br>-30 ≤ <i>l</i> ≤ 30              |
| Reflections collected                           | 96786                                                                          | 85404                                                                          | 85592                                                                          | 85128                                                                          | 67034                                                                          | 72825                                                                          |
| Independent reflections                         | 8412<br><i>R</i> <sub>int</sub> = 0.0284<br><i>R</i> <sub>sigma</sub> = 0.0127 | 8436<br><i>R</i> <sub>int</sub> = 0.0248<br><i>R</i> <sub>sigma</sub> = 0.0117 | 8493<br><i>R</i> <sub>int</sub> = 0.0236<br><i>R</i> <sub>sigma</sub> = 0.0122 | 8547<br><i>R</i> <sub>int</sub> = 0.0225<br><i>R</i> <sub>sigma</sub> = 0.0128 | 8597<br><i>R</i> <sub>int</sub> = 0.0242<br><i>R</i> <sub>sigma</sub> = 0.0151 | 8681<br><i>R</i> <sub>int</sub> = 0.0514<br><i>R</i> <sub>sigma</sub> = 0.0252 |
| Completeness to $\theta = 25.242^\circ$         | 99.8 %                                                                         | 99.7 %                                                                         | 99.7 %                                                                         | 99.6 %                                                                         | 99.6 %                                                                         | 99.7 %                                                                         |
| Data / Restraints / Parameters                  | 8412 / 0 / 362                                                                 | 8436 / 0 / 362                                                                 | 8493 / 0 / 362                                                                 | 8547 / 0 / 363                                                                 | 8597 / 0 / 362                                                                 | 8681 / 12 / 362                                                                |
| Goodness-of-fit on <i>F</i> <sup>2</sup>        | 1.169                                                                          | 1.147                                                                          | 1.157                                                                          | 1.163                                                                          | 1.124                                                                          | 1.041                                                                          |
| Final <i>R</i> indexes<br>[ $\geq 2\sigma(I)$ ] | <i>R</i> <sub>1</sub> = 0.0161<br><i>wR</i> <sub>2</sub> = 0.0388              | <i>R</i> <sub>1</sub> = 0.0162<br><i>wR</i> <sub>2</sub> = 0.0390              | <i>R</i> <sub>1</sub> = 0.0165<br><i>wR</i> <sub>2</sub> = 0.0401              | <i>R</i> <sub>1</sub> = 0.0165<br><i>wR</i> <sub>2</sub> = 0.0411              | <i>R</i> <sub>1</sub> = 0.0177<br><i>wR</i> <sub>2</sub> = 0.0432              | <i>R</i> <sub>1</sub> = 0.0198<br><i>wR</i> <sub>2</sub> = 0.0511              |
| Final <i>R</i> indexes<br>[all data]            | <i>R</i> <sub>1</sub> = 0.0163<br><i>wR</i> <sub>2</sub> = 0.0389              | <i>R</i> <sub>1</sub> = 0.0165<br><i>wR</i> <sub>2</sub> = 0.0391              | <i>R</i> <sub>1</sub> = 0.0169<br><i>wR</i> <sub>2</sub> = 0.0403              | <i>R</i> <sub>1</sub> = 0.0171<br><i>wR</i> <sub>2</sub> = 0.0414              | <i>R</i> <sub>1</sub> = 0.0189<br><i>wR</i> <sub>2</sub> = 0.0438              | <i>R</i> <sub>1</sub> = 0.0254<br><i>wR</i> <sub>2</sub> = 0.0527              |
| Largest peak/hole [eÅ <sup>-3</sup> ]           | 0.88/-0.52                                                                     | 0.64/-0.47                                                                     | 0.60/-0.50                                                                     | 0.67/-0.42                                                                     | 0.59/-0.49                                                                     | 0.64/-0.32                                                                     |

**Table S4** Crystal data, data collection, and structure refinement for CP3D2, CP4, CP5, CP6 and CP7.

| Internal Reference                                | CP3D2                                                             | CP4                                                               | CP5                                                                           | CP6                                                               | CP7                                                                            |
|---------------------------------------------------|-------------------------------------------------------------------|-------------------------------------------------------------------|-------------------------------------------------------------------------------|-------------------------------------------------------------------|--------------------------------------------------------------------------------|
| CCDC number                                       | 2326258                                                           | 2326259                                                           | 2326261                                                                       | 2326262                                                           | 2326263                                                                        |
| Empirical formula                                 | C <sub>16</sub> H <sub>26</sub> BrCuS <sub>2</sub>                | C <sub>16</sub> H <sub>26</sub> ClCuS <sub>2</sub>                | C <sub>24</sub> H <sub>44</sub> Cu <sub>4</sub> I <sub>4</sub> S <sub>4</sub> | C <sub>12</sub> H <sub>22</sub> CuI <sub>2</sub> S <sub>2</sub>   | C <sub>24</sub> H <sub>44</sub> Br <sub>2</sub> Cu <sub>2</sub> S <sub>4</sub> |
| Formula weight                                    | 425.94                                                            | 381.48                                                            | 1222.59                                                                       | 420.85                                                            | 747.73                                                                         |
| Temperature [K]                                   | 150.0(1)                                                          | 115.0(1)                                                          | 100.0(1)                                                                      | 100.0(1)                                                          | 115.00                                                                         |
| Crystal system                                    | monoclinic                                                        | monoclinic                                                        | orthorhombic                                                                  | monoclinic                                                        | monoclinic                                                                     |
| Space group (number)                              | <i>C2/c</i> (15)                                                  | <i>P2<sub>1</sub>/c</i> (14)                                      | <i>P2<sub>1</sub>2<sub>1</sub>2<sub>1</sub></i> (19)                          | <i>P2<sub>1</sub>/c</i> (14)                                      | <i>P2<sub>1</sub></i> (4)                                                      |
| <i>a</i> [Å]                                      | 31.366(2)                                                         | 11.3631(5)                                                        | 9.9428(8)                                                                     | 11.4251(3)                                                        | 8.7637(14)                                                                     |
| <i>b</i> [Å]                                      | 10.0042(7)                                                        | 9.2959(4)                                                         | 18.9973(17)                                                                   | 16.2605(4)                                                        | 15.977(2)                                                                      |
| <i>c</i> [Å]                                      | 22.8146(17)                                                       | 17.5929(7)                                                        | 19.2437(15)                                                                   | 8.8793(2)                                                         | 11.262(2)                                                                      |
| $\alpha$ [°]                                      | 90                                                                | 90                                                                | 90                                                                            | 90                                                                | 90                                                                             |
| $\beta$ [°]                                       | 96.959(8)                                                         | 107.3267(13)                                                      | 90                                                                            | 99.6380(10)                                                       | 97.425(5)                                                                      |
| $\gamma$ [°]                                      | 90                                                                | 90                                                                | 90                                                                            | 90                                                                | 90                                                                             |
| Volume [Å <sup>3</sup> ]                          | 7106.2(9)                                                         | 1774.01(13)                                                       | 3634.9(5)                                                                     | 1626.29(7)                                                        | 1563.7(4)                                                                      |
| <i>Z</i>                                          | 16                                                                | 4                                                                 | 4                                                                             | 4                                                                 | 2                                                                              |
| $\rho_{\text{calc}}$ [gcm <sup>-3</sup> ]         | 1.592                                                             | 1.428                                                             | 2.234                                                                         | 1.719                                                             | 1.588                                                                          |
| $\mu$ [mm <sup>-1</sup> ]                         | 3.703                                                             | 1.606                                                             | 5.950                                                                         | 3.474                                                             | 4.194                                                                          |
| <i>F</i> (000)                                    | 3488                                                              | 800                                                               | 2320                                                                          | 832                                                               | 760                                                                            |
| Crystal size [mm <sup>3</sup> ]                   | 0.1×0.2×0.2                                                       | 0.15×0.2×0.25                                                     | 0.081×0.109×0.139                                                             | 0.073×0.172×0.268                                                 | 0.05×0.1×0.1                                                                   |
| Crystal colour                                    | clear light colourless                                            | clear light colourless                                            | clear light colourless                                                        | clear light colourless                                            | clear light colourless                                                         |
| Crystal shape                                     | block                                                             | prism                                                             | block                                                                         | plate                                                             | needle                                                                         |
| Radiation                                         | MoK $\alpha$ ( $\lambda=0.71073$ Å)                               | MoK $\alpha$ ( $\lambda=0.71073$ Å)                               | MoK $\alpha$ ( $\lambda=0.71073$ Å)                                           | MoK $\alpha$ ( $\lambda=0.71073$ Å)                               | MoK $\alpha$ ( $\lambda=0.71073$ Å)                                            |
| 2 $\theta$ range [°]                              | 4.28 to 50.00 (0.84 Å)                                            | 5.77 to 55.00 (0.77 Å)                                            | 4.29 to 55.00 (0.77 Å)                                                        | 4.40 to 54.99 (0.77 Å)                                            | 4.69 to 55.06 (0.77 Å)                                                         |
| Index ranges                                      | -36 ≤ <i>h</i> ≤ 36<br>-11 ≤ <i>k</i> ≤ 11<br>-27 ≤ <i>l</i> ≤ 17 | -14 ≤ <i>h</i> ≤ 14<br>-12 ≤ <i>k</i> ≤ 12<br>-16 ≤ <i>l</i> ≤ 22 | -12 ≤ <i>h</i> ≤ 12<br>-24 ≤ <i>k</i> ≤ 24<br>-25 ≤ <i>l</i> ≤ 23             | -14 ≤ <i>h</i> ≤ 14<br>-21 ≤ <i>k</i> ≤ 20<br>-11 ≤ <i>l</i> ≤ 11 | -11 ≤ <i>h</i> ≤ 10<br>-20 ≤ <i>k</i> ≤ 19<br>-12 ≤ <i>l</i> ≤ 14              |
| Reflections collected                             | 18548                                                             | 33599                                                             | 32078                                                                         | 25701                                                             | 11046                                                                          |
| Independent reflections                           | 6118<br>$R_{\text{int}} = 0.0301$<br>$R_{\text{sigma}} = 0.0556$  | 4063<br>$R_{\text{int}} = 0.0343$<br>$R_{\text{sigma}} = 0.0192$  | 8319<br>$R_{\text{int}} = 0.0437$<br>$R_{\text{sigma}} = 0.0395$              | 3733<br>$R_{\text{int}} = 0.0252$<br>$R_{\text{sigma}} = 0.0155$  | 6598<br>$R_{\text{int}} = 0.0465$<br>$R_{\text{sigma}} = 0.1257$               |
| Completeness to $\theta = 25(1)^\circ$            | 97.7 %                                                            | 99.9 %                                                            | 99.9 %                                                                        | 99.9 %                                                            | 99.6 %                                                                         |
| Data / Restraints / Parameters                    | 6118 / 0 / 362                                                    | 4063 / 0 / 181                                                    | 8319 / 0 / 338                                                                | 3733 / 0 / 151                                                    | 6598 / 1 / 278                                                                 |
| Goodness-of-fit on $F^2$                          | 0.890                                                             | 1.046                                                             | 1.064                                                                         | 1.079                                                             | 0.974                                                                          |
| Final <i>R</i> indexes<br>[ $I \geq 2\sigma(I)$ ] | $R_1 = 0.0301$<br>$wR_2 = 0.0636$                                 | $R_1 = 0.0196$<br>$wR_2 = 0.0445$                                 | $R_1 = 0.0296$<br>$wR_2 = 0.0720$                                             | $R_1 = 0.0176$<br>$wR_2 = 0.0430$                                 | $R_1 = 0.0538$<br>$wR_2 = 0.0609$                                              |
| Final <i>R</i> indexes<br>[all data]              | $R_1 = 0.0483$<br>$wR_2 = 0.0653$                                 | $R_1 = 0.0265$<br>$wR_2 = 0.0472$                                 | $R_1 = 0.0314$<br>$wR_2 = 0.0732$                                             | $R_1 = 0.0190$<br>$wR_2 = 0.0438$                                 | $R_1 = 0.0964$<br>$wR_2 = 0.0694$                                              |
| Largest peak/hole [eÅ <sup>-3</sup> ]             | 1.22/-0.67                                                        | 0.31/-0.23                                                        | 2.08/-1.36<br>-0.02(2)                                                        | 1.29/-0.39                                                        | 0.75/-0.77<br>0.437(14)                                                        |

**Table S5** Crystal data, data collection, and structure refinement for **CP8, CP9, CP10 and CP11**.

| Internal Reference                                     | CP8                                                                            | CP9                                                                            | CP10                                                                           | CP11                                                                           |
|--------------------------------------------------------|--------------------------------------------------------------------------------|--------------------------------------------------------------------------------|--------------------------------------------------------------------------------|--------------------------------------------------------------------------------|
| CCDC number                                            | 2326264                                                                        | 2326265                                                                        | 2326266                                                                        | 2326267                                                                        |
| Empirical formula                                      | C <sub>12</sub> H <sub>22</sub> ClCuS <sub>2</sub>                             | C <sub>8</sub> H <sub>14</sub> Br <sub>2</sub> CuNS                            | C <sub>12</sub> H <sub>22</sub> Br <sub>2</sub> CuS <sub>2</sub>               | C <sub>12</sub> H <sub>22</sub> Cl <sub>2</sub> CuS <sub>2</sub>               |
| Formula weight                                         | 329.40                                                                         | 379.62                                                                         | 453.77                                                                         | 364.85                                                                         |
| Temperature [K]                                        | 100.0(1)                                                                       | 100.0(1)                                                                       | 100.0(1)                                                                       | 115.0(1)                                                                       |
| Crystal system                                         | monoclinic                                                                     | monoclinic                                                                     | triclinic                                                                      | triclinic                                                                      |
| Space group (number)                                   | <i>P</i> 2 <sub>1</sub> / <i>c</i> (14)                                        | <i>P</i> 2 <sub>1</sub> / <i>n</i> (14)                                        | <i>P</i> 1 (2)                                                                 | <i>P</i> 1 (2)                                                                 |
| <i>a</i> [Å]                                           | 12.0784(5)                                                                     | 8.1661(4)                                                                      | 9.1382(11)                                                                     | 8.7545(14)                                                                     |
| <i>b</i> [Å]                                           | 9.6471(4)                                                                      | 10.2416(5)                                                                     | 9.9911(8)                                                                      | 10.0042(15)                                                                    |
| <i>c</i> [Å]                                           | 13.6377(5)                                                                     | 15.1301(6)                                                                     | 11.2700(10)                                                                    | 11.2498(15)                                                                    |
| α [°]                                                  | 90                                                                             | 90                                                                             | 65.156(4)                                                                      | 64.220(6)                                                                      |
| β [°]                                                  | 107.3257(12)                                                                   | 98.034(2)                                                                      | 70.131(4)                                                                      | 70.764(6)                                                                      |
| γ [°]                                                  | 90                                                                             | 90                                                                             | 84.401(5)                                                                      | 82.779(7)                                                                      |
| Volume [Å <sup>3</sup> ]                               | 1516.98(11)                                                                    | 1252.97(10)                                                                    | 876.92(15)                                                                     | 837.5(2)                                                                       |
| <i>Z</i>                                               | 4                                                                              | 4                                                                              | 2                                                                              | 2                                                                              |
| ρ <sub>calc</sub> [gcm <sup>-3</sup> ]                 | 1.442                                                                          | 2.012                                                                          | 1.719                                                                          | 1.447                                                                          |
| μ [mm <sup>-1</sup> ]                                  | 1.865                                                                          | 8.247                                                                          | 6.020                                                                          | 1.851                                                                          |
| <i>F</i> (000)                                         | 688                                                                            | 736                                                                            | 450                                                                            | 378                                                                            |
| Crystal size [mm <sup>3</sup> ]                        | 0.16×0.18×0.32                                                                 | 0.192×0.334×0.436                                                              | 0.138×0.263×0.508                                                              | 0.1×0.15×0.2                                                                   |
| Crystal colour                                         | clear light colourless                                                         | clear light colourless                                                         | clear light colourless                                                         | clear light colourless                                                         |
| Crystal shape                                          | prism                                                                          | block                                                                          | plate                                                                          | prism                                                                          |
| Radiation                                              | Mo <i>K</i> <sub>α</sub> (λ=0.71073 Å)                                         |
| 2θ range [°]                                           | 5.79 to 55.04 (0.77 Å)                                                         | 4.82 to 55.00 (0.77 Å)                                                         | 4.22 to 55.00 (0.77 Å)                                                         | 6.62 to 55.35 (0.77 Å)                                                         |
| Index ranges                                           | -15 ≤ <i>h</i> ≤ 15<br>-12 ≤ <i>k</i> ≤ 12<br>-17 ≤ <i>l</i> ≤ 17              | -9 ≤ <i>h</i> ≤ 10<br>-10 ≤ <i>k</i> ≤ 13<br>-19 ≤ <i>l</i> ≤ 19               | -11 ≤ <i>h</i> ≤ 11<br>-12 ≤ <i>k</i> ≤ 12<br>-14 ≤ <i>l</i> ≤ 14              | -11 ≤ <i>h</i> ≤ 11<br>-13 ≤ <i>k</i> ≤ 12<br>-14 ≤ <i>l</i> ≤ 14              |
| Reflections collected                                  | 43880                                                                          | 10454                                                                          | 33300                                                                          | 27840                                                                          |
| Independent reflections                                | 3493<br><i>R</i> <sub>int</sub> = 0.0497<br><i>R</i> <sub>sigma</sub> = 0.0189 | 2860<br><i>R</i> <sub>int</sub> = 0.0354<br><i>R</i> <sub>sigma</sub> = 0.0369 | 4027<br><i>R</i> <sub>int</sub> = 0.0286<br><i>R</i> <sub>sigma</sub> = 0.0154 | 3875<br><i>R</i> <sub>int</sub> = 0.0413<br><i>R</i> <sub>sigma</sub> = 0.0261 |
| Completeness to<br>θ = 25(1)°                          | 99.9 %                                                                         | 99.6 %                                                                         | 99.9 %                                                                         | 99.8 %                                                                         |
| Data / Restraints / Parameters                         | 3493 / 0 / 151                                                                 | 2860 / 0 / 122                                                                 | 4027 / 0 / 160                                                                 | 3875 / 0 / 160                                                                 |
| Goodness-of-fit on <i>F</i> <sup>2</sup>               | 1.077                                                                          | 1.062                                                                          | 1.048                                                                          | 1.063                                                                          |
| Final <i>R</i> indexes<br>[ <i>I</i> ≥ 2σ( <i>I</i> )] | <i>R</i> <sub>1</sub> = 0.0208<br>w <i>R</i> <sub>2</sub> = 0.0441             | <i>R</i> <sub>1</sub> = 0.0258<br>w <i>R</i> <sub>2</sub> = 0.0554             | <i>R</i> <sub>1</sub> = 0.0197<br>w <i>R</i> <sub>2</sub> = 0.0470             | <i>R</i> <sub>1</sub> = 0.0256<br>w <i>R</i> <sub>2</sub> = 0.0638             |
| Final <i>R</i> indexes<br>[all data]                   | <i>R</i> <sub>1</sub> = 0.0290<br>w <i>R</i> <sub>2</sub> = 0.0470             | <i>R</i> <sub>1</sub> = 0.0308<br>w <i>R</i> <sub>2</sub> = 0.0576             | <i>R</i> <sub>1</sub> = 0.0216<br>w <i>R</i> <sub>2</sub> = 0.0479             | <i>R</i> <sub>1</sub> = 0.0338<br>w <i>R</i> <sub>2</sub> = 0.0673             |
| Largest peak/hole [eÅ <sup>-3</sup> ]                  | 0.35/-0.25                                                                     | 0.54/-0.91                                                                     | 1.50/-0.80                                                                     | 0.43/-0.74                                                                     |

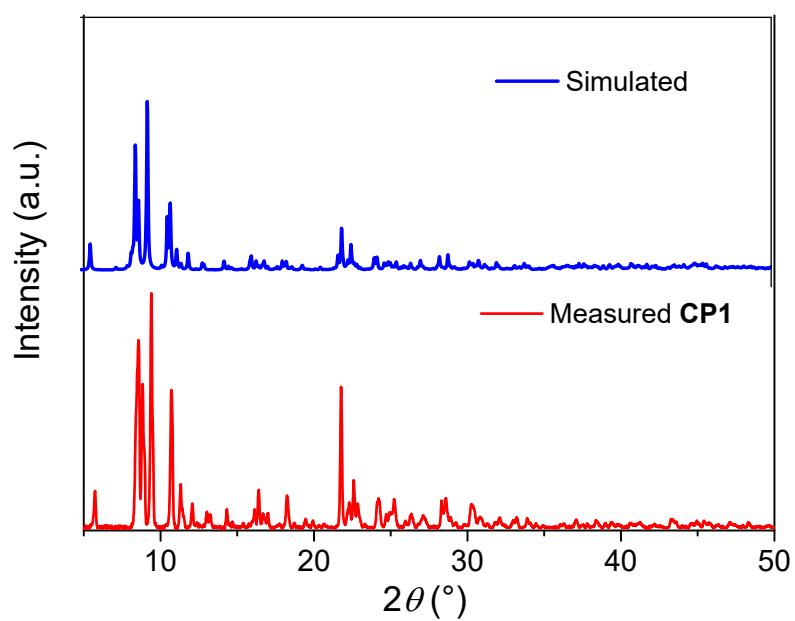

**Figure S8:** Experimental and simulated PXRD of CP1

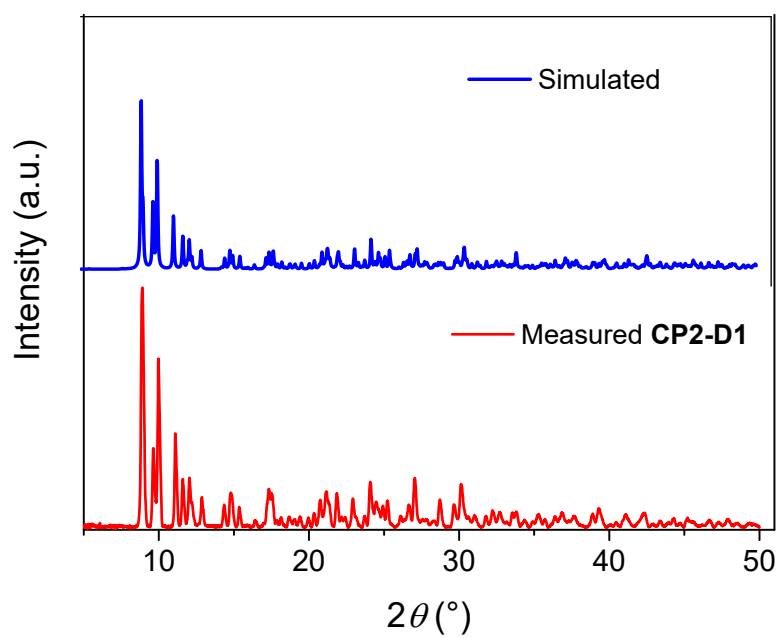

**Figure S9:** Experimental and simulated PXRD of CP2-D1

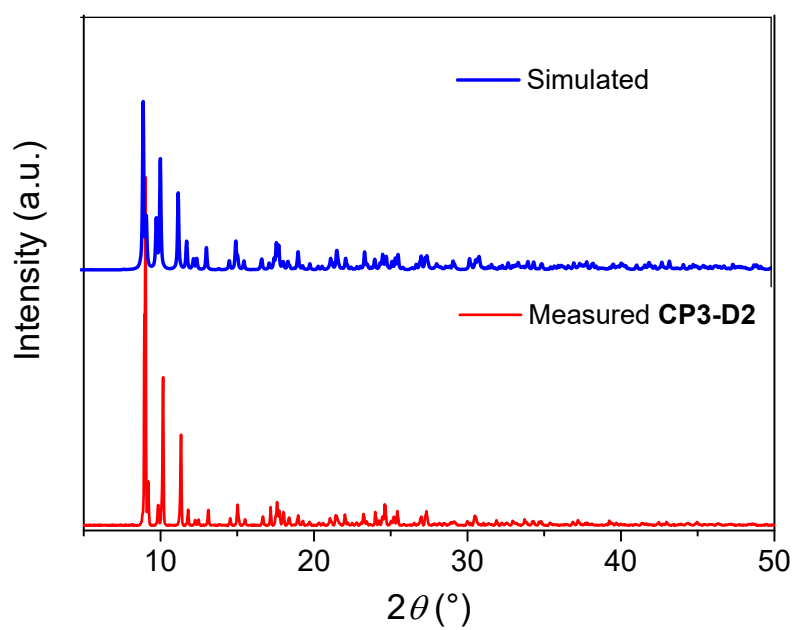

**Figure S10:** Experimental and simulated PXRD of CP3-D2

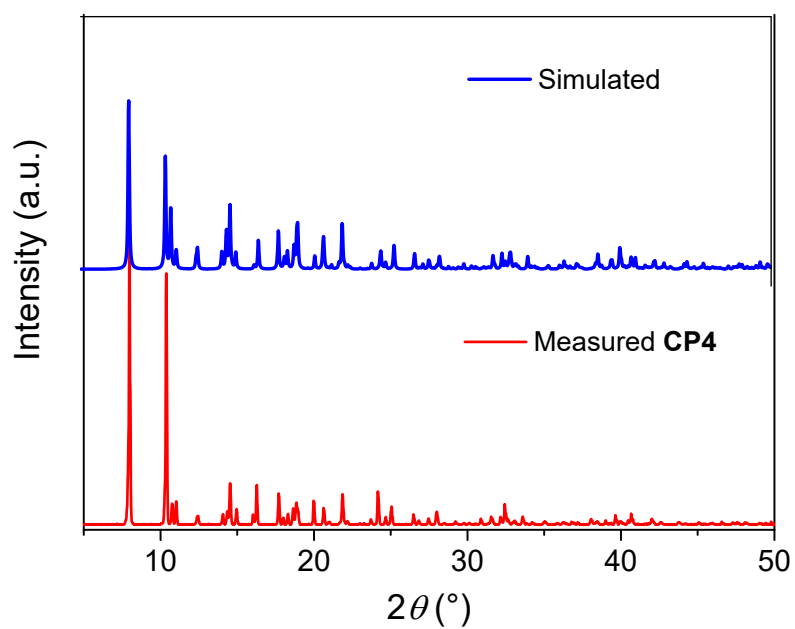

**Figure S11:** Experimental and simulated PXRD of CP4



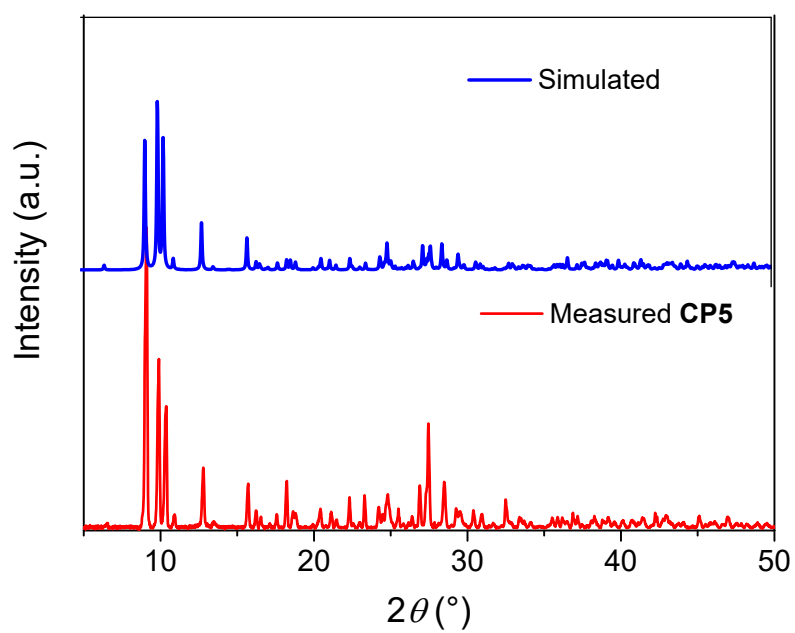

**Figure S12:** Experimental and simulated PXR D of CP5

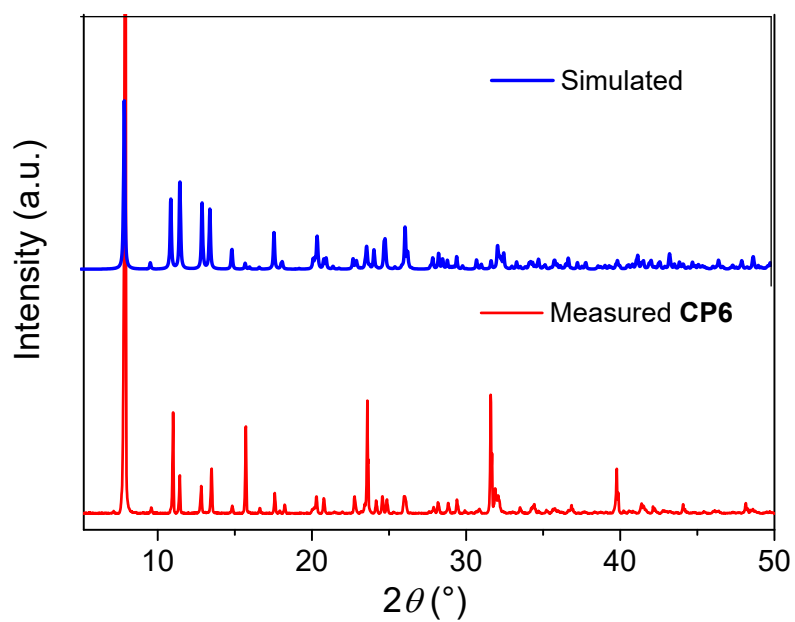

**Figure S13:** Experimental and simulated PXR D of CP6

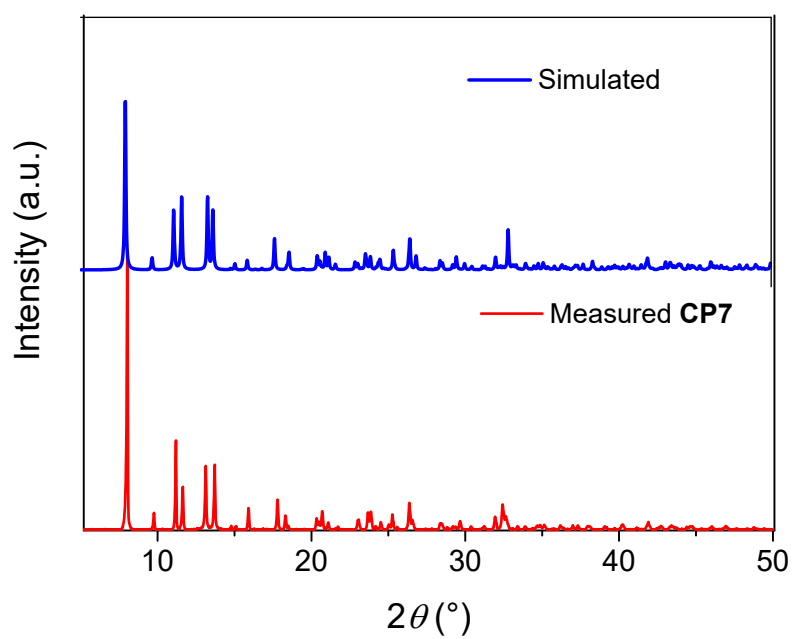

**Figure S14:** Experimental and simulated PXR D of CP7

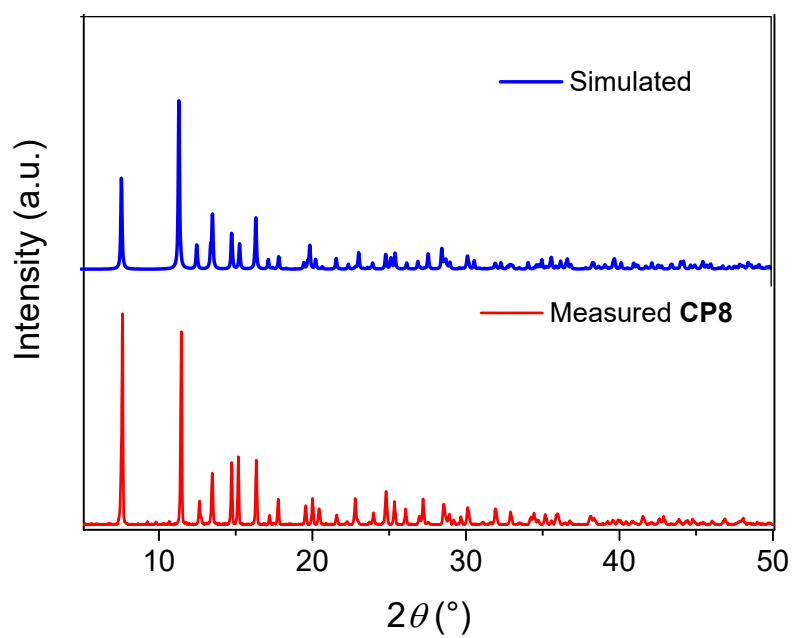

**Figure S15:** Experimental and simulated PXR D of CP8

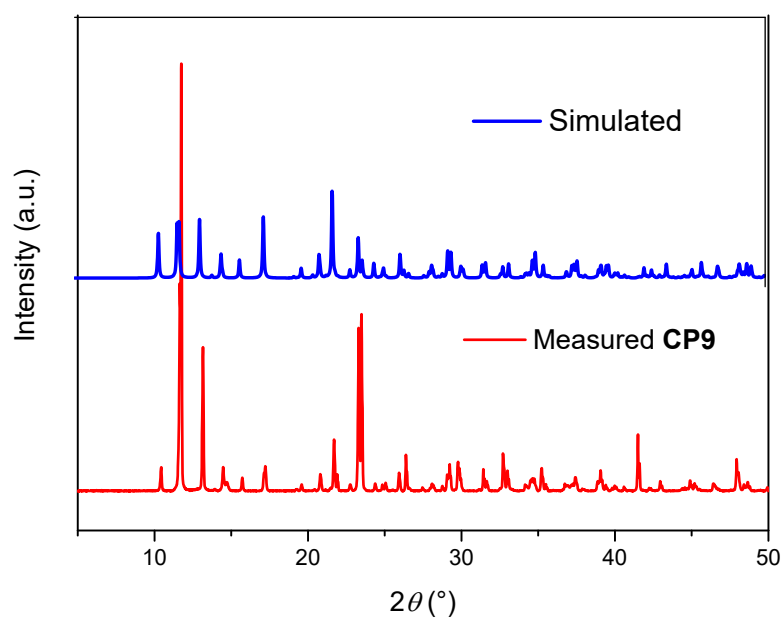

**Figure S16:** Experimental and simulated PXRD of CP9

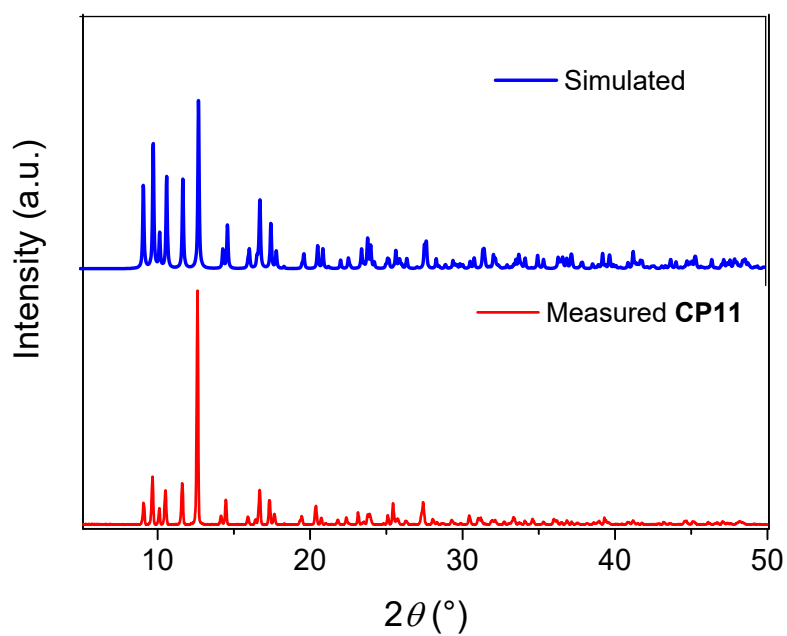

**Figure S17:** Experimental and simulated PXRD of CP11

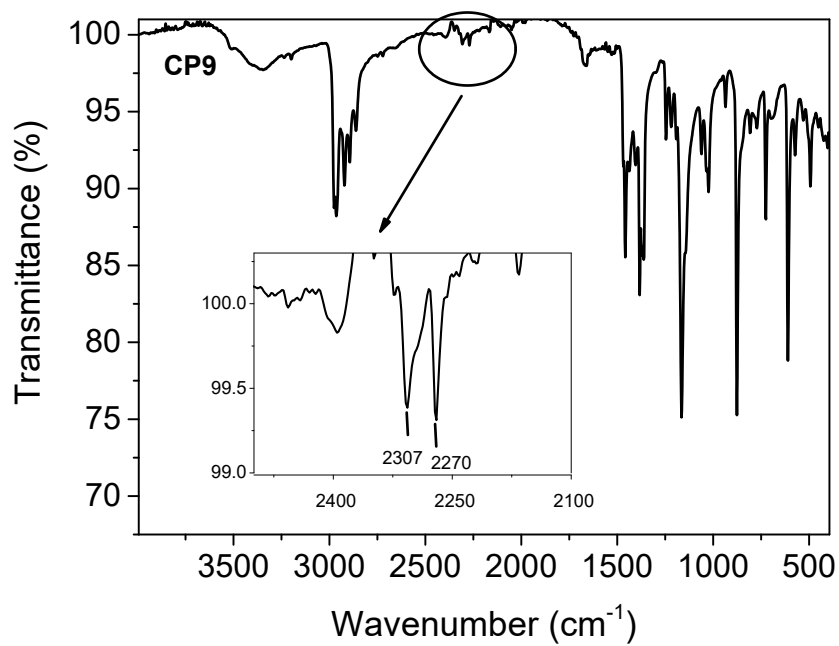

**Figure S18:** ATR-IR spectrum of CP9

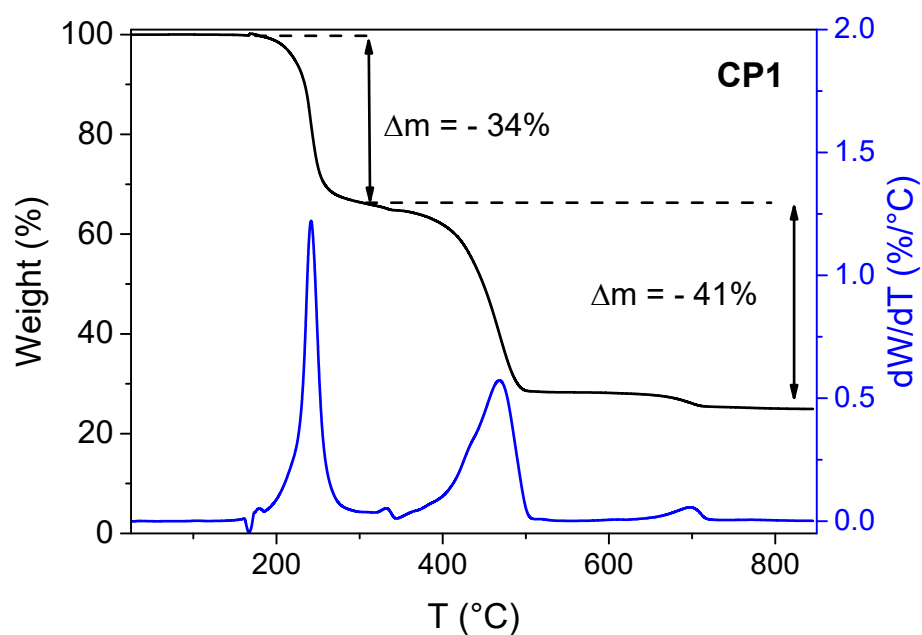

**Figure S19.** TGA traces and its first derivatives of CP1 under air flow.

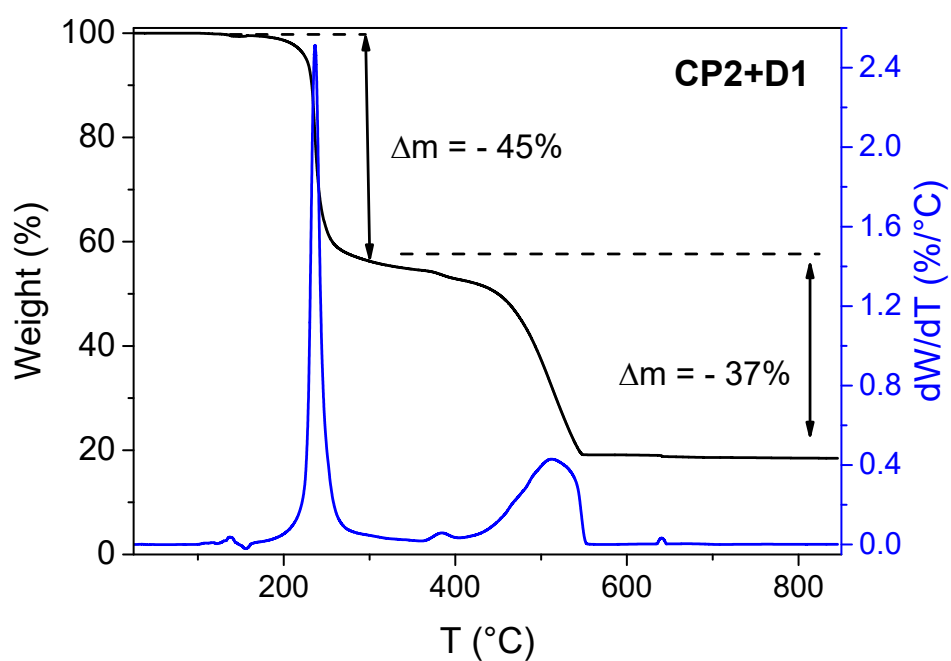

**Figure S20.** TGA traces and its first derivatives of CP2- D1 under air flow.

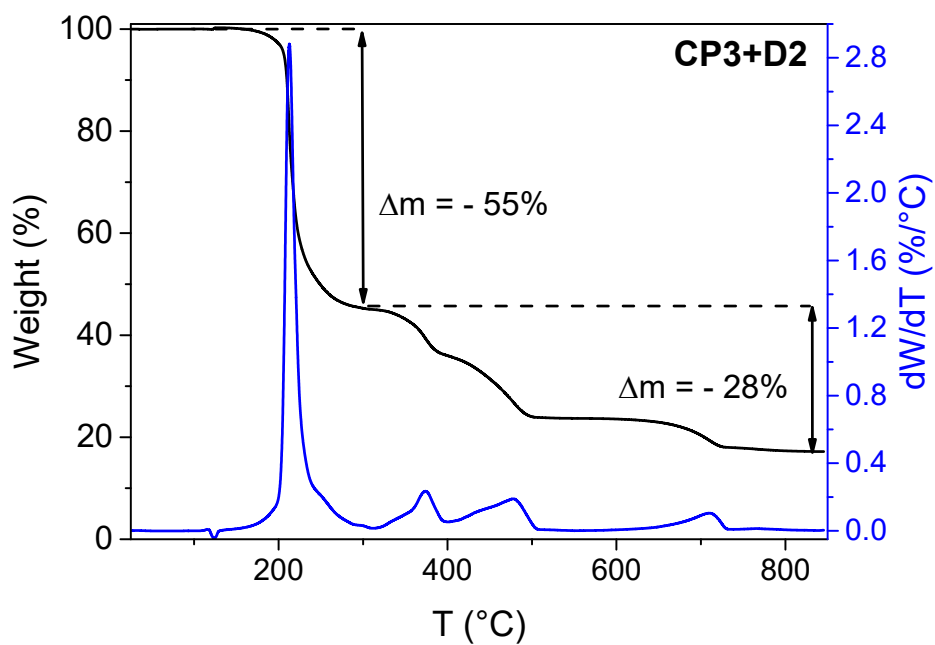

**Figure S21.** TGA traces and its first derivatives of CP3- D2 under air flow.



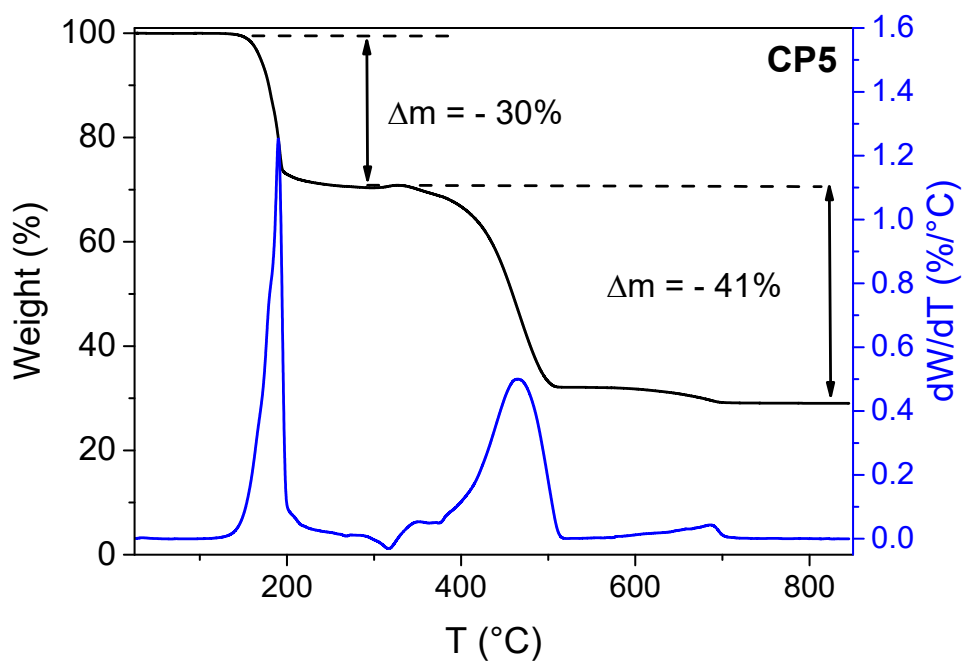

**Figure S22.** TGA traces and its first derivatives of **CP5** under air flow.

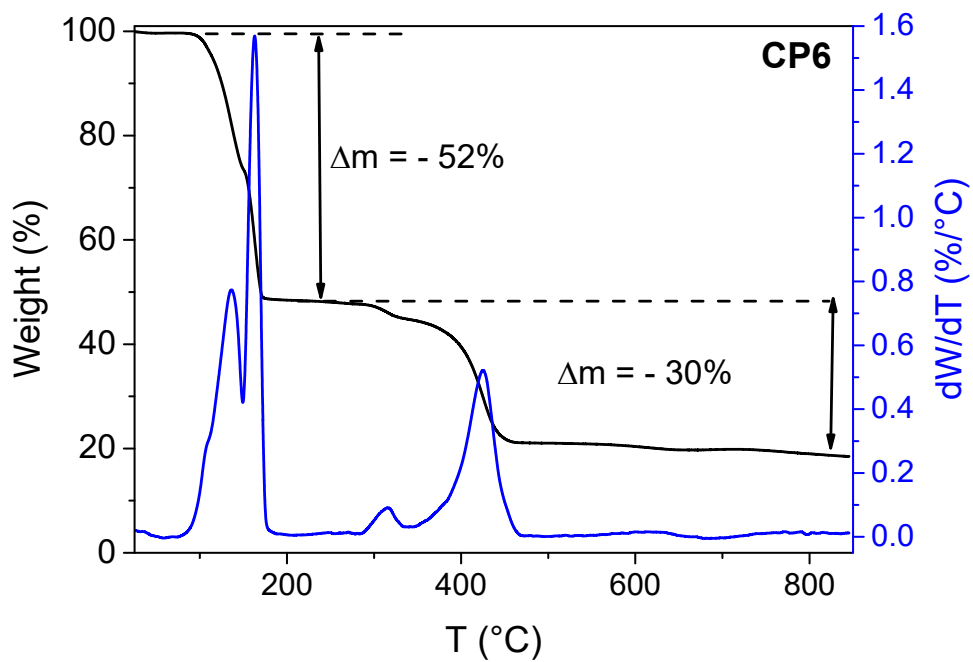

**Figure S23.** TGA trace and its first derivatives of **CP6** under air flow.

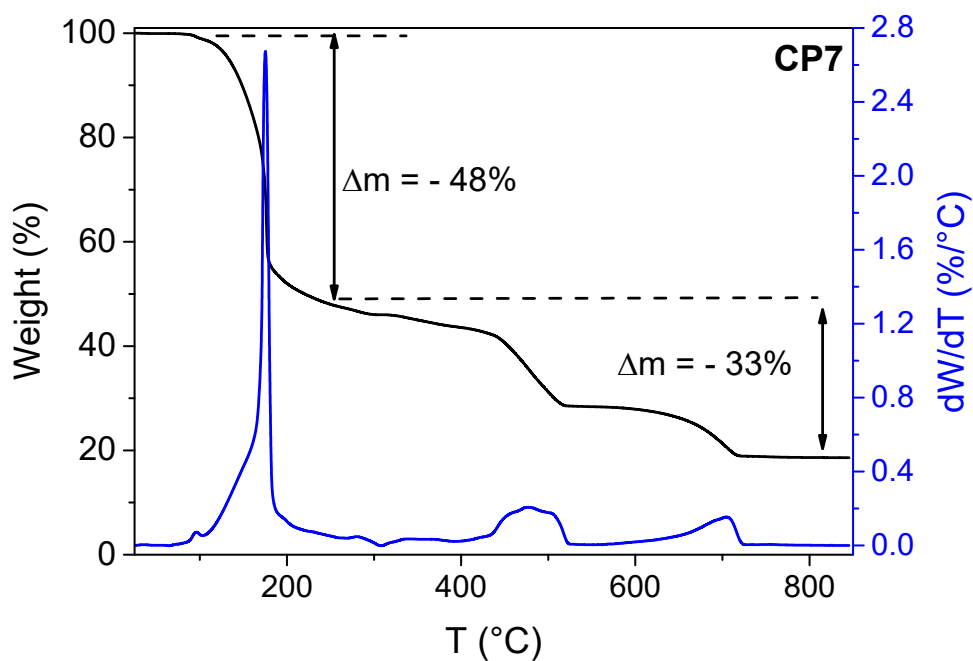

**Figure S24.** TGA trace and its first derivatives of **CP7** under air flow.

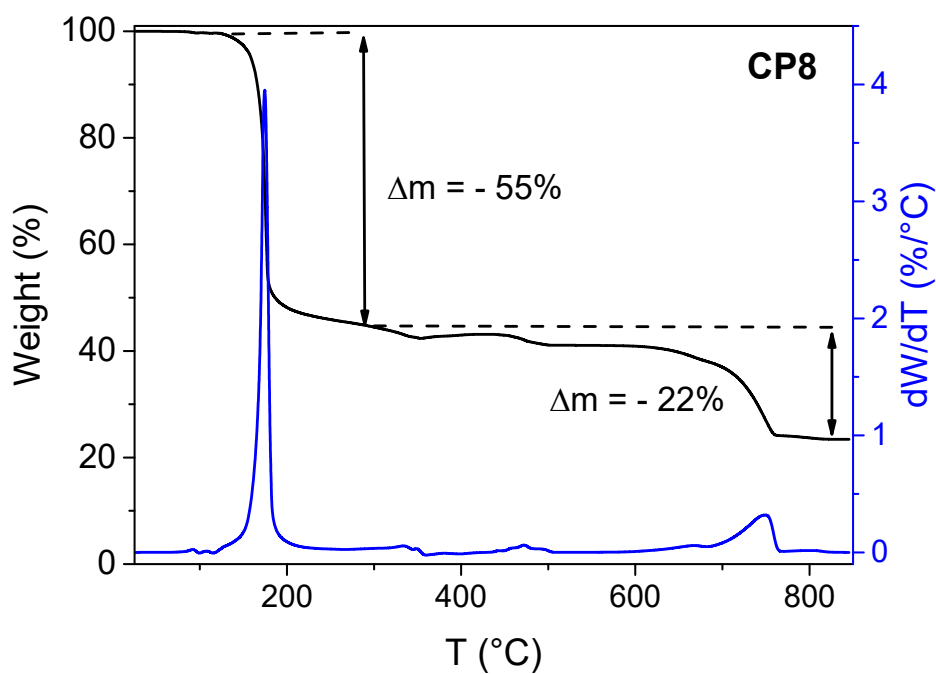

**Figure S25.** TGA trace and its first derivatives of **CP8** under air flow.

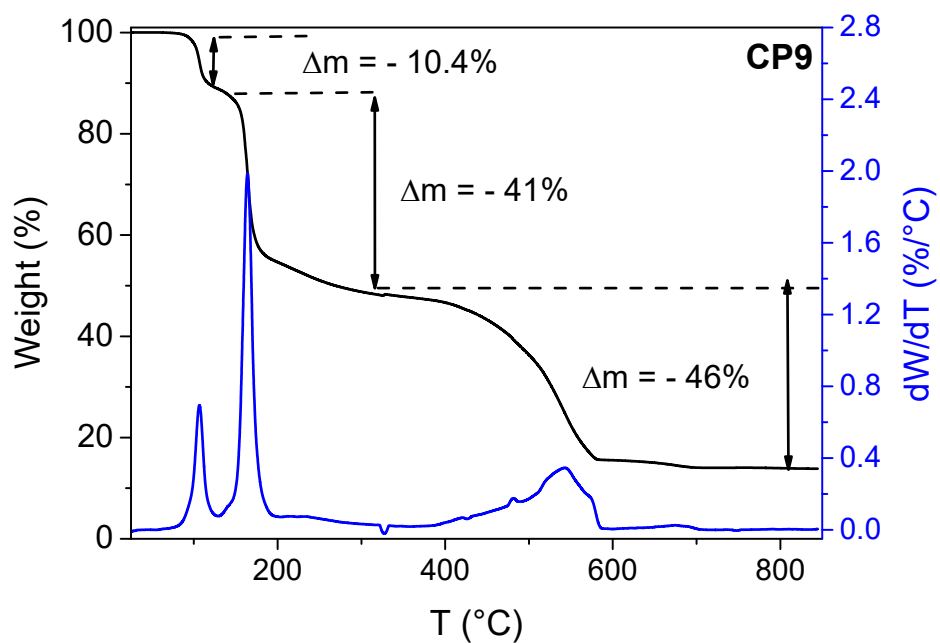

**Figure S26.** TGA trace and its first derivatives of CP9 under air flow.

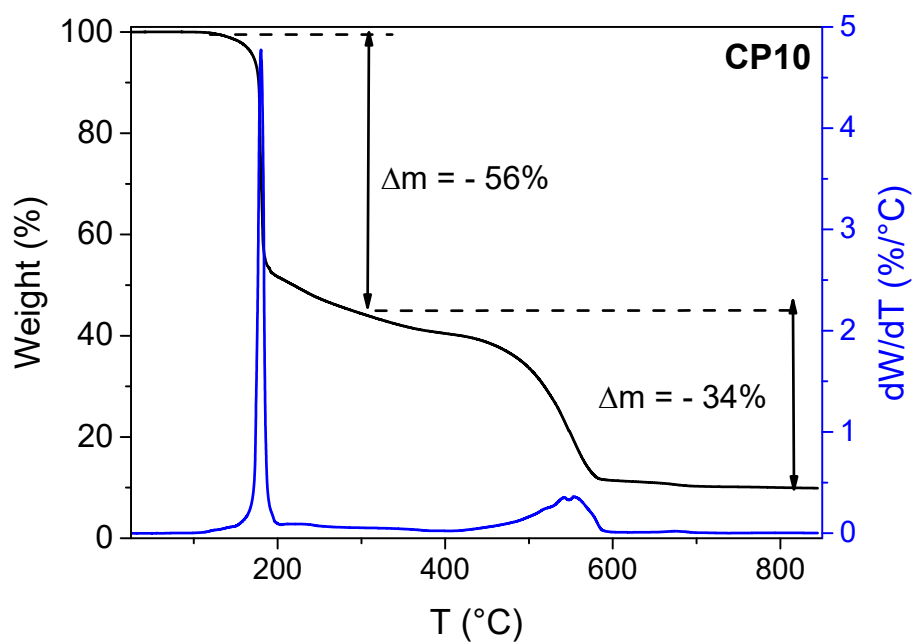

**Figure S27.** TGA trace and its first derivatives of CP10 under air flow.

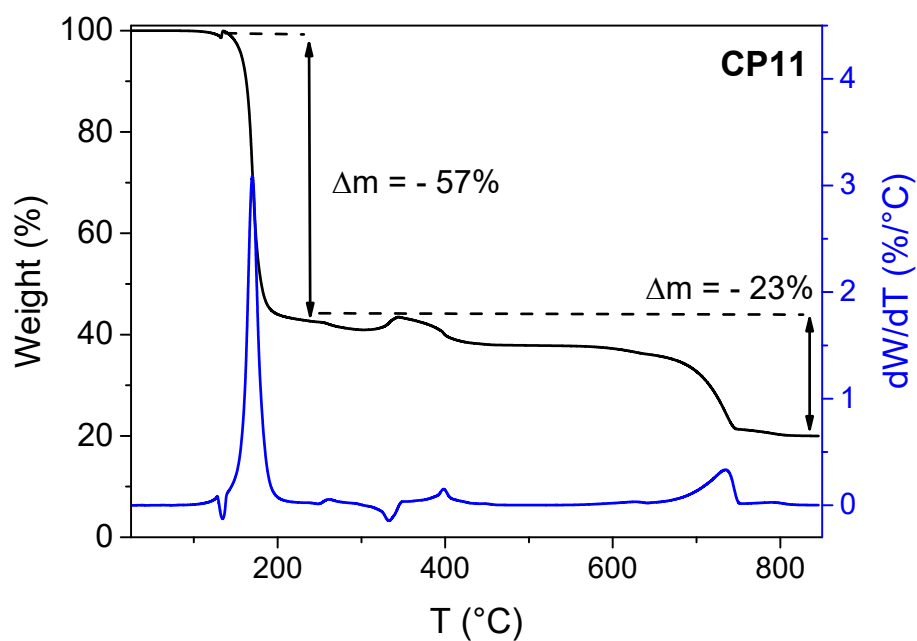

**Figure S28.** TGA trace and its first derivatives of **CP11** under air flow.

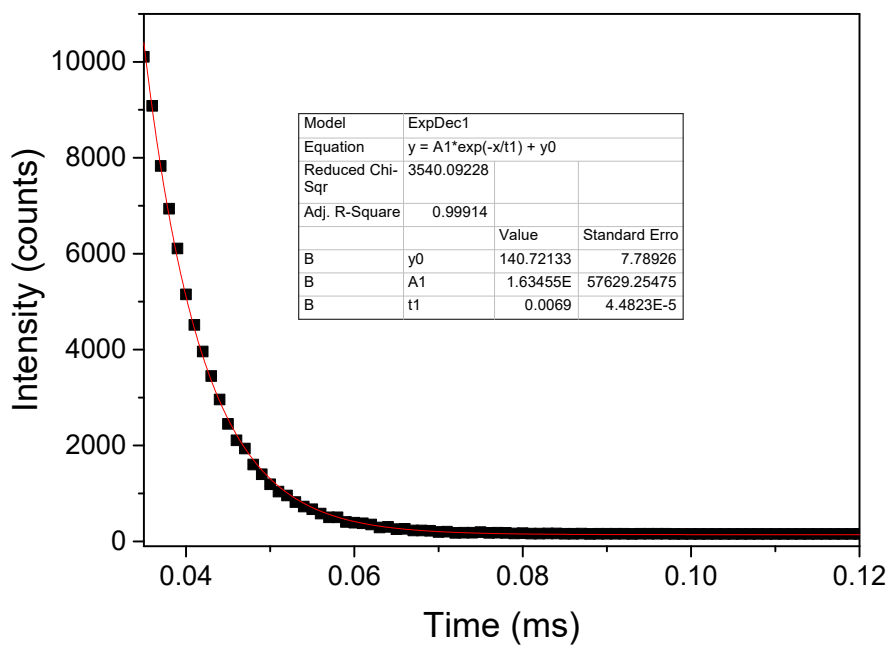

**Figure S29.** Solid-State Lifetime measurement of **CP1** (black) and the fitting curve (red) at 298K.

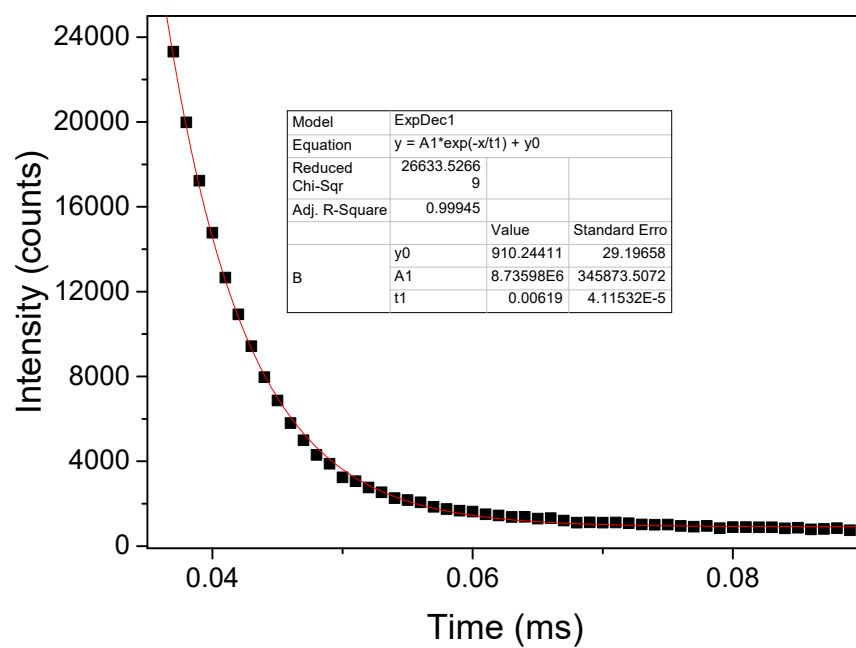

**Figure S30.** Solid-State Lifetime measurement of **CP5** (black) and the fitting curve (red) at 298K.

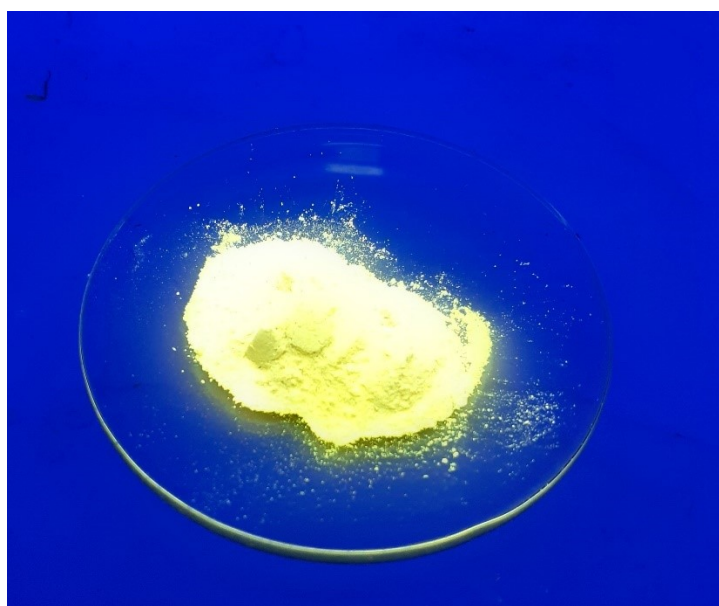

**Figure S31.** Yellow emission of **CP1** under UV light at 365 nm.



## Noncovalent interactions and selected AIM studies.

There are several noncovalent interatomic (NCI) contacts shorter than the sums of Van der Waals (VdW) radii in all structures reported in this article. They led to the building of 3D macromolecular networks. This VdW criterion of atomic interactions is purely based on metric parameters. Generally, these interactions, like all chemical interacting systems have electronic origins and include the hydrogen bonds, the  $\sigma$ -hole interactions like halogen, chalcogen, pnictogen and tetrel bonds,<sup>17, 18</sup> the different types of  $\pi$ - $\pi$ , X- $\pi$  or n- $\pi$  as well as the dipole-dipole (VdW) interactions. With a hope to detect a Cu $\cdots$ C $\equiv$ C triple bond interaction we focused our attention on those involving the alkyne spacer's triple bonds and Cu<sub>2</sub>X<sub>2</sub>S<sub>4</sub> cores. The significant interactions for different CPs are depicted in Figures S32 to S38. The C-H $\cdots\pi$  (C $\equiv$ C triple bond) interactions are present in the majority of coordination polymers except **CP5** and **CP9** in which all triple bonds are reduced to double bonds, **CP10** and **CP11** where half of triple bonds are reduced. The C-H donors for these interactions are provided by dithioether substituents (cyclohexyl, <sup>t</sup>Bu) or by CH<sub>2</sub> group of the SC<sub>4</sub>S spacer. The C-H $\cdots$ X hydrogen bonding is observed in all compounds. The isostructural 1D coordination polymers **CP2** and **CP3** are interesting because all types (except C-H $\cdots$ H-C) of noncovalent interactions are present therein (Fig. S33). This Figure also contains a case of not frequently encountered C-H $\cdots$ S hydrogen bond. Note that the C-H donor for this last interaction is not provided by CH<sub>2</sub> group of C<sub>4</sub> spacer bound to the S atom. The connectivity in this latter compound between 1D CP and 0D molecular dimer occurs *via* an original tetrel interaction C-H $\cdots$ C<sup>sp3</sup> which is shown on Figure S34. Independently, the **D1** (and also **D2**) molecules are interconnected by strong C-H $\cdots$ H-C interactions (Figure S35). We state that the metric criterion based on VdW radii did not allow us to find any Cu $\cdots\pi$  (C $\equiv$ C) interaction in neither compound.

Consequently, we turned our attention to the Quantum Theory of Atoms In Molecules<sup>19, 20</sup> and Natural Bond Orbitals.<sup>21</sup> The topological analysis of electron density based on the wave function is a powerful tool for the study of weak interatomic forces such as hydrogen bonding,<sup>22</sup>  $\sigma$ - $\pi$ , n- $\pi$  and  $\pi$ - $\pi$  interactions<sup>23-25</sup> as well for studying the nature of the metal-metal<sup>26-28</sup> and metal-ligand<sup>24</sup> interactions in addition to the classical case of covalent bonds. Various topological properties at *Bond Critical Points* (BCPs defined with (rank, signature) code (3,-1)) are used for these purposes.<sup>19, 20</sup> These topological parameters include the electronic charge density ( $\rho$ , e/ $\text{\AA}^3$ ), the Laplacian of electron density ( $\nabla^2\rho$ , e/ $\text{\AA}^5$ ), the local kinetic, potential and total energy densities (G, V and H, Ha/ $\text{\AA}^3$ ) as well as the derived quantities like the “bond

degree" ( $|H|/\rho$ , Ha/e<sup>-</sup>), and a dimensionless ratio  $|V|/G$  at the BCP. The integrations over atomic basins provide the useful information about atomic properties (e.g. charges ...) and bond orders through the calculation of delocalization indexes DI. Wiberg bond indexes, which are related to the bond orders, calculated with NBO analysis are complementary to the AIM results.

All chemical interacting systems are classified within the QT-AIM frame into three main types depending on the values of parameters mentioned above. These are the:

1 - shared-shared (SS), covalent,  $\nabla^2\rho < 0$ ,  $H < 0$  and  $|V|/G > 2$ ;

2 - shared-closed (SC), transit or intermediate,  $\nabla^2\rho > 0$ ,  $H < 0$  and  $1 < |V|/G < 2$ ;

3 - closed-closed (CC), ionic, noncovalent...,  $\nabla^2\rho > 0$ ,  $H < 0$  and  $|V|/G < 1$ .

We selected for the AIM analyses the significant fragments from the structures of **CP6**, **CP7**, **CP3** and **CP4** exhibiting the interactions mentioned above and containing both ligands **L1** and **L2** and all three halogens. The parameters got for **CP3** and **CP7** both bearing  $X = \text{Br}$  offer the opportunity to directly compare the influence of ligands **L1** and **L2**. The bond paths were calculated, and the molecular graphs plotted.

First, we note that no BCP for an Cu–Cu interaction is observed. Instead, the RCPs (ring critical points) placed at midpoints of the  $\text{Cu}_2\text{X}_2$  rhombi are present in all CPs. This confirms the discussions in the precedent part based on Cu–Cu distances. The S – C, C – C and C – H shared – shared covalent bonds (type 1 in classification above) present in the ligands are not discussed here. All other interactions have the positive values of Laplacian  $\nabla^2\rho$  and belong so to the types 2 and 3. Among them, the Cu – X and Cu – S with negative values of total energy density  $H$  are typical coordination bonds whereas all other interactions with positive  $H$  values are non-covalent ones.

The AIM electronic approach to the nature of weak interactions did not allow the detection of a  $\text{Cu}\cdots\pi(\text{C}\equiv\text{C})$  interaction. On the other hand, the electron density distribution in all CPs studied indicates the presence of BCPs, thus the occurrence of electronic interactions between one S atom with the triple  $\text{C}\equiv\text{C}$  bond of a neighbored ligand borne by another S atom. These interactions have topological parameters typical of the closed-closed systems and correspond from a crystal chemical point of view to  $n-\pi$  interactions.

The following interactions have been taken into account for each CP: Cu – X, Cu – S, CH – X, CH –  $\pi(\text{C}\equiv\text{C})$ , S –  $\pi(\text{C}\equiv\text{C})$  and S – H. The calculated topological parameters at BCPs are

gathered in Table S10. The molecular graphs built on bond paths are shown in Figures S40 and S41.

We comment first the bonding within the  $\text{Cu}_2\text{X}_2\text{S}_4$  cores. The covalent nature of the Cu – X bonds decreases, as expected, from X = I (**CP6**), through X = Br (**CP7** and **CP3**) to X = Cl (**CP4**). All topological parameters argue for. The total energy density H is most negative for **CP6** ( $-0.0815 \text{ Ha}/\text{\AA}^3$ ) and increases to  $-0.0455$  and  $-0.0479$  (**CP7** and **CP3**) and to  $-0.0415$  for **CP4**; the  $|H|/\rho$  ratio decreases in the same order  $0.25 \text{ Ha}/e^-$  **CP6** >  $0.14$  **CP7** and **CP3** >  $0.11$  **CP4**; the  $|V|/G$  ratio similarly decreases from 1.35 (for I) through 1.17 (for Br) to 1.11 (for Cl) and the  $\nabla^2\rho$  is less positive for **CP6** ( $2.96 e^-/\text{\AA}^5$ ) than for **CP7** and **CP3** (3.28) reaching 4.92 for **CP4**. The DI values decrease from I ( $0.465$ ) > Br ( $0.452$  and  $0.468$ ) > Cl ( $0.455$ ). However, the variations of DI's are very small. Finally, the Cu – I bonds are stronger than the Cu – Br ones which in turn are stronger than the Cu – Cl ones. Wiberg indexes related to the bond orders are in good agreement decreasing from 0.19 (I) to 0.17 (Br) and to 0.14 (Cl). Consequently, as it has been already suggested in the main text (page 24), the strengths of the Cu – S bonds should increase in an inverse order  $\text{I} < \text{Br} < \text{Cl}$ . It is confirmed by topological parameters: total energies H decrease  $-0.064$  (I),  $-0.068$  (Br),  $-0.070$  (Cl); DI  $0.52$  (I),  $0.54$  (Br),  $0.55$  (Cl). The values of Wiberg indexes of 0.18, 0.20 and 0.21, respectively, confirm the trend.

The properties of CH – X BCPs found for all calculated coordination polymers correspond well to those of closed – closed hydrogen bonds. There is no clear and regular tendency for estimation of the influence of X on their strengths. Note also that CH – S hydrogen bonds have been observed in **CP6** and **CP7** with R –  $t\text{Bu}$  but not in **CP3** and **CP4** where R =  $\text{C}_6\text{H}_6$ .

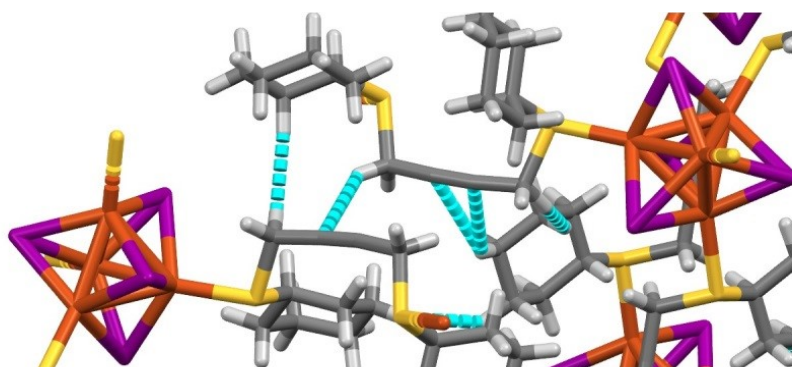

**Figure S32.** CP1: a fragment of the structure showing  $\text{C-H}\cdots\pi(\text{C}\equiv\text{C})$  and  $\text{C-H}\cdots\text{H-C}$  interactions between the neighbored spacers.

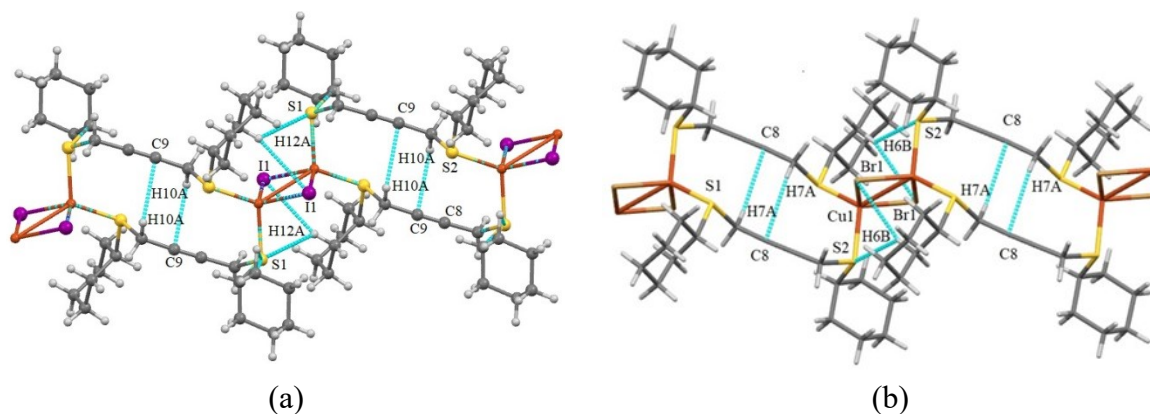

**Figure S33.** C-H $\cdots$  $\pi$ , C-H $\cdots$ X and C-H $\cdots$ S interactions in isostructural **CP2** (a) and **CP3** (b). Interatomic distances ( $\text{\AA}$ ) together with their shortening ( $\text{\AA}$ ) relative to the sum of Van der Waals radii: **CP2**: C9 $\cdots$ H10A 2.663 (-0.178), I1 $\cdots$ H12A 3.087 (-0.093) and S1 $\cdots$ H12A 2.958 (-0.042); **CP3**: C8 $\cdots$ H7A 2.742 (-0.158), Br1 $\cdots$ H6B 2.965 (-0.085) and S2 $\cdots$ H6B 2.936 (-0.064).

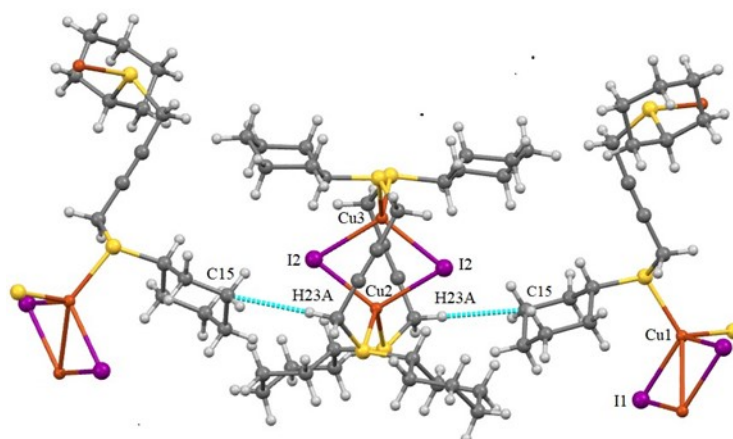

**Figure S34.** **CP2/D1**: C-H $\cdots$ C tetrel interaction connecting **CP2** and dinuclear discrete **D1**. H23A- C15 2.832  $\text{\AA}$ , -0.068 $\text{\AA}$  with respect to the sum of the VdW radii.

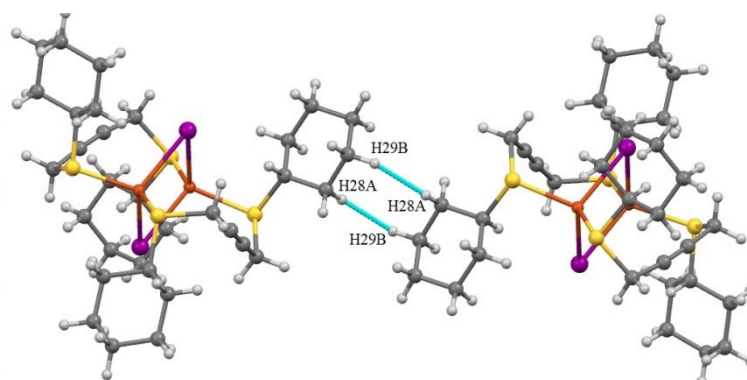

**Figure S35.** **CP2/D1**: C-H $\cdots$ H-C interactions connecting two **D1** molecules. H $\cdots$ H distance 2.252 (-0.148)  $\text{\AA}$ .

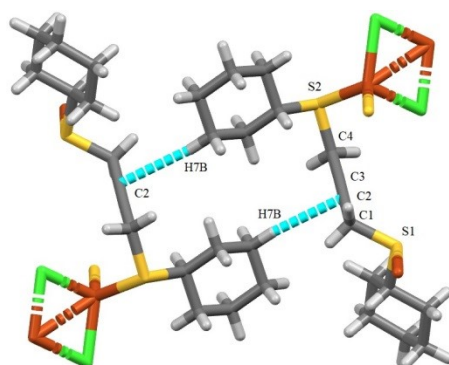

**Figure S36.** C-H $\cdots\pi$  interactions in CP4.

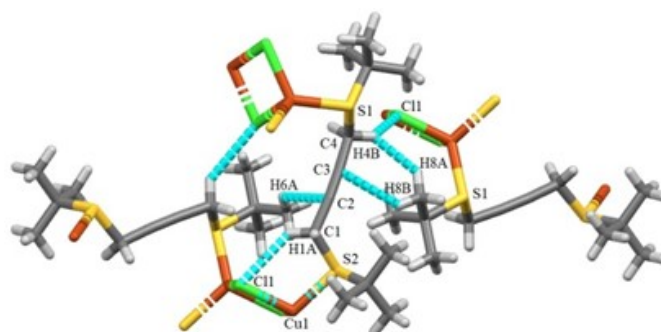

**Figure S37.** CP8: C-H $\cdots\pi$ (C $\equiv$ C), C-H $\cdots$ Cl and C-H $\cdots$ H-C interactions present in the crystal structure of CP8. Interatomic distances ( $\text{\AA}$ ) together with their shortening ( $\text{\AA}$ ) relative to the sum of Van der Waals radii: C2 $\cdots$ H6A 2.793 (-0.107), C3 $\cdots$ H8B 2.826 (-0.074), C11 $\cdots$ H1A 2.736 (-0.214), C11 $\cdots$ H4B 2.946 (-0.004), H4B $\cdots$ H8A 2.318 (-0.082).

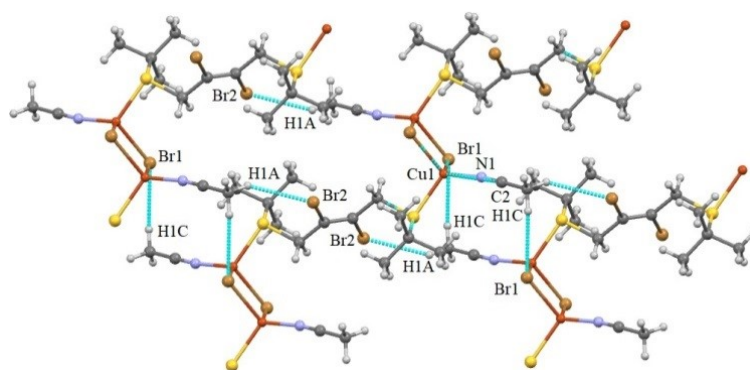

**Figure S38.** CP9: Br1 $\cdots$ H1C 3.018(-0.032)  $\text{\AA}$ , Br2 $\cdots$ H1A 2.953(-0.097)  $\text{\AA}$ .

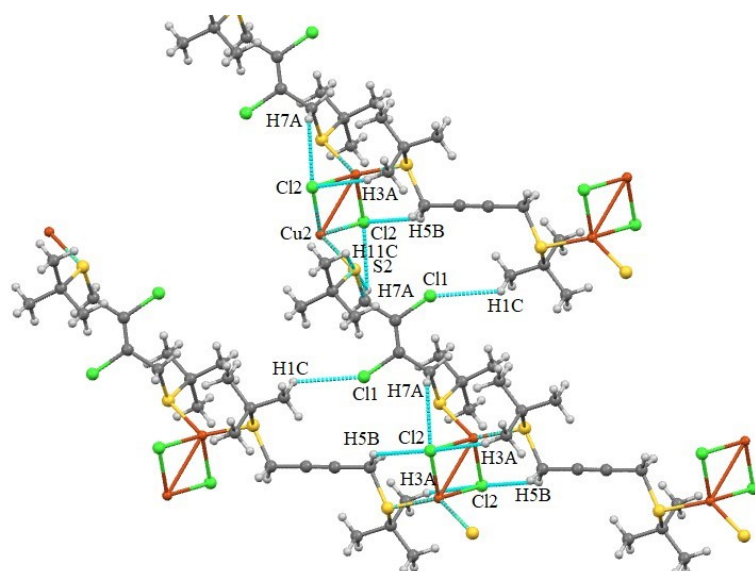

**Figure S39. CP11:** C-H $\cdots$ Cl and C-H $\cdots$ H-C interactions present in the crystal structure of **CP11**. Interatomic distances (Å) together with their shortening (Å) relative to the sum of the Van der Waals radii: Cl1 $\cdots$ H1C 2.882 (-0.068), Cl2 $\cdots$ H3A 2.745 (-0.205), Cl2 $\cdots$ H5B 2.776 (-0.174), Cl2 $\cdots$ H7A 2.849 (-0.101).

**Table S6.** Topological properties of bond critical points (mean values); d (distance),  $\rho$  (electron density),  $\nabla^2\rho$  (Laplacian of  $\rho$ ), H (total energy density), V potential energy density, G kinetic energy density, DI (delocalization index), Wiberg (bond index from NBO analysis).

| Interaction                        | d (Å) | $\rho$ ( $e/\text{Å}^3$ ) | $\nabla^2\rho$ ( $e/\text{Å}^5$ ) | H ( $\text{Ha}/\text{Å}^3$ ) | $ H /\rho$ ( $\text{Ha}/e$ ) | $ V /G$ | DI    | Wiberg |
|------------------------------------|-------|---------------------------|-----------------------------------|------------------------------|------------------------------|---------|-------|--------|
| Cu – X                             |       |                           |                                   |                              |                              |         |       |        |
| <b>CP6</b> X=I                     | 2.654 | 0.3309                    | 2.96                              | -0.0815                      | 0.246                        | 1.348   | 0.465 | 0.186  |
| <b>CP7</b> X=Br                    | 2.509 | 0.3208                    | 3.28                              | -0.0455                      | 0.140                        | 1.164   | 0.452 | 0.166  |
| <b>CP3</b> X=Br                    | 2.490 | 0.3329                    | 3.28                              | -0.0479                      | 0.144                        | 1.174   | 0.468 | 0.177  |
| <b>CP4</b> X=Cl                    | 2.358 | 0.3791                    | 4.92                              | -0.0415                      | 0.110                        | 1.109   | 0.455 | 0.140  |
| Cu – S                             |       |                           |                                   |                              |                              |         |       |        |
| <b>CP6</b> X=I                     | 2.341 | 0.432                     | 5.28                              | -0.0637                      | 0.147                        | 1.147   | 0.522 | 0.186  |
| <b>CP7</b> X=Br                    | 2.321 | 0.446                     | 5.59                              | -0.0652                      | 0.151                        | 1.144   | 0.542 | 0.201  |
| <b>CP3</b> X=Br                    | 2.304 | 0.466                     | 5.88                              | -0.0710                      | 0.152                        | 1.146   | 0.545 | 0.207  |
| <b>CP4</b> X=Cl                    | 2.306 | 0.464                     | 5.86                              | -0.0700                      | 0.151                        | 1.146   | 0.553 | 0.210  |
| CH – X                             |       |                           |                                   |                              |                              |         |       |        |
| <b>CP6</b> (4a)                    | 3.205 | 0.044                     | 0.542                             | +0.0095                      | 0.199                        | 0.702   | c     | 0.004  |
| <b>CP7</b> (8a)                    | 3.142 | 0.043                     | 0.438                             | +0.0047                      | 0.124                        | 0.798   | c     | 0.006  |
| <b>CP3</b> (4a)                    | 3.140 | 0.042                     | 0.439                             | +0.0050                      | 0.124                        | 0.794   | c     | 0.004  |
| <b>CP4</b> (4a)                    | 2.852 | 0.053                     | 0.696                             | +0.0011                      | 0.197                        | 0.725   | c     | 0.002  |
| CH – $\pi(\text{C}\equiv\text{C})$ |       |                           |                                   |                              |                              |         |       |        |
| <b>CP6</b> (3a)                    | 2.746 | 0.045                     | 0.578                             | +0.0092                      | 0.201                        | 0.708   | c     | 0.002  |
| <b>CP7</b> (4a,b)                  | 2.766 | 0.046                     | 0.566                             | +0.0088                      | 0.193                        | 0.713   | c     | 0.001  |
| <b>CP3</b> (2a)                    | 2.742 | 0.045                     | 0.554                             | +0.0054                      | 0.155                        | 0.751   | c     | 0.002  |
| <b>CP4</b> (1a)                    | 2.836 | 0.051                     | 0.665                             | +0.0105                      | 0.207                        | 0.709   | c     | 0.002  |
| S – $\pi(\text{C}\equiv\text{C})$  |       |                           |                                   |                              |                              |         |       |        |
| <b>CP6</b> (1a)                    | 3.712 | 0.034                     | 0.342                             | +0.0051                      | 0.152                        | 0.729   | c     | 0.002  |
| <b>CP7</b> (3a)                    | 3.632 | 0.038                     | 0.400                             | +0.0060                      | 0.155                        | 0.730   | c     | 0.002  |
| <b>CP3</b> (1a)                    | 3.610 | 0.033                     | 0.369                             | +0.0054                      | 0.155                        | 0.751   | c     | 0.002  |
| <b>CP4</b> (1a)                    | 3.604 | 0.034                     | 0.366                             | +0.0055                      | 0.162                        | 0.726   | c     | 0.002  |



| S – H           |       |       |       |         |       |       |   |       |  |
|-----------------|-------|-------|-------|---------|-------|-------|---|-------|--|
| <b>CP6</b> (2a) | 3.173 | 0.031 | 0.366 | +0.0039 | 0.126 | 0.658 | c | 0.001 |  |
| <b>CP7</b> (3a) | 3.104 | 0.040 | 0.547 | +0.0037 | 0.093 | 0.675 | c | 0.002 |  |
| <b>CP3</b> (4a) |       |       |       |         |       | -     | c |       |  |
| <b>CP4</b> (4a) |       |       |       |         |       |       | c |       |  |

a number of interactions, b four other BCPs with long H...C distances (mean 3.262 Å) have been detected but are not included here, c not detected. DI indexes for non-covalent interactions were not calculated.

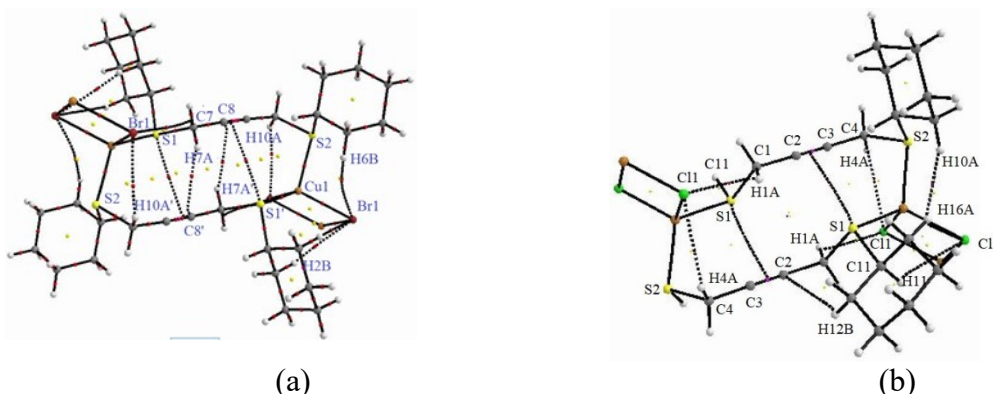

**Figure S40.** Molecular graphs showing the inter-ligand noncovalent interactions in 14 membered rings in the structures of (a) **CP3** and (b) **CP4**. **CP3**: S... $\pi$ (C $\equiv$ C), C-H... $\pi$ (C $\equiv$ C) and C-H...Br, **CP4**: S... $\pi$ (C $\equiv$ C) and C-H...Cl and exterior to the ring C-H...H-C bond paths.

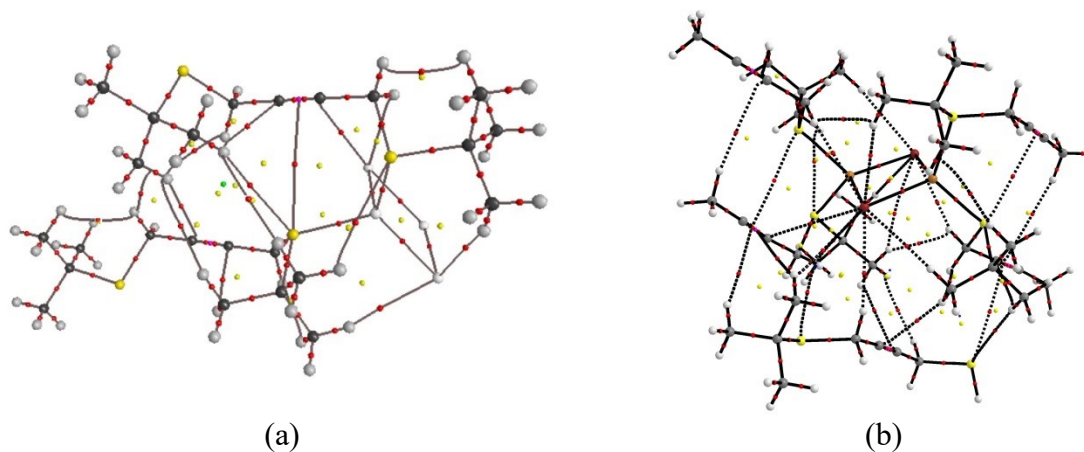

**Figure S41.** Molecular graphs of (a) **CP6** and (b) **CP7**. **CP6**: S... $\pi$ (C $\equiv$ C), C-H... $\pi$ (C $\equiv$ C) C-H...H-C C-H...S and C-H...I bond paths; **CP7**: S... $\pi$ (C $\equiv$ C), C-H... $\pi$ (C $\equiv$ C) and C-H...Br, C-H...S and C-H...H-C bond paths.

## X-ray data and experimental refinement

|                                                                            |    |
|----------------------------------------------------------------------------|----|
| .....                                                                      | 35 |
| Crystal structure of CP1_100K.....                                         | 35 |
| <i>Crystal Data and Experimental</i> .....                                 | 35 |
| <b>Table S7. Crystal data and structure refinement for CP1_100K</b> .....  | 35 |
| <b>Table S8 Bond lengths and angles for CP1_100K</b> .....                 | 36 |
| <b>Table S9 Torsion angles for CP1_100K</b> .....                          | 45 |
| .....                                                                      | 48 |
| Crystal structure of CP1_150K.....                                         | 48 |
| <i>Crystal Data and Experimental</i> .....                                 | 48 |
| <b>Table S10 Crystal data and structure refinement for CP1_150K</b> .....  | 48 |
| <b>Table S11 Bond lengths and angles for CP1_150K</b> .....                | 49 |
| <b>Table S12. Torsion angles for CP1_150K</b> .....                        | 58 |
| .....                                                                      | 60 |
| Crystal structure of CP1_200K.....                                         | 60 |
| <i>Crystal Data and Experimental</i> .....                                 | 60 |
| <b>Table S13. Crystal data and structure refinement for CP1_200K</b> ..... | 60 |
| <b>Table S14. Bond lengths and angles for CP1_200K</b> .....               | 61 |
| <b>Table S15. Torsion angles for CP1_200K</b> .....                        | 70 |
| .....                                                                      | 72 |
| Crystal structure of CP1_250K.....                                         | 72 |
| <i>Crystal Data and Experimental</i> .....                                 | 72 |
| <b>Table S16. Crystal data and structure refinement for CP1_250K</b> ..... | 72 |
| <b>Table S17. Bond lengths and angles for CP1_250K</b> .....               | 73 |
| <b>Table S18. Torsion angles for CP1_250K</b> .....                        | 82 |
| .....                                                                      | 84 |
| Crystal structure of CP1_300K.....                                         | 84 |
| <i>Crystal Data and Experimental</i> .....                                 | 84 |
| <b>Table S19. Crystal data and structure refinement for CP1_300K</b> ..... | 84 |
| <b>Table S20. Bond lengths and angles for CP1_300K</b> .....               | 85 |
| <b>Table S21. Torsion angles for CP1_300K</b> .....                        | 94 |
| .....                                                                      | 96 |
| Crystal structure of CP2D1_100K.....                                       | 96 |
| <i>Crystal Data and Experimental</i> .....                                 | 96 |



|                                                                       |     |
|-----------------------------------------------------------------------|-----|
| Table S22. Crystal data and structure refinement for CP2D1_100K ..... | 96  |
| Table S23. Bond lengths and angles for CP2D1_100K.....                | 97  |
| Table S24. Torsion angles for CP2D1_100K.....                         | 99  |
| .....                                                                 | 101 |
| Crystal structure of CP2D1_140K.....                                  | 101 |
| <i>Crystal Data and Experimental</i> .....                            | 101 |
| Table S25. Crystal data and structure refinement for CP2D1_140K ..... | 101 |
| Table S26. Bond lengths and angles for CP2D1_140K.....                | 102 |
| Table S27. Torsion angles for CP2D1_140K.....                         | 104 |
| .....                                                                 | 106 |
| Crystal structure of CP2D1_180K.....                                  | 106 |
| <i>Crystal Data and Experimental</i> .....                            | 106 |
| Table S28. Crystal data and structure refinement for CP2D1_180K ..... | 106 |
| Table S29. Bond lengths and angles for CP2D1_180K.....                | 107 |
| Table S30. Torsion angles for CP2D1_180K.....                         | 109 |
| .....                                                                 | 111 |
| Crystal structure of CP2D1_220K.....                                  | 111 |
| <i>Crystal Data and Experimental</i> .....                            | 111 |
| Table S31. Crystal data and structure refinement for CP2D1_220K ..... | 111 |
| Table S32. Bond lengths and angles for CP2D1_220K.....                | 112 |
| Table S33. Torsion angles for CP2D1_220K.....                         | 114 |
| .....                                                                 | 116 |
| Crystal structure of CP2D1_260K.....                                  | 116 |
| <i>Crystal Data and Experimental</i> .....                            | 116 |
| Table S34. Crystal data and structure refinement for CP2D1_260K ..... | 116 |
| Table S35. Bond lengths and angles for CP2D1_260K.....                | 117 |
| Table S36. Torsion angles for CP2D1_260K.....                         | 119 |
| .....                                                                 | 121 |
| Crystal structure of CP2D1_300k.....                                  | 121 |
| <i>Crystal Data and Experimental</i> .....                            | 121 |
| Table S37. Crystal data and structure refinement for CP2D1_300k ..... | 121 |
| Table S38. Bond lengths and angles for CP2D1_300k.....                | 122 |
| Table S39. Torsion angles for CP2D1_300k.....                         | 124 |
| .....                                                                 | 126 |
| Crystal structure of CP3D2 .....                                      | 126 |
| <i>Crystal Data and Experimental</i> .....                            | 126 |

|                                                                  |     |
|------------------------------------------------------------------|-----|
| Table S40. Crystal data and structure refinement for CP3D2 ..... | 126 |
| Table S41. Bond lengths and angles for CP3D2.....                | 127 |
| Table S42. Torsion angles for CP3D2.....                         | 129 |
| .....                                                            | 131 |
| Crystal structure of CP4.....                                    | 131 |
| <i>Crystal Data and Experimental</i> .....                       | 131 |
| Table S43. Crystal data and structure refinement for CP4 .....   | 131 |
| Table S44. Bond lengths and angles for CP4 .....                 | 132 |
| Table S45. Torsion angles for CP4.....                           | 133 |
| .....                                                            | 134 |
| Crystal structure of CP5.....                                    | 134 |
| <i>Crystal Data and Experimental</i> .....                       | 134 |
| Table S46. Crystal data and structure refinement for CP5 .....   | 134 |
| Refinement details for CP5.....                                  | 135 |
| Table S47. Bond lengths and angles for CP5 .....                 | 135 |
| Table S48. Torsion angles for CP5.....                           | 138 |
| .....                                                            | 139 |
| Crystal structure of CP6.....                                    | 139 |
| <i>Crystal Data and Experimental</i> .....                       | 139 |
| Table S49. Crystal data and structure refinement for CP6 .....   | 139 |
| Table S50. Bond lengths and angles for CP6 .....                 | 140 |
| Table S51. Torsion angles for CP6.....                           | 141 |
| .....                                                            | 142 |
| Crystal structure of CP7.....                                    | 142 |
| <i>Crystal Data and Experimental</i> .....                       | 142 |
| Table S52. Crystal data and structure refinement for CP7 .....   | 142 |
| Refinement details for CP7.....                                  | 143 |
| Table S53. Bond lengths and angles for CP7 .....                 | 143 |
| Table S54. Torsion angles for CP7.....                           | 145 |
| .....                                                            | 146 |
| Crystal structure of CP8.....                                    | 146 |
| <i>Crystal Data and Experimental</i> .....                       | 146 |
| Table S55. Crystal data and structure refinement for CP8 .....   | 146 |
| Table S56. Bond lengths and angles for CP8 .....                 | 147 |
| Table S57. Torsion angles for CP8.....                           | 148 |
| .....                                                            | 149 |

|                                                                        |     |
|------------------------------------------------------------------------|-----|
| <b>Crystal structure of CP9</b> .....                                  | 149 |
| <b><i>Crystal Data and Experimental</i></b> .....                      | 149 |
| <b>Table S58. Crystal data and structure refinement for CP9</b> .....  | 149 |
| <b>Table S59. Bond lengths and angles for CP9</b> .....                | 150 |
| <b>Table S60. Torsion angles for CP9</b> .....                         | 150 |
| .....                                                                  | 151 |
| <b>Crystal structure of CP10</b> .....                                 | 151 |
| <b><i>Crystal Data and Experimental</i></b> .....                      | 151 |
| <b>Table S61. Crystal data and structure refinement for CP10</b> ..... | 151 |
| <b>Table S62. Bond lengths and angles for CP10</b> .....               | 152 |
| <b>Table S63. Torsion angles for CP10</b> .....                        | 153 |
| .....                                                                  | 154 |
| <b>Crystal structure of CP11</b> .....                                 | 154 |
| <b><i>Crystal Data and Experimental</i></b> .....                      | 154 |
| <b>Table S64. Crystal data and structure refinement for CP11</b> ..... | 154 |
| <b>Table S65. Bond lengths and angles for CP11</b> .....               | 155 |
| <b>Table S66. Torsion angles for CP11</b> .....                        | 156 |
| <b>Bibliography</b> .....                                              | 157 |

## Crystal structure of CP1\_100K

### Crystal Data and Experimental

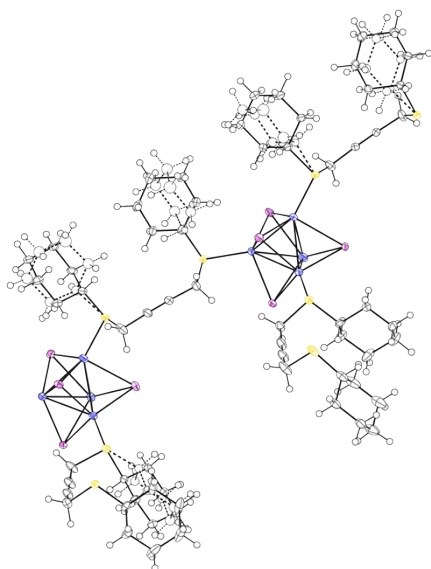

**Experimental:** The data for CP1\_100K were collected from a shock-cooled single crystal at 100.0(1) K on a Bruker D8 Venture four-circle diffractometer with a X-ray tube using a graphite as monochromator and a CPAD PHOTON II area detector detector. The diffractometer was equipped with an Oxford Cryostream 800 low temperature device and used Mo  $K_{\alpha}$  radiation ( $\lambda = 0.71073 \text{ \AA}$ ). All data were integrated with SAINT V8.38A and a multi-scan absorption correction using SADABS 2016/2 was applied.<sup>[1,2]</sup> The structure was solved by direct methods with SHELXT and refined by full-matrix least-squares methods against  $F^2$  using SHELXL.<sup>[3,4]</sup> All non-hydrogen atoms were refined with anisotropic displacement parameters, excepted minor disordered parts. For each compound, some disorders were found in the crystal structure and some geometric parameters of disordered components in each group were restrained by using RIGU or DFIX restraints. For more detail see the .res file included in the cif files. The hydrogen atoms were refined isotropically on calculated positions using a riding model with their  $U_{\text{iso}}$  values constrained to 1.5 times the  $U_{\text{eq}}$  of their pivot atoms for terminal  $sp^3$  carbon atoms and 1.2 times for all other carbon atoms. Crystallographic data for the structures reported in this paper have been deposited with the Cambridge Crystallographic Data Centre.<sup>[5]</sup> CCDC 2326781 contain the supplementary crystallographic data for this paper. These data can be obtained free of charge from The Cambridge Crystallographic Data Centre via [www.ccdc.cam.ac.uk/structures](http://www.ccdc.cam.ac.uk/structures). This report and the CIF file were generated using FinalCif.<sup>[6]</sup>

**Table S7. Crystal data and structure refinement for CP1\_100K**

|                                                 |                                                                      |
|-------------------------------------------------|----------------------------------------------------------------------|
| Internal Reference                              | CP1_100K                                                             |
| CCDC number                                     | 2326781                                                              |
| Empirical formula                               | $\text{C}_{64}\text{H}_{104}\text{Cu}_8\text{I}_8\text{S}_8$         |
| Formula weight                                  | 2653.47                                                              |
| Temperature [K]                                 | 100.0(1)                                                             |
| Crystal system                                  | triclinic                                                            |
| Space group (number)                            | $P\bar{1}$ (2)                                                       |
| $a$ [ $\text{\AA}$ ]                            | 11.7692(4)                                                           |
| $b$ [ $\text{\AA}$ ]                            | 18.6908(5)                                                           |
| $c$ [ $\text{\AA}$ ]                            | 20.6753(6)                                                           |
| $\alpha$ [ $^\circ$ ]                           | 97.2090(10)                                                          |
| $\beta$ [ $^\circ$ ]                            | 104.8990(10)                                                         |
| $\gamma$ [ $^\circ$ ]                           | 103.0370(10)                                                         |
| Volume [ $\text{\AA}^3$ ]                       | 4199.8(2)                                                            |
| $Z$                                             | 2                                                                    |
| $\rho_{\text{calc}}$ [ $\text{gcm}^{-3}$ ]      | 2.098                                                                |
| $\mu$ [ $\text{mm}^{-1}$ ]                      | 5.159                                                                |
| $F(000)$                                        | 2544                                                                 |
| Crystal size [ $\text{mm}^3$ ]                  | 0.084×0.133×0.172                                                    |
| Crystal colour                                  | clear light colourless                                               |
| Crystal shape                                   | block                                                                |
| Radiation                                       | Mo $K_{\alpha}$ ( $\lambda=0.71073 \text{ \AA}$ )                    |
| $2\theta$ range [ $^\circ$ ]                    | 4.33 to 55.00 (0.77 $\text{\AA}$ )                                   |
| Index ranges                                    | $-15 \leq h \leq 15$<br>$-24 \leq k \leq 24$<br>$-26 \leq l \leq 26$ |
| Reflections collected                           | 240995                                                               |
| Independent reflections                         | 19283<br>$R_{\text{int}} = 0.0305$<br>$R_{\text{sigma}} = 0.0131$    |
| Completeness to $\theta = 25.242^\circ$         | 99.9 %                                                               |
| Data / Restraints / Parameters                  | 19283 / 736 / 914                                                    |
| Goodness-of-fit on $F^2$                        | 1.025                                                                |
| Final $R$ indexes [ $I \geq 2\sigma(I)$ ]       | $R_1 = 0.0288$<br>$wR_2 = 0.0571$                                    |
| Final $R$ indexes [all data]                    | $R_1 = 0.0335$<br>$wR_2 = 0.0601$                                    |
| Largest peak/hole [ $\text{e}\text{\AA}^{-3}$ ] | 2.51/−2.88                                                           |

**Table S8 Bond lengths and angles for CP1\_100K**

| <b>Atom–Atom</b>     | <b>Length [Å]</b> |          |           |
|----------------------|-------------------|----------|-----------|
| I1–Cu1               | 2.7249(5)         | S5–C33   | 1.824(4)  |
| I1–Cu2               | 2.6864(5)         | S5–C39   | 1.819(4)  |
| I1–Cu3               | 2.6583(5)         | S6–C42   | 1.835(5)  |
| I2–Cu1               | 2.7218(5)         | S6–C43   | 1.813(6)  |
| I2–Cu2               | 2.6543(5)         | S7–C49A  | 1.856(5)  |
| I2–Cu4               | 2.6807(5)         | S7–C49B  | 1.811(19) |
| I3–Cu1               | 2.6003(5)         | S7–C55   | 1.809(5)  |
| I3–Cu3               | 2.6228(5)         | S8–C58   | 1.807(5)  |
| I3–Cu4               | 2.7961(6)         | S8–C59A  | 1.880(6)  |
| I4–Cu2               | 2.6703(5)         | S8–C59B  | 1.787(10) |
| I4–Cu3               | 2.7608(5)         | C1A–H1A  | 1.0000    |
| I4–Cu4               | 2.6238(6)         | C1A–C2A  | 1.533(7)  |
| I5–Cu5               | 2.6768(5)         | C1A–C6A  | 1.523(8)  |
| I5–Cu6               | 2.6762(6)         | C1B–H1B  | 1.0000    |
| I5–Cu7               | 2.6879(5)         | C1B–C2B  | 1.518(17) |
| I6–Cu5               | 2.7541(5)         | C1B–C6B  | 1.497(17) |
| I6–Cu6               | 2.6879(7)         | C2A–H2AA | 0.9900    |
| I6–Cu8               | 2.6133(6)         | C2A–H2AB | 0.9900    |
| I7–Cu5               | 2.6260(5)         | C2A–C3A  | 1.534(9)  |
| I7–Cu7               | 2.6105(6)         | C2B–H2BA | 0.9900    |
| I7–Cu8               | 2.8096(5)         | C2B–H2BB | 0.9900    |
| I8–Cu6               | 2.6331(6)         | C2B–C3B  | 1.538(18) |
| I8–Cu7               | 2.6755(6)         | C3A–H3AA | 0.9900    |
| I8–Cu8               | 2.7031(7)         | C3A–H3AB | 0.9900    |
| Cu1–Cu2              | 2.6885(7)         | C3A–C4A  | 1.526(10) |
| Cu1–Cu3              | 2.5991(6)         | C3B–H3BA | 0.9900    |
| Cu1–Cu4              | 2.7611(7)         | C3B–H3BB | 0.9900    |
| Cu1–S1               | 2.2868(10)        | C3B–C4B  | 1.48(2)   |
| Cu2–Cu3              | 2.7860(6)         | C4A–H4AA | 0.9900    |
| Cu2–Cu4              | 2.6632(6)         | C4A–H4AB | 0.9900    |
| Cu2–S8 <sup>#1</sup> | 2.2998(10)        | C4A–C5A  | 1.540(13) |
| Cu3–Cu4              | 2.7027(7)         | C4B–H4BA | 0.9900    |
| Cu3–S2 <sup>#2</sup> | 2.2781(10)        | C4B–H4BB | 0.9900    |
| Cu4–S3               | 2.3002(11)        | C4B–C5B  | 1.48(3)   |
| Cu5–Cu6              | 2.8001(7)         | C5A–H5AA | 0.9900    |
| Cu5–Cu7              | 2.6388(7)         | C5A–H5AB | 0.9900    |
| Cu5–Cu8              | 2.6772(6)         | C5A–C6A  | 1.526(11) |
| Cu5–S5               | 2.2868(11)        | C5B–H5BA | 0.9900    |
| Cu6–Cu7              | 2.7077(8)         | C5B–H5BB | 0.9900    |
| Cu6–Cu8              | 2.6595(7)         | C5B–C6B  | 1.56(3)   |
| Cu6–S4               | 2.3051(11)        | C6A–H6AA | 0.9900    |
| Cu7–Cu8              | 2.7371(8)         | C6A–H6AB | 0.9900    |
| Cu7–S6 <sup>#2</sup> | 2.2873(13)        | C6B–H6BA | 0.9900    |
| Cu8–S7               | 2.2962(11)        | C6B–H6BB | 0.9900    |
| S1–C1A               | 1.853(5)          | C7–H7A   | 0.9900    |
| S1–C1B               | 1.852(12)         | C7–H7B   | 0.9900    |
| S1–C7                | 1.824(4)          | C7–C8    | 1.460(6)  |
| S2–C10               | 1.820(4)          | C8–C9    | 1.179(6)  |
| S2–C11               | 1.825(4)          | C9–C10   | 1.459(5)  |
| S3–C17A              | 1.864(6)          | C10–H10A | 0.9900    |
| S3–C17B              | 1.877(13)         | C10–H10B | 0.9900    |
| S3–C23               | 1.822(5)          | C11–H11  | 1.0000    |
| S4–C26               | 1.822(5)          | C11–C12  | 1.528(6)  |
| S4–C27               | 1.811(5)          | C11–C16  | 1.520(6)  |
|                      |                   | C12–H12A | 0.9900    |

|           |           |           |           |
|-----------|-----------|-----------|-----------|
| C12-H12B  | 0.9900    | C27-C28B  | 1.537(15) |
| C12-C13   | 1.533(7)  | C27-C32A  | 1.519(9)  |
| C13-H13A  | 0.9900    | C27-C32B  | 1.467(14) |
| C13-H13B  | 0.9900    | C28A-H28A | 0.9900    |
| C13-C14   | 1.494(11) | C28A-H28B | 0.9900    |
| C14-H14A  | 0.9900    | C28A-C29A | 1.500(10) |
| C14-H14B  | 0.9900    | C28B-H28C | 0.9900    |
| C14-C15   | 1.528(8)  | C28B-H28D | 0.9900    |
| C15-H15A  | 0.9900    | C28B-C29B | 1.52(2)   |
| C15-H15B  | 0.9900    | C29A-H29A | 0.9900    |
| C15-C16   | 1.534(7)  | C29A-H29B | 0.9900    |
| C16-H16A  | 0.9900    | C29A-C30A | 1.470(10) |
| C16-H16B  | 0.9900    | C29B-H29C | 0.9900    |
| C17A-H17A | 1.0000    | C29B-H29D | 0.9900    |
| C17A-C18A | 1.523(8)  | C29B-C30B | 1.52(2)   |
| C17A-C22A | 1.527(8)  | C30A-H30A | 0.9900    |
| C17B-H17B | 1.0000    | C30A-H30B | 0.9900    |
| C17B-C18B | 1.502(16) | C30A-C31A | 1.548(10) |
| C17B-C22B | 1.532(17) | C30B-H30C | 0.9900    |
| C18A-H18A | 0.9900    | C30B-H30D | 0.9900    |
| C18A-H18B | 0.9900    | C30B-C31B | 1.49(2)   |
| C18A-C19A | 1.531(8)  | C31A-H31A | 0.9900    |
| C18B-H18C | 0.9900    | C31A-H31B | 0.9900    |
| C18B-H18D | 0.9900    | C31A-C32A | 1.529(11) |
| C18B-C19B | 1.534(18) | C31B-H31C | 0.9900    |
| C19A-H19A | 0.9900    | C31B-H31D | 0.9900    |
| C19A-H19B | 0.9900    | C31B-C32B | 1.55(2)   |
| C19A-C20A | 1.505(9)  | C32A-H32A | 0.9900    |
| C19B-H19C | 0.9900    | C32A-H32B | 0.9900    |
| C19B-H19D | 0.9900    | C32B-H32C | 0.9900    |
| C19B-C20B | 1.53(2)   | C32B-H32D | 0.9900    |
| C20A-H20A | 0.9900    | C33-H33   | 1.0000    |
| C20A-H20B | 0.9900    | C33-C34   | 1.519(6)  |
| C20A-C21A | 1.526(11) | C33-C38   | 1.510(6)  |
| C20B-H20C | 0.9900    | C34-H34A  | 0.9900    |
| C20B-H20D | 0.9900    | C34-H34B  | 0.9900    |
| C20B-C21B | 1.48(2)   | C34-C35   | 1.530(6)  |
| C21A-H21A | 0.9900    | C35-H35A  | 0.9900    |
| C21A-H21B | 0.9900    | C35-H35B  | 0.9900    |
| C21A-C22A | 1.547(10) | C35-C36   | 1.503(7)  |
| C21B-H21C | 0.9900    | C36-H36A  | 0.9900    |
| C21B-H21D | 0.9900    | C36-H36B  | 0.9900    |
| C21B-C22B | 1.51(2)   | C36-C37   | 1.506(8)  |
| C22A-H22A | 0.9900    | C37-H37A  | 0.9900    |
| C22A-H22B | 0.9900    | C37-H37B  | 0.9900    |
| C22B-H22C | 0.9900    | C37-C38   | 1.544(6)  |
| C22B-H22D | 0.9900    | C38-H38A  | 0.9900    |
| C23-H23A  | 0.9900    | C38-H38B  | 0.9900    |
| C23-H23B  | 0.9900    | C39-H39A  | 0.9900    |
| C23-C24   | 1.453(6)  | C39-H39B  | 0.9900    |
| C24-C25   | 1.174(6)  | C39-C40   | 1.459(6)  |
| C25-C26   | 1.452(6)  | C40-C41   | 1.184(6)  |
| C26-H26A  | 0.9900    | C41-C42   | 1.460(6)  |
| C26-H26B  | 0.9900    | C42-H42A  | 0.9900    |
| C27-H27   | 1.0000    | C42-H42B  | 0.9900    |
| C27-H27A  | 1.0000    | C43-H43   | 1.0000    |
| C27-C28A  | 1.429(7)  | C43-C44   | 1.518(6)  |

|           |           |                       |                  |
|-----------|-----------|-----------------------|------------------|
| C43–C48   | 1.527(6)  | C59A–C60A             | 1.521(8)         |
| C44–H44A  | 0.9900    | C59A–C64A             | 1.525(8)         |
| C44–H44B  | 0.9900    | C59B–H59B             | 1.0000           |
| C44–C45   | 1.518(10) | C59B–C60B             | 1.518(15)        |
| C45–H45A  | 0.9900    | C59B–C64B             | 1.523(16)        |
| C45–H45B  | 0.9900    | C60A–H60A             | 0.9900           |
| C45–C46   | 1.533(9)  | C60A–H60B             | 0.9900           |
| C46–H46A  | 0.9900    | C60A–C61A             | 1.530(8)         |
| C46–H46B  | 0.9900    | C60B–H60C             | 0.9900           |
| C46–C47   | 1.511(8)  | C60B–H60D             | 0.9900           |
| C47–H47A  | 0.9900    | C60B–C61B             | 1.525(16)        |
| C47–H47B  | 0.9900    | C61A–H61A             | 0.9900           |
| C47–C48   | 1.523(7)  | C61A–H61B             | 0.9900           |
| C48–H48A  | 0.9900    | C61A–C62A             | 1.513(10)        |
| C48–H48B  | 0.9900    | C61B–H61C             | 0.9900           |
| C49A–H49A | 1.0000    | C61B–H61D             | 0.9900           |
| C49A–C50A | 1.484(9)  | C61B–C62B             | 1.537(16)        |
| C49A–C54A | 1.528(7)  | C62A–H62A             | 0.9900           |
| C49B–H49B | 1.0000    | C62A–H62B             | 0.9900           |
| C49B–C50B | 1.51(3)   | C62A–C63A             | 1.512(9)         |
| C49B–C54B | 1.49(3)   | C62B–H62C             | 0.9900           |
| C50A–H50A | 0.9900    | C62B–H62D             | 0.9900           |
| C50A–H50B | 0.9900    | C62B–C63B             | 1.495(16)        |
| C50A–C51A | 1.541(9)  | C63A–H63A             | 0.9900           |
| C50B–H50C | 0.9900    | C63A–H63B             | 0.9900           |
| C50B–H50D | 0.9900    | C63A–C64A             | 1.528(8)         |
| C50B–C51B | 1.54(3)   | C63B–H63C             | 0.9900           |
| C51A–H51A | 0.9900    | C63B–H63D             | 0.9900           |
| C51A–H51B | 0.9900    | C63B–C64B             | 1.548(16)        |
| C51A–C52A | 1.529(9)  | C64A–H64A             | 0.9900           |
| C51B–H51C | 0.9900    | C64A–H64B             | 0.9900           |
| C51B–H51D | 0.9900    | C64B–H64C             | 0.9900           |
| C51B–C52B | 1.54(3)   | C64B–H64D             | 0.9900           |
| C52A–H52A | 0.9900    |                       |                  |
| C52A–H52B | 0.9900    | <b>Atom–Atom–Atom</b> | <b>Angle [°]</b> |
| C52A–C53A | 1.485(9)  | Cu2–I1–Cu1            | 59.577(15)       |
| C52B–H52C | 0.9900    | Cu3–I1–Cu1            | 57.722(14)       |
| C52B–H52D | 0.9900    | Cu3–I1–Cu2            | 62.831(15)       |
| C52B–C53B | 1.45(3)   | Cu2–I2–Cu1            | 59.996(15)       |
| C53A–H53A | 0.9900    | Cu2–I2–Cu4            | 59.890(15)       |
| C53A–H53B | 0.9900    | Cu4–I2–Cu1            | 61.467(15)       |
| C53A–C54A | 1.535(7)  | Cu1–I3–Cu3            | 59.683(15)       |
| C53B–H53C | 0.9900    | Cu1–I3–Cu4            | 61.423(15)       |
| C53B–H53D | 0.9900    | Cu3–I3–Cu4            | 59.733(16)       |
| C53B–C54B | 1.61(3)   | Cu2–I4–Cu3            | 61.696(14)       |
| C54A–H54A | 0.9900    | Cu4–I4–Cu2            | 60.395(15)       |
| C54A–H54B | 0.9900    | Cu4–I4–Cu3            | 60.191(16)       |
| C54B–H54C | 0.9900    | Cu5–I5–Cu7            | 58.928(16)       |
| C54B–H54D | 0.9900    | Cu6–I5–Cu5            | 63.079(16)       |
| C55–H55A  | 0.9900    | Cu6–I5–Cu7            | 60.634(17)       |
| C55–H55B  | 0.9900    | Cu6–I6–Cu5            | 61.918(16)       |
| C55–C56   | 1.464(5)  | Cu8–I6–Cu5            | 59.772(15)       |
| C56–C57   | 1.188(6)  | Cu8–I6–Cu6            | 60.203(17)       |
| C57–C58   | 1.457(6)  | Cu5–I7–Cu8            | 58.899(15)       |
| C58–H58A  | 0.9900    | Cu7–I7–Cu5            | 60.518(16)       |
| C58–H58B  | 0.9900    | Cu7–I7–Cu8            | 60.529(17)       |
| C59A–H59A | 1.0000    | Cu6–I8–Cu7            | 61.329(17)       |

|                           |             |                           |             |
|---------------------------|-------------|---------------------------|-------------|
| Cu6-I8-Cu8                | 59.771(17)  | Cu4-Cu3-I4                | 57.391(15)  |
| Cu7-I8-Cu8                | 61.177(17)  | Cu4-Cu3-Cu2               | 58.029(16)  |
| I1-Cu1-Cu4                | 106.849(19) | S2 <sup>#2</sup> -Cu3-I1  | 111.73(3)   |
| I2-Cu1-I1                 | 112.417(18) | S2 <sup>#2</sup> -Cu3-I3  | 108.46(3)   |
| I2-Cu1-Cu4                | 58.534(15)  | S2 <sup>#2</sup> -Cu3-I4  | 96.77(3)    |
| I3-Cu1-I1                 | 114.313(18) | S2 <sup>#2</sup> -Cu3-Cu1 | 154.54(3)   |
| I3-Cu1-I2                 | 112.251(18) | S2 <sup>#2</sup> -Cu3-Cu2 | 141.28(3)   |
| I3-Cu1-Cu2                | 112.587(19) | S2 <sup>#2</sup> -Cu3-Cu4 | 135.49(3)   |
| I3-Cu1-Cu4                | 62.783(15)  | I2-Cu4-I3                 | 107.570(18) |
| Cu2-Cu1-I1                | 59.499(14)  | I2-Cu4-Cu1                | 59.999(15)  |
| Cu2-Cu1-I2                | 58.757(15)  | I2-Cu4-Cu3                | 108.907(19) |
| Cu2-Cu1-Cu4               | 58.490(17)  | I4-Cu4-I2                 | 114.190(19) |
| Cu3-Cu1-I1                | 59.854(15)  | I4-Cu4-I3                 | 114.12(2)   |
| Cu3-Cu1-I2                | 110.79(2)   | I4-Cu4-Cu1                | 107.93(2)   |
| Cu3-Cu1-I3                | 60.589(15)  | I4-Cu4-Cu2                | 60.668(16)  |
| Cu3-Cu1-Cu2               | 63.565(17)  | I4-Cu4-Cu3                | 62.419(16)  |
| Cu3-Cu1-Cu4               | 60.467(18)  | Cu1-Cu4-I3                | 55.794(15)  |
| S1-Cu1-I1                 | 105.63(3)   | Cu2-Cu4-I2                | 59.564(15)  |
| S1-Cu1-I2                 | 96.52(3)    | Cu2-Cu4-I3                | 107.38(2)   |
| S1-Cu1-I3                 | 114.24(3)   | Cu2-Cu4-Cu1               | 59.391(17)  |
| S1-Cu1-Cu2                | 132.64(3)   | Cu2-Cu4-Cu3               | 62.553(18)  |
| S1-Cu1-Cu3                | 152.21(3)   | Cu3-Cu4-I3                | 56.946(15)  |
| S1-Cu1-Cu4                | 144.84(3)   | Cu3-Cu4-Cu1               | 56.797(17)  |
| I1-Cu2-Cu1                | 60.924(15)  | S3-Cu4-I2                 | 109.04(4)   |
| I1-Cu2-Cu3                | 58.092(14)  | S3-Cu4-I3                 | 92.91(3)    |
| I2-Cu2-I1                 | 115.893(18) | S3-Cu4-I4                 | 116.83(4)   |
| I2-Cu2-I4                 | 113.526(18) | S3-Cu4-Cu1                | 133.40(4)   |
| I2-Cu2-Cu1                | 61.247(15)  | S3-Cu4-Cu2                | 158.80(4)   |
| I2-Cu2-Cu3                | 107.221(19) | S3-Cu4-Cu3                | 137.18(4)   |
| I2-Cu2-Cu4                | 60.547(16)  | I5-Cu5-I6                 | 108.086(18) |
| I4-Cu2-I1                 | 108.989(17) | I5-Cu5-Cu6                | 58.449(16)  |
| I4-Cu2-Cu1                | 108.724(19) | I5-Cu5-Cu8                | 108.90(2)   |
| I4-Cu2-Cu3                | 60.749(15)  | I6-Cu5-Cu6                | 57.880(17)  |
| Cu1-Cu2-Cu3               | 56.654(16)  | I7-Cu5-I5                 | 113.43(2)   |
| Cu4-Cu2-I1                | 110.89(2)   | I7-Cu5-I6                 | 115.947(18) |
| Cu4-Cu2-I4                | 58.936(15)  | I7-Cu5-Cu6                | 109.29(2)   |
| Cu4-Cu2-Cu1               | 62.118(18)  | I7-Cu5-Cu7                | 59.450(16)  |
| Cu4-Cu2-Cu3               | 59.417(17)  | I7-Cu5-Cu8                | 63.973(16)  |
| S8 <sup>#1</sup> -Cu2-I1  | 100.31(3)   | Cu7-Cu5-I5                | 60.746(16)  |
| S8 <sup>#1</sup> -Cu2-I2  | 102.92(3)   | Cu7-Cu5-I6                | 108.39(2)   |
| S8 <sup>#1</sup> -Cu2-I4  | 114.50(3)   | Cu7-Cu5-Cu6               | 59.628(19)  |
| S8 <sup>#1</sup> -Cu2-Cu1 | 136.62(3)   | Cu7-Cu5-Cu8               | 61.97(2)    |
| S8 <sup>#1</sup> -Cu2-Cu3 | 148.49(3)   | Cu8-Cu5-I6                | 57.501(16)  |
| S8 <sup>#1</sup> -Cu2-Cu4 | 148.60(3)   | Cu8-Cu5-Cu6               | 58.046(17)  |
| I1-Cu3-I4                 | 107.145(18) | S5-Cu5-I5                 | 109.52(3)   |
| I1-Cu3-Cu2                | 59.076(14)  | S5-Cu5-I6                 | 97.27(3)    |
| I1-Cu3-Cu4                | 110.531(19) | S5-Cu5-I7                 | 111.36(3)   |
| I3-Cu3-I1                 | 115.828(19) | S5-Cu5-Cu6                | 138.75(3)   |
| I3-Cu3-I4                 | 115.336(19) | S5-Cu5-Cu7                | 154.24(3)   |
| I3-Cu3-Cu2                | 108.840(19) | S5-Cu5-Cu8                | 139.15(3)   |
| I3-Cu3-Cu4                | 63.321(16)  | I5-Cu6-I6                 | 110.09(2)   |
| I4-Cu3-Cu2                | 57.554(14)  | I5-Cu6-Cu5                | 58.472(15)  |
| Cu1-Cu3-I1                | 62.424(15)  | I5-Cu6-Cu7                | 59.898(16)  |
| Cu1-Cu3-I3                | 59.729(15)  | I6-Cu6-Cu5                | 60.202(16)  |
| Cu1-Cu3-I4                | 108.657(19) | I6-Cu6-Cu7                | 108.33(2)   |
| Cu1-Cu3-Cu2               | 59.781(17)  | I8-Cu6-I5                 | 113.22(2)   |
| Cu1-Cu3-Cu4               | 62.736(18)  | I8-Cu6-I6                 | 114.03(2)   |



|                           |             |                           |            |
|---------------------------|-------------|---------------------------|------------|
| I8-Cu6-Cu5                | 107.266(19) | C1B-S1-Cu1                | 112.2(4)   |
| I8-Cu6-Cu7                | 60.108(17)  | C7-S1-Cu1                 | 99.01(15)  |
| I8-Cu6-Cu8                | 61.422(17)  | C7-S1-C1A                 | 94.7(3)    |
| Cu7-Cu6-Cu5               | 57.224(18)  | C7-S1-C1B                 | 121.3(4)   |
| Cu8-Cu6-I5                | 109.46(2)   | C10-S2-Cu3 <sup>#3</sup>  | 105.04(13) |
| Cu8-Cu6-I6                | 58.508(18)  | C10-S2-C11                | 100.2(2)   |
| Cu8-Cu6-Cu5               | 58.662(17)  | C11-S2-Cu3 <sup>#3</sup>  | 115.15(13) |
| Cu8-Cu6-Cu7               | 61.315(19)  | C17A-S3-Cu4               | 116.48(19) |
| S4-Cu6-I5                 | 101.02(3)   | C17B-S3-Cu4               | 102.7(4)   |
| S4-Cu6-I6                 | 107.11(4)   | C23-S3-Cu4                | 102.41(15) |
| S4-Cu6-I8                 | 110.43(4)   | C23-S3-C17A               | 92.7(3)    |
| S4-Cu6-Cu5                | 141.98(4)   | C23-S3-C17B               | 123.0(4)   |
| S4-Cu6-Cu7                | 143.87(4)   | C26-S4-Cu6                | 101.34(16) |
| S4-Cu6-Cu8                | 149.21(4)   | C27-S4-Cu6                | 110.37(16) |
| I5-Cu7-Cu6                | 59.468(16)  | C27-S4-C26                | 100.5(3)   |
| I5-Cu7-Cu8                | 106.83(2)   | C33-S5-Cu5                | 113.80(13) |
| I7-Cu7-I5                 | 113.57(2)   | C39-S5-Cu5                | 103.40(14) |
| I7-Cu7-I8                 | 114.64(2)   | C39-S5-C33                | 100.1(2)   |
| I7-Cu7-Cu5                | 60.032(16)  | C42-S6-Cu7 <sup>#3</sup>  | 104.56(18) |
| I7-Cu7-Cu6                | 112.67(2)   | C43-S6-Cu7 <sup>#3</sup>  | 110.14(15) |
| I7-Cu7-Cu8                | 63.336(17)  | C43-S6-C42                | 104.2(3)   |
| I8-Cu7-I5                 | 111.49(2)   | C49A-S7-Cu8               | 109.59(18) |
| I8-Cu7-Cu6                | 58.562(17)  | C49B-S7-Cu8               | 116.5(6)   |
| I8-Cu7-Cu8                | 59.907(18)  | C55-S7-Cu8                | 99.63(15)  |
| Cu5-Cu7-I5                | 60.326(16)  | C55-S7-C49A               | 105.8(3)   |
| Cu5-Cu7-I8                | 110.86(2)   | C55-S7-C49B               | 80.4(7)    |
| Cu5-Cu7-Cu6               | 63.149(19)  | C58-S8-Cu2 <sup>#4</sup>  | 104.70(15) |
| Cu5-Cu7-Cu8               | 59.703(19)  | C58-S8-C59A               | 109.1(3)   |
| Cu6-Cu7-Cu8               | 58.474(19)  | C59A-S8-Cu2 <sup>#4</sup> | 105.1(2)   |
| S6 <sup>#2</sup> -Cu7-I5  | 111.49(3)   | C59B-S8-C58               | 87.7(4)    |
| S6 <sup>#2</sup> -Cu7-I7  | 107.16(4)   | S1-C1A-H1A                | 109.1      |
| S6 <sup>#2</sup> -Cu7-I8  | 97.23(4)    | C2A-C1A-S1                | 109.4(4)   |
| S6 <sup>#2</sup> -Cu7-Cu5 | 151.86(4)   | C2A-C1A-H1A               | 109.1      |
| S6 <sup>#2</sup> -Cu7-Cu6 | 139.25(4)   | C6A-C1A-S1                | 108.6(4)   |
| S6 <sup>#2</sup> -Cu7-Cu8 | 140.71(4)   | C6A-C1A-H1A               | 109.1      |
| I6-Cu8-I7                 | 114.49(2)   | C6A-C1A-C2A               | 111.4(5)   |
| I6-Cu8-I8                 | 114.18(2)   | S1-C1B-H1B                | 107.5      |
| I6-Cu8-Cu5                | 62.727(16)  | C2B-C1B-S1                | 112.4(8)   |
| I6-Cu8-Cu6                | 61.289(18)  | C2B-C1B-H1B               | 107.5      |
| I6-Cu8-Cu7                | 109.66(2)   | C6B-C1B-S1                | 109.5(9)   |
| I8-Cu8-I7                 | 107.62(2)   | C6B-C1B-H1B               | 107.5      |
| I8-Cu8-Cu7                | 58.916(18)  | C6B-C1B-C2B               | 112.3(11)  |
| Cu5-Cu8-I7                | 57.128(15)  | C1A-C2A-H2AA              | 109.5      |
| Cu5-Cu8-I8                | 108.85(2)   | C1A-C2A-H2AB              | 109.5      |
| Cu5-Cu8-Cu7               | 58.323(18)  | C1A-C2A-C3A               | 110.6(5)   |
| Cu6-Cu8-I7                | 108.04(2)   | H2AA-C2A-H2AB             | 108.1      |
| Cu6-Cu8-I8                | 58.807(18)  | C3A-C2A-H2AA              | 109.5      |
| Cu6-Cu8-Cu5               | 63.292(18)  | C3A-C2A-H2AB              | 109.5      |
| Cu6-Cu8-Cu7               | 60.21(2)    | C1B-C2B-H2BA              | 109.4      |
| Cu7-Cu8-I7                | 56.134(16)  | C1B-C2B-H2BB              | 109.4      |
| S7-Cu8-I6                 | 115.09(4)   | C1B-C2B-C3B               | 111.0(11)  |
| S7-Cu8-I7                 | 93.75(3)    | H2BA-C2B-H2BB             | 108.0      |
| S7-Cu8-I8                 | 109.78(3)   | C3B-C2B-H2BA              | 109.4      |
| S7-Cu8-Cu5                | 137.21(4)   | C3B-C2B-H2BB              | 109.4      |
| S7-Cu8-Cu6                | 157.47(3)   | C2A-C3A-H3AA              | 109.3      |
| S7-Cu8-Cu7                | 133.71(4)   | C2A-C3A-H3AB              | 109.3      |
| C1A-S1-Cu1                | 109.81(17)  | H3AA-C3A-H3AB             | 108.0      |

|               |           |                |           |
|---------------|-----------|----------------|-----------|
| C4A-C3A-C2A   | 111.5(6)  | C9-C10-H10B    | 110.0     |
| C4A-C3A-H3AA  | 109.3     | H10A-C10-H10B  | 108.4     |
| C4A-C3A-H3AB  | 109.3     | S2-C11-H11     | 108.0     |
| C2B-C3B-H3BA  | 109.2     | C12-C11-S2     | 112.4(3)  |
| C2B-C3B-H3BB  | 109.2     | C12-C11-H11    | 108.0     |
| H3BA-C3B-H3BB | 107.9     | C16-C11-S2     | 108.5(3)  |
| C4B-C3B-C2B   | 112.2(14) | C16-C11-H11    | 108.0     |
| C4B-C3B-H3BA  | 109.2     | C16-C11-C12    | 111.8(4)  |
| C4B-C3B-H3BB  | 109.2     | C11-C12-H12A   | 109.7     |
| C3A-C4A-H4AA  | 109.5     | C11-C12-H12B   | 109.7     |
| C3A-C4A-H4AB  | 109.5     | C11-C12-C13    | 109.8(4)  |
| C3A-C4A-C5A   | 110.7(7)  | H12A-C12-H12B  | 108.2     |
| H4AA-C4A-H4AB | 108.1     | C13-C12-H12A   | 109.7     |
| C5A-C4A-H4AA  | 109.5     | C13-C12-H12B   | 109.7     |
| C5A-C4A-H4AB  | 109.5     | C12-C13-H13A   | 109.4     |
| C3B-C4B-H4BA  | 109.6     | C12-C13-H13B   | 109.4     |
| C3B-C4B-H4BB  | 109.6     | H13A-C13-H13B  | 108.0     |
| C3B-C4B-C5B   | 110.3(18) | C14-C13-C12    | 111.1(6)  |
| H4BA-C4B-H4BB | 108.1     | C14-C13-H13A   | 109.4     |
| C5B-C4B-H4BA  | 109.6     | C14-C13-H13B   | 109.4     |
| C5B-C4B-H4BB  | 109.6     | C13-C14-H14A   | 109.1     |
| C4A-C5A-H5AA  | 109.7     | C13-C14-H14B   | 109.1     |
| C4A-C5A-H5AB  | 109.7     | C13-C14-C15    | 112.4(5)  |
| H5AA-C5A-H5AB | 108.2     | H14A-C14-H14B  | 107.9     |
| C6A-C5A-C4A   | 110.0(8)  | C15-C14-H14A   | 109.1     |
| C6A-C5A-H5AA  | 109.7     | C15-C14-H14B   | 109.1     |
| C6A-C5A-H5AB  | 109.7     | C14-C15-H15A   | 109.5     |
| C4B-C5B-H5BA  | 108.9     | C14-C15-H15B   | 109.5     |
| C4B-C5B-H5BB  | 108.9     | C14-C15-C16    | 110.9(4)  |
| C4B-C5B-C6B   | 113.4(18) | H15A-C15-H15B  | 108.1     |
| H5BA-C5B-H5BB | 107.7     | C16-C15-H15A   | 109.5     |
| C6B-C5B-H5BA  | 108.9     | C16-C15-H15B   | 109.5     |
| C6B-C5B-H5BB  | 108.9     | C11-C16-C15    | 110.1(5)  |
| C1A-C6A-C5A   | 110.7(6)  | C11-C16-H16A   | 109.6     |
| C1A-C6A-H6AA  | 109.5     | C11-C16-H16B   | 109.6     |
| C1A-C6A-H6AB  | 109.5     | C15-C16-H16A   | 109.6     |
| C5A-C6A-H6AA  | 109.5     | C15-C16-H16B   | 109.6     |
| C5A-C6A-H6AB  | 109.5     | H16A-C16-H16B  | 108.2     |
| H6AA-C6A-H6AB | 108.1     | S3-C17A-H17A   | 108.4     |
| C1B-C6B-C5B   | 109.4(14) | C18A-C17A-S3   | 114.7(4)  |
| C1B-C6B-H6BA  | 109.8     | C18A-C17A-H17A | 108.4     |
| C1B-C6B-H6BB  | 109.8     | C18A-C17A-C22A | 110.8(5)  |
| C5B-C6B-H6BA  | 109.8     | C22A-C17A-S3   | 105.8(4)  |
| C5B-C6B-H6BB  | 109.8     | C22A-C17A-H17A | 108.4     |
| H6BA-C6B-H6BB | 108.2     | S3-C17B-H17B   | 109.0     |
| S1-C7-H7A     | 109.1     | C18B-C17B-S3   | 110.4(9)  |
| S1-C7-H7B     | 109.1     | C18B-C17B-H17B | 109.0     |
| H7A-C7-H7B    | 107.8     | C18B-C17B-C22B | 113.7(11) |
| C8-C7-S1      | 112.7(3)  | C22B-C17B-S3   | 105.6(9)  |
| C8-C7-H7A     | 109.1     | C22B-C17B-H17B | 109.0     |
| C8-C7-H7B     | 109.1     | C17A-C18A-H18A | 109.3     |
| C9-C8-C7      | 173.7(5)  | C17A-C18A-H18B | 109.3     |
| C8-C9-C10     | 172.0(5)  | C17A-C18A-C19A | 111.4(5)  |
| S2-C10-H10A   | 110.0     | H18A-C18A-H18B | 108.0     |
| S2-C10-H10B   | 110.0     | C19A-C18A-H18A | 109.3     |
| C9-C10-S2     | 108.4(3)  | C19A-C18A-H18B | 109.3     |
| C9-C10-H10A   | 110.0     | C17B-C18B-H18C | 109.7     |

|                |           |                |           |
|----------------|-----------|----------------|-----------|
| C17B-C18B-H18D | 109.7     | C24-C23-H23A   | 109.2     |
| C17B-C18B-C19B | 109.8(11) | C24-C23-H23B   | 109.2     |
| H18C-C18B-H18D | 108.2     | C25-C24-C23    | 176.4(5)  |
| C19B-C18B-H18C | 109.7     | C24-C25-C26    | 176.5(6)  |
| C19B-C18B-H18D | 109.7     | S4-C26-H26A    | 108.9     |
| C18A-C19A-H19A | 109.3     | S4-C26-H26B    | 108.9     |
| C18A-C19A-H19B | 109.3     | C25-C26-S4     | 113.5(4)  |
| H19A-C19A-H19B | 107.9     | C25-C26-H26A   | 108.9     |
| C20A-C19A-C18A | 111.7(6)  | C25-C26-H26B   | 108.9     |
| C20A-C19A-H19A | 109.3     | H26A-C26-H26B  | 107.7     |
| C20A-C19A-H19B | 109.3     | S4-C27-H27     | 106.3     |
| C18B-C19B-H19C | 109.6     | S4-C27-H27A    | 103.7     |
| C18B-C19B-H19D | 109.6     | C28A-C27-S4    | 114.9(4)  |
| H19C-C19B-H19D | 108.1     | C28A-C27-H27   | 106.3     |
| C20B-C19B-C18B | 110.5(12) | C28A-C27-C32A  | 113.9(5)  |
| C20B-C19B-H19C | 109.6     | C28B-C27-S4    | 106.9(6)  |
| C20B-C19B-H19D | 109.6     | C28B-C27-H27A  | 103.7     |
| C19A-C20A-H20A | 109.3     | C32A-C27-S4    | 108.5(4)  |
| C19A-C20A-H20B | 109.3     | C32A-C27-H27   | 106.3     |
| C19A-C20A-C21A | 111.8(6)  | C32B-C27-S4    | 125.2(6)  |
| H20A-C20A-H20B | 107.9     | C32B-C27-H27A  | 103.7     |
| C21A-C20A-H20A | 109.3     | C32B-C27-C28B  | 111.3(9)  |
| C21A-C20A-H20B | 109.3     | C27-C28A-H28A  | 109.4     |
| C19B-C20B-H20C | 108.9     | C27-C28A-H28B  | 109.4     |
| C19B-C20B-H20D | 108.9     | C27-C28A-C29A  | 111.2(6)  |
| H20C-C20B-H20D | 107.7     | H28A-C28A-H28B | 108.0     |
| C21B-C20B-C19B | 113.4(15) | C29A-C28A-H28A | 109.4     |
| C21B-C20B-H20C | 108.9     | C29A-C28A-H28B | 109.4     |
| C21B-C20B-H20D | 108.9     | C27-C28B-H28C  | 108.1     |
| C20A-C21A-H21A | 109.6     | C27-C28B-H28D  | 108.1     |
| C20A-C21A-H21B | 109.6     | H28C-C28B-H28D | 107.3     |
| C20A-C21A-C22A | 110.3(5)  | C29B-C28B-C27  | 116.7(12) |
| H21A-C21A-H21B | 108.1     | C29B-C28B-H28C | 108.1     |
| C22A-C21A-H21A | 109.6     | C29B-C28B-H28D | 108.1     |
| C22A-C21A-H21B | 109.6     | C28A-C29A-H29A | 109.0     |
| C20B-C21B-H21C | 109.1     | C28A-C29A-H29B | 109.0     |
| C20B-C21B-H21D | 109.1     | H29A-C29A-H29B | 107.8     |
| C20B-C21B-C22B | 112.6(15) | C30A-C29A-C28A | 113.0(7)  |
| H21C-C21B-H21D | 107.8     | C30A-C29A-H29A | 109.0     |
| C22B-C21B-H21C | 109.1     | C30A-C29A-H29B | 109.0     |
| C22B-C21B-H21D | 109.1     | C28B-C29B-H29C | 109.7     |
| C17A-C22A-C21A | 110.1(5)  | C28B-C29B-H29D | 109.7     |
| C17A-C22A-H22A | 109.6     | H29C-C29B-H29D | 108.2     |
| C17A-C22A-H22B | 109.6     | C30B-C29B-C28B | 109.8(14) |
| C21A-C22A-H22A | 109.6     | C30B-C29B-H29C | 109.7     |
| C21A-C22A-H22B | 109.6     | C30B-C29B-H29D | 109.7     |
| H22A-C22A-H22B | 108.2     | C29A-C30A-H30A | 109.4     |
| C17B-C22B-H22C | 109.4     | C29A-C30A-H30B | 109.4     |
| C17B-C22B-H22D | 109.4     | C29A-C30A-C31A | 111.1(7)  |
| C21B-C22B-C17B | 111.2(13) | H30A-C30A-H30B | 108.0     |
| C21B-C22B-H22C | 109.4     | C31A-C30A-H30A | 109.4     |
| C21B-C22B-H22D | 109.4     | C31A-C30A-H30B | 109.4     |
| H22C-C22B-H22D | 108.0     | C29B-C30B-H30C | 109.1     |
| S3-C23-H23A    | 109.2     | C29B-C30B-H30D | 109.1     |
| S3-C23-H23B    | 109.2     | H30C-C30B-H30D | 107.8     |
| H23A-C23-H23B  | 107.9     | C31B-C30B-C29B | 112.7(15) |
| C24-C23-S3     | 112.2(3)  | C31B-C30B-H30C | 109.1     |

|                |           |                |          |
|----------------|-----------|----------------|----------|
| C31B-C30B-H30D | 109.1     | C33-C38-H38B   | 109.6    |
| C30A-C31A-H31A | 109.9     | C37-C38-H38A   | 109.6    |
| C30A-C31A-H31B | 109.9     | C37-C38-H38B   | 109.6    |
| H31A-C31A-H31B | 108.3     | H38A-C38-H38B  | 108.2    |
| C32A-C31A-C30A | 108.9(7)  | S5-C39-H39A    | 109.6    |
| C32A-C31A-H31A | 109.9     | S5-C39-H39B    | 109.6    |
| C32A-C31A-H31B | 109.9     | H39A-C39-H39B  | 108.1    |
| C30B-C31B-H31C | 110.0     | C40-C39-S5     | 110.1(3) |
| C30B-C31B-H31D | 110.0     | C40-C39-H39A   | 109.6    |
| C30B-C31B-C32B | 108.3(15) | C40-C39-H39B   | 109.6    |
| H31C-C31B-H31D | 108.4     | C41-C40-C39    | 174.3(5) |
| C32B-C31B-H31C | 110.0     | C40-C41-C42    | 174.7(6) |
| C32B-C31B-H31D | 110.0     | S6-C42-H42A    | 109.4    |
| C27-C32A-C31A  | 108.9(7)  | S6-C42-H42B    | 109.4    |
| C27-C32A-H32A  | 109.9     | C41-C42-S6     | 111.1(3) |
| C27-C32A-H32B  | 109.9     | C41-C42-H42A   | 109.4    |
| C31A-C32A-H32A | 109.9     | C41-C42-H42B   | 109.4    |
| C31A-C32A-H32B | 109.9     | H42A-C42-H42B  | 108.0    |
| H32A-C32A-H32B | 108.3     | S6-C43-H43     | 106.3    |
| C27-C32B-C31B  | 115.6(12) | C44-C43-S6     | 111.1(4) |
| C27-C32B-H32C  | 108.4     | C44-C43-H43    | 106.3    |
| C27-C32B-H32D  | 108.4     | C44-C43-C48    | 111.9(4) |
| C31B-C32B-H32C | 108.4     | C48-C43-S6     | 114.3(3) |
| C31B-C32B-H32D | 108.4     | C48-C43-H43    | 106.3    |
| H32C-C32B-H32D | 107.5     | C43-C44-H44A   | 109.6    |
| S5-C33-H33     | 107.8     | C43-C44-H44B   | 109.6    |
| C34-C33-S5     | 108.5(3)  | H44A-C44-H44B  | 108.2    |
| C34-C33-H33    | 107.8     | C45-C44-C43    | 110.1(5) |
| C38-C33-S5     | 113.2(3)  | C45-C44-H44A   | 109.6    |
| C38-C33-H33    | 107.8     | C45-C44-H44B   | 109.6    |
| C38-C33-C34    | 111.5(4)  | C44-C45-H45A   | 109.2    |
| C33-C34-H34A   | 109.7     | C44-C45-H45B   | 109.2    |
| C33-C34-H34B   | 109.7     | C44-C45-C46    | 112.0(5) |
| C33-C34-C35    | 109.9(3)  | H45A-C45-H45B  | 107.9    |
| H34A-C34-H34B  | 108.2     | C46-C45-H45A   | 109.2    |
| C35-C34-H34A   | 109.7     | C46-C45-H45B   | 109.2    |
| C35-C34-H34B   | 109.7     | C45-C46-H46A   | 109.4    |
| C34-C35-H35A   | 109.2     | C45-C46-H46B   | 109.4    |
| C34-C35-H35B   | 109.2     | H46A-C46-H46B  | 108.0    |
| H35A-C35-H35B  | 107.9     | C47-C46-C45    | 111.2(5) |
| C36-C35-C34    | 111.8(4)  | C47-C46-H46A   | 109.4    |
| C36-C35-H35A   | 109.2     | C47-C46-H46B   | 109.4    |
| C36-C35-H35B   | 109.2     | C46-C47-H47A   | 109.3    |
| C35-C36-H36A   | 109.5     | C46-C47-H47B   | 109.3    |
| C35-C36-H36B   | 109.5     | C46-C47-C48    | 111.5(6) |
| C35-C36-C37    | 110.8(5)  | H47A-C47-H47B  | 108.0    |
| H36A-C36-H36B  | 108.1     | C48-C47-H47A   | 109.3    |
| C37-C36-H36A   | 109.5     | C48-C47-H47B   | 109.3    |
| C37-C36-H36B   | 109.5     | C43-C48-H48A   | 109.3    |
| C36-C37-H37A   | 109.4     | C43-C48-H48B   | 109.3    |
| C36-C37-H37B   | 109.4     | C47-C48-C43    | 111.5(4) |
| C36-C37-C38    | 111.2(5)  | C47-C48-H48A   | 109.3    |
| H37A-C37-H37B  | 108.0     | C47-C48-H48B   | 109.3    |
| C38-C37-H37A   | 109.4     | H48A-C48-H48B  | 108.0    |
| C38-C37-H37B   | 109.4     | S7-C49A-H49A   | 106.0    |
| C33-C38-C37    | 110.1(4)  | C50A-C49A-S7   | 115.2(5) |
| C33-C38-H38A   | 109.6     | C50A-C49A-H49A | 106.0    |

|                |           |                |           |
|----------------|-----------|----------------|-----------|
| C50A-C49A-C54A | 112.5(5)  | C49A-C54A-C53A | 110.4(5)  |
| C54A-C49A-S7   | 110.5(4)  | C49A-C54A-H54A | 109.6     |
| C54A-C49A-H49A | 106.0     | C49A-C54A-H54B | 109.6     |
| S7-C49B-H49B   | 108.0     | C53A-C54A-H54A | 109.6     |
| C50B-C49B-S7   | 120.6(14) | C53A-C54A-H54B | 109.6     |
| C50B-C49B-H49B | 108.0     | H54A-C54A-H54B | 108.1     |
| C54B-C49B-S7   | 98.8(15)  | C49B-C54B-C53B | 115(2)    |
| C54B-C49B-H49B | 108.0     | C49B-C54B-H54C | 108.4     |
| C54B-C49B-C50B | 112.5(19) | C49B-C54B-H54D | 108.4     |
| C49A-C50A-H50A | 109.4     | C53B-C54B-H54C | 108.4     |
| C49A-C50A-H50B | 109.4     | C53B-C54B-H54D | 108.4     |
| C49A-C50A-C51A | 111.0(7)  | H54C-C54B-H54D | 107.5     |
| H50A-C50A-H50B | 108.0     | S7-C55-H55A    | 108.5     |
| C51A-C50A-H50A | 109.4     | S7-C55-H55B    | 108.5     |
| C51A-C50A-H50B | 109.4     | H55A-C55-H55B  | 107.5     |
| C49B-C50B-H50C | 109.4     | C56-C55-S7     | 115.1(3)  |
| C49B-C50B-H50D | 109.4     | C56-C55-H55A   | 108.5     |
| C49B-C50B-C51B | 111.0(17) | C56-C55-H55B   | 108.5     |
| H50C-C50B-H50D | 108.0     | C57-C56-C55    | 178.0(5)  |
| C51B-C50B-H50C | 109.4     | C56-C57-C58    | 177.0(5)  |
| C51B-C50B-H50D | 109.4     | S8-C58-H58A    | 109.1     |
| C50A-C51A-H51A | 109.7     | S8-C58-H58B    | 109.1     |
| C50A-C51A-H51B | 109.7     | C57-C58-S8     | 112.6(3)  |
| H51A-C51A-H51B | 108.2     | C57-C58-H58A   | 109.1     |
| C52A-C51A-C50A | 110.0(5)  | C57-C58-H58B   | 109.1     |
| C52A-C51A-H51A | 109.7     | H58A-C58-H58B  | 107.8     |
| C52A-C51A-H51B | 109.7     | S8-C59A-H59A   | 106.9     |
| C50B-C51B-H51C | 109.2     | C60A-C59A-S8   | 110.6(4)  |
| C50B-C51B-H51D | 109.2     | C60A-C59A-H59A | 106.9     |
| H51C-C51B-H51D | 107.9     | C60A-C59A-C64A | 112.1(6)  |
| C52B-C51B-C50B | 112(2)    | C64A-C59A-S8   | 113.0(4)  |
| C52B-C51B-H51C | 109.2     | C64A-C59A-H59A | 106.9     |
| C52B-C51B-H51D | 109.2     | S8-C59B-H59B   | 109.7     |
| C51A-C52A-H52A | 109.7     | C60B-C59B-S8   | 105.3(7)  |
| C51A-C52A-H52B | 109.7     | C60B-C59B-H59B | 109.7     |
| H52A-C52A-H52B | 108.2     | C60B-C59B-C64B | 112.2(10) |
| C53A-C52A-C51A | 109.9(6)  | C64B-C59B-S8   | 110.1(8)  |
| C53A-C52A-H52A | 109.7     | C64B-C59B-H59B | 109.7     |
| C53A-C52A-H52B | 109.7     | C59A-C60A-H60A | 109.6     |
| C51B-C52B-H52C | 108.3     | C59A-C60A-H60B | 109.6     |
| C51B-C52B-H52D | 108.3     | C59A-C60A-C61A | 110.2(5)  |
| H52C-C52B-H52D | 107.4     | H60A-C60A-H60B | 108.1     |
| C53B-C52B-C51B | 116(2)    | C61A-C60A-H60A | 109.6     |
| C53B-C52B-H52C | 108.3     | C61A-C60A-H60B | 109.6     |
| C53B-C52B-H52D | 108.3     | C59B-C60B-H60C | 109.4     |
| C52A-C53A-H53A | 109.2     | C59B-C60B-H60D | 109.4     |
| C52A-C53A-H53B | 109.2     | C59B-C60B-C61B | 111.0(9)  |
| C52A-C53A-C54A | 111.9(5)  | H60C-C60B-H60D | 108.0     |
| H53A-C53A-H53B | 107.9     | C61B-C60B-H60C | 109.4     |
| C54A-C53A-H53A | 109.2     | C61B-C60B-H60D | 109.4     |
| C54A-C53A-H53B | 109.2     | C60A-C61A-H61A | 109.3     |
| C52B-C53B-H53C | 109.8     | C60A-C61A-H61B | 109.3     |
| C52B-C53B-H53D | 109.8     | H61A-C61A-H61B | 107.9     |
| C52B-C53B-C54B | 109(2)    | C62A-C61A-C60A | 111.8(5)  |
| H53C-C53B-H53D | 108.3     | C62A-C61A-H61A | 109.3     |
| C54B-C53B-H53C | 109.8     | C62A-C61A-H61B | 109.3     |
| C54B-C53B-H53D | 109.8     | C60B-C61B-H61C | 109.5     |

|                |           |                |           |
|----------------|-----------|----------------|-----------|
| C60B–C61B–H61D | 109.5     | C64A–C63A–H63B | 109.4     |
| C60B–C61B–C62B | 110.7(10) | C62B–C63B–H63C | 109.2     |
| H61C–C61B–H61D | 108.1     | C62B–C63B–H63D | 109.2     |
| C62B–C61B–H61C | 109.5     | C62B–C63B–C64B | 112.0(10) |
| C62B–C61B–H61D | 109.5     | H63C–C63B–H63D | 107.9     |
| C61A–C62A–H62A | 109.4     | C64B–C63B–H63C | 109.2     |
| C61A–C62A–H62B | 109.4     | C64B–C63B–H63D | 109.2     |
| H62A–C62A–H62B | 108.0     | C59A–C64A–C63A | 110.7(5)  |
| C63A–C62A–C61A | 111.0(6)  | C59A–C64A–H64A | 109.5     |
| C63A–C62A–H62A | 109.4     | C59A–C64A–H64B | 109.5     |
| C63A–C62A–H62B | 109.4     | C63A–C64A–H64A | 109.5     |
| C61B–C62B–H62C | 109.4     | C63A–C64A–H64B | 109.5     |
| C61B–C62B–H62D | 109.4     | H64A–C64A–H64B | 108.1     |
| H62C–C62B–H62D | 108.0     | C59B–C64B–C63B | 109.8(10) |
| C63B–C62B–C61B | 111.1(10) | C59B–C64B–H64C | 109.7     |
| C63B–C62B–H62C | 109.4     | C59B–C64B–H64D | 109.7     |
| C63B–C62B–H62D | 109.4     | C63B–C64B–H64C | 109.7     |
| C62A–C63A–H63A | 109.4     | C63B–C64B–H64D | 109.7     |
| C62A–C63A–H63B | 109.4     | H64C–C64B–H64D | 108.2     |
| C62A–C63A–C64A | 111.0(6)  |                |           |
| H63A–C63A–H63B | 108.0     |                |           |
| C64A–C63A–H63A | 109.4     |                |           |

Symmetry transformations used to generate equivalent atoms:  
 #1: -1+X, -1+Y, -1+Z; #2: 1+X, +Y, +Z; #3: -1+X, +Y, +Z; #4:  
 1+X, 1+Y, 1+Z;

**Table S9 Torsion angles for CP1\_100K**

| <b>Atom–Atom–Atom–Atom</b>      | <b>Torsion Angle<br/>[°]</b> |                   |            |
|---------------------------------|------------------------------|-------------------|------------|
| Cu1–S1–C1A–C2A                  | 174.3(4)                     | Cu8–S7–C49A–C54A  | -169.6(4)  |
| Cu1–S1–C1A–C6A                  | 52.5(4)                      | Cu8–S7–C49B–C50B  | -25(2)     |
| Cu1–S1–C1B–C2B                  | -179.8(8)                    | Cu8–S7–C49B–C54B  | 98.3(15)   |
| Cu1–S1–C1B–C6B                  | -54.3(10)                    | Cu8–S7–C55–C56    | -155.4(3)  |
| Cu1–S1–C7–C8                    | -160.4(4)                    | S1–C1A–C2A–C3A    | -175.3(5)  |
| Cu2 <sup>#1</sup> –S8–C58–C57   | 159.4(3)                     | S1–C1A–C6A–C5A    | 178.0(5)   |
| Cu2 <sup>#1</sup> –S8–C59A–C60A | 174.4(4)                     | S1–C1B–C2B–C3B    | 178.1(10)  |
| Cu2 <sup>#1</sup> –S8–C59A–C64A | 47.8(6)                      | S1–C1B–C6B–C5B    | -178.4(11) |
| Cu2 <sup>#1</sup> –S8–C59B–C60B | -97.8(7)                     | S2–C11–C12–C13    | -179.6(4)  |
| Cu2 <sup>#1</sup> –S8–C59B–C64B | 23.3(10)                     | S2–C11–C16–C15    | -178.7(3)  |
| Cu3 <sup>#2</sup> –S2–C10–C9    | 157.7(3)                     | S3–C17A–C18A–C19A | -175.7(4)  |
| Cu3 <sup>#2</sup> –S2–C11–C12   | 33.7(4)                      | S3–C17A–C22A–C21A | -177.8(5)  |
| Cu3 <sup>#2</sup> –S2–C11–C16   | -90.4(3)                     | S3–C17B–C18B–C19B | 173.2(9)   |
| Cu4–S3–C17A–C18A                | 30.8(5)                      | S3–C17B–C22B–C21B | -173.6(11) |
| Cu4–S3–C17A–C22A                | -91.7(4)                     | S4–C27–C28A–C29A  | 178.6(5)   |
| Cu4–S3–C17B–C18B                | 49.1(9)                      | S4–C27–C28B–C29B  | 176.5(10)  |
| Cu4–S3–C17B–C22B                | 172.4(8)                     | S4–C27–C32A–C31A  | -172.8(6)  |
| Cu4–S3–C23–C24                  | 150.9(3)                     | S4–C27–C32B–C31B  | 178.6(10)  |
| Cu5–S5–C33–C34                  | 85.4(3)                      | S5–C33–C34–C35    | 178.0(3)   |
| Cu5–S5–C33–C38                  | -39.0(4)                     | S5–C33–C38–C37    | 179.3(4)   |
| Cu5–S5–C39–C40                  | -172.9(3)                    | S6–C43–C44–C45    | 175.4(3)   |
| Cu6–S4–C26–C25                  | -165.3(4)                    | S6–C43–C48–C47    | -177.5(3)  |
| Cu6–S4–C27–C28A                 | 173.2(4)                     | S7–C49A–C50A–C51A | 177.2(5)   |
| Cu6–S4–C27–C28B                 | 99.7(7)                      | S7–C49A–C54A–C53A | -176.6(4)  |
| Cu6–S4–C27–C32A                 | 44.6(5)                      | S7–C49B–C50B–C51B | 168.6(16)  |
| Cu6–S4–C27–C32B                 | -33.1(9)                     | S7–C49B–C54B–C53B | -179(2)    |
| Cu7 <sup>#2</sup> –S6–C42–C41   | 139.1(4)                     | S8–C59A–C60A–C61A | 178.4(5)   |
| Cu7 <sup>#2</sup> –S6–C43–C44   | 173.1(3)                     | S8–C59A–C64A–C63A | -179.0(5)  |
| Cu7 <sup>#2</sup> –S6–C43–C48   | 45.2(4)                      | S8–C59B–C60B–C61B | 175.7(8)   |
| Cu8–S7–C49A–C50A                | -40.8(5)                     | S8–C59B–C64B–C63B | -171.6(8)  |
|                                 |                              | C1A–S1–C7–C8      | 88.7(4)    |
|                                 |                              | C1A–C2A–C3A–C4A   | 54.7(8)    |

|                     |           |                     |            |
|---------------------|-----------|---------------------|------------|
| C1B-S1-C7-C8        | 76.7(6)   | C30B-C31B-C32B-C27  | -56.2(19)  |
| C1B-C2B-C3B-C4B     | -55.2(17) | C32A-C27-C28A-C29A  | -55.5(8)   |
| C2A-C1A-C6A-C5A     | 57.4(7)   | C32B-C27-C28B-C29B  | -43.5(15)  |
| C2A-C3A-C4A-C5A     | -56.2(10) | C33-S5-C39-C40      | 69.5(4)    |
| C2B-C1B-C6B-C5B     | -52.8(16) | C33-C34-C35-C36     | 56.3(5)    |
| C2B-C3B-C4B-C5B     | 56(2)     | C34-C33-C38-C37     | 56.6(6)    |
| C3A-C4A-C5A-C6A     | 57.5(10)  | C34-C35-C36-C37     | -56.4(6)   |
| C3B-C4B-C5B-C6B     | -56(2)    | C35-C36-C37-C38     | 55.9(6)    |
| C4A-C5A-C6A-C1A     | -58.1(9)  | C36-C37-C38-C33     | -56.0(7)   |
| C4B-C5B-C6B-C1B     | 55(2)     | C38-C33-C34-C35     | -56.6(5)   |
| C6A-C1A-C2A-C3A     | -55.2(7)  | C39-S5-C33-C34      | -165.0(3)  |
| C6B-C1B-C2B-C3B     | 54.1(15)  | C39-S5-C33-C38      | 70.6(4)    |
| C7-S1-C1A-C2A       | -84.3(4)  | C42-S6-C43-C44      | 61.4(4)    |
| C7-S1-C1A-C6A       | 153.9(4)  | C42-S6-C43-C48      | -66.4(4)   |
| C7-S1-C1B-C2B       | -63.4(10) | C43-S6-C42-C41      | -105.3(5)  |
| C7-S1-C1B-C6B       | 62.1(10)  | C43-C44-C45-C46     | 55.7(6)    |
| C10-S2-C11-C12      | -78.3(4)  | C44-C43-C48-C47     | 55.0(6)    |
| C10-S2-C11-C16      | 157.5(3)  | C44-C45-C46-C47     | -55.7(8)   |
| C11-S2-C10-C9       | -82.6(3)  | C45-C46-C47-C48     | 54.2(7)    |
| C11-C12-C13-C14     | 56.2(7)   | C46-C47-C48-C43     | -54.1(5)   |
| C12-C11-C16-C15     | 56.8(5)   | C48-C43-C44-C45     | -55.5(6)   |
| C12-C13-C14-C15     | -56.0(8)  | C49A-S7-C55-C56     | 91.0(4)    |
| C13-C14-C15-C16     | 55.3(8)   | C49A-C50A-C51A-C52A | 57.2(11)   |
| C14-C15-C16-C11     | -54.6(7)  | C49B-S7-C55-C56     | 89.2(7)    |
| C16-C11-C12-C13     | -57.3(6)  | C49B-C50B-C51B-C52B | -53(3)     |
| C17A-S3-C23-C24     | -91.2(4)  | C50A-C49A-C54A-C53A | 53.1(7)    |
| C17A-C18A-C19A-C20A | 54.5(8)   | C50A-C51A-C52A-C53A | -58.6(10)  |
| C17B-S3-C23-C24     | -94.8(6)  | C50B-C49B-C54B-C53B | -51(3)     |
| C17B-C18B-C19B-C20B | -54.7(16) | C50B-C51B-C52B-C53B | 54(3)      |
| C18A-C17A-C22A-C21A | 57.3(7)   | C51A-C52A-C53A-C54A | 58.2(8)    |
| C18A-C19A-C20A-C21A | -54.8(8)  | C51B-C52B-C53B-C54B | -49(4)     |
| C18B-C17B-C22B-C21B | -52.5(17) | C52A-C53A-C54A-C49A | -54.9(7)   |
| C18B-C19B-C20B-C21B | 55.4(19)  | C52B-C53B-C54B-C49B | 48(3)      |
| C19A-C20A-C21A-C22A | 56.1(8)   | C54A-C49A-C50A-C51A | -54.9(8)   |
| C19B-C20B-C21B-C22B | -54(2)    | C54B-C49B-C50B-C51B | 53(3)      |
| C20A-C21A-C22A-C17A | -57.1(8)  | C55-S7-C49A-C50A    | 65.8(5)    |
| C20B-C21B-C22B-C17B | 51(2)     | C55-S7-C49A-C54A    | -63.0(5)   |
| C22A-C17A-C18A-C19A | -55.9(7)  | C55-S7-C49B-C50B    | 71.4(17)   |
| C22B-C17B-C18B-C19B | 54.7(15)  | C55-S7-C49B-C54B    | -165.7(15) |
| C23-S3-C17A-C18A    | -74.5(5)  | C58-S8-C59A-C60A    | 62.6(5)    |
| C23-S3-C17A-C22A    | 163.0(4)  | C58-S8-C59A-C64A    | -64.0(6)   |
| C23-S3-C17B-C18B    | -65.1(10) | C58-S8-C59B-C60B    | 156.4(8)   |
| C23-S3-C17B-C22B    | 58.3(10)  | C58-S8-C59B-C64B    | -82.5(8)   |
| C26-S4-C27-C28A     | -80.4(5)  | C59A-S8-C58-C57     | -88.6(4)   |
| C26-S4-C27-C28B     | -153.9(7) | C59A-C60A-C61A-C62A | 55.1(8)    |
| C26-S4-C27-C32A     | 151.0(5)  | C59B-S8-C58-C57     | -79.2(5)   |
| C26-S4-C27-C32B     | 73.3(8)   | C59B-C60B-C61B-C62B | -55.6(13)  |
| C27-S4-C26-C25      | 81.3(5)   | C60A-C59A-C64A-C63A | 55.3(8)    |
| C27-C28A-C29A-C30A  | 53.8(9)   | C60A-C61A-C62A-C63A | -56.7(8)   |
| C27-C28B-C29B-C30B  | 46.9(18)  | C60B-C59B-C64B-C63B | -54.7(13)  |
| C28A-C27-C32A-C31A  | 57.9(9)   | C60B-C61B-C62B-C63B | 56.3(14)   |
| C28A-C29A-C30A-C31A | -54.4(11) | C61A-C62A-C63A-C64A | 56.7(8)    |
| C28B-C27-C32B-C31B  | 47.5(15)  | C61B-C62B-C63B-C64B | -56.4(14)  |
| C28B-C29B-C30B-C31B | -56(2)    | C62A-C63A-C64A-C59A | -55.8(9)   |
| C29A-C30A-C31A-C32A | 55.9(12)  | C62B-C63B-C64B-C59B | 55.2(13)   |
| C29B-C30B-C31B-C32B | 59(2)     | C64A-C59A-C60A-C61A | -54.5(8)   |
| C30A-C31A-C32A-C27  | -55.7(11) | C64B-C59B-C60B-C61B | 56.0(13)   |

Symmetry transformations used to generate equivalent atoms:  
#1:  $1+X, 1+Y, 1+Z$ ; #2:  $-1+X, +Y, +Z$ ;



## Crystal structure of CP1\_150K

### Crystal Data and Experimental

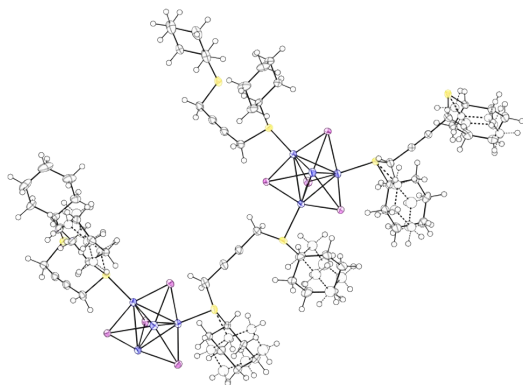

**Experimental:** The data for CP1\_150K were collected from a shock-cooled single crystal at 150.0(1) K on a Bruker D8 Venture four-circle diffractometer with a X-ray tube using a graphite as monochromator and a CPAD PHOTON II area detector detector. The diffractometer was equipped with an Oxford Cryostream 800 low temperature device and used Mo  $K_{\alpha}$  radiation ( $\lambda = 0.71073$  Å). All data were integrated with SAINT V8.38A and a multi-scan absorption correction using SADABS 2016/2 was applied. [1,2] The structure was solved by direct methods with SHELXT and refined by full-matrix least-squares methods against  $F^2$  using SHELXL.[3,4] All non-hydrogen atoms were refined with anisotropic displacement parameters, excepted minor disordered parts. For each compound, some disorders were found in the crystal structure and some geometric parameters of disordered components in each group were restrained by using RIGU or DFIX restraints. For more detail see the .res file included in the cif files. The hydrogen atoms were refined isotropically on calculated positions using a riding model with their  $U_{iso}$  values constrained to 1.5 times the  $U_{eq}$  of their pivot atoms for terminal  $sp^3$  carbon atoms and 1.2 times for all other carbon atoms. Crystallographic data for the structures reported in this paper have been deposited with the Cambridge Crystallographic Data Centre.[5] CCDC 2326782 contain the supplementary crystallographic data for this paper. These data can be obtained free of charge from The Cambridge Crystallographic Data Centre via [www.ccdc.cam.ac.uk/structures](http://www.ccdc.cam.ac.uk/structures). This report and the CIF file were generated using FinalCif.[6]

**Table S10** Crystal data and structure refinement for CP1\_150K

|                                           |                                                                      |
|-------------------------------------------|----------------------------------------------------------------------|
| Internal Reference                        | CP1_150K                                                             |
| CCDC number                               | 2326782                                                              |
| Empirical formula                         | $C_{64}H_{104}Cu_8I_8S_8$                                            |
| Formula weight                            | 2653.47                                                              |
| Temperature [K]                           | 150.0(1)                                                             |
| Crystal system                            | triclinic                                                            |
| Space group (number)                      | $P\bar{1}$ (2)                                                       |
| $a$ [Å]                                   | 11.7999(4)                                                           |
| $b$ [Å]                                   | 18.7275(5)                                                           |
| $c$ [Å]                                   | 20.7647(6)                                                           |
| $\alpha$ [°]                              | 97.4108(10)                                                          |
| $\beta$ [°]                               | 104.6354(10)                                                         |
| $\gamma$ [°]                              | 103.1049(10)                                                         |
| Volume [Å <sup>3</sup> ]                  | 4238.8(2)                                                            |
| $Z$                                       | 2                                                                    |
| $\rho_{calc}$ [gcm <sup>-3</sup> ]        | 2.079                                                                |
| $\mu$ [mm <sup>-1</sup> ]                 | 5.112                                                                |
| $F(000)$                                  | 2544                                                                 |
| Crystal size [mm <sup>3</sup> ]           | 0.084×0.133×0.172                                                    |
| Crystal colour                            | clear light colourless                                               |
| Crystal shape                             | block                                                                |
| Radiation                                 | Mo $K_{\alpha}$ ( $\lambda=0.71073$ Å)                               |
| $2\theta$ range [°]                       | 4.31 to 55.00 (0.77 Å)                                               |
| Index ranges                              | $-15 \leq h \leq 15$<br>$-24 \leq k \leq 24$<br>$-26 \leq l \leq 26$ |
| Reflections collected                     | 509188                                                               |
| Independent reflections                   | 19468<br>$R_{int} = 0.0282$<br>$R_{sigma} = 0.0090$                  |
| Completeness to $\theta = 25.242^\circ$   | 99.9 %                                                               |
| Data / Restraints / Parameters            | 19468 / 736 / 914                                                    |
| Goodness-of-fit on $F^2$                  | 1.086                                                                |
| Final $R$ indexes [ $I \geq 2\sigma(I)$ ] | $R_1 = 0.0289$<br>$wR_2 = 0.0568$                                    |
| Final $R$ indexes [all data]              | $R_1 = 0.0334$<br>$wR_2 = 0.0604$                                    |
| Largest peak/hole [eÅ <sup>-3</sup> ]     | 1.80/−1.81                                                           |

**Table S11 Bond lengths and angles for CP1\_150K**

| <b>Atom–Atom</b>     | <b>Length [Å]</b> |          |           |
|----------------------|-------------------|----------|-----------|
| I1–Cu1               | 2.7276(5)         | S5–C33   | 1.825(4)  |
| I1–Cu2               | 2.6870(5)         | S5–C39   | 1.822(4)  |
| I1–Cu3               | 2.6631(5)         | S6–C42   | 1.832(4)  |
| I2–Cu1               | 2.7264(5)         | S6–C43   | 1.816(5)  |
| I2–Cu2               | 2.6572(6)         | S7–C55   | 1.805(5)  |
| I2–Cu4               | 2.6801(6)         | S7–C49A  | 1.861(6)  |
| I3–Cu1               | 2.6002(5)         | S7–C49B  | 1.848(16) |
| I3–Cu3               | 2.6244(6)         | S8–C58   | 1.811(5)  |
| I3–Cu4               | 2.8024(6)         | S8–C59A  | 1.862(5)  |
| I4–Cu2               | 2.6722(5)         | S8–C59B  | 1.823(13) |
| I4–Cu3               | 2.7659(6)         | C7–H7A   | 0.9900    |
| I4–Cu4               | 2.6250(6)         | C7–H7B   | 0.9900    |
| I5–Cu5               | 2.6810(5)         | C7–C8    | 1.455(5)  |
| I5–Cu6               | 2.6785(5)         | C8–C9    | 1.180(6)  |
| I5–Cu7               | 2.6903(5)         | C9–C10   | 1.463(5)  |
| I6–Cu5               | 2.7616(5)         | C10–H10A | 0.9900    |
| I6–Cu6               | 2.6911(6)         | C10–H10B | 0.9900    |
| I6–Cu8               | 2.6147(6)         | C11–H11  | 1.0000    |
| I7–Cu5               | 2.6272(5)         | C11–C12  | 1.515(6)  |
| I7–Cu7               | 2.6129(6)         | C11–C16  | 1.527(6)  |
| I7–Cu8               | 2.8187(6)         | C12–H12A | 0.9900    |
| I8–Cu6               | 2.6368(6)         | C12–H12B | 0.9900    |
| I8–Cu7               | 2.6789(6)         | C12–C13  | 1.529(7)  |
| I8–Cu8               | 2.7058(6)         | C13–H13A | 0.9900    |
| Cu1–Cu2              | 2.7018(7)         | C13–H13B | 0.9900    |
| Cu1–Cu3              | 2.6030(7)         | C13–C14  | 1.520(9)  |
| Cu1–Cu4              | 2.7793(7)         | C14–H14A | 0.9900    |
| Cu1–S1               | 2.2895(10)        | C14–H14B | 0.9900    |
| Cu2–Cu3              | 2.7966(7)         | C14–C15  | 1.497(10) |
| Cu2–Cu4              | 2.6763(7)         | C15–H15A | 0.9900    |
| Cu2–S8 <sup>#1</sup> | 2.3037(10)        | C15–H15B | 0.9900    |
| Cu3–Cu4              | 2.7236(7)         | C15–C16  | 1.536(7)  |
| Cu3–S2 <sup>#2</sup> | 2.2818(10)        | C16–H16A | 0.9900    |
| Cu4–S3               | 2.3047(11)        | C16–H16B | 0.9900    |
| Cu5–Cu6              | 2.8164(7)         | C23–H23A | 0.9900    |
| Cu5–Cu7              | 2.6480(7)         | C23–H23B | 0.9900    |
| Cu5–Cu8              | 2.6972(7)         | C23–C24  | 1.454(6)  |
| Cu5–S5               | 2.2906(10)        | C24–C25  | 1.170(6)  |
| Cu6–Cu7              | 2.7266(7)         | C25–C26  | 1.460(6)  |
| Cu6–Cu8              | 2.6693(7)         | C26–H26A | 0.9900    |
| Cu6–S4               | 2.3058(10)        | C26–H26B | 0.9900    |
| Cu7–Cu8              | 2.7517(7)         | C27–H27  | 1.0000    |
| Cu7–S6 <sup>#2</sup> | 2.2941(12)        | C27–H27A | 1.0000    |
| Cu8–S7               | 2.2972(10)        | C27–C28A | 1.449(7)  |
| S1–C7                | 1.821(4)          | C27–C32A | 1.514(9)  |
| S1–C1A               | 1.868(5)          | C27–C28B | 1.53(2)   |
| S1–C1B               | 1.799(13)         | C27–C32B | 1.426(19) |
| S2–C10               | 1.821(4)          | C33–H33  | 1.0000    |
| S2–C11               | 1.825(4)          | C33–C34  | 1.513(6)  |
| S3–C23               | 1.833(5)          | C33–C38  | 1.511(6)  |
| S3–C17A              | 1.852(5)          | C34–H34A | 0.9900    |
| S3–C17B              | 1.919(16)         | C34–H34B | 0.9900    |
| S4–C26               | 1.820(5)          | C34–C35  | 1.523(6)  |
| S4–C27               | 1.817(4)          | C35–H35A | 0.9900    |
|                      |                   | C35–H35B | 0.9900    |

|          |           |           |           |
|----------|-----------|-----------|-----------|
| C35-C36  | 1.499(7)  | C17A-H17A | 1.0000    |
| C36-H36A | 0.9900    | C17A-C18A | 1.520(7)  |
| C36-H36B | 0.9900    | C17A-C22A | 1.525(8)  |
| C36-C37  | 1.502(8)  | C18A-H18A | 0.9900    |
| C37-H37A | 0.9900    | C18A-H18B | 0.9900    |
| C37-H37B | 0.9900    | C18A-C19A | 1.529(8)  |
| C37-C38  | 1.540(6)  | C19A-H19A | 0.9900    |
| C38-H38A | 0.9900    | C19A-H19B | 0.9900    |
| C38-H38B | 0.9900    | C19A-C20A | 1.511(9)  |
| C39-H39A | 0.9900    | C20A-H20A | 0.9900    |
| C39-H39B | 0.9900    | C20A-H20B | 0.9900    |
| C39-C40  | 1.458(6)  | C20A-C21A | 1.514(11) |
| C40-C41  | 1.191(6)  | C21A-H21A | 0.9900    |
| C41-C42  | 1.460(6)  | C21A-H21B | 0.9900    |
| C42-H42A | 0.9900    | C21A-C22A | 1.555(9)  |
| C42-H42B | 0.9900    | C22A-H22A | 0.9900    |
| C43-H43  | 1.0000    | C22A-H22B | 0.9900    |
| C43-C44  | 1.526(6)  | C28A-H28A | 0.9900    |
| C43-C48  | 1.523(6)  | C28A-H28B | 0.9900    |
| C44-H44A | 0.9900    | C28A-C29A | 1.500(9)  |
| C44-H44B | 0.9900    | C29A-H29A | 0.9900    |
| C44-C45  | 1.518(8)  | C29A-H29B | 0.9900    |
| C45-H45A | 0.9900    | C29A-C30A | 1.459(11) |
| C45-H45B | 0.9900    | C30A-H30A | 0.9900    |
| C45-C46  | 1.528(8)  | C30A-H30B | 0.9900    |
| C46-H46A | 0.9900    | C30A-C31A | 1.545(10) |
| C46-H46B | 0.9900    | C31A-H31A | 0.9900    |
| C46-C47  | 1.514(7)  | C31A-H31B | 0.9900    |
| C47-H47A | 0.9900    | C31A-C32A | 1.522(10) |
| C47-H47B | 0.9900    | C32A-H32A | 0.9900    |
| C47-C48  | 1.531(7)  | C32A-H32B | 0.9900    |
| C48-H48A | 0.9900    | C49A-H49A | 1.0000    |
| C48-H48B | 0.9900    | C49A-C50A | 1.481(9)  |
| C55-H55A | 0.9900    | C49A-C54A | 1.521(7)  |
| C55-H55B | 0.9900    | C50A-H50A | 0.9900    |
| C55-C56  | 1.463(6)  | C50A-H50B | 0.9900    |
| C56-C57  | 1.190(6)  | C50A-C51A | 1.548(9)  |
| C57-C58  | 1.458(6)  | C51A-H51A | 0.9900    |
| C58-H58A | 0.9900    | C51A-H51B | 0.9900    |
| C58-H58B | 0.9900    | C51A-C52A | 1.518(10) |
| C1A-H1A  | 1.0000    | C52A-H52A | 0.9900    |
| C1A-C2A  | 1.517(7)  | C52A-H52B | 0.9900    |
| C1A-C6A  | 1.535(7)  | C52A-C53A | 1.483(10) |
| C2A-H2AA | 0.9900    | C53A-H53A | 0.9900    |
| C2A-H2AB | 0.9900    | C53A-H53B | 0.9900    |
| C2A-C3A  | 1.544(13) | C53A-C54A | 1.532(8)  |
| C3A-H3AA | 0.9900    | C54A-H54A | 0.9900    |
| C3A-H3AB | 0.9900    | C54A-H54B | 0.9900    |
| C3A-C4A  | 1.513(15) | C59A-H59A | 1.0000    |
| C4A-H4AA | 0.9900    | C59A-C60A | 1.516(8)  |
| C4A-H4AB | 0.9900    | C59A-C64A | 1.527(8)  |
| C4A-C5A  | 1.534(10) | C60A-H60A | 0.9900    |
| C5A-H5AA | 0.9900    | C60A-H60B | 0.9900    |
| C5A-H5AB | 0.9900    | C60A-C61A | 1.533(9)  |
| C5A-C6A  | 1.532(9)  | C61A-H61A | 0.9900    |
| C6A-H6AA | 0.9900    | C61A-H61B | 0.9900    |
| C6A-H6AB | 0.9900    | C61A-C62A | 1.494(10) |

|           |          |
|-----------|----------|
| C62A–H62A | 0.9900   |
| C62A–H62B | 0.9900   |
| C62A–C63A | 1.514(9) |
| C63A–H63A | 0.9900   |
| C63A–H63B | 0.9900   |
| C63A–C64A | 1.528(8) |
| C64A–H64A | 0.9900   |
| C64A–H64B | 0.9900   |
| C1B–H1B   | 1.0000   |
| C1B–C2B   | 1.50(2)  |
| C1B–C6B   | 1.52(2)  |
| C2B–H2BA  | 0.9900   |
| C2B–H2BB  | 0.9900   |
| C2B–C3B   | 1.53(4)  |
| C3B–H3BA  | 0.9900   |
| C3B–H3BB  | 0.9900   |
| C3B–C4B   | 1.54(4)  |
| C4B–H4BA  | 0.9900   |
| C4B–H4BB  | 0.9900   |
| C4B–C5B   | 1.48(2)  |
| C5B–H5BA  | 0.9900   |
| C5B–H5BB  | 0.9900   |
| C5B–C6B   | 1.51(2)  |
| C6B–H6BA  | 0.9900   |
| C6B–H6BB  | 0.9900   |
| C17B–H17B | 1.0000   |
| C17B–C18B | 1.49(2)  |
| C17B–C22B | 1.53(2)  |
| C18B–H18C | 0.9900   |
| C18B–H18D | 0.9900   |
| C18B–C19B | 1.55(2)  |
| C19B–H19C | 0.9900   |
| C19B–H19D | 0.9900   |
| C19B–C20B | 1.50(3)  |
| C20B–H20C | 0.9900   |
| C20B–H20D | 0.9900   |
| C20B–C21B | 1.47(3)  |
| C21B–H21C | 0.9900   |
| C21B–H21D | 0.9900   |
| C21B–C22B | 1.53(3)  |
| C22B–H22C | 0.9900   |
| C22B–H22D | 0.9900   |
| C28B–H28C | 0.9900   |
| C28B–H28D | 0.9900   |
| C28B–C29B | 1.53(3)  |
| C29B–H29C | 0.9900   |
| C29B–H29D | 0.9900   |
| C29B–C30B | 1.51(3)  |
| C30B–H30C | 0.9900   |
| C30B–H30D | 0.9900   |
| C30B–C31B | 1.47(3)  |
| C31B–H31C | 0.9900   |
| C31B–H31D | 0.9900   |
| C31B–C32B | 1.56(3)  |
| C32B–H32C | 0.9900   |
| C32B–H32D | 0.9900   |
| C49B–H49B | 1.0000   |

|           |           |
|-----------|-----------|
| C49B–C50B | 1.50(2)   |
| C49B–C54B | 1.50(2)   |
| C50B–H50C | 0.9900    |
| C50B–H50D | 0.9900    |
| C50B–C51B | 1.54(2)   |
| C51B–H51C | 0.9900    |
| C51B–H51D | 0.9900    |
| C51B–C52B | 1.57(2)   |
| C52B–H52C | 0.9900    |
| C52B–H52D | 0.9900    |
| C52B–C53B | 1.43(3)   |
| C53B–H53C | 0.9900    |
| C53B–H53D | 0.9900    |
| C53B–C54B | 1.58(3)   |
| C54B–H54C | 0.9900    |
| C54B–H54D | 0.9900    |
| C59B–H59B | 1.0000    |
| C59B–C60B | 1.494(18) |
| C59B–C64B | 1.52(2)   |
| C60B–H60C | 0.9900    |
| C60B–H60D | 0.9900    |
| C60B–C61B | 1.51(2)   |
| C61B–H61C | 0.9900    |
| C61B–H61D | 0.9900    |
| C61B–C62B | 1.53(2)   |
| C62B–H62C | 0.9900    |
| C62B–H62D | 0.9900    |
| C62B–C63B | 1.49(2)   |
| C63B–H63C | 0.9900    |
| C63B–H63D | 0.9900    |
| C63B–C64B | 1.53(2)   |
| C64B–H64C | 0.9900    |
| C64B–H64D | 0.9900    |

| <b>Atom–Atom–Atom</b> | <b>Angle [°]</b> |
|-----------------------|------------------|
| Cu2–I1–Cu1            | 59.859(15)       |
| Cu3–I1–Cu1            | 57.731(15)       |
| Cu3–I1–Cu2            | 63.028(15)       |
| Cu2–I2–Cu1            | 60.228(15)       |
| Cu2–I2–Cu4            | 60.186(16)       |
| Cu4–I2–Cu1            | 61.863(15)       |
| Cu1–I3–Cu3            | 59.762(16)       |
| Cu1–I3–Cu4            | 61.786(15)       |
| Cu3–I3–Cu4            | 60.143(16)       |
| Cu2–I4–Cu3            | 61.867(15)       |
| Cu4–I4–Cu2            | 60.684(15)       |
| Cu4–I4–Cu3            | 60.626(16)       |
| Cu5–I5–Cu7            | 59.074(16)       |
| Cu6–I5–Cu5            | 63.403(15)       |
| Cu6–I5–Cu7            | 61.041(16)       |
| Cu6–I6–Cu5            | 62.182(15)       |
| Cu8–I6–Cu5            | 60.149(15)       |
| Cu8–I6–Cu6            | 60.390(17)       |
| Cu5–I7–Cu8            | 59.250(15)       |
| Cu7–I7–Cu5            | 60.707(16)       |
| Cu7–I7–Cu8            | 60.736(16)       |
| Cu6–I8–Cu7            | 61.712(16)       |

|                           |             |                           |             |
|---------------------------|-------------|---------------------------|-------------|
| Cu6-I8-Cu8                | 59.934(16)  | Cu4-Cu3-I4                | 57.127(16)  |
| Cu7-I8-Cu8                | 61.461(16)  | Cu4-Cu3-Cu2               | 57.982(17)  |
| I1-Cu1-Cu4                | 106.841(19) | S2 <sup>#2</sup> -Cu3-I1  | 111.80(3)   |
| I2-Cu1-I1                 | 112.103(18) | S2 <sup>#2</sup> -Cu3-I3  | 108.42(3)   |
| I2-Cu1-Cu4                | 58.250(16)  | S2 <sup>#2</sup> -Cu3-I4  | 97.21(3)    |
| I3-Cu1-I1                 | 114.576(19) | S2 <sup>#2</sup> -Cu3-Cu1 | 154.17(3)   |
| I3-Cu1-I2                 | 111.989(18) | S2 <sup>#2</sup> -Cu3-Cu2 | 141.46(3)   |
| I3-Cu1-Cu2                | 112.42(2)   | S2 <sup>#2</sup> -Cu3-Cu4 | 135.62(3)   |
| I3-Cu1-Cu3                | 60.582(16)  | I2-Cu4-I3                 | 107.298(18) |
| I3-Cu1-Cu4                | 62.687(16)  | I2-Cu4-Cu1                | 59.887(15)  |
| Cu2-Cu1-I1                | 59.325(15)  | I2-Cu4-Cu3                | 108.48(2)   |
| Cu2-Cu1-I2                | 58.617(15)  | I4-Cu4-I2                 | 114.188(19) |
| Cu2-Cu1-Cu4               | 58.434(17)  | I4-Cu4-I3                 | 113.73(2)   |
| Cu3-Cu1-I1                | 59.891(16)  | I4-Cu4-Cu1                | 107.56(2)   |
| Cu3-Cu1-I2                | 110.71(2)   | I4-Cu4-Cu2                | 60.530(16)  |
| Cu3-Cu1-Cu2               | 63.600(18)  | I4-Cu4-Cu3                | 62.248(17)  |
| Cu3-Cu1-Cu4               | 60.695(18)  | Cu1-Cu4-I3                | 55.527(15)  |
| S1-Cu1-I1                 | 105.73(3)   | Cu2-Cu4-I2                | 59.483(15)  |
| S1-Cu1-I2                 | 96.43(3)    | Cu2-Cu4-I3                | 107.07(2)   |
| S1-Cu1-I3                 | 114.51(3)   | Cu2-Cu4-Cu1               | 59.333(17)  |
| S1-Cu1-Cu2                | 132.49(3)   | Cu2-Cu4-Cu3               | 62.376(18)  |
| S1-Cu1-Cu3                | 152.37(4)   | Cu3-Cu4-I3                | 56.687(15)  |
| S1-Cu1-Cu4                | 144.55(3)   | Cu3-Cu4-Cu1               | 56.449(17)  |
| I1-Cu2-Cu1                | 60.816(15)  | S3-Cu4-I2                 | 109.13(4)   |
| I1-Cu2-Cu3                | 58.067(15)  | S3-Cu4-I3                 | 93.06(3)    |
| I2-Cu2-I1                 | 115.680(19) | S3-Cu4-I4                 | 117.23(4)   |
| I2-Cu2-I4                 | 113.387(18) | S3-Cu4-Cu1                | 133.29(4)   |
| I2-Cu2-Cu1                | 61.155(16)  | S3-Cu4-Cu2                | 158.93(4)   |
| I2-Cu2-Cu3                | 107.008(19) | S3-Cu4-Cu3                | 137.33(4)   |
| I2-Cu2-Cu4                | 60.331(16)  | I5-Cu5-I6                 | 107.885(18) |
| I4-Cu2-I1                 | 109.034(18) | I5-Cu5-Cu6                | 58.255(15)  |
| I4-Cu2-Cu1                | 108.479(19) | I5-Cu5-Cu8                | 108.52(2)   |
| I4-Cu2-Cu3                | 60.713(15)  | I6-Cu5-Cu6                | 57.681(16)  |
| I4-Cu2-Cu4                | 58.785(16)  | I7-Cu5-I5                 | 113.497(19) |
| Cu1-Cu2-Cu3               | 56.480(17)  | I7-Cu5-I6                 | 115.594(18) |
| Cu4-Cu2-I1                | 111.09(2)   | I7-Cu5-Cu6                | 109.202(19) |
| Cu4-Cu2-Cu1               | 62.233(18)  | I7-Cu5-Cu7                | 59.379(16)  |
| Cu4-Cu2-Cu3               | 59.642(18)  | I7-Cu5-Cu8                | 63.914(16)  |
| S8 <sup>#1</sup> -Cu2-I1  | 100.64(3)   | Cu7-Cu5-I5                | 60.638(16)  |
| S8 <sup>#1</sup> -Cu2-I2  | 102.60(3)   | Cu7-Cu5-I6                | 108.25(2)   |
| S8 <sup>#1</sup> -Cu2-I4  | 114.86(3)   | Cu7-Cu5-Cu6               | 59.769(18)  |
| S8 <sup>#1</sup> -Cu2-Cu1 | 136.54(3)   | Cu7-Cu5-Cu8               | 61.960(19)  |
| S8 <sup>#1</sup> -Cu2-Cu3 | 149.00(4)   | Cu8-Cu5-I6                | 57.224(16)  |
| S8 <sup>#1</sup> -Cu2-Cu4 | 148.02(3)   | Cu8-Cu5-Cu6               | 57.863(17)  |
| I1-Cu3-I4                 | 106.979(18) | S5-Cu5-I5                 | 109.54(3)   |
| I1-Cu3-Cu2                | 58.904(14)  | S5-Cu5-I6                 | 97.94(3)    |
| I1-Cu3-Cu4                | 110.36(2)   | S5-Cu5-I7                 | 111.24(3)   |
| I3-Cu3-I1                 | 115.968(19) | S5-Cu5-Cu6                | 138.99(3)   |
| I3-Cu3-I4                 | 114.96(2)   | S5-Cu5-Cu7                | 153.71(3)   |
| I3-Cu3-Cu2                | 108.71(2)   | S5-Cu5-Cu8                | 139.57(3)   |
| I3-Cu3-Cu4                | 63.171(16)  | I5-Cu6-I6                 | 110.063(19) |
| I4-Cu3-Cu2                | 57.419(15)  | I5-Cu6-Cu5                | 58.342(14)  |
| Cu1-Cu3-I1                | 62.378(16)  | I5-Cu6-Cu7                | 59.693(16)  |
| Cu1-Cu3-I3                | 59.657(16)  | I6-Cu6-Cu5                | 60.138(16)  |
| Cu1-Cu3-I4                | 108.59(2)   | I6-Cu6-Cu7                | 108.04(2)   |
| Cu1-Cu3-Cu2               | 59.920(18)  | I8-Cu6-I5                 | 112.77(2)   |
| Cu1-Cu3-Cu4               | 62.856(18)  | I8-Cu6-I6                 | 114.05(2)   |

|                           |             |                           |            |
|---------------------------|-------------|---------------------------|------------|
| I8-Cu6-Cu5                | 107.056(19) | C7-S1-C1A                 | 95.6(2)    |
| I8-Cu6-Cu7                | 59.905(16)  | C1A-S1-Cu1                | 110.20(16) |
| I8-Cu6-Cu8                | 61.317(17)  | C1B-S1-Cu1                | 112.4(4)   |
| Cu7-Cu6-Cu5               | 57.046(17)  | C1B-S1-C7                 | 121.9(5)   |
| Cu8-Cu6-I5                | 109.43(2)   | C10-S2-Cu3 <sup>#3</sup>  | 104.90(13) |
| Cu8-Cu6-I6                | 58.387(17)  | C10-S2-C11                | 100.6(2)   |
| Cu8-Cu6-Cu5               | 58.828(17)  | C11-S2-Cu3 <sup>#3</sup>  | 115.33(13) |
| Cu8-Cu6-Cu7               | 61.312(18)  | C23-S3-Cu4                | 102.42(15) |
| S4-Cu6-I5                 | 101.57(3)   | C23-S3-C17A               | 94.6(2)    |
| S4-Cu6-I6                 | 106.71(4)   | C23-S3-C17B               | 124.4(5)   |
| S4-Cu6-I8                 | 110.79(3)   | C17A-S3-Cu4               | 116.28(17) |
| S4-Cu6-Cu5                | 141.87(4)   | C17B-S3-Cu4               | 101.9(5)   |
| S4-Cu6-Cu7                | 144.57(4)   | C26-S4-Cu6                | 101.27(15) |
| S4-Cu6-Cu8                | 148.63(4)   | C27-S4-Cu6                | 110.07(16) |
| I5-Cu7-Cu6                | 59.266(15)  | C27-S4-C26                | 100.7(3)   |
| I5-Cu7-Cu8                | 106.67(2)   | C33-S5-Cu5                | 113.89(13) |
| I7-Cu7-I5                 | 113.66(2)   | C39-S5-Cu5                | 103.48(14) |
| I7-Cu7-I8                 | 114.63(2)   | C39-S5-C33                | 99.9(2)    |
| I7-Cu7-Cu5                | 59.914(16)  | C42-S6-Cu7 <sup>#3</sup>  | 104.39(15) |
| I7-Cu7-Cu6                | 112.45(2)   | C43-S6-Cu7 <sup>#3</sup>  | 110.49(14) |
| I7-Cu7-Cu8                | 63.332(17)  | C43-S6-C42                | 104.2(2)   |
| I8-Cu7-I5                 | 111.063(19) | C55-S7-Cu8                | 99.74(15)  |
| I8-Cu7-Cu6                | 58.383(16)  | C55-S7-C49A               | 107.8(3)   |
| I8-Cu7-Cu8                | 59.751(17)  | C55-S7-C49B               | 82.3(6)    |
| Cu5-Cu7-I5                | 60.288(16)  | C49A-S7-Cu8               | 109.17(18) |
| Cu5-Cu7-I8                | 110.86(2)   | C49B-S7-Cu8               | 117.9(5)   |
| Cu5-Cu7-Cu6               | 63.185(19)  | C58-S8-Cu2 <sup>#4</sup>  | 104.81(15) |
| Cu5-Cu7-Cu8               | 59.898(18)  | C58-S8-C59A               | 108.6(3)   |
| Cu6-Cu7-Cu8               | 58.318(18)  | C58-S8-C59B               | 86.6(5)    |
| S6 <sup>#2</sup> -Cu7-I5  | 111.74(3)   | C59A-S8-Cu2 <sup>#4</sup> | 105.76(18) |
| S6 <sup>#2</sup> -Cu7-I7  | 107.47(3)   | S1-C7-H7A                 | 109.0      |
| S6 <sup>#2</sup> -Cu7-I8  | 97.02(4)    | S1-C7-H7B                 | 109.0      |
| S6 <sup>#2</sup> -Cu7-Cu5 | 152.07(4)   | H7A-C7-H7B                | 107.8      |
| S6 <sup>#2</sup> -Cu7-Cu6 | 139.08(4)   | C8-C7-S1                  | 113.0(3)   |
| S6 <sup>#2</sup> -Cu7-Cu8 | 140.47(4)   | C8-C7-H7A                 | 109.0      |
| I6-Cu8-I7                 | 114.09(2)   | C8-C7-H7B                 | 109.0      |
| I6-Cu8-I8                 | 114.29(2)   | C9-C8-C7                  | 174.3(5)   |
| I6-Cu8-Cu5                | 62.627(17)  | C8-C9-C10                 | 172.3(5)   |
| I6-Cu8-Cu6                | 61.223(17)  | S2-C10-H10A               | 110.0      |
| I6-Cu8-Cu7                | 109.53(2)   | S2-C10-H10B               | 110.0      |
| I8-Cu8-I7                 | 107.44(2)   | C9-C10-S2                 | 108.4(3)   |
| I8-Cu8-Cu7                | 58.788(17)  | C9-C10-H10A               | 110.0      |
| Cu5-Cu8-I7                | 56.836(15)  | C9-C10-H10B               | 110.0      |
| Cu5-Cu8-I8                | 108.55(2)   | H10A-C10-H10B             | 108.4      |
| Cu5-Cu8-Cu7               | 58.142(18)  | S2-C11-H11                | 107.9      |
| Cu6-Cu8-I7                | 107.92(2)   | C12-C11-S2                | 108.6(3)   |
| Cu6-Cu8-I8                | 58.749(17)  | C12-C11-H11               | 107.9      |
| Cu6-Cu8-Cu5               | 63.309(18)  | C12-C11-C16               | 112.1(4)   |
| Cu6-Cu8-Cu7               | 60.369(19)  | C16-C11-S2                | 112.3(3)   |
| Cu7-Cu8-I7                | 55.931(15)  | C16-C11-H11               | 107.9      |
| S7-Cu8-I6                 | 115.42(4)   | C11-C12-H12A              | 109.6      |
| S7-Cu8-I7                 | 93.70(3)    | C11-C12-H12B              | 109.6      |
| S7-Cu8-I8                 | 109.90(3)   | C11-C12-C13               | 110.5(5)   |
| S7-Cu8-Cu5                | 137.15(4)   | H12A-C12-H12B             | 108.1      |
| S7-Cu8-Cu6                | 157.63(3)   | C13-C12-H12A              | 109.6      |
| S7-Cu8-Cu7                | 133.40(4)   | C13-C12-H12B              | 109.6      |
| C7-S1-Cu1                 | 99.20(14)   | C12-C13-H13A              | 109.5      |

|               |           |               |          |
|---------------|-----------|---------------|----------|
| C12-C13-H13B  | 109.5     | C33-C34-C35   | 110.1(4) |
| H13A-C13-H13B | 108.1     | H34A-C34-H34B | 108.1    |
| C14-C13-C12   | 110.8(5)  | C35-C34-H34A  | 109.6    |
| C14-C13-H13A  | 109.5     | C35-C34-H34B  | 109.6    |
| C14-C13-H13B  | 109.5     | C34-C35-H35A  | 109.3    |
| C13-C14-H14A  | 109.0     | C34-C35-H35B  | 109.3    |
| C13-C14-H14B  | 109.0     | H35A-C35-H35B | 108.0    |
| H14A-C14-H14B | 107.8     | C36-C35-C34   | 111.7(4) |
| C15-C14-C13   | 112.7(5)  | C36-C35-H35A  | 109.3    |
| C15-C14-H14A  | 109.0     | C36-C35-H35B  | 109.3    |
| C15-C14-H14B  | 109.0     | C35-C36-H36A  | 109.4    |
| C14-C15-H15A  | 109.4     | C35-C36-H36B  | 109.4    |
| C14-C15-H15B  | 109.4     | C35-C36-C37   | 111.0(4) |
| C14-C15-C16   | 111.1(5)  | H36A-C36-H36B | 108.0    |
| H15A-C15-H15B | 108.0     | C37-C36-H36A  | 109.4    |
| C16-C15-H15A  | 109.4     | C37-C36-H36B  | 109.4    |
| C16-C15-H15B  | 109.4     | C36-C37-H37A  | 109.4    |
| C11-C16-C15   | 109.6(4)  | C36-C37-H37B  | 109.4    |
| C11-C16-H16A  | 109.8     | C36-C37-C38   | 111.3(5) |
| C11-C16-H16B  | 109.8     | H37A-C37-H37B | 108.0    |
| C15-C16-H16A  | 109.8     | C38-C37-H37A  | 109.4    |
| C15-C16-H16B  | 109.8     | C38-C37-H37B  | 109.4    |
| H16A-C16-H16B | 108.2     | C33-C38-C37   | 110.1(4) |
| S3-C23-H23A   | 109.3     | C33-C38-H38A  | 109.6    |
| S3-C23-H23B   | 109.3     | C33-C38-H38B  | 109.6    |
| H23A-C23-H23B | 107.9     | C37-C38-H38A  | 109.6    |
| C24-C23-S3    | 111.7(3)  | C37-C38-H38B  | 109.6    |
| C24-C23-H23A  | 109.3     | H38A-C38-H38B | 108.2    |
| C24-C23-H23B  | 109.3     | S5-C39-H39A   | 109.6    |
| C25-C24-C23   | 175.9(5)  | S5-C39-H39B   | 109.6    |
| C24-C25-C26   | 176.8(5)  | H39A-C39-H39B | 108.1    |
| S4-C26-H26A   | 108.9     | C40-C39-S5    | 110.2(3) |
| S4-C26-H26B   | 108.9     | C40-C39-H39A  | 109.6    |
| C25-C26-S4    | 113.5(4)  | C40-C39-H39B  | 109.6    |
| C25-C26-H26A  | 108.9     | C41-C40-C39   | 174.2(5) |
| C25-C26-H26B  | 108.9     | C40-C41-C42   | 175.1(5) |
| H26A-C26-H26B | 107.7     | S6-C42-H42A   | 109.5    |
| S4-C27-H27    | 106.1     | S6-C42-H42B   | 109.5    |
| S4-C27-H27A   | 103.1     | C41-C42-S6    | 110.9(3) |
| C28A-C27-S4   | 115.0(4)  | C41-C42-H42A  | 109.5    |
| C28A-C27-H27  | 106.1     | C41-C42-H42B  | 109.5    |
| C28A-C27-C32A | 113.1(5)  | H42A-C42-H42B | 108.0    |
| C32A-C27-S4   | 109.8(4)  | S6-C43-H43    | 106.4    |
| C32A-C27-H27  | 106.1     | C44-C43-S6    | 111.4(3) |
| C28B-C27-S4   | 104.9(8)  | C44-C43-H43   | 106.4    |
| C28B-C27-H27A | 103.1     | C48-C43-S6    | 114.1(3) |
| C32B-C27-S4   | 125.7(9)  | C48-C43-H43   | 106.4    |
| C32B-C27-H27A | 103.1     | C48-C43-C44   | 111.6(4) |
| C32B-C27-C28B | 114.2(12) | C43-C44-H44A  | 109.6    |
| S5-C33-H33    | 107.8     | C43-C44-H44B  | 109.6    |
| C34-C33-S5    | 108.7(3)  | H44A-C44-H44B | 108.1    |
| C34-C33-H33   | 107.8     | C45-C44-C43   | 110.4(5) |
| C38-C33-S5    | 113.4(3)  | C45-C44-H44A  | 109.6    |
| C38-C33-H33   | 107.8     | C45-C44-H44B  | 109.6    |
| C38-C33-C34   | 111.2(4)  | C44-C45-H45A  | 109.4    |
| C33-C34-H34A  | 109.6     | C44-C45-H45B  | 109.4    |
| C33-C34-H34B  | 109.6     | C44-C45-C46   | 111.4(4) |

|               |           |                |          |
|---------------|-----------|----------------|----------|
| H45A-C45-H45B | 108.0     | C5A-C4A-H4AA   | 109.6    |
| C46-C45-H45A  | 109.4     | C5A-C4A-H4AB   | 109.6    |
| C46-C45-H45B  | 109.4     | C4A-C5A-H5AA   | 109.2    |
| C45-C46-H46A  | 109.3     | C4A-C5A-H5AB   | 109.2    |
| C45-C46-H46B  | 109.3     | H5AA-C5A-H5AB  | 107.9    |
| H46A-C46-H46B | 108.0     | C6A-C5A-C4A    | 112.0(5) |
| C47-C46-C45   | 111.4(4)  | C6A-C5A-H5AA   | 109.2    |
| C47-C46-H46A  | 109.3     | C6A-C5A-H5AB   | 109.2    |
| C47-C46-H46B  | 109.3     | C1A-C6A-H6AA   | 109.5    |
| C46-C47-H47A  | 109.4     | C1A-C6A-H6AB   | 109.5    |
| C46-C47-H47B  | 109.4     | C5A-C6A-C1A    | 110.5(6) |
| C46-C47-C48   | 111.0(5)  | C5A-C6A-H6AA   | 109.5    |
| H47A-C47-H47B | 108.0     | C5A-C6A-H6AB   | 109.5    |
| C48-C47-H47A  | 109.4     | H6AA-C6A-H6AB  | 108.1    |
| C48-C47-H47B  | 109.4     | S3-C17A-H17A   | 108.3    |
| C43-C48-C47   | 111.3(4)  | C18A-C17A-S3   | 114.9(4) |
| C43-C48-H48A  | 109.4     | C18A-C17A-H17A | 108.3    |
| C43-C48-H48B  | 109.4     | C18A-C17A-C22A | 111.1(5) |
| C47-C48-H48A  | 109.4     | C22A-C17A-S3   | 105.8(4) |
| C47-C48-H48B  | 109.4     | C22A-C17A-H17A | 108.3    |
| H48A-C48-H48B | 108.0     | C17A-C18A-H18A | 109.3    |
| S7-C55-H55A   | 108.5     | C17A-C18A-H18B | 109.3    |
| S7-C55-H55B   | 108.5     | C17A-C18A-C19A | 111.5(5) |
| H55A-C55-H55B | 107.5     | H18A-C18A-H18B | 108.0    |
| C56-C55-S7    | 115.1(4)  | C19A-C18A-H18A | 109.3    |
| C56-C55-H55A  | 108.5     | C19A-C18A-H18B | 109.3    |
| C56-C55-H55B  | 108.5     | C18A-C19A-H19A | 109.4    |
| C57-C56-C55   | 177.4(5)  | C18A-C19A-H19B | 109.4    |
| C56-C57-C58   | 177.6(5)  | H19A-C19A-H19B | 108.0    |
| S8-C58-H58A   | 109.0     | C20A-C19A-C18A | 111.3(6) |
| S8-C58-H58B   | 109.0     | C20A-C19A-H19A | 109.4    |
| C57-C58-S8    | 112.8(4)  | C20A-C19A-H19B | 109.4    |
| C57-C58-H58A  | 109.0     | C19A-C20A-H20A | 109.3    |
| C57-C58-H58B  | 109.0     | C19A-C20A-H20B | 109.3    |
| H58A-C58-H58B | 107.8     | C19A-C20A-C21A | 111.6(6) |
| S1-C1A-H1A    | 109.0     | H20A-C20A-H20B | 108.0    |
| C2A-C1A-S1    | 108.9(4)  | C21A-C20A-H20A | 109.3    |
| C2A-C1A-H1A   | 109.0     | C21A-C20A-H20B | 109.3    |
| C2A-C1A-C6A   | 111.5(5)  | C20A-C21A-H21A | 109.5    |
| C6A-C1A-S1    | 109.4(4)  | C20A-C21A-H21B | 109.5    |
| C6A-C1A-H1A   | 109.0     | C20A-C21A-C22A | 110.6(6) |
| C1A-C2A-H2AA  | 109.7     | H21A-C21A-H21B | 108.1    |
| C1A-C2A-H2AB  | 109.7     | C22A-C21A-H21A | 109.5    |
| C1A-C2A-C3A   | 110.1(7)  | C22A-C21A-H21B | 109.5    |
| H2AA-C2A-H2AB | 108.2     | C17A-C22A-C21A | 109.9(5) |
| C3A-C2A-H2AA  | 109.6     | C17A-C22A-H22A | 109.7    |
| C3A-C2A-H2AB  | 109.7     | C17A-C22A-H22B | 109.7    |
| C2A-C3A-H3AA  | 109.5     | C21A-C22A-H22A | 109.7    |
| C2A-C3A-H3AB  | 109.5     | C21A-C22A-H22B | 109.7    |
| H3AA-C3A-H3AB | 108.1     | H22A-C22A-H22B | 108.2    |
| C4A-C3A-C2A   | 110.6(10) | C27-C28A-H28A  | 109.3    |
| C4A-C3A-H3AA  | 109.5     | C27-C28A-H28B  | 109.3    |
| C4A-C3A-H3AB  | 109.5     | C27-C28A-C29A  | 111.7(6) |
| C3A-C4A-H4AA  | 109.6     | H28A-C28A-H28B | 107.9    |
| C3A-C4A-H4AB  | 109.6     | C29A-C28A-H28A | 109.3    |
| C3A-C4A-C5A   | 110.1(7)  | C29A-C28A-H28B | 109.3    |
| H4AA-C4A-H4AB | 108.1     | C28A-C29A-H29A | 108.9    |



|                |          |                |           |
|----------------|----------|----------------|-----------|
| C28A-C29A-H29B | 108.9    | C53A-C54A-H54B | 109.5     |
| H29A-C29A-H29B | 107.7    | H54A-C54A-H54B | 108.1     |
| C30A-C29A-C28A | 113.5(7) | S8-C59A-H59A   | 107.0     |
| C30A-C29A-H29A | 108.9    | C60A-C59A-S8   | 111.1(4)  |
| C30A-C29A-H29B | 108.9    | C60A-C59A-H59A | 107.0     |
| C29A-C30A-H30A | 109.4    | C60A-C59A-C64A | 111.7(5)  |
| C29A-C30A-H30B | 109.4    | C64A-C59A-S8   | 112.7(4)  |
| C29A-C30A-C31A | 111.2(6) | C64A-C59A-H59A | 107.0     |
| H30A-C30A-H30B | 108.0    | C59A-C60A-H60A | 109.6     |
| C31A-C30A-H30A | 109.4    | C59A-C60A-H60B | 109.6     |
| C31A-C30A-H30B | 109.4    | C59A-C60A-C61A | 110.1(5)  |
| C30A-C31A-H31A | 109.8    | H60A-C60A-H60B | 108.2     |
| C30A-C31A-H31B | 109.8    | C61A-C60A-H60A | 109.6     |
| H31A-C31A-H31B | 108.3    | C61A-C60A-H60B | 109.6     |
| C32A-C31A-C30A | 109.3(7) | C60A-C61A-H61A | 109.1     |
| C32A-C31A-H31A | 109.8    | C60A-C61A-H61B | 109.1     |
| C32A-C31A-H31B | 109.8    | H61A-C61A-H61B | 107.9     |
| C27-C32A-C31A  | 110.5(7) | C62A-C61A-C60A | 112.3(6)  |
| C27-C32A-H32A  | 109.6    | C62A-C61A-H61A | 109.1     |
| C27-C32A-H32B  | 109.6    | C62A-C61A-H61B | 109.1     |
| C31A-C32A-H32A | 109.6    | C61A-C62A-H62A | 109.5     |
| C31A-C32A-H32B | 109.6    | C61A-C62A-H62B | 109.5     |
| H32A-C32A-H32B | 108.1    | C61A-C62A-C63A | 110.5(6)  |
| S7-C49A-H49A   | 105.9    | H62A-C62A-H62B | 108.1     |
| C50A-C49A-S7   | 114.9(5) | C63A-C62A-H62A | 109.5     |
| C50A-C49A-H49A | 105.9    | C63A-C62A-H62B | 109.5     |
| C50A-C49A-C54A | 112.8(5) | C62A-C63A-H63A | 109.4     |
| C54A-C49A-S7   | 110.8(4) | C62A-C63A-H63B | 109.4     |
| C54A-C49A-H49A | 105.9    | C62A-C63A-C64A | 111.1(6)  |
| C49A-C50A-H50A | 109.3    | H63A-C63A-H63B | 108.0     |
| C49A-C50A-H50B | 109.3    | C64A-C63A-H63A | 109.4     |
| C49A-C50A-C51A | 111.4(7) | C64A-C63A-H63B | 109.4     |
| H50A-C50A-H50B | 108.0    | C59A-C64A-C63A | 110.3(5)  |
| C51A-C50A-H50A | 109.3    | C59A-C64A-H64A | 109.6     |
| C51A-C50A-H50B | 109.3    | C59A-C64A-H64B | 109.6     |
| C50A-C51A-H51A | 109.7    | C63A-C64A-H64A | 109.6     |
| C50A-C51A-H51B | 109.7    | C63A-C64A-H64B | 109.6     |
| H51A-C51A-H51B | 108.2    | H64A-C64A-H64B | 108.1     |
| C52A-C51A-C50A | 109.9(6) | S1-C1B-H1B     | 107.4     |
| C52A-C51A-H51A | 109.7    | C2B-C1B-S1     | 108.7(10) |
| C52A-C51A-H51B | 109.7    | C2B-C1B-H1B    | 107.4     |
| C51A-C52A-H52A | 109.6    | C2B-C1B-C6B    | 112.6(13) |
| C51A-C52A-H52B | 109.6    | C6B-C1B-S1     | 113.0(10) |
| H52A-C52A-H52B | 108.1    | C6B-C1B-H1B    | 107.4     |
| C53A-C52A-C51A | 110.3(7) | C1B-C2B-H2BA   | 109.8     |
| C53A-C52A-H52A | 109.6    | C1B-C2B-H2BB   | 109.8     |
| C53A-C52A-H52B | 109.6    | C1B-C2B-C3B    | 109(2)    |
| C52A-C53A-H53A | 109.2    | H2BA-C2B-H2BB  | 108.3     |
| C52A-C53A-H53B | 109.2    | C3B-C2B-H2BA   | 109.8     |
| C52A-C53A-C54A | 111.8(5) | C3B-C2B-H2BB   | 109.8     |
| H53A-C53A-H53B | 107.9    | C2B-C3B-H3BA   | 109.3     |
| C54A-C53A-H53A | 109.2    | C2B-C3B-H3BB   | 109.3     |
| C54A-C53A-H53B | 109.2    | C2B-C3B-C4B    | 112(3)    |
| C49A-C54A-C53A | 110.6(5) | H3BA-C3B-H3BB  | 108.0     |
| C49A-C54A-H54A | 109.5    | C4B-C3B-H3BA   | 109.3     |
| C49A-C54A-H54B | 109.5    | C4B-C3B-H3BB   | 109.3     |
| C53A-C54A-H54A | 109.5    | C3B-C4B-H4BA   | 110.0     |

|                |           |                |           |
|----------------|-----------|----------------|-----------|
| C3B-C4B-H4BB   | 110.0     | C29B-C28B-H28C | 108.8     |
| H4BA-C4B-H4BB  | 108.3     | C29B-C28B-H28D | 108.8     |
| C5B-C4B-C3B    | 109(3)    | C28B-C29B-H29C | 109.8     |
| C5B-C4B-H4BA   | 110.0     | C28B-C29B-H29D | 109.8     |
| C5B-C4B-H4BB   | 110.0     | H29C-C29B-H29D | 108.2     |
| C4B-C5B-H5BA   | 109.4     | C30B-C29B-C28B | 110(2)    |
| C4B-C5B-H5BB   | 109.4     | C30B-C29B-H29C | 109.8     |
| C4B-C5B-C6B    | 111.0(16) | C30B-C29B-H29D | 109.8     |
| H5BA-C5B-H5BB  | 108.0     | C29B-C30B-H30C | 108.5     |
| C6B-C5B-H5BA   | 109.4     | C29B-C30B-H30D | 108.5     |
| C6B-C5B-H5BB   | 109.4     | H30C-C30B-H30D | 107.5     |
| C1B-C6B-H6BA   | 109.3     | C31B-C30B-C29B | 115(2)    |
| C1B-C6B-H6BB   | 109.3     | C31B-C30B-H30C | 108.5     |
| C5B-C6B-C1B    | 111.7(14) | C31B-C30B-H30D | 108.5     |
| C5B-C6B-H6BA   | 109.3     | C30B-C31B-H31C | 110.6     |
| C5B-C6B-H6BB   | 109.3     | C30B-C31B-H31D | 110.6     |
| H6BA-C6B-H6BB  | 107.9     | C30B-C31B-C32B | 106(2)    |
| S3-C17B-H17B   | 109.1     | H31C-C31B-H31D | 108.8     |
| C18B-C17B-S3   | 110.1(11) | C32B-C31B-H31C | 110.6     |
| C18B-C17B-H17B | 109.1     | C32B-C31B-H31D | 110.6     |
| C18B-C17B-C22B | 114.6(13) | C27-C32B-C31B  | 113.9(17) |
| C22B-C17B-S3   | 104.8(10) | C27-C32B-H32C  | 108.8     |
| C22B-C17B-H17B | 109.1     | C27-C32B-H32D  | 108.8     |
| C17B-C18B-H18C | 109.7     | C31B-C32B-H32C | 108.8     |
| C17B-C18B-H18D | 109.7     | C31B-C32B-H32D | 108.8     |
| C17B-C18B-C19B | 109.8(14) | H32C-C32B-H32D | 107.7     |
| H18C-C18B-H18D | 108.2     | S7-C49B-H49B   | 109.1     |
| C19B-C18B-H18C | 109.7     | C50B-C49B-S7   | 118.6(11) |
| C19B-C18B-H18D | 109.7     | C50B-C49B-H49B | 109.1     |
| C18B-C19B-H19C | 109.8     | C54B-C49B-S7   | 98.4(12)  |
| C18B-C19B-H19D | 109.8     | C54B-C49B-H49B | 109.1     |
| H19C-C19B-H19D | 108.2     | C54B-C49B-C50B | 112.0(15) |
| C20B-C19B-C18B | 109.5(17) | C49B-C50B-H50C | 109.7     |
| C20B-C19B-H19C | 109.8     | C49B-C50B-H50D | 109.7     |
| C20B-C19B-H19D | 109.8     | C49B-C50B-C51B | 109.8(14) |
| C19B-C20B-H20C | 108.7     | H50C-C50B-H50D | 108.2     |
| C19B-C20B-H20D | 108.7     | C51B-C50B-H50C | 109.7     |
| H20C-C20B-H20D | 107.6     | C51B-C50B-H50D | 109.7     |
| C21B-C20B-C19B | 114(2)    | C50B-C51B-H51C | 109.1     |
| C21B-C20B-H20C | 108.7     | C50B-C51B-H51D | 109.1     |
| C21B-C20B-H20D | 108.7     | C50B-C51B-C52B | 112.4(16) |
| C20B-C21B-H21C | 109.3     | H51C-C51B-H51D | 107.9     |
| C20B-C21B-H21D | 109.3     | C52B-C51B-H51C | 109.1     |
| C20B-C21B-C22B | 111.8(19) | C52B-C51B-H51D | 109.1     |
| H21C-C21B-H21D | 107.9     | C51B-C52B-H52C | 108.6     |
| C22B-C21B-H21C | 109.3     | C51B-C52B-H52D | 108.6     |
| C22B-C21B-H21D | 109.3     | H52C-C52B-H52D | 107.6     |
| C17B-C22B-C21B | 109.5(15) | C53B-C52B-C51B | 114.5(19) |
| C17B-C22B-H22C | 109.8     | C53B-C52B-H52C | 108.6     |
| C17B-C22B-H22D | 109.8     | C53B-C52B-H52D | 108.6     |
| C21B-C22B-H22C | 109.8     | C52B-C53B-H53C | 109.5     |
| C21B-C22B-H22D | 109.8     | C52B-C53B-H53D | 109.5     |
| H22C-C22B-H22D | 108.2     | C52B-C53B-C54B | 111(2)    |
| C27-C28B-H28C  | 108.8     | H53C-C53B-H53D | 108.1     |
| C27-C28B-H28D  | 108.8     | C54B-C53B-H53C | 109.5     |
| H28C-C28B-H28D | 107.7     | C54B-C53B-H53D | 109.5     |
| C29B-C28B-C27  | 113.8(16) | C49B-C54B-C53B | 115.0(18) |

|                |           |                |           |
|----------------|-----------|----------------|-----------|
| C49B–C54B–H54C | 108.5     | C62B–C61B–H61D | 109.6     |
| C49B–C54B–H54D | 108.5     | C61B–C62B–H62C | 109.2     |
| C53B–C54B–H54C | 108.5     | C61B–C62B–H62D | 109.2     |
| C53B–C54B–H54D | 108.5     | H62C–C62B–H62D | 107.9     |
| H54C–C54B–H54D | 107.5     | C63B–C62B–C61B | 112.2(14) |
| S8–C59B–H59B   | 109.4     | C63B–C62B–H62C | 109.2     |
| C60B–C59B–S8   | 105.0(9)  | C63B–C62B–H62D | 109.2     |
| C60B–C59B–H59B | 109.4     | C62B–C63B–H63C | 109.2     |
| C60B–C59B–C64B | 112.9(12) | C62B–C63B–H63D | 109.2     |
| C64B–C59B–S8   | 110.6(10) | C62B–C63B–C64B | 111.8(13) |
| C64B–C59B–H59B | 109.4     | H63C–C63B–H63D | 107.9     |
| C59B–C60B–H60C | 109.2     | C64B–C63B–H63C | 109.2     |
| C59B–C60B–H60D | 109.2     | C64B–C63B–H63D | 109.2     |
| C59B–C60B–C61B | 112.0(12) | C59B–C64B–C63B | 110.5(13) |
| H60C–C60B–H60D | 107.9     | C59B–C64B–H64C | 109.5     |
| C61B–C60B–H60C | 109.2     | C59B–C64B–H64D | 109.5     |
| C61B–C60B–H60D | 109.2     | C63B–C64B–H64C | 109.5     |
| C60B–C61B–H61C | 109.6     | C63B–C64B–H64D | 109.5     |
| C60B–C61B–H61D | 109.6     | H64C–C64B–H64D | 108.1     |
| C60B–C61B–C62B | 110.2(14) |                |           |
| H61C–C61B–H61D | 108.1     |                |           |
| C62B–C61B–H61C | 109.6     |                |           |

Symmetry transformations used to generate equivalent atoms:  
#1: -1+X, -1+Y, -1+Z; #2: 1+X, +Y, +Z; #3: -1+X, +Y, +Z; #4:  
1+X, 1+Y, 1+Z;

**Table S12. Torsion angles for CP1\_150K**

| <b>Atom–Atom–Atom–Atom</b>      | <b>Torsion Angle [°]</b> |                   |            |
|---------------------------------|--------------------------|-------------------|------------|
| Cu1–S1–C7–C8                    | -159.2(3)                | Cu8–S7–C49B–C50B  | -23.5(16)  |
| Cu1–S1–C1A–C2A                  | 51.8(4)                  | Cu8–S7–C49B–C54B  | 97.3(11)   |
| Cu1–S1–C1A–C6A                  | 173.9(4)                 | S1–C1A–C2A–C3A    | 177.9(6)   |
| Cu1–S1–C1B–C2B                  | -52.7(12)                | S1–C1A–C6A–C5A    | -175.5(5)  |
| Cu1–S1–C1B–C6B                  | -178.4(10)               | S1–C1B–C2B–C3B    | -179(2)    |
| Cu2 <sup>#1</sup> –S8–C58–C57   | 158.9(3)                 | S1–C1B–C6B–C5B    | 177.6(12)  |
| Cu2 <sup>#1</sup> –S8–C59A–C60A | 174.5(4)                 | S2–C11–C12–C13    | -178.7(3)  |
| Cu2 <sup>#1</sup> –S8–C59A–C64A | 48.2(5)                  | S2–C11–C16–C15    | -179.3(4)  |
| Cu2 <sup>#1</sup> –S8–C59B–C60B | -98.6(9)                 | S3–C17A–C18A–C19A | -176.0(4)  |
| Cu2 <sup>#1</sup> –S8–C59B–C64B | 23.5(12)                 | S3–C17A–C22A–C21A | -178.2(5)  |
| Cu3 <sup>#2</sup> –S2–C10–C9    | 158.4(3)                 | S3–C17B–C18B–C19B | 172.8(12)  |
| Cu3 <sup>#2</sup> –S2–C11–C12   | -90.2(3)                 | S3–C17B–C22B–C21B | -173.8(13) |
| Cu3 <sup>#2</sup> –S2–C11–C16   | 34.4(4)                  | S4–C27–C28A–C29A  | 179.3(5)   |
| Cu4–S3–C23–C24                  | 151.1(3)                 | S4–C27–C32A–C31A  | -174.3(6)  |
| Cu4–S3–C17A–C18A                | 31.5(5)                  | S4–C27–C28B–C29B  | 174.3(15)  |
| Cu4–S3–C17A–C22A                | -91.5(4)                 | S4–C27–C32B–C31B  | -176.6(13) |
| Cu5–S5–C33–C34                  | 85.0(3)                  | S5–C33–C34–C35    | 177.5(3)   |
| Cu5–S5–C33–C38                  | -39.2(4)                 | S5–C33–C38–C37    | 179.4(4)   |
| Cu5–S5–C39–C40                  | -172.1(3)                | S6–C43–C44–C45    | 175.4(3)   |
| Cu6–S4–C26–C25                  | -165.2(3)                | S6–C43–C48–C47    | -177.4(3)  |
| Cu6–S4–C27–C28A                 | 174.5(4)                 | S7–C49A–C50A–C51A | 178.1(6)   |
| Cu6–S4–C27–C32A                 | 45.7(5)                  | S7–C49A–C54A–C53A | -177.2(4)  |
| Cu6–S4–C27–C28B                 | 99.2(9)                  | S7–C49B–C50B–C51B | 168.0(12)  |
| Cu6–S4–C27–C32B                 | -36.3(12)                | S7–C49B–C54B–C53B | -178.3(17) |
| Cu7 <sup>#2</sup> –S6–C42–C41   | 139.3(3)                 | S8–C59A–C60A–C61A | 178.6(5)   |
| Cu7 <sup>#2</sup> –S6–C43–C44   | 172.4(3)                 | S8–C59A–C64A–C63A | -178.5(5)  |
| Cu7 <sup>#2</sup> –S6–C43–C48   | 44.9(3)                  | S8–C59B–C60B–C61B | 175.8(11)  |
| Cu8–S7–C55–C56                  | -156.1(3)                | S8–C59B–C64B–C63B | -170.6(10) |
| Cu8–S7–C49A–C50A                | -41.6(6)                 | C7–S1–C1A–C2A     | 153.8(4)   |
| Cu8–S7–C49A–C54A                | -170.8(4)                | C7–S1–C1A–C6A     | -84.1(4)   |
|                                 |                          | C7–S1–C1B–C2B     | 64.8(12)   |
|                                 |                          | C7–S1–C1B–C6B     | -60.9(12)  |

|                     |            |                     |           |
|---------------------|------------|---------------------|-----------|
| C10-S2-C11-C12      | 157.6(3)   | C22A-C17A-C18A-C19A | -55.9(7)  |
| C10-S2-C11-C16      | -77.8(4)   | C28A-C27-C32A-C31A  | 55.9(9)   |
| C11-S2-C10-C9       | -81.6(3)   | C28A-C29A-C30A-C31A | -54.4(12) |
| C11-C12-C13-C14     | -54.4(7)   | C29A-C30A-C31A-C32A | 55.1(13)  |
| C12-C11-C16-C15     | -56.8(6)   | C30A-C31A-C32A-C27  | -54.8(11) |
| C12-C13-C14-C15     | 54.9(8)    | C32A-C27-C28A-C29A  | -53.5(9)  |
| C13-C14-C15-C16     | -55.7(7)   | C49A-S7-C55-C56     | 90.0(4)   |
| C14-C15-C16-C11     | 55.5(7)    | C49A-C50A-C51A-C52A | 55.9(11)  |
| C16-C11-C12-C13     | 56.7(5)    | C50A-C49A-C54A-C53A | 52.5(8)   |
| C23-S3-C17A-C18A    | -74.8(4)   | C50A-C51A-C52A-C53A | -58.1(11) |
| C23-S3-C17A-C22A    | 162.3(4)   | C51A-C52A-C53A-C54A | 58.5(9)   |
| C26-S4-C27-C28A     | -79.2(5)   | C52A-C53A-C54A-C49A | -54.8(8)  |
| C26-S4-C27-C32A     | 152.0(5)   | C54A-C49A-C50A-C51A | -53.7(9)  |
| C26-S4-C27-C28B     | -154.5(9)  | C59A-S8-C58-C57     | -88.4(4)  |
| C26-S4-C27-C32B     | 70.0(12)   | C59A-C60A-C61A-C62A | 55.6(8)   |
| C27-S4-C26-C25      | 81.6(4)    | C60A-C59A-C64A-C63A | 55.6(8)   |
| C27-C28A-C29A-C30A  | 53.6(10)   | C60A-C61A-C62A-C63A | -56.8(9)  |
| C27-C28B-C29B-C30B  | 44(3)      | C61A-C62A-C63A-C64A | 57.0(8)   |
| C33-S5-C39-C40      | 70.2(4)    | C62A-C63A-C64A-C59A | -56.3(9)  |
| C33-C34-C35-C36     | 56.7(5)    | C64A-C59A-C60A-C61A | -54.6(8)  |
| C34-C33-C38-C37     | 56.5(6)    | C1B-S1-C7-C8        | 77.0(6)   |
| C34-C35-C36-C37     | -56.4(6)   | C1B-C2B-C3B-C4B     | 57(4)     |
| C35-C36-C37-C38     | 55.7(6)    | C2B-C1B-C6B-C5B     | 54.0(19)  |
| C36-C37-C38-C33     | -55.8(7)   | C2B-C3B-C4B-C5B     | -60(4)    |
| C38-C33-C34-C35     | -57.0(5)   | C3B-C4B-C5B-C6B     | 59(3)     |
| C39-S5-C33-C34      | -165.4(3)  | C4B-C5B-C6B-C1B     | -57(2)    |
| C39-S5-C33-C38      | 70.4(4)    | C6B-C1B-C2B-C3B     | -53(2)    |
| C42-S6-C43-C44      | 60.8(3)    | C17B-S3-C23-C24     | -94.8(6)  |
| C42-S6-C43-C48      | -66.7(3)   | C17B-C18B-C19B-C20B | -54(2)    |
| C43-S6-C42-C41      | -104.8(4)  | C18B-C17B-C22B-C21B | -53(2)    |
| C43-C44-C45-C46     | 56.1(6)    | C18B-C19B-C20B-C21B | 57(3)     |
| C44-C43-C48-C47     | 55.3(5)    | C19B-C20B-C21B-C22B | -56(3)    |
| C44-C45-C46-C47     | -56.4(7)   | C20B-C21B-C22B-C17B | 51(2)     |
| C45-C46-C47-C48     | 55.0(6)    | C22B-C17B-C18B-C19B | 55(2)     |
| C46-C47-C48-C43     | -54.6(5)   | C28B-C27-C32B-C31B  | 51(2)     |
| C48-C43-C44-C45     | -55.8(5)   | C28B-C29B-C30B-C31B | -56(3)    |
| C55-S7-C49A-C50A    | 65.9(6)    | C29B-C30B-C31B-C32B | 61(3)     |
| C55-S7-C49A-C54A    | -63.3(5)   | C30B-C31B-C32B-C27  | -58(3)    |
| C55-S7-C49B-C50B    | 73.5(14)   | C32B-C27-C28B-C29B  | -44(2)    |
| C55-S7-C49B-C54B    | -165.7(12) | C49B-S7-C55-C56     | 86.8(6)   |
| C58-S8-C59A-C60A    | 62.5(5)    | C49B-C50B-C51B-C52B | -54(2)    |
| C58-S8-C59A-C64A    | -63.8(5)   | C50B-C49B-C54B-C53B | -53(2)    |
| C58-S8-C59B-C60B    | 156.1(10)  | C50B-C51B-C52B-C53B | 53(3)     |
| C58-S8-C59B-C64B    | -81.8(10)  | C51B-C52B-C53B-C54B | -48(3)    |
| C1A-S1-C7-C8        | 89.3(4)    | C52B-C53B-C54B-C49B | 49(3)     |
| C1A-C2A-C3A-C4A     | -58.8(11)  | C54B-C49B-C50B-C51B | 54(2)     |
| C2A-C1A-C6A-C5A     | -55.0(7)   | C59B-S8-C58-C57     | -79.4(5)  |
| C2A-C3A-C4A-C5A     | 57.8(12)   | C59B-C60B-C61B-C62B | -54.5(18) |
| C3A-C4A-C5A-C6A     | -56.2(10)  | C60B-C59B-C64B-C63B | -53.3(17) |
| C4A-C5A-C6A-C1A     | 54.2(8)    | C60B-C61B-C62B-C63B | 55.1(19)  |
| C6A-C1A-C2A-C3A     | 57.1(8)    | C61B-C62B-C63B-C64B | -54.9(19) |
| C17A-S3-C23-C24     | -90.7(4)   | C62B-C63B-C64B-C59B | 53.2(17)  |
| C17A-C18A-C19A-C20A | 54.8(7)    | C64B-C59B-C60B-C61B | 55.1(17)  |
| C18A-C17A-C22A-C21A | 56.5(7)    |                     |           |
| C18A-C19A-C20A-C21A | -55.5(8)   |                     |           |
| C19A-C20A-C21A-C22A | 56.6(9)    |                     |           |
| C20A-C21A-C22A-C17A | -56.8(8)   |                     |           |

Symmetry transformations used to generate equivalent atoms:  
#1: 1+X, 1+Y, 1+Z; #2: -1+X, +Y, +Z;

## Crystal structure of CP1\_200K

### Crystal Data and Experimental

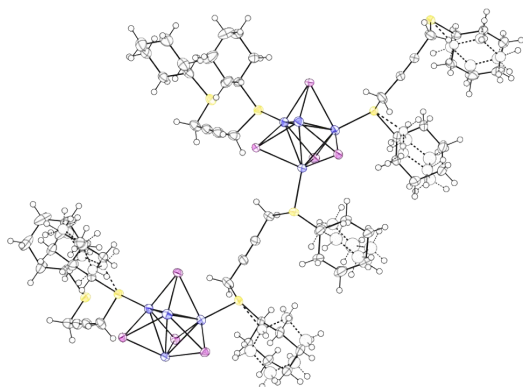

**Experimental:** The data for CP1\_200K were collected from a shock-cooled single crystal at 200.0(1) K on a Bruker D8 Venture four-circle diffractometer with a X-ray tube using a graphite as monochromator and a CPAD PHOTON II area detector detector. The diffractometer was equipped with an Oxford Cryostream 800 low temperature device and used Mo  $K_{\alpha}$  radiation ( $\lambda = 0.71073 \text{ \AA}$ ). All data were integrated with SAINT V8.38A and a multi-scan absorption correction using SADABS 2016/2 was applied.<sup>[1,2]</sup> The structure was solved by direct methods with SHELXT and refined by full-matrix least-squares methods against  $F^2$  using SHELXL.<sup>[3,4]</sup> All non-hydrogen atoms were refined with anisotropic displacement parameters, excepted minor disordered parts. For each compound, some disorders were found in the crystal structure and some geometric parameters of disordered components in each group were restrained by using RIGU or DFIX restraints. For more detail see the .res file included in the cif files. The hydrogen atoms were refined isotropically on calculated positions using a riding model with their  $U_{\text{iso}}$  values constrained to 1.5 times the  $U_{\text{eq}}$  of their pivot atoms for terminal  $sp^3$  carbon atoms and 1.2 times for all other carbon atoms. Crystallographic data for the structures reported in this paper have been deposited with the Cambridge Crystallographic Data Centre.<sup>[5]</sup> CCDC 2356779 contain the supplementary crystallographic data for this paper. These data can be obtained free of charge from The Cambridge Crystallographic Data Centre via [www.ccdc.cam.ac.uk/structures](http://www.ccdc.cam.ac.uk/structures). This report and the CIF file were generated using FinalCif.<sup>[6]</sup>

**Table S13.** Crystal data and structure refinement for CP1\_200K

|                                                 |                                                                      |
|-------------------------------------------------|----------------------------------------------------------------------|
| Internal Reference                              | CP1_200K                                                             |
| CCDC number                                     | 2356779                                                              |
| Empirical formula                               | $C_{64}H_{104}Cu_8I_8S_8$                                            |
| Formula weight                                  | 2653.47                                                              |
| Temperature [K]                                 | 200.0(1)                                                             |
| Crystal system                                  | triclinic                                                            |
| Space group (number)                            | $P1 (2)$                                                             |
| $a$ [ $\text{\AA}$ ]                            | 11.8439(4)                                                           |
| $b$ [ $\text{\AA}$ ]                            | 18.8172(5)                                                           |
| $c$ [ $\text{\AA}$ ]                            | 20.8187(6)                                                           |
| $\alpha$ [ $^\circ$ ]                           | 97.3254(10)                                                          |
| $\beta$ [ $^\circ$ ]                            | 104.5536(10)                                                         |
| $\gamma$ [ $^\circ$ ]                           | 103.6389(10)                                                         |
| Volume [ $\text{\AA}^3$ ]                       | 4277.4(2)                                                            |
| $Z$                                             | 2                                                                    |
| $\rho_{\text{calc}}$ [ $\text{gcm}^{-3}$ ]      | 2.060                                                                |
| $\mu$ [ $\text{mm}^{-1}$ ]                      | 5.066                                                                |
| $F(000)$                                        | 2544                                                                 |
| Crystal size [ $\text{mm}^3$ ]                  | 0.084×0.133×0.172                                                    |
| Crystal colour                                  | clear light colourless                                               |
| Crystal shape                                   | block                                                                |
| Radiation                                       | Mo $K_{\alpha}$ ( $\lambda=0.71073 \text{ \AA}$ )                    |
| $2\theta$ range [ $^\circ$ ]                    | 4.30 to 55.00 (0.77 $\text{\AA}$ )                                   |
| Index ranges                                    | $-15 \leq h \leq 15$<br>$-24 \leq k \leq 24$<br>$-27 \leq l \leq 27$ |
| Reflections collected                           | 386877                                                               |
| Independent reflections                         | 19652<br>$R_{\text{int}} = 0.0300$<br>$R_{\text{sigma}} = 0.0110$    |
| Completeness to $\theta = 25.242^\circ$         | 99.9 %                                                               |
| Data / Restraints / Parameters                  | 19652 / 737 / 914                                                    |
| Goodness-of-fit on $F^2$                        | 1.080                                                                |
| Final $R$ indexes [ $\geq 2\sigma(I)$ ]         | $R_1 = 0.0309$<br>$wR_2 = 0.0670$                                    |
| Final $R$ indexes [all data]                    | $R_1 = 0.0376$<br>$wR_2 = 0.0725$                                    |
| Largest peak/hole [ $\text{e}\text{\AA}^{-3}$ ] | 1.43/−1.23                                                           |

**Table S14. Bond lengths and angles for CP1\_200K**

| <b>Atom–Atom</b>     | <b>Length [Å]</b> |          |           |
|----------------------|-------------------|----------|-----------|
| I1–Cu1               | 2.7261(6)         | S5–C33   | 1.820(4)  |
| I1–Cu2               | 2.6912(6)         | S5–C39   | 1.820(5)  |
| I1–Cu3               | 2.6659(6)         | S6–C42   | 1.826(5)  |
| I2–Cu1               | 2.7302(6)         | S6–C43   | 1.809(5)  |
| I2–Cu2               | 2.6535(6)         | S7–C49A  | 1.871(8)  |
| I2–Cu4               | 2.6819(6)         | S7–C49B  | 1.859(11) |
| I3–Cu1               | 2.5999(6)         | S7–C55   | 1.811(6)  |
| I3–Cu3               | 2.6279(6)         | S8–C58   | 1.808(6)  |
| I3–Cu4               | 2.8000(6)         | S8–C59A  | 1.853(6)  |
| I4–Cu2               | 2.6725(6)         | S8–C59B  | 1.836(14) |
| I4–Cu3               | 2.7699(6)         | C1A–H1A  | 1.0000    |
| I4–Cu4               | 2.6282(6)         | C1A–C2A  | 1.516(9)  |
| I5–Cu5               | 2.6812(6)         | C1A–C6A  | 1.532(9)  |
| I5–Cu6               | 2.6814(6)         | C1B–H1B  | 1.0000    |
| I5–Cu7               | 2.6937(6)         | C1B–C2B  | 1.507(19) |
| I6–Cu5               | 2.7662(6)         | C1B–C6B  | 1.51(2)   |
| I6–Cu6               | 2.6915(7)         | C2A–H2AA | 0.9900    |
| I6–Cu8               | 2.6176(7)         | C2A–H2AB | 0.9900    |
| I7–Cu5               | 2.6259(6)         | C2A–C3A  | 1.574(18) |
| I7–Cu7               | 2.6133(6)         | C2B–H2BA | 0.9900    |
| I7–Cu8               | 2.8266(6)         | C2B–H2BB | 0.9900    |
| I8–Cu6               | 2.6402(6)         | C2B–C3B  | 1.51(4)   |
| I8–Cu7               | 2.6827(6)         | C3A–H3AA | 0.9900    |
| I8–Cu8               | 2.7015(7)         | C3A–H3AB | 0.9900    |
| Cu1–Cu2              | 2.7155(7)         | C3A–C4A  | 1.52(2)   |
| Cu1–Cu3              | 2.6116(7)         | C3B–H3BA | 0.9900    |
| Cu1–Cu4              | 2.7870(7)         | C3B–H3BB | 0.9900    |
| Cu1–S1               | 2.2900(11)        | C3B–C4B  | 1.50(4)   |
| Cu2–Cu3              | 2.8132(7)         | C4A–H4AA | 0.9900    |
| Cu2–Cu4              | 2.6899(7)         | C4A–H4AB | 0.9900    |
| Cu2–S8 <sup>#1</sup> | 2.3070(11)        | C4A–C5A  | 1.305(16) |
| Cu3–Cu4              | 2.7386(8)         | C4B–H4BA | 0.9900    |
| Cu3–S2 <sup>#2</sup> | 2.2832(11)        | C4B–H4BB | 0.9900    |
| Cu4–S3               | 2.3027(12)        | C4B–C5B  | 1.62(3)   |
| Cu5–Cu6              | 2.8288(7)         | C5A–H5AA | 0.9900    |
| Cu5–Cu7              | 2.6591(8)         | C5A–H5AB | 0.9900    |
| Cu5–Cu8              | 2.7224(7)         | C5A–C6A  | 1.547(11) |
| Cu5–S5               | 2.2906(12)        | C5B–H5BA | 0.9900    |
| Cu6–Cu7              | 2.7478(8)         | C5B–H5BB | 0.9900    |
| Cu6–Cu8              | 2.6811(7)         | C5B–C6B  | 1.51(2)   |
| Cu6–S4               | 2.3085(11)        | C6A–H6AA | 0.9900    |
| Cu7–Cu8              | 2.7683(8)         | C6A–H6AB | 0.9900    |
| Cu7–S6 <sup>#2</sup> | 2.2974(13)        | C6B–H6BA | 0.9900    |
| Cu8–S7               | 2.2971(11)        | C6B–H6BB | 0.9900    |
| S1–C1A               | 1.887(6)          | C7–H7A   | 0.9900    |
| S1–C1B               | 1.777(13)         | C7–H7B   | 0.9900    |
| S1–C7                | 1.818(5)          | C7–C8    | 1.449(6)  |
| S2–C10               | 1.819(5)          | C8–C9    | 1.180(6)  |
| S2–C11               | 1.826(4)          | C9–C10   | 1.457(6)  |
| S3–C17A              | 1.853(6)          | C10–H10A | 0.9900    |
| S3–C17B              | 1.916(14)         | C10–H10B | 0.9900    |
| S3–C23               | 1.825(6)          | C11–H11  | 1.0000    |
| S4–C26               | 1.817(5)          | C11–C12  | 1.520(7)  |
| S4–C27               | 1.812(5)          | C11–C16  | 1.517(7)  |
|                      |                   | C12–H12A | 0.9900    |

|           |           |           |           |
|-----------|-----------|-----------|-----------|
| C12-H12B  | 0.9900    | C27-C28B  | 1.53(2)   |
| C12-C13   | 1.524(7)  | C27-C32A  | 1.518(10) |
| C13-H13A  | 0.9900    | C27-C32B  | 1.38(2)   |
| C13-H13B  | 0.9900    | C28A-H28A | 0.9900    |
| C13-C14   | 1.512(10) | C28A-H28B | 0.9900    |
| C14-H14A  | 0.9900    | C28A-C29A | 1.488(11) |
| C14-H14B  | 0.9900    | C28B-H28C | 0.9900    |
| C14-C15   | 1.495(11) | C28B-H28D | 0.9900    |
| C15-H15A  | 0.9900    | C28B-C29B | 1.52(3)   |
| C15-H15B  | 0.9900    | C29A-H29A | 0.9900    |
| C15-C16   | 1.537(8)  | C29A-H29B | 0.9900    |
| C16-H16A  | 0.9900    | C29A-C30A | 1.444(12) |
| C16-H16B  | 0.9900    | C29B-H29C | 0.9900    |
| C17A-H17A | 1.0000    | C29B-H29D | 0.9900    |
| C17A-C18A | 1.528(9)  | C29B-C30B | 1.50(3)   |
| C17A-C22A | 1.517(9)  | C30A-H30A | 0.9900    |
| C17B-H17B | 1.0000    | C30A-H30B | 0.9900    |
| C17B-C18B | 1.465(19) | C30A-C31A | 1.543(11) |
| C17B-C22B | 1.536(19) | C30B-H30C | 0.9900    |
| C18A-H18A | 0.9900    | C30B-H30D | 0.9900    |
| C18A-H18B | 0.9900    | C30B-C31B | 1.46(3)   |
| C18A-C19A | 1.519(9)  | C31A-H31A | 0.9900    |
| C18B-H18C | 0.9900    | C31A-H31B | 0.9900    |
| C18B-H18D | 0.9900    | C31A-C32A | 1.516(12) |
| C18B-C19B | 1.54(2)   | C31B-H31C | 0.9900    |
| C19A-H19A | 0.9900    | C31B-H31D | 0.9900    |
| C19A-H19B | 0.9900    | C31B-C32B | 1.56(3)   |
| C19A-C20A | 1.518(12) | C32A-H32A | 0.9900    |
| C19B-H19C | 0.9900    | C32A-H32B | 0.9900    |
| C19B-H19D | 0.9900    | C32B-H32C | 0.9900    |
| C19B-C20B | 1.52(2)   | C32B-H32D | 0.9900    |
| C20A-H20A | 0.9900    | C33-H33   | 1.0000    |
| C20A-H20B | 0.9900    | C33-C34   | 1.509(6)  |
| C20A-C21A | 1.489(13) | C33-C38   | 1.503(7)  |
| C20B-H20C | 0.9900    | C34-H34A  | 0.9900    |
| C20B-H20D | 0.9900    | C34-H34B  | 0.9900    |
| C20B-C21B | 1.50(3)   | C34-C35   | 1.527(7)  |
| C21A-H21A | 0.9900    | C35-H35A  | 0.9900    |
| C21A-H21B | 0.9900    | C35-H35B  | 0.9900    |
| C21A-C22A | 1.566(12) | C35-C36   | 1.484(8)  |
| C21B-H21C | 0.9900    | C36-H36A  | 0.9900    |
| C21B-H21D | 0.9900    | C36-H36B  | 0.9900    |
| C21B-C22B | 1.52(2)   | C36-C37   | 1.495(10) |
| C22A-H22A | 0.9900    | C37-H37A  | 0.9900    |
| C22A-H22B | 0.9900    | C37-H37B  | 0.9900    |
| C22B-H22C | 0.9900    | C37-C38   | 1.550(7)  |
| C22B-H22D | 0.9900    | C38-H38A  | 0.9900    |
| C23-H23A  | 0.9900    | C38-H38B  | 0.9900    |
| C23-H23B  | 0.9900    | C39-H39A  | 0.9900    |
| C23-C24   | 1.449(6)  | C39-H39B  | 0.9900    |
| C24-C25   | 1.178(6)  | C39-C40   | 1.461(6)  |
| C25-C26   | 1.455(6)  | C40-C41   | 1.190(6)  |
| C26-H26A  | 0.9900    | C41-C42   | 1.453(6)  |
| C26-H26B  | 0.9900    | C42-H42A  | 0.9900    |
| C27-H27   | 1.0000    | C42-H42B  | 0.9900    |
| C27-H27A  | 1.0000    | C43-H43   | 1.0000    |
| C27-C28A  | 1.450(8)  | C43-C44   | 1.516(7)  |

|           |           |
|-----------|-----------|
| C43–C48   | 1.517(7)  |
| C44–H44A  | 0.9900    |
| C44–H44B  | 0.9900    |
| C44–C45   | 1.535(9)  |
| C45–H45A  | 0.9900    |
| C45–H45B  | 0.9900    |
| C45–C46   | 1.512(9)  |
| C46–H46A  | 0.9900    |
| C46–H46B  | 0.9900    |
| C46–C47   | 1.506(9)  |
| C47–H47A  | 0.9900    |
| C47–H47B  | 0.9900    |
| C47–C48   | 1.540(7)  |
| C48–H48A  | 0.9900    |
| C48–H48B  | 0.9900    |
| C49A–H49A | 1.0000    |
| C49A–C50A | 1.469(13) |
| C49A–C54A | 1.517(10) |
| C49B–H49B | 1.0000    |
| C49B–C50B | 1.503(18) |
| C49B–C54B | 1.463(16) |
| C50A–H50A | 0.9900    |
| C50A–H50B | 0.9900    |
| C50A–C51A | 1.549(13) |
| C50B–H50C | 0.9900    |
| C50B–H50D | 0.9900    |
| C50B–C51B | 1.57(2)   |
| C51A–H51A | 0.9900    |
| C51A–H51B | 0.9900    |
| C51A–C52A | 1.526(15) |
| C51B–H51C | 0.9900    |
| C51B–H51D | 0.9900    |
| C51B–C52B | 1.44(2)   |
| C52A–H52A | 0.9900    |
| C52A–H52B | 0.9900    |
| C52A–C53A | 1.472(13) |
| C52B–H52C | 0.9900    |
| C52B–H52D | 0.9900    |
| C52B–C53B | 1.54(2)   |
| C53A–H53A | 0.9900    |
| C53A–H53B | 0.9900    |
| C53A–C54A | 1.530(11) |
| C53B–H53C | 0.9900    |
| C53B–H53D | 0.9900    |
| C53B–C54B | 1.529(17) |
| C54A–H54A | 0.9900    |
| C54A–H54B | 0.9900    |
| C54B–H54C | 0.9900    |
| C54B–H54D | 0.9900    |
| C55–H55A  | 0.9900    |
| C55–H55B  | 0.9900    |
| C55–C56   | 1.471(6)  |
| C56–C57   | 1.178(6)  |
| C57–C58   | 1.452(6)  |
| C58–H58A  | 0.9900    |
| C58–H58B  | 0.9900    |
| C59A–H59A | 1.0000    |

|           |           |
|-----------|-----------|
| C59A–C60A | 1.520(9)  |
| C59A–C64A | 1.533(10) |
| C59B–H59B | 1.0000    |
| C59B–C60B | 1.51(2)   |
| C59B–C64B | 1.45(2)   |
| C60A–H60A | 0.9900    |
| C60A–H60B | 0.9900    |
| C60A–C61A | 1.528(11) |
| C60B–H60C | 0.9900    |
| C60B–H60D | 0.9900    |
| C60B–C61B | 1.52(2)   |
| C61A–H61A | 0.9900    |
| C61A–H61B | 0.9900    |
| C61A–C62A | 1.473(13) |
| C61B–H61C | 0.9900    |
| C61B–H61D | 0.9900    |
| C61B–C62B | 1.49(2)   |
| C62A–H62A | 0.9900    |
| C62A–H62B | 0.9900    |
| C62A–C63A | 1.509(12) |
| C62B–H62C | 0.9900    |
| C62B–H62D | 0.9900    |
| C62B–C63B | 1.50(2)   |
| C63A–H63A | 0.9900    |
| C63A–H63B | 0.9900    |
| C63A–C64A | 1.536(10) |
| C63B–H63C | 0.9900    |
| C63B–H63D | 0.9900    |
| C63B–C64B | 1.53(2)   |
| C64A–H64A | 0.9900    |
| C64A–H64B | 0.9900    |
| C64B–H64C | 0.9900    |
| C64B–H64D | 0.9900    |

| <b>Atom–Atom–Atom</b> | <b>Angle [°]</b> |
|-----------------------|------------------|
| Cu2–I1–Cu1            | 60.164(16)       |
| Cu3–I1–Cu1            | 57.927(17)       |
| Cu3–I1–Cu2            | 63.354(17)       |
| Cu2–I2–Cu1            | 60.563(17)       |
| Cu2–I2–Cu4            | 60.548(17)       |
| Cu4–I2–Cu1            | 61.981(17)       |
| Cu1–I3–Cu3            | 59.939(17)       |
| Cu1–I3–Cu4            | 62.013(17)       |
| Cu3–I3–Cu4            | 60.501(17)       |
| Cu2–I4–Cu3            | 62.219(16)       |
| Cu4–I4–Cu2            | 60.981(17)       |
| Cu4–I4–Cu3            | 60.903(17)       |
| Cu5–I5–Cu6            | 63.675(17)       |
| Cu5–I5–Cu7            | 59.303(17)       |
| Cu6–I5–Cu7            | 61.488(17)       |
| Cu6–I6–Cu5            | 62.420(17)       |
| Cu8–I6–Cu5            | 60.675(17)       |
| Cu8–I6–Cu6            | 60.643(18)       |
| Cu5–I7–Cu8            | 59.771(17)       |
| Cu7–I7–Cu5            | 61.000(18)       |
| Cu7–I7–Cu8            | 61.031(18)       |
| Cu6–I8–Cu7            | 62.152(17)       |



|                           |            |                           |             |
|---------------------------|------------|---------------------------|-------------|
| Cu6-I8-Cu8                | 60.241(18) | Cu4-Cu3-I4                | 56.992(17)  |
| Cu7-I8-Cu8                | 61.882(18) | Cu4-Cu3-Cu2               | 57.941(18)  |
| I1-Cu1-I2                 | 111.78(2)  | S2 <sup>#2</sup> -Cu3-I1  | 112.08(4)   |
| I1-Cu1-Cu4                | 106.90(2)  | S2 <sup>#2</sup> -Cu3-I3  | 108.45(4)   |
| I2-Cu1-Cu4                | 58.158(17) | S2 <sup>#2</sup> -Cu3-I4  | 97.65(3)    |
| I3-Cu1-I1                 | 114.69(2)  | S2 <sup>#2</sup> -Cu3-Cu1 | 153.98(4)   |
| I3-Cu1-I2                 | 111.94(2)  | S2 <sup>#2</sup> -Cu3-Cu2 | 141.68(4)   |
| I3-Cu1-Cu2                | 112.35(2)  | S2 <sup>#2</sup> -Cu3-Cu4 | 135.73(4)   |
| I3-Cu1-Cu3                | 60.563(18) | I2-Cu4-I3                 | 107.37(2)   |
| I3-Cu1-Cu4                | 62.523(17) | I2-Cu4-Cu1                | 59.861(17)  |
| Cu2-Cu1-I1                | 59.281(16) | I2-Cu4-Cu2                | 59.203(17)  |
| Cu2-Cu1-I2                | 58.320(17) | I2-Cu4-Cu3                | 108.28(2)   |
| Cu2-Cu1-Cu4               | 58.511(18) | I4-Cu4-I2                 | 113.82(2)   |
| Cu3-Cu1-I1                | 59.880(18) | I4-Cu4-I3                 | 113.61(2)   |
| Cu3-Cu1-I2                | 110.63(2)  | I4-Cu4-Cu1                | 107.34(2)   |
| Cu3-Cu1-Cu2               | 63.72(2)   | I4-Cu4-Cu2                | 60.323(18)  |
| Cu3-Cu1-Cu4               | 60.86(2)   | I4-Cu4-Cu3                | 62.105(18)  |
| S1-Cu1-I1                 | 106.53(3)  | Cu1-Cu4-I3                | 55.464(16)  |
| S1-Cu1-I2                 | 96.29(3)   | Cu2-Cu4-I3                | 107.09(2)   |
| S1-Cu1-I3                 | 114.08(3)  | Cu2-Cu4-Cu1               | 59.416(19)  |
| S1-Cu1-Cu2                | 132.84(4)  | Cu2-Cu4-Cu3               | 62.42(2)    |
| S1-Cu1-Cu3                | 152.70(4)  | Cu3-Cu4-I3                | 56.637(17)  |
| S1-Cu1-Cu4                | 143.75(4)  | Cu3-Cu4-Cu1               | 56.404(19)  |
| I1-Cu2-Cu1                | 60.555(17) | S3-Cu4-I2                 | 109.54(4)   |
| I1-Cu2-Cu3                | 57.884(16) | S3-Cu4-I3                 | 93.61(3)    |
| I2-Cu2-I1                 | 115.40(2)  | S3-Cu4-I4                 | 116.88(4)   |
| I2-Cu2-I4                 | 113.30(2)  | S3-Cu4-Cu1                | 133.90(4)   |
| I2-Cu2-Cu1                | 61.116(18) | S3-Cu4-Cu2                | 158.48(4)   |
| I2-Cu2-Cu3                | 106.91(2)  | S3-Cu4-Cu3                | 137.48(4)   |
| I2-Cu2-Cu4                | 60.249(18) | I5-Cu5-I6                 | 107.842(19) |
| I4-Cu2-I1                 | 108.96(2)  | I5-Cu5-Cu6                | 58.167(16)  |
| I4-Cu2-Cu1                | 108.17(2)  | I5-Cu5-Cu8                | 108.22(2)   |
| I4-Cu2-Cu3                | 60.589(17) | I6-Cu5-Cu6                | 57.495(17)  |
| I4-Cu2-Cu4                | 58.696(17) | I7-Cu5-I5                 | 113.55(2)   |
| Cu1-Cu2-Cu3               | 56.343(19) | I7-Cu5-I6                 | 115.15(2)   |
| Cu4-Cu2-I1                | 110.79(2)  | I7-Cu5-Cu6                | 109.14(2)   |
| Cu4-Cu2-Cu1               | 62.072(19) | I7-Cu5-Cu7                | 59.266(18)  |
| Cu4-Cu2-Cu3               | 59.64(2)   | I7-Cu5-Cu8                | 63.780(17)  |
| S8 <sup>#1</sup> -Cu2-I1  | 100.62(3)  | Cu7-Cu5-I5                | 60.583(17)  |
| S8 <sup>#1</sup> -Cu2-I2  | 103.08(4)  | Cu7-Cu5-I6                | 108.15(2)   |
| S8 <sup>#1</sup> -Cu2-I4  | 114.89(4)  | Cu7-Cu5-Cu6               | 60.00(2)    |
| S8 <sup>#1</sup> -Cu2-Cu1 | 136.79(4)  | Cu7-Cu5-Cu8               | 61.90(2)    |
| S8 <sup>#1</sup> -Cu2-Cu3 | 148.59(4)  | Cu8-Cu5-I6                | 56.962(18)  |
| S8 <sup>#1</sup> -Cu2-Cu4 | 148.36(4)  | Cu8-Cu5-Cu6               | 57.722(19)  |
| I1-Cu3-I4                 | 106.84(2)  | S5-Cu5-I5                 | 109.75(3)   |
| I1-Cu3-Cu2                | 58.763(16) | S5-Cu5-I6                 | 97.89(3)    |
| I1-Cu3-Cu4                | 110.07(2)  | S5-Cu5-I7                 | 111.51(3)   |
| I3-Cu3-I1                 | 115.81(2)  | S5-Cu5-Cu6                | 138.72(4)   |
| I3-Cu3-I4                 | 114.61(2)  | S5-Cu5-Cu7                | 153.87(4)   |
| I3-Cu3-Cu2                | 108.46(2)  | S5-Cu5-Cu8                | 139.56(4)   |
| I3-Cu3-Cu4                | 62.862(18) | I5-Cu6-I6                 | 110.06(2)   |
| I4-Cu3-Cu2                | 57.192(16) | I5-Cu6-Cu5                | 58.159(16)  |
| Cu1-Cu3-I1                | 62.192(18) | I5-Cu6-Cu7                | 59.476(17)  |
| Cu1-Cu3-I3                | 59.498(17) | I6-Cu6-Cu5                | 60.084(18)  |
| Cu1-Cu3-I4                | 108.33(2)  | I6-Cu6-Cu7                | 107.75(2)   |
| Cu1-Cu3-Cu2               | 59.939(19) | I8-Cu6-I5                 | 112.36(2)   |
| Cu1-Cu3-Cu4               | 62.73(2)   | I8-Cu6-I6                 | 113.93(2)   |

|                           |            |                           |            |
|---------------------------|------------|---------------------------|------------|
| I8-Cu6-Cu5                | 106.85(2)  | C1B-S1-Cu1                | 112.3(4)   |
| I8-Cu6-Cu7                | 59.682(18) | C1B-S1-C7                 | 121.2(5)   |
| I8-Cu6-Cu8                | 61.013(19) | C7-S1-Cu1                 | 99.64(16)  |
| Cu7-Cu6-Cu5               | 56.935(19) | C7-S1-C1A                 | 95.0(3)    |
| Cu8-Cu6-I5                | 109.44(2)  | C10-S2-Cu3 <sup>#3</sup>  | 104.95(15) |
| Cu8-Cu6-I6                | 58.315(19) | C10-S2-C11                | 100.5(2)   |
| Cu8-Cu6-Cu5               | 59.146(19) | C11-S2-Cu3 <sup>#3</sup>  | 115.25(15) |
| Cu8-Cu6-Cu7               | 61.30(2)   | C17A-S3-Cu4               | 116.8(2)   |
| S4-Cu6-I5                 | 101.97(3)  | C17B-S3-Cu4               | 102.6(4)   |
| S4-Cu6-I6                 | 107.25(4)  | C23-S3-Cu4                | 102.74(16) |
| S4-Cu6-I8                 | 110.49(4)  | C23-S3-C17A               | 93.3(3)    |
| S4-Cu6-Cu5                | 142.34(4)  | C23-S3-C17B               | 122.1(5)   |
| S4-Cu6-Cu7                | 144.39(4)  | C26-S4-Cu6                | 101.43(16) |
| S4-Cu6-Cu8                | 148.34(4)  | C27-S4-Cu6                | 110.05(19) |
| I5-Cu7-Cu6                | 59.036(16) | C27-S4-C26                | 101.0(3)   |
| I5-Cu7-Cu8                | 106.53(2)  | C33-S5-Cu5                | 114.30(15) |
| I7-Cu7-I5                 | 113.55(2)  | C39-S5-Cu5                | 103.76(16) |
| I7-Cu7-I8                 | 114.55(2)  | C39-S5-C33                | 100.3(2)   |
| I7-Cu7-Cu5                | 59.733(17) | C42-S6-Cu7 <sup>#3</sup>  | 104.51(17) |
| I7-Cu7-Cu6                | 112.04(2)  | C43-S6-Cu7 <sup>#3</sup>  | 110.64(16) |
| I7-Cu7-Cu8                | 63.291(18) | C43-S6-C42                | 105.0(2)   |
| I8-Cu7-I5                 | 110.64(2)  | C49A-S7-Cu8               | 107.7(3)   |
| I8-Cu7-Cu6                | 58.166(17) | C49B-S7-Cu8               | 117.5(4)   |
| I8-Cu7-Cu8                | 59.394(19) | C55-S7-Cu8                | 99.84(17)  |
| Cu5-Cu7-I5                | 60.114(17) | C55-S7-C49A               | 111.8(4)   |
| Cu5-Cu7-I8                | 110.67(2)  | C55-S7-C49B               | 87.4(4)    |
| Cu5-Cu7-Cu6               | 63.07(2)   | C58-S8-Cu2 <sup>#4</sup>  | 104.61(16) |
| Cu5-Cu7-Cu8               | 60.17(2)   | C58-S8-C59A               | 109.2(3)   |
| Cu6-Cu7-Cu8               | 58.161(19) | C58-S8-C59B               | 87.7(5)    |
| S6 <sup>#2</sup> -Cu7-I5  | 111.99(4)  | C59A-S8-Cu2 <sup>#4</sup> | 106.0(2)   |
| S6 <sup>#2</sup> -Cu7-I7  | 107.84(4)  | S1-C1A-H1A                | 108.9      |
| S6 <sup>#2</sup> -Cu7-I8  | 97.11(4)   | C2A-C1A-S1                | 108.7(4)   |
| S6 <sup>#2</sup> -Cu7-Cu5 | 152.19(4)  | C2A-C1A-H1A               | 108.9      |
| S6 <sup>#2</sup> -Cu7-Cu6 | 139.10(4)  | C2A-C1A-C6A               | 111.9(5)   |
| S6 <sup>#2</sup> -Cu7-Cu8 | 140.26(4)  | C6A-C1A-S1                | 109.4(5)   |
| I6-Cu8-I7                 | 113.41(2)  | C6A-C1A-H1A               | 108.9      |
| I6-Cu8-I8                 | 114.34(2)  | S1-C1B-H1B                | 107.6      |
| I6-Cu8-Cu5                | 62.363(19) | C2B-C1B-S1                | 109.5(10)  |
| I6-Cu8-Cu6                | 61.042(19) | C2B-C1B-H1B               | 107.6      |
| I6-Cu8-Cu7                | 109.30(2)  | C6B-C1B-S1                | 112.4(10)  |
| I8-Cu8-I7                 | 107.39(2)  | C6B-C1B-H1B               | 107.6      |
| I8-Cu8-Cu5                | 108.20(2)  | C6B-C1B-C2B               | 111.9(12)  |
| I8-Cu8-Cu7                | 58.724(18) | C1A-C2A-H2AA              | 110.4      |
| Cu5-Cu8-I7                | 56.449(16) | C1A-C2A-H2AB              | 110.4      |
| Cu5-Cu8-Cu7               | 57.92(2)   | C1A-C2A-C3A               | 106.8(10)  |
| Cu6-Cu8-I7                | 107.63(2)  | H2AA-C2A-H2AB             | 108.6      |
| Cu6-Cu8-I8                | 58.747(19) | C3A-C2A-H2AA              | 110.4      |
| Cu6-Cu8-Cu5               | 63.132(19) | C3A-C2A-H2AB              | 110.4      |
| Cu6-Cu8-Cu7               | 60.54(2)   | C1B-C2B-H2BA              | 109.6      |
| Cu7-Cu8-I7                | 55.678(17) | C1B-C2B-H2BB              | 109.6      |
| S7-Cu8-I6                 | 116.02(4)  | C1B-C2B-C3B               | 110(3)     |
| S7-Cu8-I7                 | 93.69(3)   | H2BA-C2B-H2BB             | 108.2      |
| S7-Cu8-I8                 | 109.93(4)  | C3B-C2B-H2BA              | 109.6      |
| S7-Cu8-Cu5                | 137.23(4)  | C3B-C2B-H2BB              | 109.6      |
| S7-Cu8-Cu6                | 157.90(4)  | C2A-C3A-H3AA              | 109.6      |
| S7-Cu8-Cu7                | 132.92(4)  | C2A-C3A-H3AB              | 109.6      |
| C1A-S1-Cu1                | 109.98(19) | H3AA-C3A-H3AB             | 108.2      |

|               |           |                |           |
|---------------|-----------|----------------|-----------|
| C4A-C3A-C2A   | 110.1(15) | C9-C10-H10B    | 109.9     |
| C4A-C3A-H3AA  | 109.6     | H10A-C10-H10B  | 108.3     |
| C4A-C3A-H3AB  | 109.6     | S2-C11-H11     | 108.0     |
| C2B-C3B-H3BA  | 107.4     | C12-C11-S2     | 108.3(3)  |
| C2B-C3B-H3BB  | 107.4     | C12-C11-H11    | 108.0     |
| H3BA-C3B-H3BB | 106.9     | C16-C11-S2     | 112.6(3)  |
| C4B-C3B-C2B   | 120(3)    | C16-C11-H11    | 108.0     |
| C4B-C3B-H3BA  | 107.4     | C16-C11-C12    | 111.9(4)  |
| C4B-C3B-H3BB  | 107.4     | C11-C12-H12A   | 109.6     |
| C3A-C4A-H4AA  | 108.2     | C11-C12-H12B   | 109.6     |
| C3A-C4A-H4AB  | 108.2     | C11-C12-C13    | 110.2(5)  |
| H4AA-C4A-H4AB | 107.4     | H12A-C12-H12B  | 108.1     |
| C5A-C4A-C3A   | 116.2(15) | C13-C12-H12A   | 109.6     |
| C5A-C4A-H4AA  | 108.2     | C13-C12-H12B   | 109.6     |
| C5A-C4A-H4AB  | 108.2     | C12-C13-H13A   | 109.4     |
| C3B-C4B-H4BA  | 109.7     | C12-C13-H13B   | 109.4     |
| C3B-C4B-H4BB  | 109.7     | H13A-C13-H13B  | 108.0     |
| C3B-C4B-C5B   | 110(3)    | C14-C13-C12    | 111.4(5)  |
| H4BA-C4B-H4BB | 108.2     | C14-C13-H13A   | 109.4     |
| C5B-C4B-H4BA  | 109.7     | C14-C13-H13B   | 109.4     |
| C5B-C4B-H4BB  | 109.7     | C13-C14-H14A   | 109.2     |
| C4A-C5A-H5AA  | 109.0     | C13-C14-H14B   | 109.2     |
| C4A-C5A-H5AB  | 109.0     | H14A-C14-H14B  | 107.9     |
| C4A-C5A-C6A   | 113.0(9)  | C15-C14-C13    | 112.1(6)  |
| H5AA-C5A-H5AB | 107.8     | C15-C14-H14A   | 109.2     |
| C6A-C5A-H5AA  | 109.0     | C15-C14-H14B   | 109.2     |
| C6A-C5A-H5AB  | 109.0     | C14-C15-H15A   | 109.3     |
| C4B-C5B-H5BA  | 107.0     | C14-C15-H15B   | 109.3     |
| C4B-C5B-H5BB  | 107.0     | C14-C15-C16    | 111.5(6)  |
| H5BA-C5B-H5BB | 106.8     | H15A-C15-H15B  | 108.0     |
| C6B-C5B-C4B   | 121.3(17) | C16-C15-H15A   | 109.3     |
| C6B-C5B-H5BA  | 107.0     | C16-C15-H15B   | 109.3     |
| C6B-C5B-H5BB  | 107.0     | C11-C16-C15    | 109.4(5)  |
| C1A-C6A-C5A   | 109.9(7)  | C11-C16-H16A   | 109.8     |
| C1A-C6A-H6AA  | 109.7     | C11-C16-H16B   | 109.8     |
| C1A-C6A-H6AB  | 109.7     | C15-C16-H16A   | 109.8     |
| C5A-C6A-H6AA  | 109.7     | C15-C16-H16B   | 109.8     |
| C5A-C6A-H6AB  | 109.7     | H16A-C16-H16B  | 108.2     |
| H6AA-C6A-H6AB | 108.2     | S3-C17A-H17A   | 108.4     |
| C1B-C6B-C5B   | 111.8(14) | C18A-C17A-S3   | 114.7(4)  |
| C1B-C6B-H6BA  | 109.3     | C18A-C17A-H17A | 108.4     |
| C1B-C6B-H6BB  | 109.3     | C22A-C17A-S3   | 105.6(5)  |
| C5B-C6B-H6BA  | 109.3     | C22A-C17A-H17A | 108.4     |
| C5B-C6B-H6BB  | 109.3     | C22A-C17A-C18A | 111.2(6)  |
| H6BA-C6B-H6BB | 107.9     | S3-C17B-H17B   | 108.3     |
| S1-C7-H7A     | 108.9     | C18B-C17B-S3   | 111.0(11) |
| S1-C7-H7B     | 108.9     | C18B-C17B-H17B | 108.3     |
| H7A-C7-H7B    | 107.7     | C18B-C17B-C22B | 115.5(13) |
| C8-C7-S1      | 113.3(3)  | C22B-C17B-S3   | 105.2(9)  |
| C8-C7-H7A     | 108.9     | C22B-C17B-H17B | 108.3     |
| C8-C7-H7B     | 108.9     | C17A-C18A-H18A | 109.4     |
| C9-C8-C7      | 174.3(5)  | C17A-C18A-H18B | 109.4     |
| C8-C9-C10     | 172.9(5)  | H18A-C18A-H18B | 108.0     |
| S2-C10-H10A   | 109.9     | C19A-C18A-C17A | 111.2(6)  |
| S2-C10-H10B   | 109.9     | C19A-C18A-H18A | 109.4     |
| C9-C10-S2     | 108.9(3)  | C19A-C18A-H18B | 109.4     |
| C9-C10-H10A   | 109.9     | C17B-C18B-H18C | 109.4     |

|                |           |                |           |
|----------------|-----------|----------------|-----------|
| C17B-C18B-H18D | 109.4     | C24-C23-H23A   | 109.1     |
| C17B-C18B-C19B | 111.0(14) | C24-C23-H23B   | 109.1     |
| H18C-C18B-H18D | 108.0     | C25-C24-C23    | 176.2(5)  |
| C19B-C18B-H18C | 109.4     | C24-C25-C26    | 177.0(5)  |
| C19B-C18B-H18D | 109.4     | S4-C26-H26A    | 108.9     |
| C18A-C19A-H19A | 109.4     | S4-C26-H26B    | 108.9     |
| C18A-C19A-H19B | 109.4     | C25-C26-S4     | 113.5(4)  |
| H19A-C19A-H19B | 108.0     | C25-C26-H26A   | 108.9     |
| C20A-C19A-C18A | 111.2(7)  | C25-C26-H26B   | 108.9     |
| C20A-C19A-H19A | 109.4     | H26A-C26-H26B  | 107.7     |
| C20A-C19A-H19B | 109.4     | S4-C27-H27     | 105.6     |
| C18B-C19B-H19C | 109.6     | S4-C27-H27A    | 101.2     |
| C18B-C19B-H19D | 109.6     | C28A-C27-S4    | 115.9(5)  |
| H19C-C19B-H19D | 108.1     | C28A-C27-H27   | 105.6     |
| C20B-C19B-C18B | 110.1(16) | C28A-C27-C32A  | 112.6(5)  |
| C20B-C19B-H19C | 109.6     | C28B-C27-S4    | 103.6(10) |
| C20B-C19B-H19D | 109.6     | C28B-C27-H27A  | 101.2     |
| C19A-C20A-H20A | 109.2     | C32A-C27-S4    | 110.7(5)  |
| C19A-C20A-H20B | 109.2     | C32A-C27-H27   | 105.6     |
| H20A-C20A-H20B | 107.9     | C32B-C27-S4    | 125.4(10) |
| C21A-C20A-C19A | 112.2(7)  | C32B-C27-H27A  | 101.2     |
| C21A-C20A-H20A | 109.2     | C32B-C27-C28B  | 119.7(14) |
| C21A-C20A-H20B | 109.2     | C27-C28A-H28A  | 109.1     |
| C19B-C20B-H20C | 109.4     | C27-C28A-H28B  | 109.1     |
| C19B-C20B-H20D | 109.4     | C27-C28A-C29A  | 112.5(7)  |
| H20C-C20B-H20D | 108.0     | H28A-C28A-H28B | 107.8     |
| C21B-C20B-C19B | 111.1(17) | C29A-C28A-H28A | 109.1     |
| C21B-C20B-H20C | 109.4     | C29A-C28A-H28B | 109.1     |
| C21B-C20B-H20D | 109.4     | C27-C28B-H28C  | 109.3     |
| C20A-C21A-H21A | 109.7     | C27-C28B-H28D  | 109.3     |
| C20A-C21A-H21B | 109.7     | H28C-C28B-H28D | 107.9     |
| C20A-C21A-C22A | 109.9(7)  | C29B-C28B-C27  | 111.8(19) |
| H21A-C21A-H21B | 108.2     | C29B-C28B-H28C | 109.3     |
| C22A-C21A-H21A | 109.7     | C29B-C28B-H28D | 109.3     |
| C22A-C21A-H21B | 109.7     | C28A-C29A-H29A | 108.7     |
| C20B-C21B-H21C | 108.8     | C28A-C29A-H29B | 108.7     |
| C20B-C21B-H21D | 108.8     | H29A-C29A-H29B | 107.6     |
| C20B-C21B-C22B | 114.0(17) | C30A-C29A-C28A | 114.1(8)  |
| H21C-C21B-H21D | 107.7     | C30A-C29A-H29A | 108.7     |
| C22B-C21B-H21C | 108.8     | C30A-C29A-H29B | 108.7     |
| C22B-C21B-H21D | 108.8     | C28B-C29B-H29C | 109.4     |
| C17A-C22A-C21A | 110.4(7)  | C28B-C29B-H29D | 109.4     |
| C17A-C22A-H22A | 109.6     | H29C-C29B-H29D | 108.0     |
| C17A-C22A-H22B | 109.6     | C30B-C29B-C28B | 111(2)    |
| C21A-C22A-H22A | 109.6     | C30B-C29B-H29C | 109.4     |
| C21A-C22A-H22B | 109.6     | C30B-C29B-H29D | 109.4     |
| H22A-C22A-H22B | 108.1     | C29A-C30A-H30A | 109.3     |
| C17B-C22B-H22C | 110.0     | C29A-C30A-H30B | 109.3     |
| C17B-C22B-H22D | 110.0     | C29A-C30A-C31A | 111.8(8)  |
| C21B-C22B-C17B | 108.5(14) | H30A-C30A-H30B | 107.9     |
| C21B-C22B-H22C | 110.0     | C31A-C30A-H30A | 109.3     |
| C21B-C22B-H22D | 110.0     | C31A-C30A-H30B | 109.3     |
| H22C-C22B-H22D | 108.4     | C29B-C30B-H30C | 108.9     |
| S3-C23-H23A    | 109.1     | C29B-C30B-H30D | 108.9     |
| S3-C23-H23B    | 109.1     | H30C-C30B-H30D | 107.7     |
| H23A-C23-H23B  | 107.9     | C31B-C30B-C29B | 114(3)    |
| C24-C23-S3     | 112.4(4)  | C31B-C30B-H30C | 108.9     |

|                |           |                |          |
|----------------|-----------|----------------|----------|
| C31B-C30B-H30D | 108.9     | C33-C38-H38B   | 109.7    |
| C30A-C31A-H31A | 109.9     | C37-C38-H38A   | 109.7    |
| C30A-C31A-H31B | 109.9     | C37-C38-H38B   | 109.7    |
| H31A-C31A-H31B | 108.3     | H38A-C38-H38B  | 108.2    |
| C32A-C31A-C30A | 109.0(8)  | S5-C39-H39A    | 109.6    |
| C32A-C31A-H31A | 109.9     | S5-C39-H39B    | 109.6    |
| C32A-C31A-H31B | 109.9     | H39A-C39-H39B  | 108.1    |
| C30B-C31B-H31C | 110.2     | C40-C39-S5     | 110.3(4) |
| C30B-C31B-H31D | 110.2     | C40-C39-H39A   | 109.6    |
| C30B-C31B-C32B | 107(3)    | C40-C39-H39B   | 109.6    |
| H31C-C31B-H31D | 108.5     | C41-C40-C39    | 174.7(6) |
| C32B-C31B-H31C | 110.2     | C40-C41-C42    | 175.2(6) |
| C32B-C31B-H31D | 110.2     | S6-C42-H42A    | 109.3    |
| C27-C32A-H32A  | 109.3     | S6-C42-H42B    | 109.3    |
| C27-C32A-H32B  | 109.3     | C41-C42-S6     | 111.4(3) |
| C31A-C32A-C27  | 111.5(8)  | C41-C42-H42A   | 109.3    |
| C31A-C32A-H32A | 109.3     | C41-C42-H42B   | 109.3    |
| C31A-C32A-H32B | 109.3     | H42A-C42-H42B  | 108.0    |
| H32A-C32A-H32B | 108.0     | S6-C43-H43     | 106.3    |
| C27-C32B-C31B  | 111.6(19) | C44-C43-S6     | 111.9(4) |
| C27-C32B-H32C  | 109.3     | C44-C43-H43    | 106.3    |
| C27-C32B-H32D  | 109.3     | C44-C43-C48    | 111.6(4) |
| C31B-C32B-H32C | 109.3     | C48-C43-S6     | 113.9(3) |
| C31B-C32B-H32D | 109.3     | C48-C43-H43    | 106.3    |
| H32C-C32B-H32D | 108.0     | C43-C44-H44A   | 109.6    |
| S5-C33-H33     | 107.7     | C43-C44-H44B   | 109.6    |
| C34-C33-S5     | 108.7(3)  | C43-C44-C45    | 110.2(5) |
| C34-C33-H33    | 107.7     | H44A-C44-H44B  | 108.1    |
| C38-C33-S5     | 113.1(3)  | C45-C44-H44A   | 109.6    |
| C38-C33-H33    | 107.7     | C45-C44-H44B   | 109.6    |
| C38-C33-C34    | 111.6(4)  | C44-C45-H45A   | 109.3    |
| C33-C34-H34A   | 109.6     | C44-C45-H45B   | 109.3    |
| C33-C34-H34B   | 109.6     | H45A-C45-H45B  | 108.0    |
| C33-C34-C35    | 110.3(4)  | C46-C45-C44    | 111.5(5) |
| H34A-C34-H34B  | 108.1     | C46-C45-H45A   | 109.3    |
| C35-C34-H34A   | 109.6     | C46-C45-H45B   | 109.3    |
| C35-C34-H34B   | 109.6     | C45-C46-H46A   | 109.3    |
| C34-C35-H35A   | 109.3     | C45-C46-H46B   | 109.3    |
| C34-C35-H35B   | 109.3     | H46A-C46-H46B  | 107.9    |
| H35A-C35-H35B  | 108.0     | C47-C46-C45    | 111.7(5) |
| C36-C35-C34    | 111.4(4)  | C47-C46-H46A   | 109.3    |
| C36-C35-H35A   | 109.3     | C47-C46-H46B   | 109.3    |
| C36-C35-H35B   | 109.3     | C46-C47-H47A   | 109.5    |
| C35-C36-H36A   | 109.3     | C46-C47-H47B   | 109.5    |
| C35-C36-H36B   | 109.3     | C46-C47-C48    | 110.7(5) |
| C35-C36-C37    | 111.4(6)  | H47A-C47-H47B  | 108.1    |
| H36A-C36-H36B  | 108.0     | C48-C47-H47A   | 109.5    |
| C37-C36-H36A   | 109.3     | C48-C47-H47B   | 109.5    |
| C37-C36-H36B   | 109.3     | C43-C48-C47    | 111.2(4) |
| C36-C37-H37A   | 109.4     | C43-C48-H48A   | 109.4    |
| C36-C37-H37B   | 109.4     | C43-C48-H48B   | 109.4    |
| C36-C37-C38    | 111.0(6)  | C47-C48-H48A   | 109.4    |
| H37A-C37-H37B  | 108.0     | C47-C48-H48B   | 109.4    |
| C38-C37-H37A   | 109.4     | H48A-C48-H48B  | 108.0    |
| C38-C37-H37B   | 109.4     | S7-C49A-H49A   | 105.7    |
| C33-C38-C37    | 109.8(4)  | C50A-C49A-S7   | 114.8(7) |
| C33-C38-H38A   | 109.7     | C50A-C49A-H49A | 105.7    |

|                |           |                |           |
|----------------|-----------|----------------|-----------|
| C50A-C49A-C54A | 113.8(7)  | C49A-C54A-C53A | 110.4(7)  |
| C54A-C49A-S7   | 110.1(6)  | C49A-C54A-H54A | 109.6     |
| C54A-C49A-H49A | 105.7     | C49A-C54A-H54B | 109.6     |
| S7-C49B-H49B   | 108.5     | C53A-C54A-H54A | 109.6     |
| C50B-C49B-S7   | 100.1(9)  | C53A-C54A-H54B | 109.6     |
| C50B-C49B-H49B | 108.5     | H54A-C54A-H54B | 108.1     |
| C54B-C49B-S7   | 118.4(8)  | C49B-C54B-C53B | 111.6(11) |
| C54B-C49B-H49B | 108.5     | C49B-C54B-H54C | 109.3     |
| C54B-C49B-C50B | 112.3(11) | C49B-C54B-H54D | 109.3     |
| C49A-C50A-H50A | 109.6     | C53B-C54B-H54C | 109.3     |
| C49A-C50A-H50B | 109.6     | C53B-C54B-H54D | 109.3     |
| C49A-C50A-C51A | 110.5(10) | H54C-C54B-H54D | 108.0     |
| H50A-C50A-H50B | 108.1     | S7-C55-H55A    | 108.7     |
| C51A-C50A-H50A | 109.6     | S7-C55-H55B    | 108.7     |
| C51A-C50A-H50B | 109.6     | H55A-C55-H55B  | 107.6     |
| C49B-C50B-H50C | 109.1     | C56-C55-S7     | 114.2(4)  |
| C49B-C50B-H50D | 109.1     | C56-C55-H55A   | 108.7     |
| C49B-C50B-C51B | 112.4(13) | C56-C55-H55B   | 108.7     |
| H50C-C50B-H50D | 107.9     | C57-C56-C55    | 177.3(5)  |
| C51B-C50B-H50C | 109.1     | C56-C57-C58    | 176.9(5)  |
| C51B-C50B-H50D | 109.1     | S8-C58-H58A    | 109.0     |
| C50A-C51A-H51A | 109.7     | S8-C58-H58B    | 109.0     |
| C50A-C51A-H51B | 109.7     | C57-C58-S8     | 113.1(4)  |
| H51A-C51A-H51B | 108.2     | C57-C58-H58A   | 109.0     |
| C52A-C51A-C50A | 109.7(8)  | C57-C58-H58B   | 109.0     |
| C52A-C51A-H51A | 109.7     | H58A-C58-H58B  | 107.8     |
| C52A-C51A-H51B | 109.7     | S8-C59A-H59A   | 107.0     |
| C50B-C51B-H51C | 109.2     | C60A-C59A-S8   | 111.3(5)  |
| C50B-C51B-H51D | 109.2     | C60A-C59A-H59A | 107.0     |
| H51C-C51B-H51D | 107.9     | C60A-C59A-C64A | 111.5(6)  |
| C52B-C51B-C50B | 112.2(16) | C64A-C59A-S8   | 112.6(5)  |
| C52B-C51B-H51C | 109.2     | C64A-C59A-H59A | 107.0     |
| C52B-C51B-H51D | 109.2     | S8-C59B-H59B   | 108.5     |
| C51A-C52A-H52A | 109.8     | C60B-C59B-S8   | 105.4(11) |
| C51A-C52A-H52B | 109.8     | C60B-C59B-H59B | 108.5     |
| H52A-C52A-H52B | 108.2     | C64B-C59B-S8   | 112.9(12) |
| C53A-C52A-C51A | 109.4(9)  | C64B-C59B-H59B | 108.5     |
| C53A-C52A-H52A | 109.8     | C64B-C59B-C60B | 113.0(14) |
| C53A-C52A-H52B | 109.8     | C59A-C60A-H60A | 109.7     |
| C51B-C52B-H52C | 109.0     | C59A-C60A-H60B | 109.7     |
| C51B-C52B-H52D | 109.0     | C59A-C60A-C61A | 110.0(6)  |
| C51B-C52B-C53B | 112.8(14) | H60A-C60A-H60B | 108.2     |
| H52C-C52B-H52D | 107.8     | C61A-C60A-H60A | 109.7     |
| C53B-C52B-H52C | 109.0     | C61A-C60A-H60B | 109.7     |
| C53B-C52B-H52D | 109.0     | C59B-C60B-H60C | 109.2     |
| C52A-C53A-H53A | 109.0     | C59B-C60B-H60D | 109.2     |
| C52A-C53A-H53B | 109.0     | C59B-C60B-C61B | 112.1(14) |
| C52A-C53A-C54A | 112.9(8)  | H60C-C60B-H60D | 107.9     |
| H53A-C53A-H53B | 107.8     | C61B-C60B-H60C | 109.2     |
| C54A-C53A-H53A | 109.0     | C61B-C60B-H60D | 109.2     |
| C54A-C53A-H53B | 109.0     | C60A-C61A-H61A | 109.0     |
| C52B-C53B-H53C | 109.4     | C60A-C61A-H61B | 109.0     |
| C52B-C53B-H53D | 109.4     | H61A-C61A-H61B | 107.8     |
| H53C-C53B-H53D | 108.0     | C62A-C61A-C60A | 112.7(7)  |
| C54B-C53B-C52B | 111.1(12) | C62A-C61A-H61A | 109.0     |
| C54B-C53B-H53C | 109.4     | C62A-C61A-H61B | 109.0     |
| C54B-C53B-H53D | 109.4     | C60B-C61B-H61C | 109.4     |

|                |           |                |           |
|----------------|-----------|----------------|-----------|
| C60B–C61B–H61D | 109.4     | C64A–C63A–H63B | 109.6     |
| H61C–C61B–H61D | 108.0     | C62B–C63B–H63C | 109.3     |
| C62B–C61B–C60B | 111.2(17) | C62B–C63B–H63D | 109.3     |
| C62B–C61B–H61C | 109.4     | C62B–C63B–C64B | 111.7(15) |
| C62B–C61B–H61D | 109.4     | H63C–C63B–H63D | 107.9     |
| C61A–C62A–H62A | 109.3     | C64B–C63B–H63C | 109.3     |
| C61A–C62A–H62B | 109.3     | C64B–C63B–H63D | 109.3     |
| C61A–C62A–C63A | 111.4(7)  | C59A–C64A–C63A | 109.6(7)  |
| H62A–C62A–H62B | 108.0     | C59A–C64A–H64A | 109.7     |
| C63A–C62A–H62A | 109.3     | C59A–C64A–H64B | 109.7     |
| C63A–C62A–H62B | 109.3     | C63A–C64A–H64A | 109.7     |
| C61B–C62B–H62C | 109.2     | C63A–C64A–H64B | 109.7     |
| C61B–C62B–H62D | 109.2     | H64A–C64A–H64B | 108.2     |
| C61B–C62B–C63B | 112.1(15) | C59B–C64B–C63B | 113.0(16) |
| H62C–C62B–H62D | 107.9     | C59B–C64B–H64C | 109.0     |
| C63B–C62B–H62C | 109.2     | C59B–C64B–H64D | 109.0     |
| C63B–C62B–H62D | 109.2     | C63B–C64B–H64C | 109.0     |
| C62A–C63A–H63A | 109.6     | C63B–C64B–H64D | 109.0     |
| C62A–C63A–H63B | 109.6     | H64C–C64B–H64D | 107.8     |
| C62A–C63A–C64A | 110.5(7)  |                |           |
| H63A–C63A–H63B | 108.1     |                |           |
| C64A–C63A–H63A | 109.6     |                |           |

Symmetry transformations used to generate equivalent atoms:  
 #1: -1+X, -1+Y, -1+Z; #2: 1+X, +Y, +Z; #3: -1+X, +Y, +Z; #4:  
 1+X, 1+Y, 1+Z;

**Table S15. Torsion angles for CP1\_200K**

| <b>Atom–Atom–Atom–Atom</b>      | <b>Torsion Angle<br/>[°]</b> |                   |            |
|---------------------------------|------------------------------|-------------------|------------|
| Cu1–S1–C1A–C2A                  | 51.9(5)                      | Cu8–S7–C49B–C54B  | –27.5(11)  |
| Cu1–S1–C1A–C6A                  | 174.4(4)                     | Cu8–S7–C55–C56    | –158.0(4)  |
| Cu1–S1–C1B–C2B                  | –51.8(11)                    | S1–C1A–C2A–C3A    | 177.1(10)  |
| Cu1–S1–C1B–C6B                  | –176.8(9)                    | S1–C1A–C6A–C5A    | –175.6(6)  |
| Cu1–S1–C7–C8                    | –157.9(4)                    | S1–C1B–C2B–C3B    | 173(2)     |
| Cu2 <sup>#1</sup> –S8–C58–C57   | 159.1(4)                     | S1–C1B–C6B–C5B    | 177.1(11)  |
| Cu2 <sup>#1</sup> –S8–C59A–C60A | 175.1(5)                     | S2–C11–C12–C13    | –178.5(4)  |
| Cu2 <sup>#1</sup> –S8–C59A–C64A | 49.0(6)                      | S2–C11–C16–C15    | –179.2(5)  |
| Cu2 <sup>#1</sup> –S8–C59B–C60B | –99.6(10)                    | S3–C17A–C18A–C19A | –175.0(5)  |
| Cu2 <sup>#1</sup> –S8–C59B–C64B | 24.2(14)                     | S3–C17A–C22A–C21A | –179.1(6)  |
| Cu3 <sup>#2</sup> –S2–C10–C9    | 159.6(3)                     | S3–C17B–C18B–C19B | 174.2(12)  |
| Cu3 <sup>#2</sup> –S2–C11–C12   | –90.0(3)                     | S3–C17B–C22B–C21B | –174.3(12) |
| Cu3 <sup>#2</sup> –S2–C11–C16   | 34.3(4)                      | S4–C27–C28A–C29A  | 179.7(7)   |
| Cu4–S3–C17A–C18A                | 30.4(6)                      | S4–C27–C28B–C29B  | 174.7(18)  |
| Cu4–S3–C17A–C22A                | –92.4(5)                     | S4–C27–C32A–C31A  | –174.3(8)  |
| Cu4–S3–C23–C24                  | 150.2(4)                     | S4–C27–C32B–C31B  | –174.8(15) |
| Cu5–S5–C33–C34                  | 84.8(3)                      | S5–C33–C34–C35    | 178.0(4)   |
| Cu5–S5–C33–C38                  | –39.7(4)                     | S5–C33–C38–C37    | 179.0(5)   |
| Cu5–S5–C39–C40                  | –172.1(4)                    | S6–C43–C44–C45    | 175.3(4)   |
| Cu6–S4–C26–C25                  | –165.0(4)                    | S6–C43–C48–C47    | –176.4(4)  |
| Cu6–S4–C27–C28A                 | 175.8(5)                     | S7–C49A–C50A–C51A | 177.8(9)   |
| Cu6–S4–C27–C28B                 | 100.4(11)                    | S7–C49A–C54A–C53A | –178.3(7)  |
| Cu6–S4–C27–C32A                 | 46.1(6)                      | S7–C49B–C50B–C51B | –178.5(12) |
| Cu6–S4–C27–C32B                 | –42.5(13)                    | S7–C49B–C54B–C53B | 171.1(9)   |
| Cu7 <sup>#2</sup> –S6–C42–C41   | 139.3(4)                     | S8–C59A–C60A–C61A | 178.7(7)   |
| Cu7 <sup>#2</sup> –S6–C43–C44   | 172.8(3)                     | S8–C59A–C64A–C63A | –177.7(6)  |
| Cu7 <sup>#2</sup> –S6–C43–C48   | 45.1(4)                      | S8–C59B–C60B–C61B | 175.8(13)  |
| Cu8–S7–C49A–C50A                | –43.1(9)                     | S8–C59B–C64B–C63B | –170.7(12) |
| Cu8–S7–C49A–C54A                | –173.1(6)                    | C1A–S1–C7–C8      | 90.9(4)    |
| Cu8–S7–C49B–C50B                | 94.9(8)                      | C1A–C2A–C3A–C4A   | –53.6(18)  |
|                                 |                              | C1B–S1–C7–C8      | 78.5(6)    |
|                                 |                              | C1B–C2B–C3B–C4B   | 52(5)      |

|                     |            |                     |           |
|---------------------|------------|---------------------|-----------|
| C2A-C1A-C6A-C5A     | -55.1(9)   | C33-C34-C35-C36     | 56.3(7)   |
| C2A-C3A-C4A-C5A     | 57(2)      | C34-C33-C38-C37     | 56.1(7)   |
| C2B-C1B-C6B-C5B     | 53.4(18)   | C34-C35-C36-C37     | -56.7(8)  |
| C2B-C3B-C4B-C5B     | -31(6)     | C35-C36-C37-C38     | 56.3(8)   |
| C3A-C4A-C5A-C6A     | -55.6(19)  | C36-C37-C38-C33     | -55.6(8)  |
| C3B-C4B-C5B-C6B     | 22(4)      | C38-C33-C34-C35     | -56.6(6)  |
| C4A-C5A-C6A-C1A     | 53.6(13)   | C39-S5-C33-C34      | -164.9(3) |
| C4B-C5B-C6B-C1B     | -34(2)     | C39-S5-C33-C38      | 70.6(4)   |
| C6A-C1A-C2A-C3A     | 56.2(12)   | C42-S6-C43-C44      | 60.6(4)   |
| C6B-C1B-C2B-C3B     | -62(3)     | C42-S6-C43-C48      | -67.1(4)  |
| C7-S1-C1A-C2A       | 154.1(4)   | C43-S6-C42-C41      | -104.2(4) |
| C7-S1-C1A-C6A       | -83.4(5)   | C43-C44-C45-C46     | 55.7(7)   |
| C7-S1-C1B-C2B       | 65.6(11)   | C44-C43-C48-C47     | 55.8(6)   |
| C7-S1-C1B-C6B       | -59.3(12)  | C44-C45-C46-C47     | -56.3(8)  |
| C10-S2-C11-C12      | 157.9(3)   | C45-C46-C47-C48     | 55.4(7)   |
| C10-S2-C11-C16      | -77.9(4)   | C46-C47-C48-C43     | -55.1(6)  |
| C11-S2-C10-C9       | -80.5(4)   | C48-C43-C44-C45     | -55.7(6)  |
| C11-C12-C13-C14     | -54.7(8)   | C49A-S7-C55-C56     | 88.3(5)   |
| C12-C11-C16-C15     | -57.0(6)   | C49A-C50A-C51A-C52A | 57.4(16)  |
| C12-C13-C14-C15     | 54.9(9)    | C49B-S7-C55-C56     | 84.6(5)   |
| C13-C14-C15-C16     | -55.5(9)   | C49B-C50B-C51B-C52B | 50(2)     |
| C14-C15-C16-C11     | 55.9(8)    | C50A-C49A-C54A-C53A | 51.1(12)  |
| C16-C11-C12-C13     | 56.9(6)    | C50A-C51A-C52A-C53A | -59.3(16) |
| C17A-S3-C23-C24     | -91.4(4)   | C50B-C49B-C54B-C53B | 55.2(15)  |
| C17A-C18A-C19A-C20A | 54.4(9)    | C50B-C51B-C52B-C53B | -51(2)    |
| C17B-S3-C23-C24     | -95.9(6)   | C51A-C52A-C53A-C54A | 58.3(14)  |
| C17B-C18B-C19B-C20B | -55(2)     | C51B-C52B-C53B-C54B | 54(2)     |
| C18A-C17A-C22A-C21A | 55.9(9)    | C52A-C53A-C54A-C49A | -53.2(12) |
| C18A-C19A-C20A-C21A | -56.6(10)  | C52B-C53B-C54B-C49B | -55.2(16) |
| C18B-C17B-C22B-C21B | -51.6(19)  | C54A-C49A-C50A-C51A | -54.0(14) |
| C18B-C19B-C20B-C21B | 56(2)      | C54B-C49B-C50B-C51B | -52.0(17) |
| C19A-C20A-C21A-C22A | 57.0(11)   | C55-S7-C49A-C50A    | 65.6(8)   |
| C19B-C20B-C21B-C22B | -56(2)     | C55-S7-C49A-C54A    | -64.4(8)  |
| C20A-C21A-C22A-C17A | -56.7(10)  | C55-S7-C49B-C50B    | -165.4(9) |
| C20B-C21B-C22B-C17B | 51(2)      | C55-S7-C49B-C54B    | 72.3(10)  |
| C22A-C17A-C18A-C19A | -55.3(8)   | C58-S8-C59A-C60A    | 62.9(6)   |
| C22B-C17B-C18B-C19B | 55(2)      | C58-S8-C59A-C64A    | -63.2(6)  |
| C23-S3-C17A-C18A    | -75.6(5)   | C58-S8-C59B-C60B    | 154.8(11) |
| C23-S3-C17A-C22A    | 161.6(5)   | C58-S8-C59B-C64B    | -81.5(12) |
| C26-S4-C27-C28A     | -77.6(6)   | C59A-S8-C58-C57     | -87.8(5)  |
| C26-S4-C27-C28B     | -153.0(11) | C59A-C60A-C61A-C62A | 54.9(11)  |
| C26-S4-C27-C32A     | 152.7(6)   | C59B-S8-C58-C57     | -79.9(6)  |
| C26-S4-C27-C32B     | 64.1(13)   | C59B-C60B-C61B-C62B | -53(2)    |
| C27-S4-C26-C25      | 81.7(5)    | C60A-C59A-C64A-C63A | 56.4(10)  |
| C27-C28A-C29A-C30A  | 52.7(13)   | C60A-C61A-C62A-C63A | -56.8(11) |
| C27-C28B-C29B-C30B  | 40(3)      | C60B-C59B-C64B-C63B | -51(2)    |
| C28A-C27-C32A-C31A  | 54.2(12)   | C60B-C61B-C62B-C63B | 54(2)     |
| C28A-C29A-C30A-C31A | -53.9(16)  | C61A-C62A-C63A-C64A | 57.5(11)  |
| C28B-C27-C32B-C31B  | 48(3)      | C61B-C62B-C63B-C64B | -53(2)    |
| C28B-C29B-C30B-C31B | -56(4)     | C62A-C63A-C64A-C59A | -56.8(11) |
| C29A-C30A-C31A-C32A | 54.4(16)   | C62B-C63B-C64B-C59B | 52(2)     |
| C29B-C30B-C31B-C32B | 62(4)      | C64A-C59A-C60A-C61A | -54.6(10) |
| C30A-C31A-C32A-C27  | -53.9(14)  | C64B-C59B-C60B-C61B | 52(2)     |
| C30B-C31B-C32B-C27  | -57(3)     |                     |           |
| C32A-C27-C28A-C29A  | -51.4(11)  |                     |           |
| C32B-C27-C28B-C29B  | -40(3)     |                     |           |
| C33-S5-C39-C40      | 69.5(4)    |                     |           |

Symmetry transformations used to generate equivalent atoms:  
#1: 1+X, 1+Y, 1+Z; #2: -1+X, +Y, +Z;



## Crystal structure of CP1\_250K

### Crystal Data and Experimental

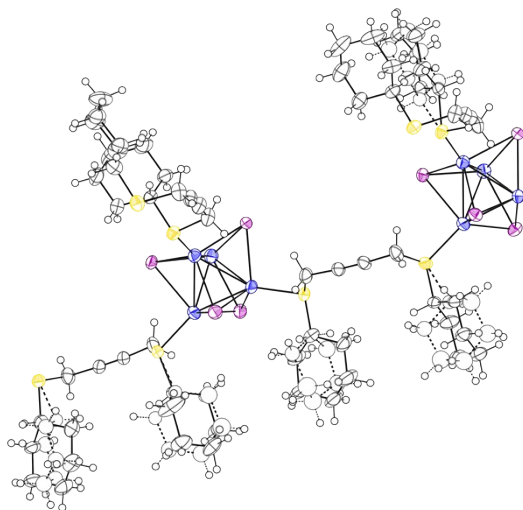

**Experimental:** The data for CP1\_250K were collected from a shock-cooled single crystal at 250.0(1) K on a Bruker D8 Venture four-circle diffractometer with a X-ray tube using a graphite as monochromator and a CPAD PHOTON II area detector detector. The diffractometer was equipped with an Oxford Cryostream 800 low temperature device and used Mo  $K_{\alpha}$  radiation ( $\lambda = 0.71073 \text{ \AA}$ ). All data were integrated with SAINT V8.38A and a multi-scan absorption correction using SADABS 2016/2 was applied.<sup>[1,2]</sup> The structure was solved by direct methods with XT and refined by full-matrix least-squares methods against  $F^2$  using SHELXL.<sup>[3,4]</sup> All non-hydrogen atoms were refined with anisotropic displacement parameters, excepted minor disordered parts. For each compound, some disorders were found in the crystal structure and some geometric parameters of disordered components in each group were restrained by using RIGU or DFIX restraints. For more detail see the .res file included in the cif files. The hydrogen atoms were refined isotropically on calculated positions using a riding model with their  $U_{\text{iso}}$  values constrained to 1.5 times the  $U_{\text{eq}}$  of their pivot atoms for terminal  $\text{sp}^3$  carbon atoms and 1.2 times for all other carbon atoms. Crystallographic data for the structures reported in this paper have been deposited with the Cambridge Crystallographic Data Centre.<sup>[5]</sup> CCDC 2326780 contain the supplementary crystallographic data for this paper. These data can be obtained free of charge from The Cambridge Crystallographic Data Centre via [www.ccdc.cam.ac.uk/structures](http://www.ccdc.cam.ac.uk/structures). This report and the CIF file were generated using FinalCif.<sup>[6]</sup>

**Table S16.** Crystal data and structure refinement for CP1\_250K

|                                                 |                                                                      |
|-------------------------------------------------|----------------------------------------------------------------------|
| Internal Reference                              | CP1_250K                                                             |
| CCDC number                                     | 2326780                                                              |
| Empirical formula                               | $\text{C}_{64}\text{H}_{104}\text{Cu}_8\text{I}_8\text{S}_8$         |
| Formula weight                                  | 2653.47                                                              |
| Temperature [K]                                 | 250.0(1)                                                             |
| Crystal system                                  | triclinic                                                            |
| Space group (number)                            | $P\bar{1}$ (2)                                                       |
| $a$ [ $\text{\AA}$ ]                            | 11.8961(4)                                                           |
| $b$ [ $\text{\AA}$ ]                            | 18.9380(7)                                                           |
| $c$ [ $\text{\AA}$ ]                            | 20.9008(7)                                                           |
| $\alpha$ [ $^\circ$ ]                           | 97.0884(14)                                                          |
| $\beta$ [ $^\circ$ ]                            | 104.7460(13)                                                         |
| $\gamma$ [ $^\circ$ ]                           | 104.3167(13)                                                         |
| Volume [ $\text{\AA}^3$ ]                       | 4324.1(3)                                                            |
| $Z$                                             | 2                                                                    |
| $\rho_{\text{calc}}$ [ $\text{gcm}^{-3}$ ]      | 2.038                                                                |
| $\mu$ [ $\text{mm}^{-1}$ ]                      | 5.011                                                                |
| $F(000)$                                        | 2544                                                                 |
| Crystal size [ $\text{mm}^3$ ]                  | 0.084 $\times$ 0.133 $\times$ 0.172                                  |
| Crystal colour                                  | clear light colourless                                               |
| Crystal shape                                   | block                                                                |
| Radiation                                       | Mo $K_{\alpha}$ ( $\lambda=0.71073 \text{ \AA}$ )                    |
| $2\theta$ range [ $^\circ$ ]                    | 4.28 to 55.00 (0.77 $\text{\AA}$ )                                   |
| Index ranges                                    | $-15 \leq h \leq 15$<br>$-24 \leq k \leq 24$<br>$-27 \leq l \leq 27$ |
| Reflections collected                           | 260876                                                               |
| Independent reflections                         | 19874<br>$R_{\text{int}} = 0.0369$<br>$R_{\text{sigma}} = 0.0172$    |
| Completeness to $\theta = 25.242^\circ$         | 99.9 %                                                               |
| Data / Restraints / Parameters                  | 19874 / 734 / 914                                                    |
| Goodness-of-fit on $F^2$                        | 1.067                                                                |
| Final $R$ indexes [ $I \geq 2\sigma(I)$ ]       | $R_1 = 0.0397$<br>$wR_2 = 0.0899$                                    |
| Final $R$ indexes [all data]                    | $R_1 = 0.0557$<br>$wR_2 = 0.1021$                                    |
| Largest peak/hole [ $\text{e}\text{\AA}^{-3}$ ] | 1.61/−0.72                                                           |

**Table S17. Bond lengths and angles for CP1\_250K**

| <b>Atom–Atom</b>     | <b>Length [Å]</b> |          |           |
|----------------------|-------------------|----------|-----------|
| I1–Cu1               | 2.7214(8)         | S5–C33   | 1.815(6)  |
| I1–Cu2               | 2.6972(8)         | S5–C39   | 1.810(7)  |
| I1–Cu3               | 2.6694(8)         | S6–C42   | 1.825(7)  |
| I2–Cu1               | 2.7350(8)         | S6–C43   | 1.803(8)  |
| I2–Cu2               | 2.6469(8)         | S7–C55   | 1.806(8)  |
| I2–Cu4               | 2.6828(9)         | S7–C49A  | 1.833(10) |
| I3–Cu1               | 2.5997(8)         | S7–C49B  | 1.921(17) |
| I3–Cu3               | 2.6301(9)         | S8–C58   | 1.801(7)  |
| I3–Cu4               | 2.7957(8)         | S8–C59A  | 1.844(9)  |
| I4–Cu2               | 2.6760(8)         | S8–C59B  | 1.83(2)   |
| I4–Cu3               | 2.7720(8)         | C7–H7A   | 0.9800    |
| I4–Cu4               | 2.6317(9)         | C7–H7B   | 0.9800    |
| I5–Cu5               | 2.6819(8)         | C7–C8    | 1.452(8)  |
| I5–Cu6               | 2.6867(8)         | C8–C9    | 1.175(8)  |
| I5–Cu7               | 2.6970(8)         | C9–C10   | 1.456(8)  |
| I6–Cu5               | 2.7704(8)         | C10–H10A | 0.9800    |
| I6–Cu6               | 2.6919(9)         | C10–H10B | 0.9800    |
| I6–Cu8               | 2.6213(9)         | C11–H11  | 0.9900    |
| I7–Cu5               | 2.6229(8)         | C11–C12  | 1.513(9)  |
| I7–Cu7               | 2.6141(9)         | C11–C16  | 1.510(9)  |
| I7–Cu8               | 2.8250(8)         | C12–H12A | 0.9800    |
| I8–Cu6               | 2.6426(9)         | C12–H12B | 0.9800    |
| I8–Cu7               | 2.6890(9)         | C12–C13  | 1.521(10) |
| I8–Cu8               | 2.6957(10)        | C13–H13A | 0.9800    |
| Cu1–Cu2              | 2.7326(10)        | C13–H13B | 0.9800    |
| Cu1–Cu3              | 2.6218(10)        | C13–C14  | 1.501(14) |
| Cu1–Cu4              | 2.7962(10)        | C14–H14A | 0.9800    |
| Cu1–S1               | 2.2912(15)        | C14–H14B | 0.9800    |
| Cu2–Cu3              | 2.8302(10)        | C14–C15  | 1.471(15) |
| Cu2–Cu4              | 2.7029(10)        | C15–H15A | 0.9800    |
| Cu2–S8 <sup>#1</sup> | 2.3087(15)        | C15–H15B | 0.9800    |
| Cu3–Cu4              | 2.7507(11)        | C15–C16  | 1.558(11) |
| Cu3–S2 <sup>#2</sup> | 2.2863(16)        | C16–H16A | 0.9800    |
| Cu4–S3               | 2.3019(16)        | C16–H16B | 0.9800    |
| Cu5–Cu6              | 2.8416(10)        | C23–H23A | 0.9800    |
| Cu5–Cu7              | 2.6683(11)        | C23–H23B | 0.9800    |
| Cu5–Cu8              | 2.7429(10)        | C23–C24  | 1.457(8)  |
| Cu5–S5               | 2.2928(17)        | C24–C25  | 1.167(8)  |
| Cu6–Cu7              | 2.7660(10)        | C25–C26  | 1.465(8)  |
| Cu6–Cu8              | 2.6962(10)        | C26–H26A | 0.9800    |
| Cu6–S4               | 2.3114(15)        | C26–H26B | 0.9800    |
| Cu7–Cu8              | 2.7876(11)        | C27–H27  | 0.9900    |
| Cu7–S6 <sup>#2</sup> | 2.2967(18)        | C27–H27A | 0.9900    |
| Cu8–S7               | 2.2997(16)        | C27–C28A | 1.436(11) |
| S1–C7                | 1.811(6)          | C27–C32A | 1.513(14) |
| S1–C1A               | 1.902(9)          | C27–C28B | 1.51(3)   |
| S1–C1B               | 1.748(16)         | C27–C32B | 1.34(2)   |
| S2–C10               | 1.809(7)          | C33–H33  | 0.9900    |
| S2–C11               | 1.820(6)          | C33–C34  | 1.497(9)  |
| S3–C23               | 1.828(8)          | C33–C38  | 1.485(9)  |
| S3–C17A              | 1.845(9)          | C34–H34A | 0.9800    |
| S3–C17B              | 1.911(18)         | C34–H34B | 0.9800    |
| S4–C26               | 1.812(7)          | C34–C35  | 1.537(10) |
| S4–C27               | 1.809(7)          | C35–H35A | 0.9800    |
|                      |                   | C35–H35B | 0.9800    |

|          |           |           |           |
|----------|-----------|-----------|-----------|
| C35-C36  | 1.466(12) | C17A-H17A | 0.9900    |
| C36-H36A | 0.9800    | C17A-C18A | 1.527(12) |
| C36-H36B | 0.9800    | C17A-C22A | 1.498(14) |
| C36-C37  | 1.492(14) | C18A-H18A | 0.9800    |
| C37-H37A | 0.9800    | C18A-H18B | 0.9800    |
| C37-H37B | 0.9800    | C18A-C19A | 1.518(13) |
| C37-C38  | 1.553(10) | C19A-H19A | 0.9800    |
| C38-H38A | 0.9800    | C19A-H19B | 0.9800    |
| C38-H38B | 0.9800    | C19A-C20A | 1.505(18) |
| C39-H39A | 0.9800    | C20A-H20A | 0.9800    |
| C39-H39B | 0.9800    | C20A-H20B | 0.9800    |
| C39-C40  | 1.466(9)  | C20A-C21A | 1.497(19) |
| C40-C41  | 1.184(9)  | C21A-H21A | 0.9800    |
| C41-C42  | 1.454(9)  | C21A-H21B | 0.9800    |
| C42-H42A | 0.9800    | C21A-C22A | 1.564(16) |
| C42-H42B | 0.9800    | C22A-H22A | 0.9800    |
| C43-H43  | 0.9900    | C22A-H22B | 0.9800    |
| C43-C44  | 1.497(10) | C28A-H28A | 0.9800    |
| C43-C48  | 1.478(10) | C28A-H28B | 0.9800    |
| C44-H44A | 0.9800    | C28A-C29A | 1.475(15) |
| C44-H44B | 0.9800    | C29A-H29A | 0.9800    |
| C44-C45  | 1.545(13) | C29A-H29B | 0.9800    |
| C45-H45A | 0.9800    | C29A-C30A | 1.402(17) |
| C45-H45B | 0.9800    | C30A-H30A | 0.9800    |
| C45-C46  | 1.495(13) | C30A-H30B | 0.9800    |
| C46-H46A | 0.9800    | C30A-C31A | 1.516(16) |
| C46-H46B | 0.9800    | C31A-H31A | 0.9800    |
| C46-C47  | 1.492(12) | C31A-H31B | 0.9800    |
| C47-H47A | 0.9800    | C31A-C32A | 1.503(19) |
| C47-H47B | 0.9800    | C32A-H32A | 0.9800    |
| C47-C48  | 1.551(10) | C32A-H32B | 0.9800    |
| C48-H48A | 0.9800    | C49A-H49A | 0.9900    |
| C48-H48B | 0.9800    | C49A-C50A | 1.475(14) |
| C55-H55A | 0.9800    | C49A-C54A | 1.484(19) |
| C55-H55B | 0.9800    | C50A-H50A | 0.9800    |
| C55-C56  | 1.467(8)  | C50A-H50B | 0.9800    |
| C56-C57  | 1.172(8)  | C50A-C51A | 1.532(15) |
| C57-C58  | 1.467(8)  | C51A-H51A | 0.9800    |
| C58-H58A | 0.9800    | C51A-H51B | 0.9800    |
| C58-H58B | 0.9800    | C51A-C52A | 1.52(2)   |
| C1A-H1A  | 0.9900    | C52A-H52A | 0.9800    |
| C1A-C2A  | 1.529(13) | C52A-H52B | 0.9800    |
| C1A-C6A  | 1.521(13) | C52A-C53A | 1.41(2)   |
| C2A-H2AA | 0.9800    | C53A-H53A | 0.9800    |
| C2A-H2AB | 0.9800    | C53A-H53B | 0.9800    |
| C2A-C3A  | 1.50(2)   | C53A-C54A | 1.59(2)   |
| C3A-H3AA | 0.9800    | C54A-H54A | 0.9800    |
| C3A-H3AB | 0.9800    | C54A-H54B | 0.9800    |
| C3A-C4A  | 1.52(2)   | C59A-H59A | 0.9900    |
| C4A-H4AA | 0.9800    | C59A-C60A | 1.501(14) |
| C4A-H4AB | 0.9800    | C59A-C64A | 1.514(14) |
| C4A-C5A  | 1.51(2)   | C60A-H60A | 0.9800    |
| C5A-H5AA | 0.9800    | C60A-H60B | 0.9800    |
| C5A-H5AB | 0.9800    | C60A-C61A | 1.541(16) |
| C5A-C6A  | 1.522(17) | C61A-H61A | 0.9800    |
| C6A-H6AA | 0.9800    | C61A-H61B | 0.9800    |
| C6A-H6AB | 0.9800    | C61A-C62A | 1.444(18) |

|           |           |                       |                  |
|-----------|-----------|-----------------------|------------------|
| C62A–H62A | 0.9800    | C49B–C50B             | 1.46(2)          |
| C62A–H62B | 0.9800    | C49B–C54B             | 1.498(19)        |
| C62A–C63A | 1.474(18) | C50B–H50C             | 0.9800           |
| C63A–H63A | 0.9800    | C50B–H50D             | 0.9800           |
| C63A–H63B | 0.9800    | C50B–C51B             | 1.52(3)          |
| C63A–C64A | 1.525(15) | C51B–H51C             | 0.9800           |
| C64A–H64A | 0.9800    | C51B–H51D             | 0.9800           |
| C64A–H64B | 0.9800    | C51B–C52B             | 1.61(3)          |
| C1B–H1B   | 0.9900    | C52B–H52C             | 0.9800           |
| C1B–C2B   | 1.50(2)   | C52B–H52D             | 0.9800           |
| C1B–C6B   | 1.48(2)   | C52B–C53B             | 1.44(2)          |
| C2B–H2BA  | 0.9800    | C53B–H53C             | 0.9800           |
| C2B–H2BB  | 0.9800    | C53B–H53D             | 0.9800           |
| C2B–C3B   | 1.57(4)   | C53B–C54B             | 1.49(2)          |
| C3B–H3BA  | 0.9800    | C54B–H54C             | 0.9800           |
| C3B–H3BB  | 0.9800    | C54B–H54D             | 0.9800           |
| C3B–C4B   | 1.49(4)   | C59B–H59B             | 0.9900           |
| C4B–H4BA  | 0.9800    | C59B–C60B             | 1.56(3)          |
| C4B–H4BB  | 0.9800    | C59B–C64B             | 1.41(3)          |
| C4B–C5B   | 1.49(3)   | C60B–H60C             | 0.9800           |
| C5B–H5BA  | 0.9800    | C60B–H60D             | 0.9800           |
| C5B–H5BB  | 0.9800    | C60B–C61B             | 1.53(3)          |
| C5B–C6B   | 1.54(3)   | C61B–H61C             | 0.9800           |
| C6B–H6BA  | 0.9800    | C61B–H61D             | 0.9800           |
| C6B–H6BB  | 0.9800    | C61B–C62B             | 1.43(3)          |
| C17B–H17B | 0.9900    | C62B–H62C             | 0.9800           |
| C17B–C18B | 1.43(2)   | C62B–H62D             | 0.9800           |
| C17B–C22B | 1.54(2)   | C62B–C63B             | 1.55(4)          |
| C18B–H18C | 0.9800    | C63B–H63C             | 0.9800           |
| C18B–H18D | 0.9800    | C63B–H63D             | 0.9800           |
| C18B–C19B | 1.51(3)   | C63B–C64B             | 1.55(3)          |
| C19B–H19C | 0.9800    | C64B–H64C             | 0.9800           |
| C19B–H19D | 0.9800    | C64B–H64D             | 0.9800           |
| C19B–C20B | 1.51(3)   |                       |                  |
| C20B–H20C | 0.9800    | <b>Atom–Atom–Atom</b> | <b>Angle [°]</b> |
| C20B–H20D | 0.9800    | Cu2–I1–Cu1            | 60.57(2)         |
| C20B–C21B | 1.47(3)   | Cu3–I1–Cu1            | 58.19(2)         |
| C21B–H21C | 0.9800    | Cu3–I1–Cu2            | 63.65(2)         |
| C21B–H21D | 0.9800    | Cu2–I2–Cu1            | 61.00(2)         |
| C21B–C22B | 1.49(3)   | Cu2–I2–Cu4            | 60.94(2)         |
| C22B–H22C | 0.9800    | Cu4–I2–Cu1            | 62.14(2)         |
| C22B–H22D | 0.9800    | Cu1–I3–Cu3            | 60.17(2)         |
| C28B–H28C | 0.9800    | Cu1–I3–Cu4            | 62.31(2)         |
| C28B–H28D | 0.9800    | Cu3–I3–Cu4            | 60.83(2)         |
| C28B–C29B | 1.51(3)   | Cu2–I4–Cu3            | 62.57(2)         |
| C29B–H29C | 0.9800    | Cu4–I4–Cu2            | 61.22(2)         |
| C29B–H29D | 0.9800    | Cu4–I4–Cu3            | 61.13(2)         |
| C29B–C30B | 1.50(4)   | Cu5–I5–Cu6            | 63.91(2)         |
| C30B–H30C | 0.9800    | Cu5–I5–Cu7            | 59.48(2)         |
| C30B–H30D | 0.9800    | Cu6–I5–Cu7            | 61.83(2)         |
| C30B–C31B | 1.43(4)   | Cu6–I6–Cu5            | 62.67(2)         |
| C31B–H31C | 0.9800    | Cu8–I6–Cu5            | 61.08(2)         |
| C31B–H31D | 0.9800    | Cu8–I6–Cu6            | 60.97(2)         |
| C31B–C32B | 1.55(3)   | Cu5–I7–Cu8            | 60.33(2)         |
| C32B–H32C | 0.9800    | Cu7–I7–Cu5            | 61.26(2)         |
| C32B–H32D | 0.9800    | Cu7–I7–Cu8            | 61.52(2)         |
| C49B–H49B | 0.9900    | Cu6–I8–Cu7            | 62.49(2)         |

|                           |           |                           |           |
|---------------------------|-----------|---------------------------|-----------|
| Cu6-I8-Cu8                | 60.66(2)  | Cu4-Cu3-I4                | 56.91(2)  |
| Cu7-I8-Cu8                | 62.35(2)  | Cu4-Cu3-Cu2               | 57.91(2)  |
| I1-Cu1-I2                 | 111.39(3) | S2 <sup>#2</sup> -Cu3-I1  | 112.34(5) |
| I1-Cu1-Cu2                | 59.28(2)  | S2 <sup>#2</sup> -Cu3-I3  | 108.56(5) |
| I1-Cu1-Cu4                | 106.93(3) | S2 <sup>#2</sup> -Cu3-I4  | 97.95(5)  |
| I2-Cu1-Cu4                | 58.02(2)  | S2 <sup>#2</sup> -Cu3-Cu1 | 153.78(5) |
| I3-Cu1-I1                 | 114.79(3) | S2 <sup>#2</sup> -Cu3-Cu2 | 141.79(5) |
| I3-Cu1-I2                 | 111.81(3) | S2 <sup>#2</sup> -Cu3-Cu4 | 135.88(5) |
| I3-Cu1-Cu2                | 112.17(3) | I2-Cu4-I3                 | 107.50(3) |
| I3-Cu1-Cu3                | 60.49(2)  | I2-Cu4-Cu1                | 59.85(2)  |
| I3-Cu1-Cu4                | 62.28(2)  | I2-Cu4-Cu2                | 58.87(2)  |
| Cu2-Cu1-I2                | 57.91(2)  | I2-Cu4-Cu3                | 108.09(3) |
| Cu2-Cu1-Cu4               | 58.52(2)  | I3-Cu4-Cu1                | 55.41(2)  |
| Cu3-Cu1-I1                | 59.91(2)  | I4-Cu4-I2                 | 113.49(3) |
| Cu3-Cu1-I2                | 110.37(3) | I4-Cu4-I3                 | 113.46(3) |
| Cu3-Cu1-Cu2               | 63.78(3)  | I4-Cu4-Cu1                | 107.22(3) |
| Cu3-Cu1-Cu4               | 60.92(3)  | I4-Cu4-Cu2                | 60.20(2)  |
| S1-Cu1-I1                 | 107.49(5) | I4-Cu4-Cu3                | 61.95(2)  |
| S1-Cu1-I2                 | 96.30(5)  | Cu2-Cu4-I3                | 107.19(3) |
| S1-Cu1-I3                 | 113.53(5) | Cu2-Cu4-Cu1               | 59.56(3)  |
| S1-Cu1-Cu2                | 133.39(5) | Cu2-Cu4-Cu3               | 62.52(3)  |
| S1-Cu1-Cu3                | 153.07(5) | Cu3-Cu4-I3                | 56.61(2)  |
| S1-Cu1-Cu4                | 142.89(5) | Cu3-Cu4-Cu1               | 56.41(3)  |
| I1-Cu2-Cu1                | 60.15(2)  | S3-Cu4-I2                 | 109.90(5) |
| I1-Cu2-Cu3                | 57.69(2)  | S3-Cu4-I3                 | 94.26(4)  |
| I1-Cu2-Cu4                | 110.38(3) | S3-Cu4-I4                 | 116.43(6) |
| I2-Cu2-I1                 | 115.00(3) | S3-Cu4-Cu1                | 134.54(6) |
| I2-Cu2-I4                 | 113.21(3) | S3-Cu4-Cu2                | 157.85(5) |
| I2-Cu2-Cu1                | 61.09(2)  | S3-Cu4-Cu3                | 137.72(5) |
| I2-Cu2-Cu3                | 106.80(3) | I5-Cu5-I6                 | 107.74(3) |
| I2-Cu2-Cu4                | 60.18(2)  | I5-Cu5-Cu6                | 58.12(2)  |
| I4-Cu2-I1                 | 108.85(3) | I5-Cu5-Cu8                | 108.13(3) |
| I4-Cu2-Cu1                | 107.81(3) | I6-Cu5-Cu6                | 57.31(2)  |
| I4-Cu2-Cu3                | 60.38(2)  | I7-Cu5-I5                 | 113.69(3) |
| I4-Cu2-Cu4                | 58.58(2)  | I7-Cu5-I6                 | 114.71(3) |
| Cu1-Cu2-Cu3               | 56.21(3)  | I7-Cu5-Cu6                | 108.99(3) |
| Cu4-Cu2-Cu1               | 61.92(3)  | I7-Cu5-Cu7                | 59.20(2)  |
| Cu4-Cu2-Cu3               | 59.57(3)  | I7-Cu5-Cu8                | 63.49(2)  |
| S8 <sup>#1</sup> -Cu2-I1  | 100.58(4) | Cu7-Cu5-I5                | 60.54(2)  |
| S8 <sup>#1</sup> -Cu2-I2  | 104.06(5) | Cu7-Cu5-I6                | 108.08(3) |
| S8 <sup>#1</sup> -Cu2-I4  | 114.54(5) | Cu7-Cu5-Cu6               | 60.17(3)  |
| S8 <sup>#1</sup> -Cu2-Cu1 | 137.41(5) | Cu7-Cu5-Cu8               | 62.00(3)  |
| S8 <sup>#1</sup> -Cu2-Cu3 | 147.78(5) | Cu8-Cu5-I6                | 56.77(2)  |
| S8 <sup>#1</sup> -Cu2-Cu4 | 148.88(5) | Cu8-Cu5-Cu6               | 57.70(2)  |
| I1-Cu3-I4                 | 106.86(3) | S5-Cu5-I5                 | 110.07(5) |
| I1-Cu3-Cu2                | 58.65(2)  | S5-Cu5-I6                 | 97.77(5)  |
| I1-Cu3-Cu4                | 109.76(3) | S5-Cu5-I7                 | 111.70(5) |
| I3-Cu3-I1                 | 115.55(3) | S5-Cu5-Cu6                | 138.57(5) |
| I3-Cu3-I4                 | 114.29(3) | S5-Cu5-Cu7                | 154.07(5) |
| I3-Cu3-Cu2                | 108.24(3) | S5-Cu5-Cu8                | 139.24(6) |
| I3-Cu3-Cu4                | 62.56(2)  | I5-Cu6-I6                 | 109.94(3) |
| I4-Cu3-Cu2                | 57.06(2)  | I5-Cu6-Cu5                | 57.96(2)  |
| Cu1-Cu3-I1                | 61.90(2)  | I5-Cu6-Cu7                | 59.27(2)  |
| Cu1-Cu3-I3                | 59.34(2)  | I5-Cu6-Cu8                | 109.38(3) |
| Cu1-Cu3-I4                | 108.22(3) | I6-Cu6-Cu5                | 60.02(2)  |
| Cu1-Cu3-Cu2               | 60.02(3)  | I6-Cu6-Cu7                | 107.54(3) |
| Cu1-Cu3-Cu4               | 62.67(3)  | I6-Cu6-Cu8                | 58.22(3)  |

|                           |           |                           |          |
|---------------------------|-----------|---------------------------|----------|
| I8-Cu6-I5                 | 112.21(3) | C7-S1-C1A                 | 93.9(4)  |
| I8-Cu6-I6                 | 113.65(3) | C1A-S1-Cu1                | 109.7(3) |
| I8-Cu6-Cu5                | 106.56(3) | C1B-S1-Cu1                | 113.2(5) |
| I8-Cu6-Cu7                | 59.57(2)  | C1B-S1-C7                 | 119.5(7) |
| I8-Cu6-Cu8                | 60.64(3)  | C10-S2-Cu3 <sup>#3</sup>  | 104.9(2) |
| Cu7-Cu6-Cu5               | 56.81(3)  | C10-S2-C11                | 100.6(3) |
| Cu8-Cu6-Cu5               | 59.31(3)  | C11-S2-Cu3 <sup>#3</sup>  | 115.2(2) |
| Cu8-Cu6-Cu7               | 61.36(3)  | C23-S3-Cu4                | 102.7(2) |
| S4-Cu6-I5                 | 102.11(5) | C23-S3-C17A               | 92.6(4)  |
| S4-Cu6-I6                 | 108.18(5) | C23-S3-C17B               | 120.1(6) |
| S4-Cu6-I8                 | 110.06(5) | C17A-S3-Cu4               | 117.1(3) |
| S4-Cu6-Cu5                | 142.99(5) | C17B-S3-Cu4               | 104.0(5) |
| S4-Cu6-Cu7                | 143.73(6) | C26-S4-Cu6                | 101.6(2) |
| S4-Cu6-Cu8                | 148.36(5) | C27-S4-Cu6                | 110.2(3) |
| I5-Cu7-Cu6                | 58.90(2)  | C27-S4-C26                | 101.1(4) |
| I5-Cu7-Cu8                | 106.42(3) | C33-S5-Cu5                | 114.7(2) |
| I7-Cu7-I5                 | 113.48(3) | C39-S5-Cu5                | 103.7(2) |
| I7-Cu7-I8                 | 114.04(3) | C39-S5-C33                | 101.2(3) |
| I7-Cu7-Cu5                | 59.53(2)  | C42-S6-Cu7 <sup>#3</sup>  | 104.3(2) |
| I7-Cu7-Cu6                | 111.59(3) | C43-S6-Cu7 <sup>#3</sup>  | 110.6(2) |
| I7-Cu7-Cu8                | 62.97(3)  | C43-S6-C42                | 106.5(4) |
| I8-Cu7-I5                 | 110.44(3) | C55-S7-Cu8                | 100.3(2) |
| I8-Cu7-Cu6                | 57.93(2)  | C55-S7-C49A               | 92.7(5)  |
| I8-Cu7-Cu8                | 58.94(3)  | C55-S7-C49B               | 117.1(6) |
| Cu5-Cu7-I5                | 59.98(2)  | C49A-S7-Cu8               | 116.0(4) |
| Cu5-Cu7-I8                | 110.34(3) | C49B-S7-Cu8               | 107.6(4) |
| Cu5-Cu7-Cu6               | 63.02(3)  | C58-S8-Cu2 <sup>#4</sup>  | 104.0(2) |
| Cu5-Cu7-Cu8               | 60.32(3)  | C58-S8-C59A               | 109.3(5) |
| Cu6-Cu7-Cu8               | 58.09(3)  | C58-S8-C59B               | 88.1(7)  |
| S6 <sup>#2</sup> -Cu7-I5  | 112.05(5) | C59A-S8-Cu2 <sup>#4</sup> | 106.6(3) |
| S6 <sup>#2</sup> -Cu7-I7  | 108.40(5) | S1-C7-H7A                 | 108.8    |
| S6 <sup>#2</sup> -Cu7-I8  | 97.33(5)  | S1-C7-H7B                 | 108.8    |
| S6 <sup>#2</sup> -Cu7-Cu5 | 152.30(6) | H7A-C7-H7B                | 107.7    |
| S6 <sup>#2</sup> -Cu7-Cu6 | 138.95(6) | C8-C7-S1                  | 113.7(4) |
| S6 <sup>#2</sup> -Cu7-Cu8 | 140.22(6) | C8-C7-H7A                 | 108.8    |
| I6-Cu8-I7                 | 112.96(3) | C8-C7-H7B                 | 108.8    |
| I6-Cu8-I8                 | 114.22(3) | C9-C8-C7                  | 174.3(7) |
| I6-Cu8-Cu5                | 62.14(3)  | C8-C9-C10                 | 173.2(8) |
| I6-Cu8-Cu6                | 60.81(3)  | S2-C10-H10A               | 109.7    |
| I6-Cu8-Cu7                | 108.94(3) | S2-C10-H10B               | 109.7    |
| I8-Cu8-I7                 | 107.35(3) | C9-C10-S2                 | 109.9(5) |
| I8-Cu8-Cu5                | 107.91(3) | C9-C10-H10A               | 109.7    |
| I8-Cu8-Cu6                | 58.70(3)  | C9-C10-H10B               | 109.7    |
| I8-Cu8-Cu7                | 58.70(3)  | H10A-C10-H10B             | 108.2    |
| Cu5-Cu8-I7                | 56.18(2)  | S2-C11-H11                | 107.9    |
| Cu5-Cu8-Cu7               | 57.69(3)  | C12-C11-S2                | 108.6(5) |
| Cu6-Cu8-I7                | 107.40(3) | C12-C11-H11               | 107.9    |
| Cu6-Cu8-Cu5               | 62.98(3)  | C16-C11-S2                | 112.4(5) |
| Cu6-Cu8-Cu7               | 60.55(3)  | C16-C11-H11               | 107.9    |
| Cu7-Cu8-I7                | 55.51(2)  | C16-C11-C12               | 112.0(6) |
| S7-Cu8-I6                 | 116.42(6) | C11-C12-H12A              | 109.5    |
| S7-Cu8-I7                 | 94.03(4)  | C11-C12-H12B              | 109.5    |
| S7-Cu8-I8                 | 109.84(5) | C11-C12-C13               | 110.6(7) |
| S7-Cu8-Cu5                | 137.56(5) | H12A-C12-H12B             | 108.1    |
| S7-Cu8-Cu6                | 157.78(5) | C13-C12-H12A              | 109.5    |
| S7-Cu8-Cu7                | 132.89(6) | C13-C12-H12B              | 109.5    |
| C7-S1-Cu1                 | 100.0(2)  | C12-C13-H13A              | 109.4    |

|               |           |               |          |
|---------------|-----------|---------------|----------|
| C12-C13-H13B  | 109.4     | C33-C34-C35   | 110.1(6) |
| H13A-C13-H13B | 108.0     | H34A-C34-H34B | 108.2    |
| C14-C13-C12   | 111.3(7)  | C35-C34-H34A  | 109.7    |
| C14-C13-H13A  | 109.4     | C35-C34-H34B  | 109.7    |
| C14-C13-H13B  | 109.4     | C34-C35-H35A  | 109.5    |
| C13-C14-H14A  | 109.1     | C34-C35-H35B  | 109.5    |
| C13-C14-H14B  | 109.1     | H35A-C35-H35B | 108.1    |
| H14A-C14-H14B | 107.8     | C36-C35-C34   | 110.8(7) |
| C15-C14-C13   | 112.7(8)  | C36-C35-H35A  | 109.5    |
| C15-C14-H14A  | 109.1     | C36-C35-H35B  | 109.5    |
| C15-C14-H14B  | 109.1     | C35-C36-H36A  | 109.2    |
| C14-C15-H15A  | 109.3     | C35-C36-H36B  | 109.2    |
| C14-C15-H15B  | 109.3     | C35-C36-C37   | 112.0(8) |
| C14-C15-C16   | 111.8(8)  | H36A-C36-H36B | 107.9    |
| H15A-C15-H15B | 107.9     | C37-C36-H36A  | 109.2    |
| C16-C15-H15A  | 109.3     | C37-C36-H36B  | 109.2    |
| C16-C15-H15B  | 109.3     | C36-C37-H37A  | 109.6    |
| C11-C16-C15   | 108.9(7)  | C36-C37-H37B  | 109.6    |
| C11-C16-H16A  | 109.9     | C36-C37-C38   | 110.2(8) |
| C11-C16-H16B  | 109.9     | H37A-C37-H37B | 108.1    |
| C15-C16-H16A  | 109.9     | C38-C37-H37A  | 109.6    |
| C15-C16-H16B  | 109.9     | C38-C37-H37B  | 109.6    |
| H16A-C16-H16B | 108.3     | C33-C38-C37   | 109.2(6) |
| S3-C23-H23A   | 109.1     | C33-C38-H38A  | 109.8    |
| S3-C23-H23B   | 109.1     | C33-C38-H38B  | 109.8    |
| H23A-C23-H23B | 107.8     | C37-C38-H38A  | 109.8    |
| C24-C23-S3    | 112.4(5)  | C37-C38-H38B  | 109.8    |
| C24-C23-H23A  | 109.1     | H38A-C38-H38B | 108.3    |
| C24-C23-H23B  | 109.1     | S5-C39-H39A   | 109.6    |
| C25-C24-C23   | 176.1(7)  | S5-C39-H39B   | 109.6    |
| C24-C25-C26   | 177.2(7)  | H39A-C39-H39B | 108.1    |
| S4-C26-H26A   | 108.8     | C40-C39-S5    | 110.5(5) |
| S4-C26-H26B   | 108.8     | C40-C39-H39A  | 109.6    |
| C25-C26-S4    | 113.6(5)  | C40-C39-H39B  | 109.6    |
| C25-C26-H26A  | 108.8     | C41-C40-C39   | 174.9(9) |
| C25-C26-H26B  | 108.8     | C40-C41-C42   | 175.8(9) |
| H26A-C26-H26B | 107.7     | S6-C42-H42A   | 109.2    |
| S4-C27-H27    | 105.3     | S6-C42-H42B   | 109.2    |
| S4-C27-H27A   | 100.8     | C41-C42-S6    | 112.0(5) |
| C28A-C27-S4   | 116.5(7)  | C41-C42-H42A  | 109.2    |
| C28A-C27-H27  | 105.3     | C41-C42-H42B  | 109.2    |
| C28A-C27-C32A | 112.2(8)  | H42A-C42-H42B | 107.9    |
| C32A-C27-S4   | 111.2(7)  | S6-C43-H43    | 106.0    |
| C32A-C27-H27  | 105.3     | C44-C43-S6    | 112.1(6) |
| C28B-C27-S4   | 104.0(12) | C44-C43-H43   | 106.0    |
| C28B-C27-H27A | 100.8     | C48-C43-S6    | 114.5(5) |
| C32B-C27-S4   | 125.0(11) | C48-C43-H43   | 106.0    |
| C32B-C27-H27A | 100.8     | C48-C43-C44   | 111.4(7) |
| C32B-C27-C28B | 120.5(16) | C43-C44-H44A  | 109.7    |
| S5-C33-H33    | 107.7     | C43-C44-H44B  | 109.7    |
| C34-C33-S5    | 108.5(4)  | C43-C44-C45   | 109.8(8) |
| C34-C33-H33   | 107.7     | H44A-C44-H44B | 108.2    |
| C38-C33-S5    | 112.8(4)  | C45-C44-H44A  | 109.7    |
| C38-C33-H33   | 107.7     | C45-C44-H44B  | 109.7    |
| C38-C33-C34   | 112.1(6)  | C44-C45-H45A  | 109.3    |
| C33-C34-H34A  | 109.7     | C44-C45-H45B  | 109.3    |
| C33-C34-H34B  | 109.7     | H45A-C45-H45B | 108.0    |

|               |           |                |           |
|---------------|-----------|----------------|-----------|
| C46-C45-C44   | 111.6(8)  | C5A-C4A-H4AA   | 109.5     |
| C46-C45-H45A  | 109.3     | C5A-C4A-H4AB   | 109.5     |
| C46-C45-H45B  | 109.3     | C4A-C5A-H5AA   | 109.0     |
| C45-C46-H46A  | 109.3     | C4A-C5A-H5AB   | 109.0     |
| C45-C46-H46B  | 109.3     | C4A-C5A-C6A    | 112.9(10) |
| H46A-C46-H46B | 107.9     | H5AA-C5A-H5AB  | 107.8     |
| C47-C46-C45   | 111.8(7)  | C6A-C5A-H5AA   | 109.0     |
| C47-C46-H46A  | 109.3     | C6A-C5A-H5AB   | 109.0     |
| C47-C46-H46B  | 109.3     | C1A-C6A-C5A    | 111.2(11) |
| C46-C47-H47A  | 109.8     | C1A-C6A-H6AA   | 109.4     |
| C46-C47-H47B  | 109.8     | C1A-C6A-H6AB   | 109.4     |
| C46-C47-C48   | 109.2(8)  | C5A-C6A-H6AA   | 109.4     |
| H47A-C47-H47B | 108.3     | C5A-C6A-H6AB   | 109.4     |
| C48-C47-H47A  | 109.8     | H6AA-C6A-H6AB  | 108.0     |
| C48-C47-H47B  | 109.8     | S3-C17A-H17A   | 108.1     |
| C43-C48-C47   | 112.2(6)  | C18A-C17A-S3   | 115.2(6)  |
| C43-C48-H48A  | 109.2     | C18A-C17A-H17A | 108.1     |
| C43-C48-H48B  | 109.2     | C22A-C17A-S3   | 106.3(8)  |
| C47-C48-H48A  | 109.2     | C22A-C17A-H17A | 108.1     |
| C47-C48-H48B  | 109.2     | C22A-C17A-C18A | 110.7(9)  |
| H48A-C48-H48B | 107.9     | C17A-C18A-H18A | 109.4     |
| S7-C55-H55A   | 108.8     | C17A-C18A-H18B | 109.4     |
| S7-C55-H55B   | 108.8     | H18A-C18A-H18B | 108.0     |
| H55A-C55-H55B | 107.7     | C19A-C18A-C17A | 111.3(8)  |
| C56-C55-S7    | 113.7(5)  | C19A-C18A-H18A | 109.4     |
| C56-C55-H55A  | 108.8     | C19A-C18A-H18B | 109.4     |
| C56-C55-H55B  | 108.8     | C18A-C19A-H19A | 109.3     |
| C57-C56-C55   | 176.5(7)  | C18A-C19A-H19B | 109.3     |
| C56-C57-C58   | 176.9(7)  | H19A-C19A-H19B | 108.0     |
| S8-C58-H58A   | 109.0     | C20A-C19A-C18A | 111.6(11) |
| S8-C58-H58B   | 109.0     | C20A-C19A-H19A | 109.3     |
| C57-C58-S8    | 113.0(5)  | C20A-C19A-H19B | 109.3     |
| C57-C58-H58A  | 109.0     | C19A-C20A-H20A | 109.0     |
| C57-C58-H58B  | 109.0     | C19A-C20A-H20B | 109.0     |
| H58A-C58-H58B | 107.8     | H20A-C20A-H20B | 107.8     |
| S1-C1A-H1A    | 108.9     | C21A-C20A-C19A | 112.9(12) |
| C2A-C1A-S1    | 108.3(6)  | C21A-C20A-H20A | 109.0     |
| C2A-C1A-H1A   | 108.9     | C21A-C20A-H20B | 109.0     |
| C6A-C1A-S1    | 110.2(8)  | C20A-C21A-H21A | 110.0     |
| C6A-C1A-H1A   | 108.9     | C20A-C21A-H21B | 110.0     |
| C6A-C1A-C2A   | 111.7(8)  | C20A-C21A-C22A | 108.6(11) |
| C1A-C2A-H2AA  | 109.6     | H21A-C21A-H21B | 108.3     |
| C1A-C2A-H2AB  | 109.6     | C22A-C21A-H21A | 110.0     |
| H2AA-C2A-H2AB | 108.1     | C22A-C21A-H21B | 110.0     |
| C3A-C2A-C1A   | 110.3(12) | C17A-C22A-C21A | 113.0(10) |
| C3A-C2A-H2AA  | 109.6     | C17A-C22A-H22A | 109.0     |
| C3A-C2A-H2AB  | 109.6     | C17A-C22A-H22B | 109.0     |
| C2A-C3A-H3AA  | 109.2     | C21A-C22A-H22A | 109.0     |
| C2A-C3A-H3AB  | 109.2     | C21A-C22A-H22B | 109.0     |
| C2A-C3A-C4A   | 111.9(15) | H22A-C22A-H22B | 107.8     |
| H3AA-C3A-H3AB | 107.9     | C27-C28A-H28A  | 109.0     |
| C4A-C3A-H3AA  | 109.2     | C27-C28A-H28B  | 109.0     |
| C4A-C3A-H3AB  | 109.2     | C27-C28A-C29A  | 112.9(10) |
| C3A-C4A-H4AA  | 109.5     | H28A-C28A-H28B | 107.8     |
| C3A-C4A-H4AB  | 109.5     | C29A-C28A-H28A | 109.0     |
| H4AA-C4A-H4AB | 108.1     | C29A-C28A-H28B | 109.0     |
| C5A-C4A-C3A   | 110.6(13) | C28A-C29A-H29A | 108.3     |



|                |           |                |           |
|----------------|-----------|----------------|-----------|
| C28A-C29A-H29B | 108.3     | C53A-C54A-H54B | 109.3     |
| H29A-C29A-H29B | 107.4     | H54A-C54A-H54B | 107.9     |
| C30A-C29A-C28A | 116.0(12) | S8-C59A-H59A   | 105.8     |
| C30A-C29A-H29A | 108.3     | C60A-C59A-S8   | 112.4(8)  |
| C30A-C29A-H29B | 108.3     | C60A-C59A-H59A | 105.8     |
| C29A-C30A-H30A | 108.8     | C60A-C59A-C64A | 112.2(9)  |
| C29A-C30A-H30B | 108.8     | C64A-C59A-S8   | 113.8(7)  |
| C29A-C30A-C31A | 113.7(11) | C64A-C59A-H59A | 105.8     |
| H30A-C30A-H30B | 107.7     | C59A-C60A-H60A | 109.6     |
| C31A-C30A-H30A | 108.8     | C59A-C60A-H60B | 109.6     |
| C31A-C30A-H30B | 108.8     | C59A-C60A-C61A | 110.2(10) |
| C30A-C31A-H31A | 109.8     | H60A-C60A-H60B | 108.1     |
| C30A-C31A-H31B | 109.8     | C61A-C60A-H60A | 109.6     |
| H31A-C31A-H31B | 108.2     | C61A-C60A-H60B | 109.6     |
| C32A-C31A-C30A | 109.5(13) | C60A-C61A-H61A | 108.9     |
| C32A-C31A-H31A | 109.8     | C60A-C61A-H61B | 108.9     |
| C32A-C31A-H31B | 109.8     | H61A-C61A-H61B | 107.7     |
| C27-C32A-H32A  | 109.3     | C62A-C61A-C60A | 113.5(11) |
| C27-C32A-H32B  | 109.3     | C62A-C61A-H61A | 108.9     |
| C31A-C32A-C27  | 111.7(12) | C62A-C61A-H61B | 108.9     |
| C31A-C32A-H32A | 109.3     | C61A-C62A-H62A | 108.9     |
| C31A-C32A-H32B | 109.3     | C61A-C62A-H62B | 108.9     |
| H32A-C32A-H32B | 107.9     | C61A-C62A-C63A | 113.5(12) |
| S7-C49A-H49A   | 107.8     | H62A-C62A-H62B | 107.7     |
| C50A-C49A-S7   | 118.3(8)  | C63A-C62A-H62A | 108.9     |
| C50A-C49A-H49A | 107.8     | C63A-C62A-H62B | 108.9     |
| C50A-C49A-C54A | 110.8(12) | C62A-C63A-H63A | 109.3     |
| C54A-C49A-S7   | 104.0(10) | C62A-C63A-H63B | 109.3     |
| C54A-C49A-H49A | 107.8     | C62A-C63A-C64A | 111.4(12) |
| C49A-C50A-H50A | 109.3     | H63A-C63A-H63B | 108.0     |
| C49A-C50A-H50B | 109.3     | C64A-C63A-H63A | 109.3     |
| C49A-C50A-C51A | 111.4(10) | C64A-C63A-H63B | 109.3     |
| H50A-C50A-H50B | 108.0     | C59A-C64A-C63A | 111.4(11) |
| C51A-C50A-H50A | 109.3     | C59A-C64A-H64A | 109.3     |
| C51A-C50A-H50B | 109.3     | C59A-C64A-H64B | 109.3     |
| C50A-C51A-H51A | 109.3     | C63A-C64A-H64A | 109.3     |
| C50A-C51A-H51B | 109.3     | C63A-C64A-H64B | 109.3     |
| H51A-C51A-H51B | 107.9     | H64A-C64A-H64B | 108.0     |
| C52A-C51A-C50A | 111.8(13) | S1-C1B-H1B     | 106.8     |
| C52A-C51A-H51A | 109.3     | C2B-C1B-S1     | 110.7(13) |
| C52A-C51A-H51B | 109.3     | C2B-C1B-H1B    | 106.8     |
| C51A-C52A-H52A | 108.5     | C6B-C1B-S1     | 114.1(13) |
| C51A-C52A-H52B | 108.5     | C6B-C1B-H1B    | 106.8     |
| H52A-C52A-H52B | 107.5     | C6B-C1B-C2B    | 111.2(16) |
| C53A-C52A-C51A | 115.0(12) | C1B-C2B-H2BA   | 108.9     |
| C53A-C52A-H52A | 108.5     | C1B-C2B-H2BB   | 108.9     |
| C53A-C52A-H52B | 108.5     | C1B-C2B-C3B    | 114(2)    |
| C52A-C53A-H53A | 109.6     | H2BA-C2B-H2BB  | 107.7     |
| C52A-C53A-H53B | 109.6     | C3B-C2B-H2BA   | 108.9     |
| C52A-C53A-C54A | 110.4(15) | C3B-C2B-H2BB   | 108.9     |
| H53A-C53A-H53B | 108.1     | C2B-C3B-H3BA   | 109.5     |
| C54A-C53A-H53A | 109.6     | C2B-C3B-H3BB   | 109.5     |
| C54A-C53A-H53B | 109.6     | H3BA-C3B-H3BB  | 108.1     |
| C49A-C54A-C53A | 111.7(14) | C4B-C3B-C2B    | 111(3)    |
| C49A-C54A-H54A | 109.3     | C4B-C3B-H3BA   | 109.5     |
| C49A-C54A-H54B | 109.3     | C4B-C3B-H3BB   | 109.5     |
| C53A-C54A-H54A | 109.3     | C3B-C4B-H4BA   | 109.0     |

|                |           |                |           |
|----------------|-----------|----------------|-----------|
| C3B-C4B-H4BB   | 109.0     | C29B-C28B-H28C | 109.1     |
| H4BA-C4B-H4BB  | 107.8     | C29B-C28B-H28D | 109.1     |
| C5B-C4B-C3B    | 113(3)    | C28B-C29B-H29C | 109.6     |
| C5B-C4B-H4BA   | 109.0     | C28B-C29B-H29D | 109.6     |
| C5B-C4B-H4BB   | 109.0     | H29C-C29B-H29D | 108.1     |
| C4B-C5B-H5BA   | 109.4     | C30B-C29B-C28B | 110(3)    |
| C4B-C5B-H5BB   | 109.4     | C30B-C29B-H29C | 109.6     |
| C4B-C5B-C6B    | 111(2)    | C30B-C29B-H29D | 109.6     |
| H5BA-C5B-H5BB  | 108.0     | C29B-C30B-H30C | 109.2     |
| C6B-C5B-H5BA   | 109.4     | C29B-C30B-H30D | 109.2     |
| C6B-C5B-H5BB   | 109.4     | H30C-C30B-H30D | 107.9     |
| C1B-C6B-C5B    | 113.6(18) | C31B-C30B-C29B | 112(3)    |
| C1B-C6B-H6BA   | 108.9     | C31B-C30B-H30C | 109.2     |
| C1B-C6B-H6BB   | 108.9     | C31B-C30B-H30D | 109.2     |
| C5B-C6B-H6BA   | 108.9     | C30B-C31B-H31C | 110.3     |
| C5B-C6B-H6BB   | 108.9     | C30B-C31B-H31D | 110.3     |
| H6BA-C6B-H6BB  | 107.7     | C30B-C31B-C32B | 107(3)    |
| S3-C17B-H17B   | 107.1     | H31C-C31B-H31D | 108.5     |
| C18B-C17B-S3   | 112.7(15) | C32B-C31B-H31C | 110.3     |
| C18B-C17B-H17B | 107.1     | C32B-C31B-H31D | 110.3     |
| C18B-C17B-C22B | 117.3(16) | C27-C32B-C31B  | 111(2)    |
| C22B-C17B-S3   | 105.0(12) | C27-C32B-H32C  | 109.4     |
| C22B-C17B-H17B | 107.1     | C27-C32B-H32D  | 109.4     |
| C17B-C18B-H18C | 108.8     | C31B-C32B-H32C | 109.4     |
| C17B-C18B-H18D | 108.8     | C31B-C32B-H32D | 109.4     |
| C17B-C18B-C19B | 114(2)    | H32C-C32B-H32D | 108.0     |
| H18C-C18B-H18D | 107.7     | S7-C49B-H49B   | 107.9     |
| C19B-C18B-H18C | 108.8     | C50B-C49B-S7   | 112.2(14) |
| C19B-C18B-H18D | 108.8     | C50B-C49B-H49B | 107.9     |
| C18B-C19B-H19C | 109.2     | C50B-C49B-C54B | 112.6(14) |
| C18B-C19B-H19D | 109.2     | C54B-C49B-S7   | 108.3(11) |
| C18B-C19B-C20B | 112(2)    | C54B-C49B-H49B | 107.9     |
| H19C-C19B-H19D | 107.9     | C49B-C50B-H50C | 109.5     |
| C20B-C19B-H19C | 109.2     | C49B-C50B-H50D | 109.5     |
| C20B-C19B-H19D | 109.2     | C49B-C50B-C51B | 110.6(19) |
| C19B-C20B-H20C | 108.8     | H50C-C50B-H50D | 108.1     |
| C19B-C20B-H20D | 108.8     | C51B-C50B-H50C | 109.5     |
| H20C-C20B-H20D | 107.7     | C51B-C50B-H50D | 109.5     |
| C21B-C20B-C19B | 114(3)    | C50B-C51B-H51C | 110.5     |
| C21B-C20B-H20C | 108.8     | C50B-C51B-H51D | 110.5     |
| C21B-C20B-H20D | 108.8     | C50B-C51B-C52B | 106.2(19) |
| C20B-C21B-H21C | 108.0     | H51C-C51B-H51D | 108.7     |
| C20B-C21B-H21D | 108.0     | C52B-C51B-H51C | 110.5     |
| C20B-C21B-C22B | 117(2)    | C52B-C51B-H51D | 110.5     |
| H21C-C21B-H21D | 107.3     | C51B-C52B-H52C | 110.6     |
| C22B-C21B-H21C | 108.0     | C51B-C52B-H52D | 110.6     |
| C22B-C21B-H21D | 108.0     | H52C-C52B-H52D | 108.8     |
| C17B-C22B-H22C | 110.1     | C53B-C52B-C51B | 105.5(19) |
| C17B-C22B-H22D | 110.1     | C53B-C52B-H52C | 110.6     |
| C21B-C22B-C17B | 107.9(17) | C53B-C52B-H52D | 110.6     |
| C21B-C22B-H22C | 110.1     | C52B-C53B-H53C | 109.0     |
| C21B-C22B-H22D | 110.1     | C52B-C53B-H53D | 109.0     |
| H22C-C22B-H22D | 108.4     | C52B-C53B-C54B | 113.0(18) |
| C27-C28B-H28C  | 109.1     | H53C-C53B-H53D | 107.8     |
| C27-C28B-H28D  | 109.1     | C54B-C53B-H53C | 109.0     |
| H28C-C28B-H28D | 107.9     | C54B-C53B-H53D | 109.0     |
| C29B-C28B-C27  | 112(2)    | C49B-C54B-H54C | 109.7     |

|                |           |                |        |
|----------------|-----------|----------------|--------|
| C49B–C54B–H54D | 109.7     | C62B–C61B–H61D | 109.4  |
| C53B–C54B–C49B | 109.9(13) | C61B–C62B–H62C | 109.2  |
| C53B–C54B–H54C | 109.7     | C61B–C62B–H62D | 109.2  |
| C53B–C54B–H54D | 109.7     | C61B–C62B–C63B | 112(2) |
| H54C–C54B–H54D | 108.2     | H62C–C62B–H62D | 107.9  |
| S8–C59B–H59B   | 109.5     | C63B–C62B–H62C | 109.2  |
| C60B–C59B–S8   | 103.2(14) | C63B–C62B–H62D | 109.2  |
| C60B–C59B–H59B | 109.5     | C62B–C63B–H63C | 110.0  |
| C64B–C59B–S8   | 113.6(18) | C62B–C63B–H63D | 110.0  |
| C64B–C59B–H59B | 109.5     | C62B–C63B–C64B | 108(2) |
| C64B–C59B–C60B | 111(2)    | H63C–C63B–H63D | 108.4  |
| C59B–C60B–H60C | 109.4     | C64B–C63B–H63C | 110.0  |
| C59B–C60B–H60D | 109.4     | C64B–C63B–H63D | 110.0  |
| H60C–C60B–H60D | 108.0     | C59B–C64B–C63B | 114(3) |
| C61B–C60B–C59B | 111.1(19) | C59B–C64B–H64C | 108.7  |
| C61B–C60B–H60C | 109.4     | C59B–C64B–H64D | 108.7  |
| C61B–C60B–H60D | 109.4     | C63B–C64B–H64C | 108.7  |
| C60B–C61B–H61C | 109.4     | C63B–C64B–H64D | 108.7  |
| C60B–C61B–H61D | 109.4     | H64C–C64B–H64D | 107.6  |
| H61C–C61B–H61D | 108.0     |                |        |
| C62B–C61B–C60B | 111(2)    |                |        |
| C62B–C61B–H61C | 109.4     |                |        |

Symmetry transformations used to generate equivalent atoms:  
 #1: -1+X, -1+Y, -1+Z; #2: 1+X, +Y, +Z; #3: -1+X, +Y, +Z; #4:  
 1+X, 1+Y, 1+Z;

**Table S18. Torsion angles for CP1\_250K**

| Atom–Atom–Atom–Atom             | Torsion Angle [°] |                   |            |
|---------------------------------|-------------------|-------------------|------------|
| Cu1–S1–C7–C8                    | -156.1(5)         | S1–C1B–C2B–C3B    | -179(2)    |
| Cu1–S1–C1B–C2B                  | -50.0(16)         | S1–C1B–C6B–C5B    | 178.6(14)  |
| Cu1–S1–C1B–C6B                  | -176.4(12)        | S2–C11–C12–C13    | -178.4(6)  |
| Cu2 <sup>#1</sup> –S8–C58–C57   | 159.3(5)          | S2–C11–C16–C15    | -178.7(7)  |
| Cu2 <sup>#1</sup> –S8–C59A–C60A | 177.0(8)          | S3–C17A–C18A–C19A | -174.7(8)  |
| Cu2 <sup>#1</sup> –S8–C59A–C64A | 47.9(10)          | S3–C17A–C22A–C21A | -179.2(10) |
| Cu2 <sup>#1</sup> –S8–C59B–C60B | -97.3(14)         | S3–C17B–C18B–C19B | 172.6(17)  |
| Cu2 <sup>#1</sup> –S8–C59B–C64B | 23(2)             | S3–C17B–C22B–C21B | -174.5(16) |
| Cu3 <sup>#2</sup> –S2–C10–C9    | 161.0(5)          | S4–C27–C28A–C29A  | -179.7(10) |
| Cu3 <sup>#2</sup> –S2–C11–C12   | -89.6(5)          | S4–C27–C32A–C31A  | -173.5(12) |
| Cu3 <sup>#2</sup> –S2–C11–C16   | 34.9(6)           | S4–C27–C28B–C29B  | 176(2)     |
| Cu4–S3–C23–C24                  | 150.1(5)          | S4–C27–C32B–C31B  | -175.1(17) |
| Cu4–S3–C17A–C18A                | 29.2(9)           | S5–C33–C34–C35    | 177.8(5)   |
| Cu4–S3–C17A–C22A                | -93.9(8)          | S5–C33–C38–C37    | -179.9(7)  |
| Cu5–S5–C33–C34                  | 84.7(5)           | S6–C43–C44–C45    | 174.6(6)   |
| Cu5–S5–C33–C38                  | -40.2(6)          | S6–C43–C48–C47    | -174.5(6)  |
| Cu5–S5–C39–C40                  | -172.1(5)         | S7–C49A–C50A–C51A | 176.3(11)  |
| Cu6–S4–C26–C25                  | -164.8(5)         | S7–C49A–C54A–C53A | 174.9(16)  |
| Cu6–S4–C27–C28A                 | 176.5(8)          | S7–C49B–C50B–C51B | -179.7(15) |
| Cu6–S4–C27–C32A                 | 46.2(10)          | S7–C49B–C54B–C53B | 177.4(12)  |
| Cu6–S4–C27–C28B                 | 101.2(14)         | S8–C59A–C60A–C61A | 178.2(10)  |
| Cu6–S4–C27–C32B                 | -43.2(16)         | S8–C59A–C64A–C63A | -177.2(10) |
| Cu7 <sup>#2</sup> –S6–C42–C41   | 139.4(5)          | S8–C59B–C60B–C61B | 174.8(17)  |
| Cu7 <sup>#2</sup> –S6–C43–C44   | 173.8(5)          | S8–C59B–C64B–C63B | -169.5(18) |
| Cu7 <sup>#2</sup> –S6–C43–C48   | 45.7(6)           | C7–S1–C1B–C2B     | 67.4(15)   |
| Cu8–S7–C55–C56                  | -158.5(5)         | C7–S1–C1B–C6B     | -59.0(15)  |
| Cu8–S7–C49A–C50A                | -31.1(13)         | C10–S2–C11–C12    | 158.2(5)   |
| Cu8–S7–C49A–C54A                | 92.3(14)          | C10–S2–C11–C16    | -77.3(6)   |
| S1–C1A–C2A–C3A                  | 177.1(10)         | C11–S2–C10–C9     | -79.1(6)   |
| S1–C1A–C6A–C5A                  | -173.4(9)         | C11–C12–C13–C14   | -54.4(11)  |
|                                 |                   | C12–C11–C16–C15   | -56.1(9)   |
|                                 |                   | C12–C13–C14–C15   | 54.8(13)   |

|                     |            |                     |           |
|---------------------|------------|---------------------|-----------|
| C13-C14-C15-C16     | -55.3(13)  | C30A-C31A-C32A-C27  | -53(2)    |
| C14-C15-C16-C11     | 55.2(11)   | C32A-C27-C28A-C29A  | -49.9(17) |
| C16-C11-C12-C13     | 56.9(8)    | C49A-S7-C55-C56     | 84.4(6)   |
| C23-S3-C17A-C18A    | -76.4(8)   | C49A-C50A-C51A-C52A | -51.8(19) |
| C23-S3-C17A-C22A    | 160.5(8)   | C50A-C49A-C54A-C53A | -57(2)    |
| C26-S4-C27-C28A     | -76.7(9)   | C50A-C51A-C52A-C53A | 51(3)     |
| C26-S4-C27-C32A     | 153.1(10)  | C51A-C52A-C53A-C54A | -51(3)    |
| C26-S4-C27-C28B     | -151.9(14) | C52A-C53A-C54A-C49A | 54(3)     |
| C26-S4-C27-C32B     | 63.7(16)   | C54A-C49A-C50A-C51A | 56.4(19)  |
| C27-S4-C26-C25      | 81.7(6)    | C59A-S8-C58-C57     | -87.1(6)  |
| C27-C28A-C29A-C30A  | 49(2)      | C59A-C60A-C61A-C62A | 52.2(18)  |
| C27-C28B-C29B-C30B  | 39(4)      | C60A-C59A-C64A-C63A | 53.6(16)  |
| C33-S5-C39-C40      | 68.8(6)    | C60A-C61A-C62A-C63A | -54(2)    |
| C33-C34-C35-C36     | 55.7(10)   | C61A-C62A-C63A-C64A | 54(2)     |
| C34-C33-C38-C37     | 57.2(10)   | C62A-C63A-C64A-C59A | -53(2)    |
| C34-C35-C36-C37     | -57.1(12)  | C64A-C59A-C60A-C61A | -51.9(15) |
| C35-C36-C37-C38     | 57.5(12)   | C1B-S1-C7-C8        | 79.9(8)   |
| C36-C37-C38-C33     | -56.4(12)  | C1B-C2B-C3B-C4B     | 51(4)     |
| C38-C33-C34-C35     | -57.0(8)   | C2B-C1B-C6B-C5B     | 52(2)     |
| C39-S5-C33-C34      | -164.5(5)  | C2B-C3B-C4B-C5B     | -53(4)    |
| C39-S5-C33-C38      | 70.7(6)    | C3B-C4B-C5B-C6B     | 54(3)     |
| C42-S6-C43-C44      | 61.0(7)    | C4B-C5B-C6B-C1B     | -54(3)    |
| C42-S6-C43-C48      | -67.1(6)   | C6B-C1B-C2B-C3B     | -51(3)    |
| C43-S6-C42-C41      | -103.5(6)  | C17B-S3-C23-C24     | -95.3(7)  |
| C43-C44-C45-C46     | 55.5(11)   | C17B-C18B-C19B-C20B | -47(3)    |
| C44-C43-C48-C47     | 57.0(10)   | C18B-C17B-C22B-C21B | -48(3)    |
| C44-C45-C46-C47     | -56.8(13)  | C18B-C19B-C20B-C21B | 46(4)     |
| C45-C46-C47-C48     | 55.5(11)   | C19B-C20B-C21B-C22B | -49(4)    |
| C46-C47-C48-C43     | -56.0(9)   | C20B-C21B-C22B-C17B | 47(3)     |
| C48-C43-C44-C45     | -55.6(10)  | C22B-C17B-C18B-C19B | 50(3)     |
| C55-S7-C49A-C50A    | 71.8(11)   | C28B-C27-C32B-C31B  | 46(3)     |
| C55-S7-C49A-C54A    | -164.8(14) | C28B-C29B-C30B-C31B | -58(5)    |
| C58-S8-C59A-C60A    | 65.1(9)    | C29B-C30B-C31B-C32B | 65(5)     |
| C58-S8-C59A-C64A    | -63.9(10)  | C30B-C31B-C32B-C27  | -58(4)    |
| C58-S8-C59B-C60B    | 157.4(15)  | C32B-C27-C28B-C29B  | -38(3)    |
| C58-S8-C59B-C64B    | -82(2)     | C49B-S7-C55-C56     | 85.4(7)   |
| C1A-S1-C7-C8        | 93.1(6)    | C49B-C50B-C51B-C52B | 61(3)     |
| C1A-C2A-C3A-C4A     | -57.2(18)  | C50B-C49B-C54B-C53B | 53(2)     |
| C2A-C1A-C6A-C5A     | -52.9(14)  | C50B-C51B-C52B-C53B | -63(3)    |
| C2A-C3A-C4A-C5A     | 56(2)      | C51B-C52B-C53B-C54B | 63(2)     |
| C3A-C4A-C5A-C6A     | -54(2)     | C52B-C53B-C54B-C49B | -58(2)    |
| C4A-C5A-C6A-C1A     | 52.5(17)   | C54B-C49B-C50B-C51B | -57(2)    |
| C6A-C1A-C2A-C3A     | 55.6(14)   | C59B-S8-C58-C57     | -79.2(8)  |
| C17A-S3-C23-C24     | -91.4(6)   | C59B-C60B-C61B-C62B | -55(3)    |
| C17A-C18A-C19A-C20A | 54.5(15)   | C60B-C59B-C64B-C63B | -54(3)    |
| C18A-C17A-C22A-C21A | 54.9(15)   | C60B-C61B-C62B-C63B | 58(3)     |
| C18A-C19A-C20A-C21A | -56.7(18)  | C61B-C62B-C63B-C64B | -56(3)    |
| C19A-C20A-C21A-C22A | 55.1(18)   | C62B-C63B-C64B-C59B | 55(3)     |
| C20A-C21A-C22A-C17A | -55.0(17)  | C64B-C59B-C60B-C61B | 53(3)     |
| C22A-C17A-C18A-C19A | -53.9(14)  |                     |           |
| C28A-C27-C32A-C31A  | 54.0(19)   |                     |           |
| C28A-C29A-C30A-C31A | -50(3)     |                     |           |
| C29A-C30A-C31A-C32A | 51(3)      |                     |           |

Symmetry transformations used to generate equivalent atoms:  
#1: 1+X, 1+Y, 1+Z; #2: -1+X, +Y, +Z;

## Crystal structure of CP1\_300K

### Crystal Data and Experimental

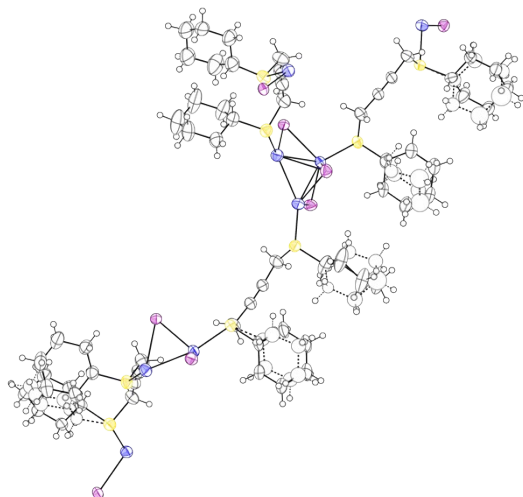

**Experimental:** The data for CP1\_300K were collected from a shock-cooled single crystal at 300.0(1) K on a Bruker D8 VENTURE area detector four-circle diffractometer with a X-ray tube using a graphite as monochromator and a CPAD PHOTON II area detector detector. The diffractometer was equipped with an Oxford Cryostream 800 low temperature device and used Mo  $K_{\alpha}$  radiation ( $\lambda = 0.71073$  Å). All data were integrated with SAINT V8.38A and a multi-scan absorption correction using SADABS 2016/2 was applied.<sup>[1,2]</sup> The structure was solved by direct methods with XT and refined by full-matrix least-squares methods against  $F^2$  using SHELXL.<sup>[3,4]</sup> All non-hydrogen atoms were refined with anisotropic displacement parameters, excepted minor disordered parts. For each compound, some disorders were found in the crystal structure and some geometric parameters of disordered components in each group were restrained by using RIGU or DFIX restraints. For more detail see the .res file included in the cif files. The hydrogen atoms were refined isotropically on calculated positions using a riding model with their  $U_{iso}$  values constrained to 1.5 times the  $U_{eq}$  of their pivot atoms for terminal  $sp^3$  carbon atoms and 1.2 times for all other carbon atoms. Crystallographic data for the structures reported in this paper have been deposited with the Cambridge Crystallographic Data Centre.<sup>[5]</sup> CCDC 2326653 contain the supplementary crystallographic data for this paper. These data can be obtained free of charge from The Cambridge Crystallographic Data Centre via [www.ccdc.cam.ac.uk/structures](http://www.ccdc.cam.ac.uk/structures). This report and the CIF file were generated using FinalCif.<sup>[6]</sup>

Table S19. Crystal data and structure refinement for CP1\_300K

|                                           |                                                                      |
|-------------------------------------------|----------------------------------------------------------------------|
| Internal Reference                        | CP1_300K                                                             |
| CCDC number                               | 2326653                                                              |
| Empirical formula                         | $C_{64}H_{104}Cu_8I_8S_8$                                            |
| Formula weight                            | 2653.47                                                              |
| Temperature [K]                           | 300.0(1)                                                             |
| Crystal system                            | triclinic                                                            |
| Space group (number)                      | $P\bar{1}$ (2)                                                       |
| $a$ [Å]                                   | 11.9606(16)                                                          |
| $b$ [Å]                                   | 19.095(3)                                                            |
| $c$ [Å]                                   | 21.026(3)                                                            |
| $\alpha$ [°]                              | 96.658(4)                                                            |
| $\beta$ [°]                               | 105.219(4)                                                           |
| $\gamma$ [°]                              | 105.342(4)                                                           |
| Volume [Å <sup>3</sup> ]                  | 4378.9(10)                                                           |
| $Z$                                       | 2                                                                    |
| $\rho_{calc}$ [gcm <sup>-3</sup> ]        | 2.012                                                                |
| $\mu$ [mm <sup>-1</sup> ]                 | 4.948                                                                |
| $F(000)$                                  | 2544                                                                 |
| Crystal size [mm <sup>3</sup> ]           | 0.084×0.143×0.168                                                    |
| Crystal colour                            | clear light colourless                                               |
| Crystal shape                             | block                                                                |
| Radiation                                 | Mo $K_{\alpha}$ ( $\lambda=0.71073$ Å)                               |
| $2\theta$ range [°]                       | 2.05 to 50.00 (0.84 Å)                                               |
| Index ranges                              | $-14 \leq h \leq 14$<br>$-22 \leq k \leq 22$<br>$-24 \leq l \leq 24$ |
| Reflections collected                     | 100554                                                               |
| Independent reflections                   | 15416<br>$R_{int} = 0.0941$<br>$R_{sigma} = 0.0442$                  |
| Completeness to $\theta = 24.999^\circ$   | 99.9 %                                                               |
| Data / Restraints / Parameters            | 15416 / 675 / 910                                                    |
| Goodness-of-fit on $F^2$                  | 1.040                                                                |
| Final $R$ indexes [ $I \geq 2\sigma(I)$ ] | $R_1 = 0.0573$<br>$wR_2 = 0.1493$                                    |
| Final $R$ indexes [all data]              | $R_1 = 0.0825$<br>$wR_2 = 0.1673$                                    |
| Largest peak/hole [eÅ <sup>-3</sup> ]     | 2.06/−0.63                                                           |

**Table S20. Bond lengths and angles for CP1\_300K**

| Atom–Atom             | Length [Å] |          |           |
|-----------------------|------------|----------|-----------|
| I1–Cu1                | 2.6345(16) | S5–C17   | 1.810(11) |
| I1–Cu6 <sup>#1</sup>  | 2.6830(15) | S5–C23   | 1.801(12) |
| I1–Cu7 <sup>#1</sup>  | 2.7754(15) | S6–C26   | 1.813(13) |
| I2–Cu2                | 2.6433(15) | S6–C27   | 1.744(13) |
| I2–Cu3                | 2.6908(17) | S7–C49   | 1.822(11) |
| I2–Cu5 <sup>#2</sup>  | 2.7023(15) | S7–C55   | 1.794(12) |
| I3–Cu2                | 2.6962(16) | S8–C58   | 1.791(10) |
| I3–Cu3                | 2.6252(17) | S8–C59   | 1.94(2)   |
| I3–Cu4                | 2.7715(15) | S8–C59A  | 1.73(3)   |
| I4–Cu2                | 2.6953(14) | C1–H1    | 0.9800    |
| I4–Cu4                | 2.6851(15) | C1–C2    | 1.501(5)  |
| I4–Cu5 <sup>#2</sup>  | 2.6997(15) | C1–C6    | 1.501(5)  |
| I5–Cu3 <sup>#3</sup>  | 2.8200(15) | C1A–H1A  | 0.9800    |
| I5–Cu4 <sup>#3</sup>  | 2.6203(15) | C1A–C2A  | 1.500(5)  |
| I5–Cu5                | 2.6153(15) | C1A–C6A  | 1.502(5)  |
| I6–Cu6                | 2.7043(14) | C2–H2A   | 0.9700    |
| I6–Cu7                | 2.6717(15) | C2–H2B   | 0.9700    |
| I6–Cu8 <sup>#3</sup>  | 2.7181(14) | C2–C3    | 1.500(5)  |
| I7–Cu1 <sup>#4</sup>  | 2.6827(16) | C2A–H2AA | 0.9700    |
| I7–Cu6                | 2.6435(15) | C2A–H2AB | 0.9700    |
| I7–Cu8 <sup>#3</sup>  | 2.7404(15) | C2A–C3A  | 1.499(5)  |
| I8–Cu1 <sup>#5</sup>  | 2.7942(15) | C3–H3A   | 0.9700    |
| I8–Cu7 <sup>#2</sup>  | 2.6317(15) | C3–H3B   | 0.9700    |
| I8–Cu8                | 2.5992(14) | C3–C4    | 1.498(5)  |
| Cu1–Cu6 <sup>#1</sup> | 2.7191(17) | C3A–H3AA | 0.9700    |
| Cu1–Cu7 <sup>#1</sup> | 2.7704(19) | C3A–H3AB | 0.9700    |
| Cu1–Cu8 <sup>#6</sup> | 2.8087(18) | C3A–C4A  | 1.500(5)  |
| Cu1–S1                | 2.304(3)   | C4–H4A   | 0.9700    |
| Cu2–Cu3               | 2.7150(17) | C4–H4B   | 0.9700    |
| Cu2–Cu4               | 2.8557(17) | C4–C5    | 1.497(5)  |
| Cu2–Cu5 <sup>#2</sup> | 2.7818(18) | C4A–H4AA | 0.9700    |
| Cu2–S2                | 2.312(3)   | C4A–H4AB | 0.9700    |
| Cu3–Cu4               | 2.7613(18) | C4A–C5A  | 1.500(5)  |
| Cu3–Cu5 <sup>#2</sup> | 2.8127(19) | C5–H5A   | 0.9700    |
| Cu3–S3                | 2.302(3)   | C5–H5B   | 0.9700    |
| Cu4–Cu5 <sup>#2</sup> | 2.674(2)   | C5–C6    | 1.501(5)  |
| Cu4–S5                | 2.291(3)   | C5A–H5AA | 0.9700    |
| Cu5–S6                | 2.295(3)   | C5A–H5AB | 0.9700    |
| Cu6–Cu7               | 2.8489(17) | C5A–C6A  | 1.499(5)  |
| Cu6–Cu8 <sup>#3</sup> | 2.7563(17) | C6–H6A   | 0.9700    |
| Cu6–S4                | 2.313(3)   | C6–H6B   | 0.9700    |
| Cu7–Cu8 <sup>#3</sup> | 2.6377(19) | C6A–H6AA | 0.9700    |
| Cu7–S7                | 2.294(3)   | C6A–H6AB | 0.9700    |
| Cu8–S8                | 2.289(3)   | C7–H7A   | 0.9700    |
| S1–C1                 | 1.856(16)  | C7–H7B   | 0.9700    |
| S1–C1A                | 1.90(4)    | C7–C8    | 1.475(14) |
| S1–C7                 | 1.826(12)  | C8–C9    | 1.172(13) |
| S2–C10                | 1.807(13)  | C9–C10   | 1.450(14) |
| S2–C11                | 1.784(12)  | C10–H10A | 0.9700    |
| S3–C33                | 1.816(12)  | C10–H10B | 0.9700    |
| S3–C39                | 1.812(13)  | C11–H11  | 0.9800    |
| S4–C42                | 1.801(12)  | C11–H11A | 0.9800    |
| S4–C43                | 1.85(2)    | C11–C12  | 1.500(5)  |
| S4–C43A               | 1.80(3)    | C11–C12A | 1.499(5)  |
|                       |            | C11–C16  | 1.493(5)  |

|           |           |           |           |
|-----------|-----------|-----------|-----------|
| C11-C16A  | 1.496(5)  | C28-H28B  | 0.9700    |
| C12-H12A  | 0.9700    | C28-C29   | 1.504(5)  |
| C12-H12B  | 0.9700    | C29-H29A  | 0.9700    |
| C12-C13   | 1.501(5)  | C29-H29B  | 0.9700    |
| C12A-H12C | 0.9700    | C29-C30   | 1.498(5)  |
| C12A-H12D | 0.9700    | C30-H30A  | 0.9700    |
| C12A-C13A | 1.499(5)  | C30-H30B  | 0.9700    |
| C13-H13A  | 0.9700    | C30-C31   | 1.500(5)  |
| C13-H13B  | 0.9700    | C31-H31A  | 0.9700    |
| C13-C14   | 1.499(5)  | C31-H31B  | 0.9700    |
| C13A-H13C | 0.9700    | C31-C32   | 1.502(5)  |
| C13A-H13D | 0.9700    | C32-H32A  | 0.9700    |
| C13A-C14A | 1.500(5)  | C32-H32B  | 0.9700    |
| C14-H14A  | 0.9700    | C33-H33   | 0.9800    |
| C14-H14B  | 0.9700    | C33-H33A  | 0.9800    |
| C14-C15   | 1.496(5)  | C33-C34   | 1.493(5)  |
| C14A-H14C | 0.9700    | C33-C34A  | 1.501(5)  |
| C14A-H14D | 0.9700    | C33-C38   | 1.501(5)  |
| C14A-C15A | 1.499(5)  | C33-C38A  | 1.497(5)  |
| C15-H15A  | 0.9700    | C34-H34A  | 0.9700    |
| C15-H15B  | 0.9700    | C34-H34B  | 0.9700    |
| C15-C16   | 1.499(5)  | C34-C35   | 1.502(5)  |
| C15A-H15C | 0.9700    | C34A-H34C | 0.9700    |
| C15A-H15D | 0.9700    | C34A-H34D | 0.9700    |
| C15A-C16A | 1.501(5)  | C34A-C35A | 1.500(5)  |
| C16-H16A  | 0.9700    | C35-H35A  | 0.9700    |
| C16-H16B  | 0.9700    | C35-H35B  | 0.9700    |
| C16A-H16C | 0.9700    | C35-C36   | 1.499(5)  |
| C16A-H16D | 0.9700    | C35A-H35C | 0.9700    |
| C17-H17   | 0.9800    | C35A-H35D | 0.9700    |
| C17-C18   | 1.500(5)  | C35A-C36A | 1.499(5)  |
| C17-C22   | 1.499(5)  | C36-H36A  | 0.9700    |
| C18-H18A  | 0.9700    | C36-H36B  | 0.9700    |
| C18-H18B  | 0.9700    | C36-C37   | 1.496(5)  |
| C18-C19   | 1.504(5)  | C36A-H36C | 0.9700    |
| C19-H19A  | 0.9700    | C36A-H36D | 0.9700    |
| C19-H19B  | 0.9700    | C36A-C37A | 1.499(5)  |
| C19-C20   | 1.498(5)  | C37-H37A  | 0.9700    |
| C20-H20A  | 0.9700    | C37-H37B  | 0.9700    |
| C20-H20B  | 0.9700    | C37-C38   | 1.502(5)  |
| C20-C21   | 1.498(5)  | C37A-H37C | 0.9700    |
| C21-H21A  | 0.9700    | C37A-H37D | 0.9700    |
| C21-H21B  | 0.9700    | C37A-C38A | 1.500(5)  |
| C21-C22   | 1.500(5)  | C38-H38A  | 0.9700    |
| C22-H22A  | 0.9700    | C38-H38B  | 0.9700    |
| C22-H22B  | 0.9700    | C38A-H38C | 0.9700    |
| C23-H23A  | 0.9700    | C38A-H38D | 0.9700    |
| C23-H23B  | 0.9700    | C39-H39A  | 0.9700    |
| C23-C24   | 1.482(16) | C39-H39B  | 0.9700    |
| C24-C25   | 1.192(15) | C39-C40   | 1.468(14) |
| C25-C26   | 1.442(17) | C40-C41   | 1.165(13) |
| C26-H26A  | 0.9700    | C41-C42   | 1.467(14) |
| C26-H26B  | 0.9700    | C42-H42A  | 0.9700    |
| C27-H27   | 0.9800    | C42-H42B  | 0.9700    |
| C27-C28   | 1.498(5)  | C43-H43   | 0.9800    |
| C27-C32   | 1.495(5)  | C43-C44   | 1.501(5)  |
| C28-H28A  | 0.9700    | C43-C48   | 1.499(5)  |

|           |           |                                         |                  |
|-----------|-----------|-----------------------------------------|------------------|
| C43A–H43A | 0.9800    | C59–C64                                 | 1.501(5)         |
| C43A–C44A | 1.499(5)  | C59A–H59A                               | 0.9800           |
| C43A–C48A | 1.500(5)  | C59A–C60A                               | 1.500(5)         |
| C44–H44A  | 0.9700    | C59A–C64A                               | 1.500(5)         |
| C44–H44B  | 0.9700    | C60–H60A                                | 0.9700           |
| C44–C45   | 1.502(5)  | C60–H60B                                | 0.9700           |
| C44A–H44C | 0.9700    | C60–C61                                 | 1.501(5)         |
| C44A–H44D | 0.9700    | C60A–H60C                               | 0.9700           |
| C44A–C45A | 1.500(5)  | C60A–H60D                               | 0.9700           |
| C45–H45A  | 0.9700    | C60A–C61A                               | 1.501(5)         |
| C45–H45B  | 0.9700    | C61–H61A                                | 0.9700           |
| C45–C46   | 1.498(5)  | C61–H61B                                | 0.9700           |
| C45A–H45C | 0.9700    | C61–C62                                 | 1.499(5)         |
| C45A–H45D | 0.9700    | C61A–H61C                               | 0.9700           |
| C45A–C46A | 1.499(5)  | C61A–H61D                               | 0.9700           |
| C46–H46A  | 0.9700    | C61A–C62A                               | 1.500(5)         |
| C46–H46B  | 0.9700    | C62–H62A                                | 0.9700           |
| C46–C47   | 1.498(5)  | C62–H62B                                | 0.9700           |
| C46A–H46C | 0.9700    | C62–C63                                 | 1.500(5)         |
| C46A–H46D | 0.9700    | C62A–H62C                               | 0.9700           |
| C46A–C47A | 1.499(5)  | C62A–H62D                               | 0.9700           |
| C47–H47A  | 0.9700    | C62A–C63A                               | 1.36(6)          |
| C47–H47B  | 0.9700    | C63–H63A                                | 0.9700           |
| C47–C48   | 1.499(5)  | C63–H63B                                | 0.9700           |
| C47A–H47C | 0.9700    | C63–C64                                 | 1.501(5)         |
| C47A–H47D | 0.9700    | C63A–H63C                               | 0.9700           |
| C47A–C48A | 1.501(5)  | C63A–H63D                               | 0.9700           |
| C48–H48A  | 0.9700    | C63A–C64A                               | 1.500(5)         |
| C48–H48B  | 0.9700    | C64–H64A                                | 0.9700           |
| C48A–H48C | 0.9700    | C64–H64B                                | 0.9700           |
| C48A–H48D | 0.9700    | C64A–H64C                               | 0.9700           |
| C49–H49   | 0.9800    | C64A–H64D                               | 0.9700           |
| C49–C50   | 1.501(5)  |                                         |                  |
| C49–C54   | 1.501(5)  | <b>Atom–Atom–Atom</b>                   | <b>Angle [°]</b> |
| C50–H50A  | 0.9700    | Cu1–I1–Cu6 <sup>#1</sup>                | 61.50(4)         |
| C50–H50B  | 0.9700    | Cu1–I1–Cu7 <sup>#1</sup>                | 61.54(4)         |
| C50–C51   | 1.506(5)  | Cu6 <sup>#1</sup> –I1–Cu7 <sup>#1</sup> | 62.90(4)         |
| C51–H51A  | 0.9700    | Cu2–I2–Cu3                              | 61.19(4)         |
| C51–H51B  | 0.9700    | Cu2–I2–Cu5 <sup>#2</sup>                | 62.71(4)         |
| C51–C52   | 1.498(5)  | Cu3–I2–Cu5 <sup>#2</sup>                | 62.87(4)         |
| C52–H52A  | 0.9700    | Cu2–I3–Cu4                              | 62.95(4)         |
| C52–H52B  | 0.9700    | Cu3–I3–Cu2                              | 61.34(4)         |
| C52–C53   | 1.499(5)  | Cu3–I3–Cu4                              | 61.48(4)         |
| C53–H53A  | 0.9700    | Cu2–I4–Cu5 <sup>#2</sup>                | 62.08(4)         |
| C53–H53B  | 0.9700    | Cu4–I4–Cu2                              | 64.11(4)         |
| C53–C54   | 1.500(5)  | Cu4–I4–Cu5 <sup>#2</sup>                | 59.56(4)         |
| C54–H54A  | 0.9700    | Cu4 <sup>#3</sup> –I5–Cu3 <sup>#3</sup> | 60.87(4)         |
| C54–H54B  | 0.9700    | Cu5–I5–Cu3 <sup>#3</sup>                | 62.19(4)         |
| C55–H55A  | 0.9700    | Cu5–I5–Cu4 <sup>#3</sup>                | 61.44(4)         |
| C55–H55B  | 0.9700    | Cu6–I6–Cu8 <sup>#3</sup>                | 61.10(4)         |
| C55–C56   | 1.493(16) | Cu7–I6–Cu6                              | 64.00(4)         |
| C56–C57   | 1.171(14) | Cu7–I6–Cu8 <sup>#3</sup>                | 58.59(4)         |
| C57–C58   | 1.458(15) | Cu1 <sup>#4</sup> –I7–Cu8 <sup>#3</sup> | 62.37(4)         |
| C58–H58A  | 0.9700    | Cu6–I7–Cu1 <sup>#4</sup>                | 61.39(4)         |
| C58–H58B  | 0.9700    | Cu6–I7–Cu8 <sup>#3</sup>                | 61.56(4)         |
| C59–H59   | 0.9800    | Cu7 <sup>#2</sup> –I8–Cu1 <sup>#5</sup> | 61.32(4)         |
| C59–C60   | 1.500(5)  | Cu8–I8–Cu1 <sup>#5</sup>                | 62.64(4)         |



|                 |            |                 |            |
|-----------------|------------|-----------------|------------|
| Cu8-I8-Cu7#2    | 60.56(4)   | Cu5#2-Cu3-I5#2  | 55.33(4)   |
| I1-Cu1-I7#1     | 113.29(5)  | S3-Cu3-I2       | 110.13(10) |
| I1-Cu1-I8#6     | 113.06(5)  | S3-Cu3-I3       | 116.45(10) |
| I1-Cu1-Cu6#1    | 60.13(4)   | S3-Cu3-I5#2     | 94.43(8)   |
| I1-Cu1-Cu7#1    | 61.73(4)   | S3-Cu3-Cu2      | 157.70(9)  |
| I1-Cu1-Cu8#6    | 107.19(5)  | S3-Cu3-Cu4      | 137.67(9)  |
| I7#1-Cu1-I8#6   | 107.66(5)  | S3-Cu3-Cu5#2    | 133.35(10) |
| I7#1-Cu1-Cu6#1  | 58.60(4)   | I3-Cu4-Cu2      | 57.23(4)   |
| I7#1-Cu1-Cu7#1  | 107.84(5)  | I4-Cu4-I3       | 107.66(5)  |
| I7#1-Cu1-Cu8#6  | 59.82(4)   | I4-Cu4-Cu2      | 58.12(4)   |
| I8#6-Cu1-Cu8#6  | 55.28(4)   | I4-Cu4-Cu3      | 108.26(5)  |
| Cu6#1-Cu1-I8#6  | 107.15(5)  | I5#2-Cu4-I3     | 114.32(5)  |
| Cu6#1-Cu1-Cu7#1 | 62.52(5)   | I5#2-Cu4-I4     | 113.90(6)  |
| Cu6#1-Cu1-Cu8#6 | 59.79(4)   | I5#2-Cu4-Cu2    | 108.77(5)  |
| Cu7#1-Cu1-I8#6  | 56.45(4)   | I5#2-Cu4-Cu3    | 63.14(4)   |
| Cu7#1-Cu1-Cu8#6 | 56.43(5)   | I5#2-Cu4-Cu5#2  | 59.19(4)   |
| S1-Cu1-I1       | 116.27(10) | Cu3-Cu4-I3      | 56.65(4)   |
| S1-Cu1-I7#1     | 110.18(10) | Cu3-Cu4-Cu2     | 57.78(4)   |
| S1-Cu1-I8#6     | 94.70(8)   | Cu5#2-Cu4-I3    | 108.19(5)  |
| S1-Cu1-Cu6#1    | 157.51(9)  | Cu5#2-Cu4-I4    | 60.49(4)   |
| S1-Cu1-Cu7#1    | 137.91(9)  | Cu5#2-Cu4-Cu2   | 60.30(5)   |
| S1-Cu1-Cu8#6    | 134.72(10) | Cu5#2-Cu4-Cu3   | 62.30(5)   |
| I2-Cu2-I3       | 113.27(5)  | S5-Cu4-I3       | 97.72(9)   |
| I2-Cu2-I4       | 112.34(5)  | S5-Cu4-I4       | 110.59(9)  |
| I2-Cu2-Cu3      | 60.27(4)   | S5-Cu4-I5#2     | 111.47(9)  |
| I2-Cu2-Cu4      | 106.24(5)  | S5-Cu4-Cu2      | 138.88(10) |
| I2-Cu2-Cu5#2    | 59.69(4)   | S5-Cu4-Cu3      | 138.64(10) |
| I3-Cu2-Cu3      | 58.04(5)   | S5-Cu4-Cu5#2    | 154.04(10) |
| I3-Cu2-Cu4      | 59.81(4)   | I2#3-Cu5-Cu2#3  | 57.61(4)   |
| I3-Cu2-Cu5#2    | 107.27(5)  | I2#3-Cu5-Cu3#3  | 58.37(4)   |
| I4-Cu2-I3       | 109.59(5)  | I4#3-Cu5-I2#3   | 110.37(5)  |
| I4-Cu2-Cu3      | 109.33(5)  | I4#3-Cu5-Cu2#3  | 58.89(4)   |
| I4-Cu2-Cu4      | 57.77(4)   | I4#3-Cu5-Cu3#3  | 106.38(6)  |
| I4-Cu2-Cu5#2    | 59.04(4)   | I5-Cu5-I2#3     | 113.16(5)  |
| Cu3-Cu2-Cu4     | 59.37(5)   | I5-Cu5-I4#3     | 113.58(6)  |
| Cu3-Cu2-Cu5#2   | 61.54(5)   | I5-Cu5-Cu2#3    | 111.18(6)  |
| Cu5#2-Cu2-Cu4   | 56.62(5)   | I5-Cu5-Cu3#3    | 62.48(4)   |
| S2-Cu2-I2       | 109.71(9)  | I5-Cu5-Cu4#3    | 59.37(4)   |
| S2-Cu2-I3       | 109.36(9)  | Cu2#3-Cu5-Cu3#3 | 58.06(4)   |
| S2-Cu2-I4       | 101.95(8)  | Cu4#3-Cu5-I2#3  | 109.86(6)  |
| S2-Cu2-Cu3      | 148.63(9)  | Cu4#3-Cu5-I4#3  | 59.95(4)   |
| S2-Cu2-Cu4      | 143.55(9)  | Cu4#3-Cu5-Cu2#3 | 63.09(5)   |
| S2-Cu2-Cu5#2    | 142.82(10) | Cu4#3-Cu5-Cu3#3 | 60.37(5)   |
| I2-Cu3-I5#2     | 107.28(5)  | S6-Cu5-I2#3     | 97.47(10)  |
| I2-Cu3-Cu2      | 58.54(4)   | S6-Cu5-I4#3     | 111.86(10) |
| I2-Cu3-Cu4      | 107.62(5)  | S6-Cu5-I5       | 109.32(9)  |
| I2-Cu3-Cu5#2    | 58.77(4)   | S6-Cu5-Cu2#3    | 138.35(10) |
| I3-Cu3-I2       | 114.04(5)  | S6-Cu5-Cu3#3    | 140.28(10) |
| I3-Cu3-I5#2     | 112.57(5)  | S6-Cu5-Cu4#3    | 152.66(11) |
| I3-Cu3-Cu2      | 60.62(4)   | I1#4-Cu6-I6     | 108.83(5)  |
| I3-Cu3-Cu4      | 61.87(5)   | I1#4-Cu6-Cu1#4  | 58.38(4)   |
| I3-Cu3-Cu5#2    | 108.38(5)  | I1#4-Cu6-Cu7    | 60.14(4)   |
| Cu2-Cu3-I5#2    | 107.14(5)  | I1#4-Cu6-Cu8#3  | 107.34(5)  |
| Cu2-Cu3-Cu4     | 62.85(5)   | I6-Cu6-Cu1#4    | 109.93(5)  |
| Cu2-Cu3-Cu5#2   | 60.40(5)   | I6-Cu6-Cu7      | 57.45(4)   |
| Cu4-Cu3-I5#2    | 55.99(4)   | I6-Cu6-Cu8#3    | 59.70(4)   |
| Cu4-Cu3-Cu5#2   | 57.33(5)   | I7-Cu6-I1#4     | 112.99(5)  |

|                                          |            |               |           |
|------------------------------------------|------------|---------------|-----------|
| I7-Cu6-I6                                | 114.44(5)  | C7-S1-Cu1     | 102.6(4)  |
| I7-Cu6-Cu1 <sup>#4</sup>                 | 60.01(4)   | C7-S1-C1      | 93.0(7)   |
| I7-Cu6-Cu7                               | 106.67(5)  | C7-S1-C1A     | 118.7(12) |
| I7-Cu6-Cu8 <sup>#3</sup>                 | 60.95(4)   | C10-S2-Cu2    | 102.1(4)  |
| Cu1 <sup>#4</sup> -Cu6-Cu7               | 59.62(5)   | C11-S2-Cu2    | 110.0(4)  |
| Cu1 <sup>#4</sup> -Cu6-Cu8 <sup>#3</sup> | 61.72(5)   | C11-S2-C10    | 101.3(7)  |
| Cu8 <sup>#3</sup> -Cu6-Cu7               | 56.12(5)   | C33-S3-Cu3    | 114.0(5)  |
| S4-Cu6-I1 <sup>#4</sup>                  | 113.94(9)  | C39-S3-Cu3    | 100.8(4)  |
| S4-Cu6-I6                                | 100.71(8)  | C39-S3-C33    | 98.5(7)   |
| S4-Cu6-I7                                | 105.37(9)  | C42-S4-Cu6    | 103.2(4)  |
| S4-Cu6-Cu1 <sup>#4</sup>                 | 149.28(9)  | C42-S4-C43    | 110.7(10) |
| S4-Cu6-Cu7                               | 146.73(9)  | C42-S4-C43A   | 93.1(10)  |
| S4-Cu6-Cu8 <sup>#3</sup>                 | 138.38(9)  | C43-S4-Cu6    | 107.0(5)  |
| I1 <sup>#4</sup> -Cu7-Cu6                | 56.97(4)   | C43A-S4-Cu6   | 120.8(11) |
| I6-Cu7-I1 <sup>#4</sup>                  | 107.07(5)  | C17-S5-Cu4    | 116.0(4)  |
| I6-Cu7-Cu1 <sup>#4</sup>                 | 109.36(5)  | C23-S5-Cu4    | 103.6(4)  |
| I6-Cu7-Cu6                               | 58.56(4)   | C23-S5-C17    | 101.4(6)  |
| I8 <sup>#3</sup> -Cu7-I1 <sup>#4</sup>   | 113.76(5)  | C26-S6-Cu5    | 103.3(5)  |
| I8 <sup>#3</sup> -Cu7-I6                 | 115.19(5)  | C27-S6-Cu5    | 111.3(4)  |
| I8 <sup>#3</sup> -Cu7-Cu1 <sup>#4</sup>  | 62.23(4)   | C27-S6-C26    | 108.9(7)  |
| I8 <sup>#3</sup> -Cu7-Cu6                | 108.03(5)  | C49-S7-Cu7    | 115.5(4)  |
| I8 <sup>#3</sup> -Cu7-Cu8 <sup>#3</sup>  | 59.11(4)   | C55-S7-Cu7    | 103.9(4)  |
| Cu1 <sup>#4</sup> -Cu7-I1 <sup>#4</sup>  | 56.73(4)   | C55-S7-C49    | 100.9(6)  |
| Cu1 <sup>#4</sup> -Cu7-Cu6               | 57.86(4)   | C58-S8-Cu8    | 100.5(4)  |
| Cu8 <sup>#3</sup> -Cu7-I1 <sup>#4</sup>  | 108.08(5)  | C58-S8-C59    | 93.5(6)   |
| Cu8 <sup>#3</sup> -Cu7-I6                | 61.58(4)   | C59-S8-Cu8    | 109.2(5)  |
| Cu8 <sup>#3</sup> -Cu7-Cu1 <sup>#4</sup> | 62.52(5)   | C59A-S8-Cu8   | 113.0(8)  |
| Cu8 <sup>#3</sup> -Cu7-Cu6               | 60.17(5)   | C59A-S8-C58   | 118.9(11) |
| S7-Cu7-I1 <sup>#4</sup>                  | 98.19(9)   | S1-C1-H1      | 107.2     |
| S7-Cu7-I6                                | 112.62(10) | C2-C1-S1      | 107.1(12) |
| S7-Cu7-I8 <sup>#3</sup>                  | 108.79(9)  | C2-C1-H1      | 107.2     |
| S7-Cu7-Cu1 <sup>#4</sup>                 | 136.08(10) | C2-C1-C6      | 111.8(15) |
| S7-Cu7-Cu6                               | 141.74(10) | C6-C1-S1      | 115.8(10) |
| S7-Cu7-Cu8 <sup>#3</sup>                 | 153.68(10) | C6-C1-H1      | 107.2     |
| I6 <sup>#2</sup> -Cu8-I7 <sup>#2</sup>   | 110.92(5)  | S1-C1A-H1A    | 108.3     |
| I6 <sup>#2</sup> -Cu8-Cu1 <sup>#5</sup>  | 106.92(5)  | C2A-C1A-S1    | 111(2)    |
| I6 <sup>#2</sup> -Cu8-Cu6 <sup>#2</sup>  | 59.20(4)   | C2A-C1A-H1A   | 108.3     |
| I7 <sup>#2</sup> -Cu8-Cu1 <sup>#5</sup>  | 57.80(4)   | C2A-C1A-C6A   | 116(3)    |
| I7 <sup>#2</sup> -Cu8-Cu6 <sup>#2</sup>  | 57.49(4)   | C6A-C1A-S1    | 104(2)    |
| I8-Cu8-I6 <sup>#2</sup>                  | 114.70(5)  | C6A-C1A-H1A   | 108.3     |
| I8-Cu8-I7 <sup>#2</sup>                  | 111.78(5)  | C1-C2-H2A     | 108.7     |
| I8-Cu8-Cu1 <sup>#5</sup>                 | 62.08(4)   | C1-C2-H2B     | 108.7     |
| I8-Cu8-Cu6 <sup>#2</sup>                 | 111.84(5)  | H2A-C2-H2B    | 107.6     |
| I8-Cu8-Cu7 <sup>#2</sup>                 | 60.33(4)   | C3-C2-C1      | 114.3(15) |
| Cu6 <sup>#2</sup> -Cu8-Cu1 <sup>#5</sup> | 58.49(4)   | C3-C2-H2A     | 108.7     |
| Cu7 <sup>#2</sup> -Cu8-I6 <sup>#2</sup>  | 59.83(4)   | C3-C2-H2B     | 108.7     |
| Cu7 <sup>#2</sup> -Cu8-I7 <sup>#2</sup>  | 110.06(5)  | C1A-C2A-H2AA  | 109.2     |
| Cu7 <sup>#2</sup> -Cu8-Cu1 <sup>#5</sup> | 61.06(5)   | C1A-C2A-H2AB  | 109.2     |
| Cu7 <sup>#2</sup> -Cu8-Cu6 <sup>#2</sup> | 63.72(5)   | C1A-C2A-C3A   | 112(3)    |
| S8-Cu8-I6 <sup>#2</sup>                  | 108.56(9)  | H2AA-C2A-H2AB | 107.9     |
| S8-Cu8-I7 <sup>#2</sup>                  | 96.52(9)   | C3A-C2A-H2AA  | 109.2     |
| S8-Cu8-I8                                | 112.90(8)  | C3A-C2A-H2AB  | 109.2     |
| S8-Cu8-Cu1 <sup>#5</sup>                 | 142.00(10) | C2-C3-H3A     | 109.6     |
| S8-Cu8-Cu6 <sup>#2</sup>                 | 134.20(9)  | C2-C3-H3B     | 109.6     |
| S8-Cu8-Cu7 <sup>#2</sup>                 | 153.27(10) | H3A-C3-H3B    | 108.1     |
| C1-S1-Cu1                                | 116.1(5)   | C4-C3-C2      | 110.4(17) |
| C1A-S1-Cu1                               | 105.8(7)   | C4-C3-H3A     | 109.6     |

|               |           |                |           |
|---------------|-----------|----------------|-----------|
| C4-C3-H3B     | 109.6     | S2-C11-H11     | 104.4     |
| C2A-C3A-H3AA  | 110.8     | S2-C11-H11A    | 98.5      |
| C2A-C3A-H3AB  | 110.8     | C12-C11-S2     | 115.1(10) |
| C2A-C3A-C4A   | 105(4)    | C12-C11-H11    | 104.4     |
| H3AA-C3A-H3AB | 108.9     | C12A-C11-S2    | 104.9(16) |
| C4A-C3A-H3AA  | 110.8     | C12A-C11-H11A  | 98.5      |
| C4A-C3A-H3AB  | 110.8     | C16-C11-S2     | 116.1(10) |
| C3-C4-H4A     | 108.6     | C16-C11-H11    | 104.4     |
| C3-C4-H4B     | 108.6     | C16-C11-C12    | 110.9(14) |
| H4A-C4-H4B    | 107.6     | C16A-C11-S2    | 124.9(15) |
| C5-C4-C3      | 114.7(17) | C16A-C11-H11A  | 98.5      |
| C5-C4-H4A     | 108.6     | C16A-C11-C12A  | 124(2)    |
| C5-C4-H4B     | 108.6     | C11-C12-H12A   | 108.8     |
| C3A-C4A-H4AA  | 107.2     | C11-C12-H12B   | 108.8     |
| C3A-C4A-H4AB  | 107.2     | C11-C12-C13    | 113.8(17) |
| H4AA-C4A-H4AB | 106.8     | H12A-C12-H12B  | 107.7     |
| C5A-C4A-C3A   | 121(5)    | C13-C12-H12A   | 108.8     |
| C5A-C4A-H4AA  | 107.2     | C13-C12-H12B   | 108.8     |
| C5A-C4A-H4AB  | 107.2     | C11-C12A-H12C  | 109.4     |
| C4-C5-H5A     | 108.5     | C11-C12A-H12D  | 109.4     |
| C4-C5-H5B     | 108.5     | C11-C12A-C13A  | 111(3)    |
| C4-C5-C6      | 115.0(16) | H12C-C12A-H12D | 108.0     |
| H5A-C5-H5B    | 107.5     | C13A-C12A-H12C | 109.4     |
| C6-C5-H5A     | 108.5     | C13A-C12A-H12D | 109.4     |
| C6-C5-H5B     | 108.5     | C12-C13-H13A   | 110.5     |
| C4A-C5A-H5AA  | 108.3     | C12-C13-H13B   | 110.5     |
| C4A-C5A-H5AB  | 108.3     | H13A-C13-H13B  | 108.7     |
| H5AA-C5A-H5AB | 107.4     | C14-C13-C12    | 106.1(16) |
| C6A-C5A-C4A   | 116(5)    | C14-C13-H13A   | 110.5     |
| C6A-C5A-H5AA  | 108.3     | C14-C13-H13B   | 110.5     |
| C6A-C5A-H5AB  | 108.3     | C12A-C13A-H13C | 108.6     |
| C1-C6-H6A     | 109.5     | C12A-C13A-H13D | 108.6     |
| C1-C6-H6B     | 109.5     | C12A-C13A-C14A | 114(4)    |
| C5-C6-C1      | 110.7(14) | H13C-C13A-H13D | 107.6     |
| C5-C6-H6A     | 109.5     | C14A-C13A-H13C | 108.6     |
| C5-C6-H6B     | 109.5     | C14A-C13A-H13D | 108.6     |
| H6A-C6-H6B    | 108.1     | C13-C14-H14A   | 109.2     |
| C1A-C6A-H6AA  | 110.0     | C13-C14-H14B   | 109.2     |
| C1A-C6A-H6AB  | 110.0     | H14A-C14-H14B  | 107.9     |
| C5A-C6A-C1A   | 108(3)    | C15-C14-C13    | 112(2)    |
| C5A-C6A-H6AA  | 110.0     | C15-C14-H14A   | 109.2     |
| C5A-C6A-H6AB  | 110.0     | C15-C14-H14B   | 109.2     |
| H6AA-C6A-H6AB | 108.4     | C13A-C14A-H14C | 111.7     |
| S1-C7-H7A     | 109.3     | C13A-C14A-H14D | 111.7     |
| S1-C7-H7B     | 109.3     | H14C-C14A-H14D | 109.5     |
| H7A-C7-H7B    | 108.0     | C15A-C14A-C13A | 100(4)    |
| C8-C7-S1      | 111.5(8)  | C15A-C14A-H14C | 111.7     |
| C8-C7-H7A     | 109.3     | C15A-C14A-H14D | 111.7     |
| C8-C7-H7B     | 109.3     | C14-C15-H15A   | 109.3     |
| C9-C8-C7      | 177.4(12) | C14-C15-H15B   | 109.3     |
| C8-C9-C10     | 177.2(12) | C14-C15-C16    | 111.6(19) |
| S2-C10-H10A   | 109.0     | H15A-C15-H15B  | 108.0     |
| S2-C10-H10B   | 109.0     | C16-C15-H15A   | 109.3     |
| C9-C10-S2     | 113.1(9)  | C16-C15-H15B   | 109.3     |
| C9-C10-H10A   | 109.0     | C14A-C15A-H15C | 110.2     |
| C9-C10-H10B   | 109.0     | C14A-C15A-H15D | 110.2     |
| H10A-C10-H10B | 107.8     | C14A-C15A-C16A | 107(5)    |

|                |           |               |           |
|----------------|-----------|---------------|-----------|
| H15C-C15A-H15D | 108.5     | C25-C24-C23   | 175.8(16) |
| C16A-C15A-H15C | 110.2     | C24-C25-C26   | 174.4(16) |
| C16A-C15A-H15D | 110.2     | S6-C26-H26A   | 109.2     |
| C11-C16-C15    | 112.4(14) | S6-C26-H26B   | 109.2     |
| C11-C16-H16A   | 109.1     | C25-C26-S6    | 112.0(9)  |
| C11-C16-H16B   | 109.1     | C25-C26-H26A  | 109.2     |
| C15-C16-H16A   | 109.1     | C25-C26-H26B  | 109.2     |
| C15-C16-H16B   | 109.1     | H26A-C26-H26B | 107.9     |
| H16A-C16-H16B  | 107.9     | S6-C27-H27    | 104.2     |
| C11-C16A-C15A  | 99(3)     | C28-C27-S6    | 115.5(10) |
| C11-C16A-H16C  | 112.0     | C28-C27-H27   | 104.2     |
| C11-C16A-H16D  | 112.0     | C32-C27-S6    | 118.4(9)  |
| C15A-C16A-H16C | 112.0     | C32-C27-H27   | 104.2     |
| C15A-C16A-H16D | 112.0     | C32-C27-C28   | 108.6(12) |
| H16C-C16A-H16D | 109.7     | C27-C28-H28A  | 109.0     |
| S5-C17-H17     | 107.2     | C27-C28-H28B  | 109.0     |
| C18-C17-S5     | 113.1(7)  | C27-C28-C29   | 112.9(13) |
| C18-C17-H17    | 107.2     | H28A-C28-H28B | 107.8     |
| C22-C17-S5     | 108.3(7)  | C29-C28-H28A  | 109.0     |
| C22-C17-H17    | 107.2     | C29-C28-H28B  | 109.0     |
| C22-C17-C18    | 113.5(11) | C28-C29-H29A  | 109.3     |
| C17-C18-H18A   | 109.9     | C28-C29-H29B  | 109.3     |
| C17-C18-H18B   | 109.9     | H29A-C29-H29B | 108.0     |
| C17-C18-C19    | 108.9(10) | C30-C29-C28   | 111.6(14) |
| H18A-C18-H18B  | 108.3     | C30-C29-H29A  | 109.3     |
| C19-C18-H18A   | 109.9     | C30-C29-H29B  | 109.3     |
| C19-C18-H18B   | 109.9     | C29-C30-H30A  | 109.2     |
| C18-C19-H19A   | 109.0     | C29-C30-H30B  | 109.2     |
| C18-C19-H19B   | 109.0     | C29-C30-C31   | 112.0(13) |
| H19A-C19-H19B  | 107.8     | H30A-C30-H30B | 107.9     |
| C20-C19-C18    | 112.9(14) | C31-C30-H30A  | 109.2     |
| C20-C19-H19A   | 109.0     | C31-C30-H30B  | 109.2     |
| C20-C19-H19B   | 109.0     | C30-C31-H31A  | 109.9     |
| C19-C20-H20A   | 109.6     | C30-C31-H31B  | 109.9     |
| C19-C20-H20B   | 109.6     | C30-C31-C32   | 108.8(12) |
| C19-C20-C21    | 110.5(14) | H31A-C31-H31B | 108.3     |
| H20A-C20-H20B  | 108.1     | C32-C31-H31A  | 109.9     |
| C21-C20-H20A   | 109.6     | C32-C31-H31B  | 109.9     |
| C21-C20-H20B   | 109.6     | C27-C32-C31   | 116.6(12) |
| C20-C21-H21A   | 109.1     | C27-C32-H32A  | 108.2     |
| C20-C21-H21B   | 109.1     | C27-C32-H32B  | 108.2     |
| C20-C21-C22    | 112.7(12) | C31-C32-H32A  | 108.2     |
| H21A-C21-H21B  | 107.8     | C31-C32-H32B  | 108.2     |
| C22-C21-H21A   | 109.1     | H32A-C32-H32B | 107.3     |
| C22-C21-H21B   | 109.1     | S3-C33-H33    | 105.2     |
| C17-C22-C21    | 110.5(10) | S3-C33-H33A   | 97.7      |
| C17-C22-H22A   | 109.6     | C34-C33-S3    | 108.2(10) |
| C17-C22-H22B   | 109.6     | C34-C33-H33   | 105.2     |
| C21-C22-H22A   | 109.6     | C34-C33-C38   | 114.4(14) |
| C21-C22-H22B   | 109.6     | C34A-C33-S3   | 118.8(16) |
| H22A-C22-H22B  | 108.1     | C34A-C33-H33A | 97.7      |
| S5-C23-H23A    | 109.6     | C38-C33-S3    | 117.5(8)  |
| S5-C23-H23B    | 109.6     | C38-C33-H33   | 105.2     |
| H23A-C23-H23B  | 108.1     | C38A-C33-S3   | 116.7(11) |
| C24-C23-S5     | 110.4(9)  | C38A-C33-H33A | 97.7      |
| C24-C23-H23A   | 109.6     | C38A-C33-C34A | 119.3(17) |
| C24-C23-H23B   | 109.6     | C33-C34-H34A  | 110.3     |

|                |           |                |           |
|----------------|-----------|----------------|-----------|
| C33-C34-H34B   | 110.3     | C37A-C38A-H38D | 109.0     |
| C33-C34-C35    | 107.0(15) | H38C-C38A-H38D | 107.8     |
| H34A-C34-H34B  | 108.6     | S3-C39-H39A    | 108.9     |
| C35-C34-H34A   | 110.3     | S3-C39-H39B    | 108.9     |
| C35-C34-H34B   | 110.3     | H39A-C39-H39B  | 107.7     |
| C33-C34A-H34C  | 107.2     | C40-C39-S3     | 113.4(9)  |
| C33-C34A-H34D  | 107.2     | C40-C39-H39A   | 108.9     |
| H34C-C34A-H34D | 106.8     | C40-C39-H39B   | 108.9     |
| C35A-C34A-C33  | 120(2)    | C41-C40-C39    | 176.7(12) |
| C35A-C34A-H34C | 107.2     | C40-C41-C42    | 175.5(12) |
| C35A-C34A-H34D | 107.2     | S4-C42-H42A    | 109.1     |
| C34-C35-H35A   | 108.4     | S4-C42-H42B    | 109.1     |
| C34-C35-H35B   | 108.4     | C41-C42-S4     | 112.5(9)  |
| H35A-C35-H35B  | 107.4     | C41-C42-H42A   | 109.1     |
| C36-C35-C34    | 115.7(18) | C41-C42-H42B   | 109.1     |
| C36-C35-H35A   | 108.4     | H42A-C42-H42B  | 107.8     |
| C36-C35-H35B   | 108.4     | S4-C43-H43     | 104.9     |
| C34A-C35A-H35C | 108.2     | C44-C43-S4     | 112.1(14) |
| C34A-C35A-H35D | 108.2     | C44-C43-H43    | 104.9     |
| H35C-C35A-H35D | 107.4     | C48-C43-S4     | 115.3(13) |
| C36A-C35A-C34A | 116(4)    | C48-C43-H43    | 104.9     |
| C36A-C35A-H35C | 108.2     | C48-C43-C44    | 113.4(17) |
| C36A-C35A-H35D | 108.2     | S4-C43A-H43A   | 107.2     |
| C35-C36-H36A   | 107.9     | C44A-C43A-S4   | 114(2)    |
| C35-C36-H36B   | 107.9     | C44A-C43A-H43A | 107.2     |
| H36A-C36-H36B  | 107.2     | C44A-C43A-C48A | 110(3)    |
| C37-C36-C35    | 117.5(17) | C48A-C43A-S4   | 110(2)    |
| C37-C36-H36A   | 107.9     | C48A-C43A-H43A | 107.2     |
| C37-C36-H36B   | 107.9     | C43-C44-H44A   | 109.3     |
| C35A-C36A-H36C | 109.5     | C43-C44-H44B   | 109.3     |
| C35A-C36A-H36D | 109.5     | C43-C44-C45    | 111.7(15) |
| H36C-C36A-H36D | 108.1     | H44A-C44-H44B  | 108.0     |
| C37A-C36A-C35A | 111(4)    | C45-C44-H44A   | 109.3     |
| C37A-C36A-H36C | 109.5     | C45-C44-H44B   | 109.3     |
| C37A-C36A-H36D | 109.5     | C43A-C44A-H44C | 109.2     |
| C36-C37-H37A   | 108.2     | C43A-C44A-H44D | 109.2     |
| C36-C37-H37B   | 108.2     | C43A-C44A-C45A | 112(3)    |
| C36-C37-C38    | 116.2(16) | H44C-C44A-H44D | 107.9     |
| H37A-C37-H37B  | 107.4     | C45A-C44A-H44C | 109.2     |
| C38-C37-H37A   | 108.2     | C45A-C44A-H44D | 109.2     |
| C38-C37-H37B   | 108.2     | C44-C45-H45A   | 109.4     |
| C36A-C37A-H37C | 108.5     | C44-C45-H45B   | 109.4     |
| C36A-C37A-H37D | 108.5     | H45A-C45-H45B  | 108.0     |
| C36A-C37A-C38A | 115(4)    | C46-C45-C44    | 111.1(19) |
| H37C-C37A-H37D | 107.5     | C46-C45-H45A   | 109.4     |
| C38A-C37A-H37C | 108.5     | C46-C45-H45B   | 109.4     |
| C38A-C37A-H37D | 108.5     | C44A-C45A-H45C | 108.2     |
| C33-C38-C37    | 113.0(13) | C44A-C45A-H45D | 108.2     |
| C33-C38-H38A   | 109.0     | H45C-C45A-H45D | 107.3     |
| C33-C38-H38B   | 109.0     | C46A-C45A-C44A | 116(3)    |
| C37-C38-H38A   | 109.0     | C46A-C45A-H45C | 108.2     |
| C37-C38-H38B   | 109.0     | C46A-C45A-H45D | 108.2     |
| H38A-C38-H38B  | 107.8     | C45-C46-H46A   | 109.0     |
| C33-C38A-C37A  | 113(2)    | C45-C46-H46B   | 109.0     |
| C33-C38A-H38C  | 109.0     | C45-C46-C47    | 113(2)    |
| C33-C38A-H38D  | 109.0     | H46A-C46-H46B  | 107.8     |
| C37A-C38A-H38C | 109.0     | C47-C46-H46A   | 109.0     |

|                |           |                |           |
|----------------|-----------|----------------|-----------|
| C47-C46-H46B   | 109.0     | C52-C53-C54    | 112.0(12) |
| C45A-C46A-H46C | 110.1     | H53A-C53-H53B  | 107.9     |
| C45A-C46A-H46D | 110.1     | C54-C53-H53A   | 109.2     |
| H46C-C46A-H46D | 108.4     | C54-C53-H53B   | 109.2     |
| C47A-C46A-C45A | 108(3)    | C49-C54-H54A   | 109.1     |
| C47A-C46A-H46C | 110.1     | C49-C54-H54B   | 109.1     |
| C47A-C46A-H46D | 110.1     | C53-C54-C49    | 112.5(10) |
| C46-C47-H47A   | 109.7     | C53-C54-H54A   | 109.1     |
| C46-C47-H47B   | 109.7     | C53-C54-H54B   | 109.1     |
| C46-C47-C48    | 109.9(18) | H54A-C54-H54B  | 107.8     |
| H47A-C47-H47B  | 108.2     | S7-C55-H55A    | 109.6     |
| C48-C47-H47A   | 109.7     | S7-C55-H55B    | 109.6     |
| C48-C47-H47B   | 109.7     | H55A-C55-H55B  | 108.2     |
| C46A-C47A-H47C | 109.9     | C56-C55-S7     | 110.1(8)  |
| C46A-C47A-H47D | 109.9     | C56-C55-H55A   | 109.6     |
| C46A-C47A-C48A | 109(3)    | C56-C55-H55B   | 109.6     |
| H47C-C47A-H47D | 108.3     | C57-C56-C55    | 172.8(14) |
| C48A-C47A-H47C | 109.9     | C56-C57-C58    | 174.5(13) |
| C48A-C47A-H47D | 109.9     | S8-C58-H58A    | 109.0     |
| C43-C48-C47    | 112.8(19) | S8-C58-H58B    | 109.0     |
| C43-C48-H48A   | 109.0     | C57-C58-S8     | 112.8(8)  |
| C43-C48-H48B   | 109.0     | C57-C58-H58A   | 109.0     |
| C47-C48-H48A   | 109.0     | C57-C58-H58B   | 109.0     |
| C47-C48-H48B   | 109.0     | H58A-C58-H58B  | 107.8     |
| H48A-C48-H48B  | 107.8     | S8-C59-H59     | 108.6     |
| C43A-C48A-C47A | 117(3)    | C60-C59-S8     | 109.5(13) |
| C43A-C48A-H48C | 108.1     | C60-C59-H59    | 108.6     |
| C43A-C48A-H48D | 108.1     | C60-C59-C64    | 113.4(14) |
| C47A-C48A-H48C | 108.1     | C64-C59-S8     | 108.1(12) |
| C47A-C48A-H48D | 108.1     | C64-C59-H59    | 108.6     |
| H48C-C48A-H48D | 107.3     | S8-C59A-H59A   | 106.7     |
| S7-C49-H49     | 107.6     | C60A-C59A-S8   | 112.9(19) |
| C50-C49-S7     | 113.6(7)  | C60A-C59A-H59A | 106.7     |
| C50-C49-H49    | 107.6     | C64A-C59A-S8   | 116.8(18) |
| C54-C49-S7     | 109.0(7)  | C64A-C59A-H59A | 106.7     |
| C54-C49-H49    | 107.6     | C64A-C59A-C60A | 106(2)    |
| C54-C49-C50    | 111.1(10) | C59-C60-H60A   | 109.8     |
| C49-C50-H50A   | 109.2     | C59-C60-H60B   | 109.8     |
| C49-C50-H50B   | 109.2     | C59-C60-C61    | 109.4(16) |
| C49-C50-C51    | 112.0(10) | H60A-C60-H60B  | 108.2     |
| H50A-C50-H50B  | 107.9     | C61-C60-H60A   | 109.8     |
| C51-C50-H50A   | 109.2     | C61-C60-H60B   | 109.8     |
| C51-C50-H50B   | 109.2     | C59A-C60A-H60C | 108.7     |
| C50-C51-H51A   | 109.7     | C59A-C60A-H60D | 108.7     |
| C50-C51-H51B   | 109.7     | C59A-C60A-C61A | 114(3)    |
| H51A-C51-H51B  | 108.2     | H60C-C60A-H60D | 107.6     |
| C52-C51-C50    | 110.0(12) | C61A-C60A-H60C | 108.7     |
| C52-C51-H51A   | 109.7     | C61A-C60A-H60D | 108.7     |
| C52-C51-H51B   | 109.7     | C60-C61-H61A   | 108.0     |
| C51-C52-H52A   | 108.7     | C60-C61-H61B   | 108.0     |
| C51-C52-H52B   | 108.7     | H61A-C61-H61B  | 107.2     |
| C51-C52-C53    | 114.3(14) | C62-C61-C60    | 117.4(18) |
| H52A-C52-H52B  | 107.6     | C62-C61-H61A   | 108.0     |
| C53-C52-H52A   | 108.7     | C62-C61-H61B   | 108.0     |
| C53-C52-H52B   | 108.7     | C60A-C61A-H61C | 109.4     |
| C52-C53-H53A   | 109.2     | C60A-C61A-H61D | 109.4     |
| C52-C53-H53B   | 109.2     | H61C-C61A-H61D | 108.0     |

|                |           |                |           |
|----------------|-----------|----------------|-----------|
| C62A–C61A–C60A | 111(3)    | C62A–C63A–H63C | 109.4     |
| C62A–C61A–H61C | 109.4     | C62A–C63A–H63D | 109.4     |
| C62A–C61A–H61D | 109.4     | C62A–C63A–C64A | 111(3)    |
| C61–C62–H62A   | 109.6     | H63C–C63A–H63D | 108.0     |
| C61–C62–H62B   | 109.6     | C64A–C63A–H63C | 109.4     |
| C61–C62–C63    | 110(2)    | C64A–C63A–H63D | 109.4     |
| H62A–C62–H62B  | 108.1     | C59–C64–H64A   | 109.3     |
| C63–C62–H62A   | 109.6     | C59–C64–H64B   | 109.3     |
| C63–C62–H62B   | 109.6     | C63–C64–C59    | 111.4(19) |
| C61A–C62A–H62C | 108.8     | C63–C64–H64A   | 109.3     |
| C61A–C62A–H62D | 108.8     | C63–C64–H64B   | 109.3     |
| H62C–C62A–H62D | 107.7     | H64A–C64–H64B  | 108.0     |
| C63A–C62A–C61A | 114(4)    | C59A–C64A–H64C | 108.4     |
| C63A–C62A–H62C | 108.8     | C59A–C64A–H64D | 108.4     |
| C63A–C62A–H62D | 108.8     | C63A–C64A–C59A | 115(3)    |
| C62–C63–H63A   | 109.3     | C63A–C64A–H64C | 108.4     |
| C62–C63–H63B   | 109.3     | C63A–C64A–H64D | 108.4     |
| C62–C63–C64    | 111.7(19) | H64C–C64A–H64D | 107.5     |
| H63A–C63–H63B  | 107.9     |                |           |
| C64–C63–H63A   | 109.3     |                |           |
| C64–C63–H63B   | 109.3     |                |           |

Symmetry transformations used to generate equivalent atoms:  
#1: -1+X, -1+Y, -1+Z; #2: 1+X, +Y, +Z; #3: -1+X, +Y, +Z; #4:  
1+X, 1+Y, 1+Z; #5: 2+X, 1+Y, 1+Z; #6: -2+X, -1+Y, -1+Z;

**Table S21. Torsion angles for CP1\_300K**

| <b>Atom–Atom–Atom–Atom</b> | <b>Torsion Angle [°]</b> |                   |            |
|----------------------------|--------------------------|-------------------|------------|
| Cu1–S1–C1–C2               | -94.1(15)                | S1–C1–C6–C5       | -175.3(14) |
| Cu1–S1–C1–C6               | 31.4(16)                 | S1–C1A–C2A–C3A    | -179(3)    |
| Cu1–S1–C7–C8               | 149.4(7)                 | S1–C1A–C6A–C5A    | -172(3)    |
| Cu2–S2–C10–C9              | -164.2(8)                | S2–C11–C12–C13    | -170.2(18) |
| Cu2–S2–C11–C12             | 44.3(18)                 | S2–C11–C12A–C13A  | 180(3)     |
| Cu2–S2–C11–C12A            | 105.8(19)                | S2–C11–C16–C15    | 176.5(17)  |
| Cu2–S2–C11–C16             | 176.3(13)                | S2–C11–C16A–C15A  | -168(2)    |
| Cu2–S2–C11–C16A            | -46(2)                   | S3–C33–C34–C35    | 166.2(16)  |
| Cu3–S3–C33–C34             | 88.1(13)                 | S3–C33–C34A–C35A  | 153(3)     |
| Cu3–S3–C33–C34A            | 3(2)                     | S3–C33–C38–C37    | -178.6(15) |
| Cu3–S3–C33–C38             | -43.2(17)                | S3–C33–C38A–C37A  | -172(2)    |
| Cu3–S3–C33–C38A            | 156.9(15)                | S4–C43–C44–C45    | 177(2)     |
| Cu3–S3–C39–C40             | -157.6(8)                | S4–C43–C48–C47    | -177.3(19) |
| Cu4–S5–C17–C18             | -40.6(11)                | S4–C43A–C44A–C45A | -169(3)    |
| Cu4–S5–C17–C22             | 86.1(9)                  | S4–C43A–C48A–C47A | 177(3)     |
| Cu4–S5–C23–C24             | -171.4(9)                | S5–C17–C18–C19    | 179.0(12)  |
| Cu5–S6–C26–C25             | 142.3(10)                | S5–C17–C22–C21    | 179.1(10)  |
| Cu5–S6–C27–C28             | 174.0(12)                | S6–C27–C28–C29    | 172.3(13)  |
| Cu5–S6–C27–C32             | 42.8(14)                 | S6–C27–C32–C31    | -172.5(11) |
| Cu6–S4–C42–C41             | 162.1(8)                 | S7–C49–C50–C51    | -180.0(11) |
| Cu6–S4–C43–C44             | 176.0(17)                | S7–C49–C54–C53    | 179.8(10)  |
| Cu6–S4–C43–C48             | 44(2)                    | S8–C59–C60–C61    | -171.3(16) |
| Cu6–S4–C43A–C44A           | 32(3)                    | S8–C59–C64–C63    | 177.9(14)  |
| Cu6–S4–C43A–C48A           | -93(3)                   | S8–C59A–C60A–C61A | -180(2)    |
| Cu7–S7–C49–C50             | 34.5(10)                 | S8–C59A–C64A–C63A | 180(2)     |
| Cu7–S7–C49–C54             | -90.0(8)                 | C1–S1–C7–C8       | -93.1(9)   |
| Cu7–S7–C55–C56             | 162.6(8)                 | C1–C2–C3–C4       | -52(3)     |
| Cu8–S8–C58–C57             | -153.3(8)                | C1A–S1–C7–C8      | -94.4(12)  |
| Cu8–S8–C59A–C60A           | -53(3)                   | C1A–C2A–C3A–C4A   | -55(5)     |
| Cu8–S8–C59A–C64A           | -176(2)                  | C2–C1–C6–C5       | -52(2)     |
| S1–C1–C2–C3                | -176.4(18)               | C2–C3–C4–C5       | 47(3)      |
|                            |                          | C2A–C1A–C6A–C5A   | -49(5)     |
|                            |                          | C2A–C3A–C4A–C5A   | 49(7)      |

|                     |            |                     |            |
|---------------------|------------|---------------------|------------|
| C3-C4-C5-C6         | -48(3)     | C36-C37-C38-C33     | -34(3)     |
| C3A-C4A-C5A-C6A     | -43(8)     | C36A-C37A-C38A-C33  | 48(5)      |
| C4-C5-C6-C1         | 49(3)      | C38-C33-C34-C35     | -61(2)     |
| C4A-C5A-C6A-C1A     | 38(6)      | C38A-C33-C34A-C35A  | -1(5)      |
| C6-C1-C2-C3         | 56(3)      | C39-S3-C33-C34      | -165.9(13) |
| C6A-C1A-C2A-C3A     | 62(5)      | C39-S3-C33-C34A     | 109(2)     |
| C7-S1-C1-C2         | 160.3(16)  | C39-S3-C33-C38      | 62.8(16)   |
| C7-S1-C1-C6         | -74.2(15)  | C39-S3-C33-C38A     | -97.2(16)  |
| C10-S2-C11-C12      | 151.8(17)  | C42-S4-C43-C44      | 64(2)      |
| C10-S2-C11-C12A     | -146.8(19) | C42-S4-C43-C48      | -67(2)     |
| C10-S2-C11-C16      | -76.2(15)  | C42-S4-C43A-C44A    | -75(3)     |
| C10-S2-C11-C16A     | 61(2)      | C42-S4-C43A-C48A    | 160(3)     |
| C11-S2-C10-C9       | 82.2(10)   | C43-S4-C42-C41      | -83.7(10)  |
| C11-C12-C13-C14     | -59(3)     | C43-C44-C45-C46     | 52(3)      |
| C11-C12A-C13A-C14A  | 34(5)      | C43A-S4-C42-C41     | -75.3(14)  |
| C12-C11-C16-C15     | -50(3)     | C43A-C44A-C45A-C46A | 51(5)      |
| C12-C13-C14-C15     | 59(4)      | C44-C43-C48-C47     | 52(3)      |
| C12A-C11-C16A-C15A  | 45(4)      | C44-C45-C46-C47     | -56(4)     |
| C12A-C13A-C14A-C15A | -59(6)     | C44A-C43A-C48A-C47A | 50(5)      |
| C13-C14-C15-C16     | -58(4)     | C44A-C45A-C46A-C47A | -56(5)     |
| C13A-C14A-C15A-C16A | 84(6)      | C45-C46-C47-C48     | 56(4)      |
| C14-C15-C16-C11     | 51(3)      | C45A-C46A-C47A-C48A | 56(5)      |
| C14A-C15A-C16A-C11  | -73(4)     | C46-C47-C48-C43     | -53(4)     |
| C16-C11-C12-C13     | 55(3)      | C46A-C47A-C48A-C43A | -57(4)     |
| C16A-C11-C12A-C13A  | -28(4)     | C48-C43-C44-C45     | -51(3)     |
| C17-S5-C23-C24      | 68.0(11)   | C48A-C43A-C44A-C45A | -44(5)     |
| C17-C18-C19-C20     | -56(2)     | C49-S7-C55-C56      | -77.4(10)  |
| C18-C17-C22-C21     | -54.4(16)  | C49-C50-C51-C52     | 55(2)      |
| C18-C19-C20-C21     | 56(2)      | C50-C49-C54-C53     | 53.8(15)   |
| C19-C20-C21-C22     | -54(2)     | C50-C51-C52-C53     | -52(2)     |
| C20-C21-C22-C17     | 53.1(19)   | C51-C52-C53-C54     | 50(2)      |
| C22-C17-C18-C19     | 55.2(18)   | C52-C53-C54-C49     | -50.4(19)  |
| C23-S5-C17-C18      | 70.7(12)   | C54-C49-C50-C51     | -56.6(16)  |
| C23-S5-C17-C22      | -162.5(9)  | C55-S7-C49-C50      | -76.7(10)  |
| C26-S6-C27-C28      | 60.8(15)   | C55-S7-C49-C54      | 158.8(9)   |
| C26-S6-C27-C32      | -70.4(13)  | C58-S8-C59A-C60A    | 65(3)      |
| C27-S6-C26-C25      | -99.3(11)  | C58-S8-C59A-C64A    | -59(3)     |
| C27-C28-C29-C30     | 55(2)      | C59-S8-C58-C57      | 96.4(10)   |
| C28-C27-C32-C31     | 53.3(19)   | C59-C60-C61-C62     | 49(3)      |
| C28-C29-C30-C31     | -56(2)     | C59A-S8-C58-C57     | 82.9(12)   |
| C29-C30-C31-C32     | 53(2)      | C59A-C60A-C61A-C62A | 51(5)      |
| C30-C31-C32-C27     | -54.2(19)  | C60-C59-C64-C63     | 56(3)      |
| C32-C27-C28-C29     | -52(2)     | C60-C61-C62-C63     | -50(3)     |
| C33-S3-C39-C40      | 85.8(10)   | C60A-C59A-C64A-C63A | 52(4)      |
| C33-C34-C35-C36     | 52(3)      | C60A-C61A-C62A-C63A | -54(6)     |
| C33-C34A-C35A-C36A  | -11(6)     | C61-C62-C63-C64     | 52(3)      |
| C34-C33-C38-C37     | 53(2)      | C61A-C62A-C63A-C64A | 55(5)      |
| C34-C35-C36-C37     | -38(4)     | C62-C63-C64-C59     | -56(3)     |
| C34A-C33-C38A-C37A  | -18(4)     | C62A-C63A-C64A-C59A | -57(5)     |
| C34A-C35A-C36A-C37A | 39(7)      | C64-C59-C60-C61     | -50(3)     |
| C35-C36-C37-C38     | 27(4)      | C64A-C59A-C60A-C61A | -50(4)     |
| C35A-C36A-C37A-C38A | -59(7)     |                     |            |



## Crystal structure of CP2D1\_100K

### Crystal Data and Experimental

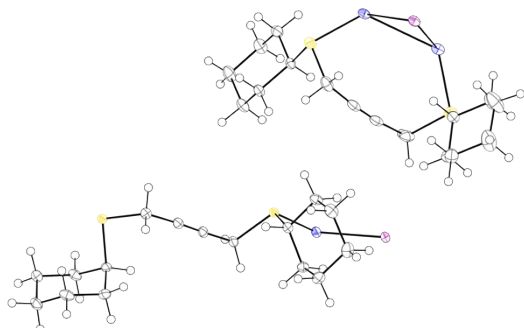

**Experimental:** The data for CP2D1\_100K were collected from a shock-cooled single crystal at 100.0(1) K on a Bruker D8 Venture four-circle diffractometer with a X-ray tube using a graphite as monochromator and a CPAD PHOTON II area detector. The diffractometer was equipped with an Oxford Cryostream 800 low temperature device and used Mo  $K_{\alpha}$  radiation ( $\lambda = 0.71073$  Å). All data were integrated with SAINT V8.38A and a multi-scan absorption correction using SADABS 2016/2 was applied.<sup>[1,2]</sup> The structure was solved by direct methods with XT and refined by full-matrix least-squares methods against  $F^2$  using SHELXL.<sup>[3,4]</sup> All non-hydrogen atoms were refined with anisotropic displacement parameters. The hydrogen atoms were refined isotropically on calculated positions using a riding model with their  $U_{iso}$  values constrained to 1.5 times the  $U_{eq}$  of their pivot atoms for terminal  $sp^3$  carbon atoms and 1.2 times for all other carbon atoms. Crystallographic data for the structures reported in this paper have been deposited with the Cambridge Crystallographic Data Centre.<sup>[5]</sup> CCDC 2326783 contain the supplementary crystallographic data for this paper. These data can be obtained free of charge from The Cambridge Crystallographic Data Centre via [www.ccdc.cam.ac.uk/structures](http://www.ccdc.cam.ac.uk/structures). This report and the CIF file were generated using FinalCif.<sup>[6]</sup>

**Table S22.** Crystal data and structure refinement for CP2D1\_100K

|                                           |                                                                      |
|-------------------------------------------|----------------------------------------------------------------------|
| Internal Reference                        | CP2D1_100K                                                           |
| CCDC number                               | 2326783                                                              |
| Empirical formula                         | $C_{16}H_{26}CuIS_2$                                                 |
| Formula weight                            | 472.93                                                               |
| Temperature [K]                           | 100.0(1)                                                             |
| Crystal system                            | monoclinic                                                           |
| Space group (number)                      | $C2/c$ (15)                                                          |
| $a$ [Å]                                   | 31.839(2)                                                            |
| $b$ [Å]                                   | 10.1369(7)                                                           |
| $c$ [Å]                                   | 22.8562(15)                                                          |
| $\alpha$ [°]                              | 90                                                                   |
| $\beta$ [°]                               | 96.789(2)                                                            |
| $\gamma$ [°]                              | 90                                                                   |
| Volume [Å <sup>3</sup> ]                  | 7325.0(9)                                                            |
| $Z$                                       | 16                                                                   |
| $\rho_{calc}$ [gcm <sup>-3</sup> ]        | 1.715                                                                |
| $\mu$ [mm <sup>-1</sup> ]                 | 3.096                                                                |
| $F(000)$                                  | 3776                                                                 |
| Crystal size [mm <sup>3</sup> ]           | 0.247×0.279×0.481                                                    |
| Crystal colour                            | clear light yellow                                                   |
| Crystal shape                             | block                                                                |
| Radiation                                 | Mo $K_{\alpha}$ ( $\lambda=0.71073$ Å)                               |
| $2\theta$ range [°]                       | 5.64 to 55.00 (0.77 Å)                                               |
| Index ranges                              | $-41 \leq h \leq 41$<br>$-13 \leq k \leq 13$<br>$-29 \leq l \leq 29$ |
| Reflections collected                     | 96786                                                                |
| Independent reflections                   | 8412<br>$R_{int} = 0.0284$<br>$R_{sigma} = 0.0127$                   |
| Completeness to $\theta = 25.242^\circ$   | 99.8 %                                                               |
| Data / Restraints / Parameters            | 8412 / 0 / 362                                                       |
| Goodness-of-fit on $F^2$                  | 1.169                                                                |
| Final $R$ indexes [ $I \geq 2\sigma(I)$ ] | $R_1 = 0.0161$<br>$wR_2 = 0.0388$                                    |
| Final $R$ indexes [all data]              | $R_1 = 0.0163$<br>$wR_2 = 0.0389$                                    |
| Largest peak/hole [eÅ <sup>-3</sup> ]     | 0.88/-0.52                                                           |

**Table S23. Bond lengths and angles for CP2D1\_100K**

| <b>Atom–Atom</b>      | <b>Length [Å]</b> |                                         |                  |
|-----------------------|-------------------|-----------------------------------------|------------------|
| II–Cu1                | 2.6302(3)         | Cu2–S3 <sup>#3</sup>                    | 2.3297(5)        |
| II–Cu1 <sup>#1</sup>  | 2.6631(3)         | Cu3–S4                                  | 2.3482(5)        |
| Cu1–Cu1 <sup>#1</sup> | 2.8535(4)         | Cu3–S4 <sup>#3</sup>                    | 2.3482(5)        |
| Cu1–S1 <sup>#2</sup>  | 2.3424(4)         | S3–C17                                  | 1.8259(16)       |
| Cu1–S2                | 2.3175(4)         | S3–C23                                  | 1.8265(19)       |
| S1–C1                 | 1.8382(16)        | S4–C26                                  | 1.8323(19)       |
| S1–C7                 | 1.8243(16)        | S4–C27                                  | 1.8248(17)       |
| S2–C10                | 1.8209(16)        | C17–H17                                 | 1.0000           |
| S2–C11                | 1.8314(16)        | C17–C18                                 | 1.527(2)         |
| C1–H1                 | 1.0000            | C17–C22                                 | 1.527(2)         |
| C1–C2                 | 1.528(2)          | C18–H18A                                | 0.9900           |
| C1–C6                 | 1.531(2)          | C18–H18B                                | 0.9900           |
| C2–H2A                | 0.9900            | C18–C19                                 | 1.531(2)         |
| C2–H2B                | 0.9900            | C19–H19A                                | 0.9900           |
| C2–C3                 | 1.526(2)          | C19–H19B                                | 0.9900           |
| C3–H3A                | 0.9900            | C19–C20                                 | 1.526(2)         |
| C3–H3B                | 0.9900            | C20–H20A                                | 0.9900           |
| C3–C4                 | 1.525(2)          | C20–H20B                                | 0.9900           |
| C4–H4A                | 0.9900            | C20–C21                                 | 1.523(3)         |
| C4–H4B                | 0.9900            | C21–H21A                                | 0.9900           |
| C4–C5                 | 1.526(2)          | C21–H21B                                | 0.9900           |
| C5–H5A                | 0.9900            | C21–C22                                 | 1.528(2)         |
| C5–H5B                | 0.9900            | C22–H22A                                | 0.9900           |
| C5–C6                 | 1.524(3)          | C22–H22B                                | 0.9900           |
| C6–H6A                | 0.9900            | C23–H23A                                | 0.9900           |
| C6–H6B                | 0.9900            | C23–H23B                                | 0.9900           |
| C7–H7A                | 0.9900            | C23–C24                                 | 1.456(3)         |
| C7–H7B                | 0.9900            | C24–C25                                 | 1.188(3)         |
| C7–C8                 | 1.459(2)          | C25–C26                                 | 1.452(3)         |
| C8–C9                 | 1.194(2)          | C26–H26A                                | 0.9900           |
| C9–C10                | 1.461(2)          | C26–H26B                                | 0.9900           |
| C10–H10A              | 0.9900            | C27–H27                                 | 1.0000           |
| C10–H10B              | 0.9900            | C27–C28                                 | 1.522(2)         |
| C11–H11               | 1.0000            | C27–C32                                 | 1.526(2)         |
| C11–C12               | 1.525(2)          | C28–H28A                                | 0.9900           |
| C11–C16               | 1.528(2)          | C28–H28B                                | 0.9900           |
| C12–H12A              | 0.9900            | C28–C29                                 | 1.532(3)         |
| C12–H12B              | 0.9900            | C29–H29A                                | 0.9900           |
| C12–C13               | 1.530(2)          | C29–H29B                                | 0.9900           |
| C13–H13A              | 0.9900            | C29–C30                                 | 1.519(3)         |
| C13–H13B              | 0.9900            | C30–H30A                                | 0.9900           |
| C13–C14               | 1.524(3)          | C30–H30B                                | 0.9900           |
| C14–H14A              | 0.9900            | C30–C31                                 | 1.520(3)         |
| C14–H14B              | 0.9900            | C31–H31A                                | 0.9900           |
| C14–C15               | 1.528(3)          | C31–H31B                                | 0.9900           |
| C15–H15A              | 0.9900            | C31–C32                                 | 1.524(3)         |
| C15–H15B              | 0.9900            | C32–H32A                                | 0.9900           |
| C15–C16               | 1.532(2)          | C32–H32B                                | 0.9900           |
| C16–H16A              | 0.9900            |                                         |                  |
| C16–H16B              | 0.9900            | <b>Atom–Atom–Atom</b>                   | <b>Angle [°]</b> |
| I2–Cu2                | 2.6289(2)         | Cu1–II–Cu1 <sup>#1</sup>                | 65.240(8)        |
| I2–Cu3                | 2.6421(2)         | II–Cu1–II <sup>#1</sup>                 | 114.759(8)       |
| Cu2–Cu3               | 2.9856(5)         | II <sup>#1</sup> –Cu1–Cu1 <sup>#1</sup> | 56.823(7)        |
| Cu2–S3                | 2.3296(5)         | II–Cu1–Cu1 <sup>#1</sup>                | 57.936(8)        |
|                       |                   | S1 <sup>#2</sup> –Cu1–II                | 102.411(12)      |

|                                         |             |                                        |             |
|-----------------------------------------|-------------|----------------------------------------|-------------|
| S1 <sup>#2</sup> -Cu1-I1 <sup>#1</sup>  | 102.476(13) | S2-C10-H10B                            | 109.2       |
| S1 <sup>#2</sup> -Cu1-Cu1 <sup>#1</sup> | 113.557(14) | C9-C10-S2                              | 112.06(11)  |
| S2-Cu1-I1 <sup>#1</sup>                 | 107.768(12) | C9-C10-H10A                            | 109.2       |
| S2-Cu1-I1                               | 115.632(13) | C9-C10-H10B                            | 109.2       |
| S2-Cu1-Cu1 <sup>#1</sup>                | 133.121(15) | H10A-C10-H10B                          | 107.9       |
| S2-Cu1-S1 <sup>#2</sup>                 | 113.039(15) | S2-C11-H11                             | 108.6       |
| C1-S1-Cu1 <sup>#2</sup>                 | 110.48(5)   | C12-C11-S2                             | 112.05(11)  |
| C7-S1-Cu1 <sup>#2</sup>                 | 104.94(5)   | C12-C11-H11                            | 108.6       |
| C7-S1-C1                                | 100.83(8)   | C12-C11-C16                            | 112.19(13)  |
| C10-S2-Cu1                              | 104.54(5)   | C16-C11-S2                             | 106.81(10)  |
| C10-S2-C11                              | 100.18(7)   | C16-C11-H11                            | 108.6       |
| C11-S2-Cu1                              | 110.90(5)   | C11-C12-H12A                           | 109.3       |
| S1-C1-H1                                | 108.6       | C11-C12-H12B                           | 109.3       |
| C2-C1-S1                                | 108.38(11)  | C11-C12-C13                            | 111.52(13)  |
| C2-C1-H1                                | 108.6       | H12A-C12-H12B                          | 108.0       |
| C2-C1-C6                                | 111.08(13)  | C13-C12-H12A                           | 109.3       |
| C6-C1-S1                                | 111.43(12)  | C13-C12-H12B                           | 109.3       |
| C6-C1-H1                                | 108.6       | C12-C13-H13A                           | 109.4       |
| C1-C2-H2A                               | 109.1       | C12-C13-H13B                           | 109.4       |
| C1-C2-H2B                               | 109.1       | H13A-C13-H13B                          | 108.0       |
| H2A-C2-H2B                              | 107.8       | C14-C13-C12                            | 111.01(14)  |
| C3-C2-C1                                | 112.58(13)  | C14-C13-H13A                           | 109.4       |
| C3-C2-H2A                               | 109.1       | C14-C13-H13B                           | 109.4       |
| C3-C2-H2B                               | 109.1       | C13-C14-H14A                           | 109.5       |
| C2-C3-H3A                               | 109.4       | C13-C14-H14B                           | 109.5       |
| C2-C3-H3B                               | 109.4       | C13-C14-C15                            | 110.59(15)  |
| H3A-C3-H3B                              | 108.0       | H14A-C14-H14B                          | 108.1       |
| C4-C3-C2                                | 111.23(14)  | C15-C14-H14A                           | 109.5       |
| C4-C3-H3A                               | 109.4       | C15-C14-H14B                           | 109.5       |
| C4-C3-H3B                               | 109.4       | C14-C15-H15A                           | 109.4       |
| C3-C4-H4A                               | 109.4       | C14-C15-H15B                           | 109.4       |
| C3-C4-H4B                               | 109.4       | C14-C15-C16                            | 110.97(14)  |
| C3-C4-C5                                | 111.15(14)  | H15A-C15-H15B                          | 108.0       |
| H4A-C4-H4B                              | 108.0       | C16-C15-H15A                           | 109.4       |
| C5-C4-H4A                               | 109.4       | C16-C15-H15B                           | 109.4       |
| C5-C4-H4B                               | 109.4       | C11-C16-C15                            | 110.78(13)  |
| C4-C5-H5A                               | 109.4       | C11-C16-H16A                           | 109.5       |
| C4-C5-H5B                               | 109.4       | C11-C16-H16B                           | 109.5       |
| H5A-C5-H5B                              | 108.0       | C15-C16-H16A                           | 109.5       |
| C6-C5-C4                                | 110.96(14)  | C15-C16-H16B                           | 109.5       |
| C6-C5-H5A                               | 109.4       | H16A-C16-H16B                          | 108.1       |
| C6-C5-H5B                               | 109.4       | Cu2-I2-Cu3                             | 69.001(10)  |
| C1-C6-H6A                               | 109.1       | I2 <sup>#3</sup> -Cu2-I2               | 111.419(13) |
| C1-C6-H6B                               | 109.1       | I2 <sup>#3</sup> -Cu2-Cu3              | 55.709(7)   |
| C5-C6-C1                                | 112.50(14)  | I2-Cu2-Cu3                             | 55.710(7)   |
| C5-C6-H6A                               | 109.1       | S3 <sup>#3</sup> -Cu2-I2 <sup>#3</sup> | 107.551(11) |
| C5-C6-H6B                               | 109.1       | S3-Cu2-I2 <sup>#3</sup>                | 111.408(11) |
| H6A-C6-H6B                              | 107.8       | S3 <sup>#3</sup> -Cu2-I2               | 111.407(11) |
| S1-C7-H7A                               | 109.1       | S3-Cu2-I2                              | 107.554(11) |
| S1-C7-H7B                               | 109.1       | S3 <sup>#3</sup> -Cu2-Cu3              | 126.269(13) |
| H7A-C7-H7B                              | 107.8       | S3-Cu2-Cu3                             | 126.269(13) |
| C8-C7-S1                                | 112.57(11)  | S3-Cu2-S3 <sup>#3</sup>                | 107.46(3)   |
| C8-C7-H7A                               | 109.1       | I2 <sup>#3</sup> -Cu3-I2               | 110.577(13) |
| C8-C7-H7B                               | 109.1       | I2 <sup>#3</sup> -Cu3-Cu2              | 55.287(7)   |
| C9-C8-C7                                | 176.02(17)  | I2-Cu3-Cu2                             | 55.289(6)   |
| C8-C9-C10                               | 178.24(17)  | S4 <sup>#3</sup> -Cu3-I2 <sup>#3</sup> | 110.777(11) |
| S2-C10-H10A                             | 109.2       | S4-Cu3-I2 <sup>#3</sup>                | 107.665(11) |

|                           |             |               |            |
|---------------------------|-------------|---------------|------------|
| S4 <sup>#3</sup> -Cu3-I2  | 107.665(11) | C24-C23-S3    | 112.90(12) |
| S4-Cu3-I2                 | 110.779(11) | C24-C23-H23A  | 109.0      |
| S4-Cu3-Cu2                | 125.305(13) | C24-C23-H23B  | 109.0      |
| S4 <sup>#3</sup> -Cu3-Cu2 | 125.306(13) | C25-C24-C23   | 175.25(18) |
| S4 <sup>#3</sup> -Cu3-S4  | 109.39(3)   | C24-C25-C26   | 173.49(18) |
| C17-S3-Cu2                | 104.25(5)   | S4-C26-H26A   | 109.3      |
| C17-S3-C23                | 102.41(8)   | S4-C26-H26B   | 109.3      |
| C23-S3-Cu2                | 104.37(6)   | C25-C26-S4    | 111.51(12) |
| C26-S4-Cu3                | 105.21(6)   | C25-C26-H26A  | 109.3      |
| C27-S4-Cu3                | 100.94(6)   | C25-C26-H26B  | 109.3      |
| C27-S4-C26                | 102.41(8)   | H26A-C26-H26B | 108.0      |
| S3-C17-H17                | 108.6       | S4-C27-H27    | 108.2      |
| C18-C17-S3                | 106.92(11)  | C28-C27-S4    | 114.64(13) |
| C18-C17-H17               | 108.6       | C28-C27-H27   | 108.2      |
| C22-C17-S3                | 112.71(11)  | C28-C27-C32   | 110.96(15) |
| C22-C17-H17               | 108.6       | C32-C27-S4    | 106.41(12) |
| C22-C17-C18               | 111.23(14)  | C32-C27-H27   | 108.2      |
| C17-C18-H18A              | 109.6       | C27-C28-H28A  | 109.9      |
| C17-C18-H18B              | 109.6       | C27-C28-H28B  | 109.9      |
| C17-C18-C19               | 110.18(14)  | C27-C28-C29   | 109.07(16) |
| H18A-C18-H18B             | 108.1       | H28A-C28-H28B | 108.3      |
| C19-C18-H18A              | 109.6       | C29-C28-H28A  | 109.9      |
| C19-C18-H18B              | 109.6       | C29-C28-H28B  | 109.9      |
| C18-C19-H19A              | 109.4       | C28-C29-H29A  | 109.4      |
| C18-C19-H19B              | 109.4       | C28-C29-H29B  | 109.4      |
| H19A-C19-H19B             | 108.0       | H29A-C29-H29B | 108.0      |
| C20-C19-C18               | 111.34(15)  | C30-C29-C28   | 111.16(16) |
| C20-C19-H19A              | 109.4       | C30-C29-H29A  | 109.4      |
| C20-C19-H19B              | 109.4       | C30-C29-H29B  | 109.4      |
| C19-C20-H20A              | 109.5       | C29-C30-H30A  | 109.5      |
| C19-C20-H20B              | 109.5       | C29-C30-H30B  | 109.5      |
| H20A-C20-H20B             | 108.0       | C29-C30-C31   | 110.74(18) |
| C21-C20-C19               | 110.91(15)  | H30A-C30-H30B | 108.1      |
| C21-C20-H20A              | 109.5       | C31-C30-H30A  | 109.5      |
| C21-C20-H20B              | 109.5       | C31-C30-H30B  | 109.5      |
| C20-C21-H21A              | 109.4       | C30-C31-H31A  | 109.2      |
| C20-C21-H21B              | 109.4       | C30-C31-H31B  | 109.2      |
| C20-C21-C22               | 111.23(15)  | C30-C31-C32   | 112.1(2)   |
| H21A-C21-H21B             | 108.0       | H31A-C31-H31B | 107.9      |
| C22-C21-H21A              | 109.4       | C32-C31-H31A  | 109.2      |
| C22-C21-H21B              | 109.4       | C32-C31-H31B  | 109.2      |
| C17-C22-C21               | 109.91(13)  | C27-C32-H32A  | 109.6      |
| C17-C22-H22A              | 109.7       | C27-C32-H32B  | 109.6      |
| C17-C22-H22B              | 109.7       | C31-C32-C27   | 110.48(16) |
| C21-C22-H22A              | 109.7       | C31-C32-H32A  | 109.6      |
| C21-C22-H22B              | 109.7       | C31-C32-H32B  | 109.6      |
| H22A-C22-H22B             | 108.2       | H32A-C32-H32B | 108.1      |
| S3-C23-H23A               | 109.0       |               |            |
| S3-C23-H23B               | 109.0       |               |            |
| H23A-C23-H23B             | 107.8       |               |            |

Symmetry transformations used to generate equivalent atoms:  
#1: 0.5-X, 1.5-Y, 1-Z; #2: 0.5-X, 0.5-Y, 1-Z; #3: 1-X, +Y, 1.5-Z;

**Table S24. Torsion angles for CP2D1\_100K**

| Atom-Atom-Atom-Atom         | Torsion Angle [°] |                             |             |
|-----------------------------|-------------------|-----------------------------|-------------|
| Cu1 <sup>#1</sup> -S1-C1-C2 | -59.69(11)        | Cu1 <sup>#1</sup> -S1-C7-C8 | -60.57(12)  |
| Cu1 <sup>#1</sup> -S1-C1-C6 | 177.80(10)        | Cu1-S2-C10-C9               | -177.75(10) |
|                             |                   | Cu1-S2-C11-C12              | -40.57(12)  |
|                             |                   | Cu1-S2-C11-C16              | 82.66(11)   |

|                 |             |                 |             |
|-----------------|-------------|-----------------|-------------|
| S1-C1-C2-C3     | -70.43(15)  | Cu3-S4-C27-C32  | -76.63(13)  |
| S1-C1-C6-C5     | 68.20(16)   | S3-C17-C18-C19  | 179.42(12)  |
| S2-C11-C12-C13  | 173.70(11)  | S3-C17-C22-C21  | 177.74(12)  |
| S2-C11-C16-C15  | -177.06(12) | S4-C27-C28-C29  | 179.49(13)  |
| C1-S1-C7-C8     | 54.24(13)   | S4-C27-C32-C31  | 177.61(17)  |
| C1-C2-C3-C4     | -54.29(18)  | C17-S3-C23-C24  | 58.30(14)   |
| C2-C1-C6-C5     | -52.74(19)  | C17-C18-C19-C20 | 55.8(2)     |
| C2-C3-C4-C5     | 55.84(19)   | C18-C17-C22-C21 | 57.67(19)   |
| C3-C4-C5-C6     | -56.17(19)  | C18-C19-C20-C21 | -55.6(2)    |
| C4-C5-C6-C1     | 54.98(19)   | C19-C20-C21-C22 | 56.2(2)     |
| C6-C1-C2-C3     | 52.30(18)   | C20-C21-C22-C17 | -57.00(19)  |
| C7-S1-C1-C2     | -170.27(11) | C22-C17-C18-C19 | -57.14(19)  |
| C7-S1-C1-C6     | 67.22(13)   | C23-S3-C17-C18  | -177.45(12) |
| C10-S2-C11-C12  | 69.40(12)   | C23-S3-C17-C22  | 60.02(14)   |
| C10-S2-C11-C16  | -167.37(11) | C26-S4-C27-C28  | 51.89(15)   |
| C11-S2-C10-C9   | 67.36(12)   | C26-S4-C27-C32  | 174.94(13)  |
| C11-C12-C13-C14 | -54.89(19)  | C27-S4-C26-C25  | 54.25(15)   |
| C12-C11-C16-C15 | -53.92(18)  | C27-C28-C29-C30 | -58.7(2)    |
| C12-C13-C14-C15 | 57.04(19)   | C28-C27-C32-C31 | -57.1(2)    |
| C13-C14-C15-C16 | -57.80(19)  | C28-C29-C30-C31 | 56.5(3)     |
| C14-C15-C16-C11 | 55.92(19)   | C29-C30-C31-C32 | -54.3(3)    |
| C16-C11-C12-C13 | 53.56(18)   | C30-C31-C32-C27 | 54.5(3)     |
| Cu2-S3-C17-C18  | -68.90(11)  | C32-C27-C28-C29 | 58.9(2)     |
| Cu2-S3-C17-C22  | 168.57(11)  |                 |             |
| Cu2-S3-C23-C24  | -50.16(13)  |                 |             |
| Cu3-S4-C26-C25  | -50.90(14)  |                 |             |
| Cu3-S4-C27-C28  | 160.32(12)  |                 |             |

Symmetry transformations used to generate equivalent atoms:  
#1: 0.5-X, 0.5-Y, 1-Z;

## Crystal structure of CP2D1\_140K

### Crystal Data and Experimental

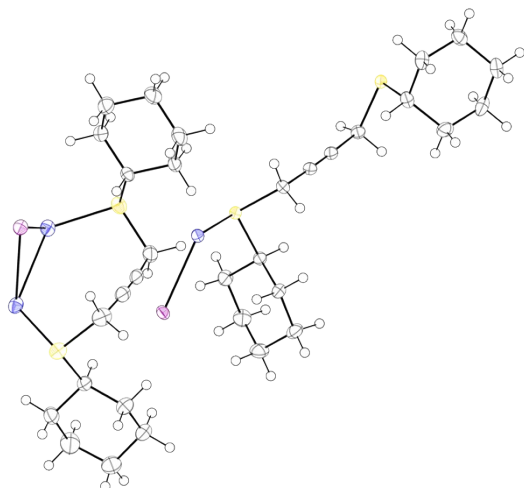

**Experimental:** The data for CP2D1\_140K were collected from a shock-cooled single crystal at 140.0(1) K on a Bruker D8 VENTURE area detector four-circle diffractometer with a X-ray tube using a graphite as monochromator and a CPAD PHOTON II area detector detector. The diffractometer was equipped with an Oxford Cryostream 800 low temperature device and used Mo  $K_{\alpha}$  radiation ( $\lambda = 0.71073 \text{ \AA}$ ). All data were integrated with SAINT V8.38A and a multi-scan absorption correction using SADABS 2016/2 was applied.<sup>[1,2]</sup> The structure was solved by direct methods with XT and refined by full-matrix least-squares methods against  $F^2$  using SHELXL.<sup>[3,4]</sup> All non-hydrogen atoms were refined with anisotropic displacement parameters. The hydrogen atoms were refined isotropically on calculated positions using a riding model with their  $U_{\text{iso}}$  values constrained to 1.5 times the  $U_{\text{eq}}$  of their pivot atoms for terminal  $\text{sp}^3$  carbon atoms and 1.2 times for all other carbon atoms. Crystallographic data for the structures reported in this paper have been deposited with the Cambridge Crystallographic Data Centre.<sup>[5]</sup> CCDC 2326502 contain the supplementary crystallographic data for this paper. These data can be obtained free of charge from The Cambridge Crystallographic Data Centre via [www.ccdc.cam.ac.uk/structures](http://www.ccdc.cam.ac.uk/structures). This report and the CIF file were generated using FinalCif.<sup>[6]</sup>

**Table S25.** Crystal data and structure refinement for CP2D1\_140K

|                                                 |                                                                      |
|-------------------------------------------------|----------------------------------------------------------------------|
| Internal Reference                              | CP2D1_140K                                                           |
| CCDC number                                     | 2326502                                                              |
| Empirical formula                               | $\text{C}_{16}\text{H}_{26}\text{CuIS}_2$                            |
| Formula weight                                  | 472.93                                                               |
| Temperature [K]                                 | 140.0(1)                                                             |
| Crystal system                                  | monoclinic                                                           |
| Space group (number)                            | $C2/c$ (15)                                                          |
| $a$ [ $\text{\AA}$ ]                            | 31.853(2)                                                            |
| $b$ [ $\text{\AA}$ ]                            | 10.1612(6)                                                           |
| $c$ [ $\text{\AA}$ ]                            | 22.9100(14)                                                          |
| $\alpha$ [ $^\circ$ ]                           | 90                                                                   |
| $\beta$ [ $^\circ$ ]                            | 96.804(2)                                                            |
| $\gamma$ [ $^\circ$ ]                           | 90                                                                   |
| Volume [ $\text{\AA}^3$ ]                       | 7363.0(8)                                                            |
| $Z$                                             | 16                                                                   |
| $\rho_{\text{calc}}$ [ $\text{gcm}^{-3}$ ]      | 1.707                                                                |
| $\mu$ [ $\text{mm}^{-1}$ ]                      | 3.080                                                                |
| $F(000)$                                        | 3776                                                                 |
| Crystal size [ $\text{mm}^3$ ]                  | 0.247 $\times$ 0.279 $\times$ 0.481                                  |
| Crystal colour                                  | clear light yellow                                                   |
| Crystal shape                                   | block                                                                |
| Radiation                                       | Mo $K_{\alpha}$ ( $\lambda=0.71073 \text{ \AA}$ )                    |
| $2\theta$ range [ $^\circ$ ]                    | 5.43 to 54.99 (0.77 $\text{\AA}$ )                                   |
| Index ranges                                    | $-41 \leq h \leq 41$<br>$-13 \leq k \leq 13$<br>$-29 \leq l \leq 29$ |
| Reflections collected                           | 85404                                                                |
| Independent reflections                         | 8436<br>$R_{\text{int}} = 0.0248$<br>$R_{\text{sigma}} = 0.0117$     |
| Completeness to $\theta = 25.242^\circ$         | 99.7 %                                                               |
| Data / Restraints / Parameters                  | 8436 / 0 / 362                                                       |
| Goodness-of-fit on $F^2$                        | 1.147                                                                |
| Final $R$ indexes [ $I \geq 2\sigma(I)$ ]       | $R_1 = 0.0162$<br>$wR_2 = 0.0390$                                    |
| Final $R$ indexes [all data]                    | $R_1 = 0.0165$<br>$wR_2 = 0.0391$                                    |
| Largest peak/hole [ $\text{e}\text{\AA}^{-3}$ ] | 0.64/−0.47                                                           |

**Table S26. Bond lengths and angles for CP2D1\_140K**

| <b>Atom–Atom</b>      | <b>Length [Å]</b> |                                         |                  |
|-----------------------|-------------------|-----------------------------------------|------------------|
| II–Cu1                | 2.6310(3)         | Cu2–S3                                  | 2.3312(5)        |
| II–Cu1 <sup>#1</sup>  | 2.6637(3)         | Cu3–S4 <sup>#3</sup>                    | 2.3505(5)        |
| Cu1–Cu1 <sup>#1</sup> | 2.8651(4)         | Cu3–S4                                  | 2.3505(5)        |
| Cu1–S1 <sup>#2</sup>  | 2.3435(4)         | S3–C17                                  | 1.8247(16)       |
| Cu1–S2                | 2.3191(4)         | S3–C23                                  | 1.824(2)         |
| S1–C1                 | 1.8382(16)        | S4–C26                                  | 1.831(2)         |
| S1–C7                 | 1.8236(16)        | S4–C27                                  | 1.8232(17)       |
| S2–C10                | 1.8194(16)        | C17–H17                                 | 1.0000           |
| S2–C11                | 1.8312(15)        | C17–C18                                 | 1.526(2)         |
| C1–H1                 | 1.0000            | C17–C22                                 | 1.524(2)         |
| C1–C2                 | 1.526(2)          | C18–H18A                                | 0.9900           |
| C1–C6                 | 1.529(2)          | C18–H18B                                | 0.9900           |
| C2–H2A                | 0.9900            | C18–C19                                 | 1.529(3)         |
| C2–H2B                | 0.9900            | C19–H19A                                | 0.9900           |
| C2–C3                 | 1.522(2)          | C19–H19B                                | 0.9900           |
| C3–H3A                | 0.9900            | C19–C20                                 | 1.521(3)         |
| C3–H3B                | 0.9900            | C20–H20A                                | 0.9900           |
| C3–C4                 | 1.520(2)          | C20–H20B                                | 0.9900           |
| C4–H4A                | 0.9900            | C20–C21                                 | 1.521(3)         |
| C4–H4B                | 0.9900            | C21–H21A                                | 0.9900           |
| C4–C5                 | 1.523(3)          | C21–H21B                                | 0.9900           |
| C5–H5A                | 0.9900            | C21–C22                                 | 1.526(2)         |
| C5–H5B                | 0.9900            | C22–H22A                                | 0.9900           |
| C5–C6                 | 1.520(3)          | C22–H22B                                | 0.9900           |
| C6–H6A                | 0.9900            | C23–H23A                                | 0.9900           |
| C6–H6B                | 0.9900            | C23–H23B                                | 0.9900           |
| C7–H7A                | 0.9900            | C23–C24                                 | 1.455(3)         |
| C7–H7B                | 0.9900            | C24–C25                                 | 1.187(3)         |
| C7–C8                 | 1.458(2)          | C25–C26                                 | 1.450(3)         |
| C8–C9                 | 1.193(2)          | C26–H26A                                | 0.9900           |
| C9–C10                | 1.461(2)          | C26–H26B                                | 0.9900           |
| C10–H10A              | 0.9900            | C27–H27                                 | 1.0000           |
| C10–H10B              | 0.9900            | C27–C28                                 | 1.520(2)         |
| C11–H11               | 1.0000            | C27–C32                                 | 1.524(2)         |
| C11–C12               | 1.526(2)          | C28–H28A                                | 0.9900           |
| C11–C16               | 1.524(2)          | C28–H28B                                | 0.9900           |
| C12–H12A              | 0.9900            | C28–C29                                 | 1.529(3)         |
| C12–H12B              | 0.9900            | C29–H29A                                | 0.9900           |
| C12–C13               | 1.530(2)          | C29–H29B                                | 0.9900           |
| C13–H13A              | 0.9900            | C29–C30                                 | 1.516(3)         |
| C13–H13B              | 0.9900            | C30–H30A                                | 0.9900           |
| C13–C14               | 1.522(3)          | C30–H30B                                | 0.9900           |
| C14–H14A              | 0.9900            | C30–C31                                 | 1.517(4)         |
| C14–H14B              | 0.9900            | C31–H31A                                | 0.9900           |
| C14–C15               | 1.522(3)          | C31–H31B                                | 0.9900           |
| C15–H15A              | 0.9900            | C31–C32                                 | 1.523(3)         |
| C15–H15B              | 0.9900            | C32–H32A                                | 0.9900           |
| C15–C16               | 1.531(2)          | C32–H32B                                | 0.9900           |
| C16–H16A              | 0.9900            |                                         |                  |
| C16–H16B              | 0.9900            | <b>Atom–Atom–Atom</b>                   | <b>Angle [°]</b> |
| I2–Cu2                | 2.6292(2)         | Cu1–II–Cu1 <sup>#1</sup>                | 65.516(8)        |
| I2–Cu3                | 2.6418(2)         | II–Cu1–II <sup>#1</sup>                 | 114.485(8)       |
| Cu2–Cu3               | 2.9828(5)         | II <sup>#1</sup> –Cu1–Cu1 <sup>#1</sup> | 56.692(7)        |
| Cu2–S3 <sup>#3</sup>  | 2.3312(5)         | II–Cu1–Cu1 <sup>#1</sup>                | 57.793(8)        |
|                       |                   | S1 <sup>#2</sup> –Cu1–II                | 102.520(12)      |

|                                         |             |                                        |             |
|-----------------------------------------|-------------|----------------------------------------|-------------|
| S1 <sup>#2</sup> -Cu1-I1 <sup>#1</sup>  | 102.447(12) | S2-C10-H10B                            | 109.2       |
| S1 <sup>#2</sup> -Cu1-Cu1 <sup>#1</sup> | 113.544(14) | C9-C10-S2                              | 112.18(11)  |
| S2-Cu1-I1 <sup>#1</sup>                 | 107.843(12) | C9-C10-H10A                            | 109.2       |
| S2-Cu1-I1                               | 115.759(13) | C9-C10-H10B                            | 109.2       |
| S2-Cu1-Cu1 <sup>#1</sup>                | 133.155(14) | H10A-C10-H10B                          | 107.9       |
| S2-Cu1-S1 <sup>#2</sup>                 | 113.007(15) | S2-C11-H11                             | 108.6       |
| C1-S1-Cu1 <sup>#2</sup>                 | 110.60(6)   | C12-C11-S2                             | 111.99(11)  |
| C7-S1-Cu1 <sup>#2</sup>                 | 105.03(5)   | C12-C11-H11                            | 108.6       |
| C7-S1-C1                                | 100.81(8)   | C16-C11-S2                             | 106.89(10)  |
| C10-S2-Cu1                              | 104.56(5)   | C16-C11-H11                            | 108.6       |
| C10-S2-C11                              | 100.27(7)   | C16-C11-C12                            | 112.16(13)  |
| C11-S2-Cu1                              | 110.94(5)   | C11-C12-H12A                           | 109.3       |
| S1-C1-H1                                | 108.7       | C11-C12-H12B                           | 109.3       |
| C2-C1-S1                                | 108.29(11)  | C11-C12-C13                            | 111.48(13)  |
| C2-C1-H1                                | 108.7       | H12A-C12-H12B                          | 108.0       |
| C2-C1-C6                                | 110.94(13)  | C13-C12-H12A                           | 109.3       |
| C6-C1-S1                                | 111.53(12)  | C13-C12-H12B                           | 109.3       |
| C6-C1-H1                                | 108.7       | C12-C13-H13A                           | 109.4       |
| C1-C2-H2A                               | 109.1       | C12-C13-H13B                           | 109.4       |
| C1-C2-H2B                               | 109.1       | H13A-C13-H13B                          | 108.0       |
| H2A-C2-H2B                              | 107.8       | C14-C13-C12                            | 110.97(14)  |
| C3-C2-C1                                | 112.70(14)  | C14-C13-H13A                           | 109.4       |
| C3-C2-H2A                               | 109.1       | C14-C13-H13B                           | 109.4       |
| C3-C2-H2B                               | 109.1       | C13-C14-H14A                           | 109.5       |
| C2-C3-H3A                               | 109.4       | C13-C14-H14B                           | 109.5       |
| C2-C3-H3B                               | 109.4       | H14A-C14-H14B                          | 108.1       |
| H3A-C3-H3B                              | 108.0       | C15-C14-C13                            | 110.70(15)  |
| C4-C3-C2                                | 111.33(15)  | C15-C14-H14A                           | 109.5       |
| C4-C3-H3A                               | 109.4       | C15-C14-H14B                           | 109.5       |
| C4-C3-H3B                               | 109.4       | C14-C15-H15A                           | 109.4       |
| C3-C4-H4A                               | 109.4       | C14-C15-H15B                           | 109.4       |
| C3-C4-H4B                               | 109.4       | C14-C15-C16                            | 111.02(15)  |
| C3-C4-C5                                | 111.13(14)  | H15A-C15-H15B                          | 108.0       |
| H4A-C4-H4B                              | 108.0       | C16-C15-H15A                           | 109.4       |
| C5-C4-H4A                               | 109.4       | C16-C15-H15B                           | 109.4       |
| C5-C4-H4B                               | 109.4       | C11-C16-C15                            | 110.85(14)  |
| C4-C5-H5A                               | 109.5       | C11-C16-H16A                           | 109.5       |
| C4-C5-H5B                               | 109.5       | C11-C16-H16B                           | 109.5       |
| H5A-C5-H5B                              | 108.1       | C15-C16-H16A                           | 109.5       |
| C6-C5-C4                                | 110.84(15)  | C15-C16-H16B                           | 109.5       |
| C6-C5-H5A                               | 109.5       | H16A-C16-H16B                          | 108.1       |
| C6-C5-H5B                               | 109.5       | Cu2-I2-Cu3                             | 68.927(9)   |
| C1-C6-H6A                               | 109.1       | I2-Cu2-I2 <sup>#3</sup>                | 111.472(13) |
| C1-C6-H6B                               | 109.1       | I2-Cu2-Cu3                             | 55.736(7)   |
| C5-C6-C1                                | 112.59(14)  | I2 <sup>#3</sup> -Cu2-Cu3              | 55.736(6)   |
| C5-C6-H6A                               | 109.1       | S3-Cu2-I2                              | 111.352(11) |
| C5-C6-H6B                               | 109.1       | S3 <sup>#3</sup> -Cu2-I2               | 107.540(11) |
| H6A-C6-H6B                              | 107.8       | S3-Cu2-I2 <sup>#3</sup>                | 107.542(11) |
| S1-C7-H7A                               | 109.0       | S3 <sup>#3</sup> -Cu2-I2 <sup>#3</sup> | 111.354(11) |
| S1-C7-H7B                               | 109.0       | S3-Cu2-Cu3                             | 126.229(13) |
| H7A-C7-H7B                              | 107.8       | S3 <sup>#3</sup> -Cu2-Cu3              | 126.229(13) |
| C8-C7-S1                                | 112.84(11)  | S3 <sup>#3</sup> -Cu2-S3               | 107.54(3)   |
| C8-C7-H7A                               | 109.0       | I2-Cu3-I2 <sup>#3</sup>                | 110.674(13) |
| C8-C7-H7B                               | 109.0       | I2 <sup>#3</sup> -Cu3-Cu2              | 55.338(7)   |
| C9-C8-C7                                | 175.99(17)  | I2-Cu3-Cu2                             | 55.337(6)   |
| C8-C9-C10                               | 178.20(17)  | S4-Cu3-I2                              | 107.759(11) |
| S2-C10-H10A                             | 109.2       | S4-Cu3-I2 <sup>#3</sup>                | 110.730(11) |



|                                        |             |               |            |
|----------------------------------------|-------------|---------------|------------|
| S4 <sup>#3</sup> -Cu3-I2               | 110.728(11) | C24-C23-S3    | 113.08(13) |
| S4 <sup>#3</sup> -Cu3-I2 <sup>#3</sup> | 107.760(12) | C24-C23-H23A  | 109.0      |
| S4-Cu3-Cu2                             | 125.403(13) | C24-C23-H23B  | 109.0      |
| S4 <sup>#3</sup> -Cu3-Cu2              | 125.402(13) | C25-C24-C23   | 175.20(18) |
| S4-Cu3-S4 <sup>#3</sup>                | 109.20(3)   | C24-C25-C26   | 173.56(19) |
| C17-S3-Cu2                             | 104.36(5)   | S4-C26-H26A   | 109.3      |
| C23-S3-Cu2                             | 104.37(6)   | S4-C26-H26B   | 109.3      |
| C23-S3-C17                             | 102.39(8)   | C25-C26-S4    | 111.65(12) |
| C26-S4-Cu3                             | 105.00(6)   | C25-C26-H26A  | 109.3      |
| C27-S4-Cu3                             | 101.16(6)   | C25-C26-H26B  | 109.3      |
| C27-S4-C26                             | 102.41(9)   | H26A-C26-H26B | 108.0      |
| S3-C17-H17                             | 108.7       | S4-C27-H27    | 108.2      |
| C18-C17-S3                             | 106.89(11)  | C28-C27-S4    | 114.59(13) |
| C18-C17-H17                            | 108.7       | C28-C27-H27   | 108.2      |
| C22-C17-S3                             | 112.78(11)  | C28-C27-C32   | 110.86(15) |
| C22-C17-H17                            | 108.7       | C32-C27-S4    | 106.48(12) |
| C22-C17-C18                            | 111.08(14)  | C32-C27-H27   | 108.2      |
| C17-C18-H18A                           | 109.6       | C27-C28-H28A  | 109.9      |
| C17-C18-H18B                           | 109.6       | C27-C28-H28B  | 109.9      |
| C17-C18-C19                            | 110.12(15)  | C27-C28-C29   | 109.02(16) |
| H18A-C18-H18B                          | 108.2       | H28A-C28-H28B | 108.3      |
| C19-C18-H18A                           | 109.6       | C29-C28-H28A  | 109.9      |
| C19-C18-H18B                           | 109.6       | C29-C28-H28B  | 109.9      |
| C18-C19-H19A                           | 109.4       | C28-C29-H29A  | 109.4      |
| C18-C19-H19B                           | 109.4       | C28-C29-H29B  | 109.4      |
| H19A-C19-H19B                          | 108.0       | H29A-C29-H29B | 108.0      |
| C20-C19-C18                            | 111.30(15)  | C30-C29-C28   | 111.31(17) |
| C20-C19-H19A                           | 109.4       | C30-C29-H29A  | 109.4      |
| C20-C19-H19B                           | 109.4       | C30-C29-H29B  | 109.4      |
| C19-C20-H20A                           | 109.4       | C29-C30-H30A  | 109.5      |
| C19-C20-H20B                           | 109.4       | C29-C30-H30B  | 109.5      |
| H20A-C20-H20B                          | 108.0       | C29-C30-C31   | 110.77(19) |
| C21-C20-C19                            | 110.98(16)  | H30A-C30-H30B | 108.1      |
| C21-C20-H20A                           | 109.4       | C31-C30-H30A  | 109.5      |
| C21-C20-H20B                           | 109.4       | C31-C30-H30B  | 109.5      |
| C20-C21-H21A                           | 109.4       | C30-C31-H31A  | 109.2      |
| C20-C21-H21B                           | 109.4       | C30-C31-H31B  | 109.2      |
| C20-C21-C22                            | 111.11(16)  | C30-C31-C32   | 111.9(2)   |
| H21A-C21-H21B                          | 108.0       | H31A-C31-H31B | 107.9      |
| C22-C21-H21A                           | 109.4       | C32-C31-H31A  | 109.2      |
| C22-C21-H21B                           | 109.4       | C32-C31-H31B  | 109.2      |
| C17-C22-C21                            | 110.03(14)  | C27-C32-H32A  | 109.5      |
| C17-C22-H22A                           | 109.7       | C27-C32-H32B  | 109.5      |
| C17-C22-H22B                           | 109.7       | C31-C32-C27   | 110.55(16) |
| C21-C22-H22A                           | 109.7       | C31-C32-H32A  | 109.5      |
| C21-C22-H22B                           | 109.7       | C31-C32-H32B  | 109.5      |
| H22A-C22-H22B                          | 108.2       | H32A-C32-H32B | 108.1      |
| S3-C23-H23A                            | 109.0       |               |            |
| S3-C23-H23B                            | 109.0       |               |            |
| H23A-C23-H23B                          | 107.8       |               |            |

Symmetry transformations used to generate equivalent atoms:  
#1: 1.5-X, 1.5-Y, 1-Z; #2: 1.5-X, 0.5-Y, 1-Z; #3: 1-X, +Y, 0.5-Z;

**Table S27. Torsion angles for CP2D1\_140K**

| Atom-Atom-Atom-Atom         | Torsion Angle [°] |                             |             |
|-----------------------------|-------------------|-----------------------------|-------------|
| Cu1 <sup>#1</sup> -S1-C1-C2 | -59.69(11)        | Cu1 <sup>#1</sup> -S1-C7-C8 | -60.62(12)  |
| Cu1 <sup>#1</sup> -S1-C1-C6 | 177.95(10)        | Cu1-S2-C10-C9               | -177.51(10) |
|                             |                   | Cu1-S2-C11-C12              | -40.60(12)  |
|                             |                   | Cu1-S2-C11-C16              | 82.61(11)   |

|                 |             |                 |             |
|-----------------|-------------|-----------------|-------------|
| S1-C1-C2-C3     | -70.71(15)  | Cu3-S4-C27-C32  | -76.41(13)  |
| S1-C1-C6-C5     | 68.11(17)   | S3-C17-C18-C19  | 179.38(12)  |
| S2-C11-C12-C13  | 173.69(11)  | S3-C17-C22-C21  | 177.71(12)  |
| S2-C11-C16-C15  | -176.99(12) | S4-C27-C28-C29  | 179.43(13)  |
| C1-S1-C7-C8     | 54.35(13)   | S4-C27-C32-C31  | 177.53(18)  |
| C1-C2-C3-C4     | -54.11(19)  | C17-S3-C23-C24  | 58.50(14)   |
| C2-C1-C6-C5     | -52.71(19)  | C17-C18-C19-C20 | 56.0(2)     |
| C2-C3-C4-C5     | 55.8(2)     | C18-C17-C22-C21 | 57.73(19)   |
| C3-C4-C5-C6     | -56.3(2)    | C18-C19-C20-C21 | -55.8(2)    |
| C4-C5-C6-C1     | 55.2(2)     | C19-C20-C21-C22 | 56.3(2)     |
| C6-C1-C2-C3     | 52.00(19)   | C20-C21-C22-C17 | -57.0(2)    |
| C7-S1-C1-C2     | -170.41(11) | C22-C17-C18-C19 | -57.20(19)  |
| C7-S1-C1-C6     | 67.24(13)   | C23-S3-C17-C18  | -177.59(12) |
| C10-S2-C11-C12  | 69.45(12)   | C23-S3-C17-C22  | 60.05(14)   |
| C10-S2-C11-C16  | -167.34(11) | C26-S4-C27-C28  | 52.38(15)   |
| C11-S2-C10-C9   | 67.50(12)   | C26-S4-C27-C32  | 175.32(14)  |
| C11-C12-C13-C14 | -54.75(19)  | C27-S4-C26-C25  | 54.29(15)   |
| C12-C11-C16-C15 | -53.88(19)  | C27-C28-C29-C30 | -58.7(2)    |
| C12-C13-C14-C15 | 57.0(2)     | C28-C27-C32-C31 | -57.2(2)    |
| C13-C14-C15-C16 | -57.8(2)    | C28-C29-C30-C31 | 56.5(3)     |
| C14-C15-C16-C11 | 55.9(2)     | C29-C30-C31-C32 | -54.3(3)    |
| C16-C11-C12-C13 | 53.50(18)   | C30-C31-C32-C27 | 54.6(3)     |
| Cu2-S3-C17-C18  | -69.01(11)  | C32-C27-C28-C29 | 58.9(2)     |
| Cu2-S3-C17-C22  | 168.63(11)  |                 |             |
| Cu2-S3-C23-C24  | -50.07(14)  |                 |             |
| Cu3-S4-C26-C25  | -51.02(14)  |                 |             |
| Cu3-S4-C27-C28  | 160.65(12)  |                 |             |

Symmetry transformations used to generate equivalent atoms:  
#1: 1.5-X, 0.5-Y, 1-Z;

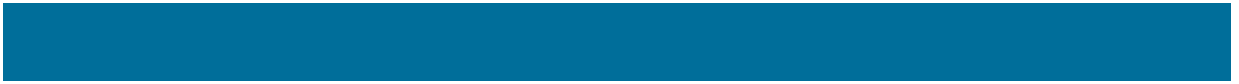

## Crystal Data and Experimental

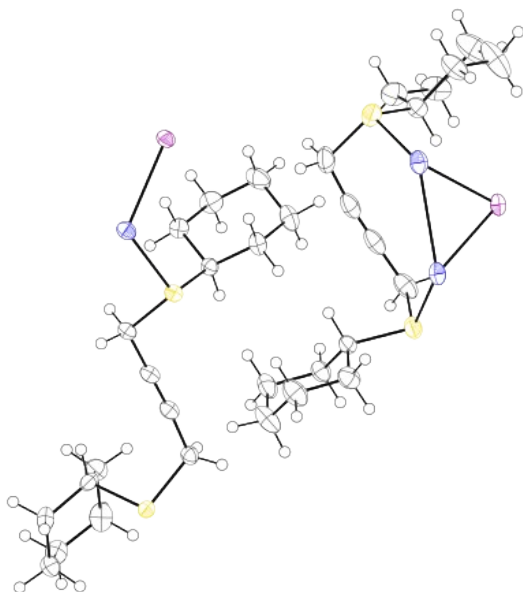

**Experimental:** The data for CP2D1\_180K were collected from a shock-cooled single crystal at 180.0(1) K on a Bruker D8 Venture CMOS with Photon 2 four-circle diffractometer with a X-ray tube using a graphite as monochromator and a CPAD PHOTON II area detector detector. The diffractometer was equipped with an Oxford Cryostream 800 low temperature device and used Mo  $K_{\alpha}$  radiation ( $\lambda = 0.71073 \text{ \AA}$ ). All data were integrated with SAINT V8.38A and a multi-scan absorption correction using SADABS 2016/2 was applied.<sup>[1,2]</sup> The structure was solved by direct methods with ShelXT and refined by full-matrix least-squares methods against  $F^2$  using SHELXL.<sup>[3,4]</sup> All non-hydrogen atoms were refined with anisotropic displacement parameters. The hydrogen atoms were refined isotropically on calculated positions using a riding model with their  $U_{iso}$  values constrained to 1.5 times the  $U_{eq}$  of their pivot atoms for terminal  $sp^3$  carbon atoms and 1.2 times for all other carbon atoms. Crystallographic data for the structures reported in this paper have been deposited with the Cambridge Crystallographic Data Centre.<sup>[5]</sup> CCDC 2326503 contain the supplementary crystallographic data for this paper. These data can be obtained free of charge from The Cambridge Crystallographic Data Centre via [www.ccdc.cam.ac.uk/structures](http://www.ccdc.cam.ac.uk/structures). This report and the CIF file were generated using FinalCif.<sup>[6]</sup>

**Table S28.** Crystal data and structure refinement for CP2D1\_180K

|                                           |                                                                      |
|-------------------------------------------|----------------------------------------------------------------------|
| Internal Reference                        | CP2D1_180K                                                           |
| CCDC number                               | 2326503                                                              |
| Empirical formula                         | $C_{16}H_{26}CuS_2$                                                  |
| Formula weight                            | 472.93                                                               |
| Temperature [K]                           | 180.0(1)                                                             |
| Crystal system                            | monoclinic                                                           |
| Space group (number)                      | $C2/c$ (15)                                                          |
| $a$ [Å]                                   | 31.8836(12)                                                          |
| $b$ [Å]                                   | 10.1900(4)                                                           |
| $c$ [Å]                                   | 22.9758(9)                                                           |
| $\alpha$ [°]                              | 90                                                                   |
| $\beta$ [°]                               | 96.8390(10)                                                          |
| $\gamma$ [°]                              | 90                                                                   |
| Volume [Å <sup>3</sup> ]                  | 7411.6(5)                                                            |
| $Z$                                       | 16                                                                   |
| $\rho_{calc}$ [gcm <sup>-3</sup> ]        | 1.695                                                                |
| $\mu$ [mm <sup>-1</sup> ]                 | 3.060                                                                |
| $F(000)$                                  | 3776                                                                 |
| Crystal size [mm <sup>3</sup> ]           | 0.247×0.279×0.481                                                    |
| Crystal colour                            | clear light yellow                                                   |
| Crystal shape                             | block                                                                |
| Radiation                                 | Mo $K_{\alpha}$ ( $\lambda=0.71073 \text{ \AA}$ )                    |
| $2\theta$ range [°]                       | 5.41 to 55.00 (0.77 Å)                                               |
| Index ranges                              | $-41 \leq h \leq 41$<br>$-13 \leq k \leq 13$<br>$-29 \leq l \leq 29$ |
| Reflections collected                     | 85592                                                                |
| Independent reflections                   | 8493<br>$R_{int} = 0.0236$<br>$R_{sigma} = 0.0122$                   |
| Completeness to $\theta = 25.242^\circ$   | 99.7 %                                                               |
| Data / Restraints / Parameters            | 8493 / 0 / 362                                                       |
| Goodness-of-fit on $F^2$                  | 1.157                                                                |
| Final $R$ indexes [ $I \geq 2\sigma(I)$ ] | $R_1 = 0.0165$<br>$wR_2 = 0.0401$                                    |
| Final $R$ indexes [all data]              | $R_1 = 0.0169$<br>$wR_2 = 0.0403$                                    |
| Largest peak/hole [eÅ <sup>-3</sup> ]     | 0.60/-0.50                                                           |

**Table S29. Bond lengths and angles for CP2D1\_180K**

| <b>Atom–Atom</b>      | <b>Length [Å]</b> |                                         |                  |
|-----------------------|-------------------|-----------------------------------------|------------------|
| II–Cu1                | 2.6322(2)         | Cu2–S3                                  | 2.3345(5)        |
| II–Cu1 <sup>#1</sup>  | 2.6654(2)         | Cu3–S4 <sup>#3</sup>                    | 2.3527(5)        |
| Cu1–Cu1 <sup>#1</sup> | 2.8770(4)         | Cu3–S4                                  | 2.3527(5)        |
| Cu1–S1 <sup>#2</sup>  | 2.3463(4)         | S3–C17                                  | 1.8250(16)       |
| Cu1–S2                | 2.3215(4)         | S3–C23                                  | 1.824(2)         |
| S1–C1                 | 1.8368(16)        | S4–C26                                  | 1.831(2)         |
| S1–C7                 | 1.8246(16)        | S4–C27                                  | 1.8262(18)       |
| S2–C10                | 1.8209(16)        | C17–H17                                 | 1.0000           |
| S2–C11                | 1.8305(15)        | C17–C18                                 | 1.522(2)         |
| C1–H1                 | 1.0000            | C17–C22                                 | 1.523(2)         |
| C1–C2                 | 1.524(2)          | C18–H18A                                | 0.9900           |
| C1–C6                 | 1.526(3)          | C18–H18B                                | 0.9900           |
| C2–H2A                | 0.9900            | C18–C19                                 | 1.529(3)         |
| C2–H2B                | 0.9900            | C19–H19A                                | 0.9900           |
| C2–C3                 | 1.520(2)          | C19–H19B                                | 0.9900           |
| C3–H3A                | 0.9900            | C19–C20                                 | 1.522(3)         |
| C3–H3B                | 0.9900            | C20–H20A                                | 0.9900           |
| C3–C4                 | 1.517(3)          | C20–H20B                                | 0.9900           |
| C4–H4A                | 0.9900            | C20–C21                                 | 1.517(3)         |
| C4–H4B                | 0.9900            | C21–H21A                                | 0.9900           |
| C4–C5                 | 1.516(3)          | C21–H21B                                | 0.9900           |
| C5–H5A                | 0.9900            | C21–C22                                 | 1.525(2)         |
| C5–H5B                | 0.9900            | C22–H22A                                | 0.9900           |
| C5–C6                 | 1.520(3)          | C22–H22B                                | 0.9900           |
| C6–H6A                | 0.9900            | C23–H23A                                | 0.9900           |
| C6–H6B                | 0.9900            | C23–H23B                                | 0.9900           |
| C7–H7A                | 0.9900            | C23–C24                                 | 1.453(3)         |
| C7–H7B                | 0.9900            | C24–C25                                 | 1.185(3)         |
| C7–C8                 | 1.459(2)          | C25–C26                                 | 1.448(3)         |
| C8–C9                 | 1.192(2)          | C26–H26A                                | 0.9900           |
| C9–C10                | 1.459(2)          | C26–H26B                                | 0.9900           |
| C10–H10A              | 0.9900            | C27–H27                                 | 1.0000           |
| C10–H10B              | 0.9900            | C27–C28                                 | 1.519(2)         |
| C11–H11               | 1.0000            | C27–C32                                 | 1.521(3)         |
| C11–C12               | 1.522(2)          | C28–H28A                                | 0.9900           |
| C11–C16               | 1.523(2)          | C28–H28B                                | 0.9900           |
| C12–H12A              | 0.9900            | C28–C29                                 | 1.529(3)         |
| C12–H12B              | 0.9900            | C29–H29A                                | 0.9900           |
| C12–C13               | 1.527(2)          | C29–H29B                                | 0.9900           |
| C13–H13A              | 0.9900            | C29–C30                                 | 1.513(3)         |
| C13–H13B              | 0.9900            | C30–H30A                                | 0.9900           |
| C13–C14               | 1.518(3)          | C30–H30B                                | 0.9900           |
| C14–H14A              | 0.9900            | C30–C31                                 | 1.511(4)         |
| C14–H14B              | 0.9900            | C31–H31A                                | 0.9900           |
| C14–C15               | 1.519(3)          | C31–H31B                                | 0.9900           |
| C15–H15A              | 0.9900            | C31–C32                                 | 1.521(3)         |
| C15–H15B              | 0.9900            | C32–H32A                                | 0.9900           |
| C15–C16               | 1.532(2)          | C32–H32B                                | 0.9900           |
| C16–H16A              | 0.9900            |                                         |                  |
| C16–H16B              | 0.9900            | <b>Atom–Atom–Atom</b>                   | <b>Angle [°]</b> |
| I2–Cu2                | 2.6305(2)         | Cu1–II–Cu1 <sup>#1</sup>                | 65.784(8)        |
| I2–Cu3                | 2.6424(2)         | II–Cu1–II <sup>#1</sup>                 | 114.215(8)       |
| Cu2–Cu3               | 2.9769(5)         | II <sup>#1</sup> –Cu1–Cu1 <sup>#1</sup> | 56.553(7)        |
| Cu2–S3 <sup>#3</sup>  | 2.3345(5)         | II–Cu1–Cu1 <sup>#1</sup>                | 57.663(7)        |
|                       |                   | S1 <sup>#2</sup> –Cu1–II                | 102.679(11)      |

|                                         |             |                                        |             |
|-----------------------------------------|-------------|----------------------------------------|-------------|
| S1 <sup>#2</sup> -Cu1-I1 <sup>#1</sup>  | 102.418(12) | S2-C10-H10B                            | 109.2       |
| S1 <sup>#2</sup> -Cu1-Cu1 <sup>#1</sup> | 113.581(14) | C9-C10-S2                              | 112.18(11)  |
| S2-Cu1-I1 <sup>#1</sup>                 | 107.939(12) | C9-C10-H10A                            | 109.2       |
| S2-Cu1-I1                               | 115.828(12) | C9-C10-H10B                            | 109.2       |
| S2-Cu1-Cu1 <sup>#1</sup>                | 133.150(14) | H10A-C10-H10B                          | 107.9       |
| S2-Cu1-S1 <sup>#2</sup>                 | 112.966(15) | S2-C11-H11                             | 108.5       |
| C1-S1-Cu1 <sup>#2</sup>                 | 110.75(6)   | C12-C11-S2                             | 112.14(11)  |
| C7-S1-Cu1 <sup>#2</sup>                 | 105.18(5)   | C12-C11-H11                            | 108.5       |
| C7-S1-C1                                | 100.88(8)   | C12-C11-C16                            | 112.26(13)  |
| C10-S2-Cu1                              | 104.56(5)   | C16-C11-S2                             | 106.84(11)  |
| C10-S2-C11                              | 100.32(7)   | C16-C11-H11                            | 108.5       |
| C11-S2-Cu1                              | 110.95(5)   | C11-C12-H12A                           | 109.3       |
| S1-C1-H1                                | 108.6       | C11-C12-H12B                           | 109.3       |
| C2-C1-S1                                | 108.32(12)  | C11-C12-C13                            | 111.49(14)  |
| C2-C1-H1                                | 108.6       | H12A-C12-H12B                          | 108.0       |
| C2-C1-C6                                | 110.90(14)  | C13-C12-H12A                           | 109.3       |
| C6-C1-S1                                | 111.70(12)  | C13-C12-H12B                           | 109.3       |
| C6-C1-H1                                | 108.6       | C12-C13-H13A                           | 109.4       |
| C1-C2-H2A                               | 109.1       | C12-C13-H13B                           | 109.4       |
| C1-C2-H2B                               | 109.1       | H13A-C13-H13B                          | 108.0       |
| H2A-C2-H2B                              | 107.8       | C14-C13-C12                            | 111.16(15)  |
| C3-C2-C1                                | 112.67(14)  | C14-C13-H13A                           | 109.4       |
| C3-C2-H2A                               | 109.1       | C14-C13-H13B                           | 109.4       |
| C3-C2-H2B                               | 109.1       | C13-C14-H14A                           | 109.5       |
| C2-C3-H3A                               | 109.3       | C13-C14-H14B                           | 109.5       |
| C2-C3-H3B                               | 109.3       | C13-C14-C15                            | 110.83(16)  |
| H3A-C3-H3B                              | 108.0       | H14A-C14-H14B                          | 108.1       |
| C4-C3-C2                                | 111.45(16)  | C15-C14-H14A                           | 109.5       |
| C4-C3-H3A                               | 109.3       | C15-C14-H14B                           | 109.5       |
| C4-C3-H3B                               | 109.3       | C14-C15-H15A                           | 109.4       |
| C3-C4-H4A                               | 109.4       | C14-C15-H15B                           | 109.4       |
| C3-C4-H4B                               | 109.4       | C14-C15-C16                            | 111.10(15)  |
| H4A-C4-H4B                              | 108.0       | H15A-C15-H15B                          | 108.0       |
| C5-C4-C3                                | 111.10(14)  | C16-C15-H15A                           | 109.4       |
| C5-C4-H4A                               | 109.4       | C16-C15-H15B                           | 109.4       |
| C5-C4-H4B                               | 109.4       | C11-C16-C15                            | 110.85(14)  |
| C4-C5-H5A                               | 109.5       | C11-C16-H16A                           | 109.5       |
| C4-C5-H5B                               | 109.5       | C11-C16-H16B                           | 109.5       |
| C4-C5-C6                                | 110.89(16)  | C15-C16-H16A                           | 109.5       |
| H5A-C5-H5B                              | 108.0       | C15-C16-H16B                           | 109.5       |
| C6-C5-H5A                               | 109.5       | H16A-C16-H16B                          | 108.1       |
| C6-C5-H5B                               | 109.5       | Cu2-I2-Cu3                             | 68.745(9)   |
| C1-C6-H6A                               | 109.1       | I2 <sup>#3</sup> -Cu2-I2               | 111.635(13) |
| C1-C6-H6B                               | 109.1       | I2 <sup>#3</sup> -Cu2-Cu3              | 55.818(6)   |
| C5-C6-C1                                | 112.58(15)  | I2-Cu2-Cu3                             | 55.818(6)   |
| C5-C6-H6A                               | 109.1       | S3-Cu2-I2 <sup>#3</sup>                | 111.315(11) |
| C5-C6-H6B                               | 109.1       | S3 <sup>#3</sup> -Cu2-I2 <sup>#3</sup> | 107.462(11) |
| H6A-C6-H6B                              | 107.8       | S3-Cu2-I2                              | 107.460(11) |
| S1-C7-H7A                               | 109.0       | S3 <sup>#3</sup> -Cu2-I2               | 111.314(11) |
| S1-C7-H7B                               | 109.0       | S3-Cu2-Cu3                             | 126.193(13) |
| H7A-C7-H7B                              | 107.8       | S3 <sup>#3</sup> -Cu2-Cu3              | 126.194(14) |
| C8-C7-S1                                | 112.84(11)  | S3 <sup>#3</sup> -Cu2-S3               | 107.61(3)   |
| C8-C7-H7A                               | 109.0       | I2 <sup>#3</sup> -Cu3-I2               | 110.874(13) |
| C8-C7-H7B                               | 109.0       | I2-Cu3-Cu2                             | 55.437(7)   |
| C9-C8-C7                                | 176.23(17)  | I2 <sup>#3</sup> -Cu3-Cu2              | 55.436(6)   |
| C8-C9-C10                               | 178.20(17)  | S4-Cu3-I2 <sup>#3</sup>                | 107.741(12) |
| S2-C10-H10A                             | 109.2       | S4-Cu3-I2                              | 110.774(11) |

|                                        |             |               |            |
|----------------------------------------|-------------|---------------|------------|
| S4 <sup>#3</sup> -Cu3-I2 <sup>#3</sup> | 110.775(11) | C24-C23-S3    | 113.20(13) |
| S4 <sup>#3</sup> -Cu3-I2               | 107.741(12) | C24-C23-H23A  | 108.9      |
| S4-Cu3-Cu2                             | 125.532(14) | C24-C23-H23B  | 108.9      |
| S4 <sup>#3</sup> -Cu3-Cu2              | 125.533(14) | C25-C24-C23   | 175.09(19) |
| S4-Cu3-S4 <sup>#3</sup>                | 108.94(3)   | C24-C25-C26   | 173.73(19) |
| C17-S3-Cu2                             | 104.45(5)   | S4-C26-H26A   | 109.3      |
| C23-S3-Cu2                             | 104.40(6)   | S4-C26-H26B   | 109.3      |
| C23-S3-C17                             | 102.37(9)   | C25-C26-S4    | 111.78(13) |
| C26-S4-Cu3                             | 104.93(7)   | C25-C26-H26A  | 109.3      |
| C27-S4-Cu3                             | 101.37(6)   | C25-C26-H26B  | 109.3      |
| C27-S4-C26                             | 102.37(9)   | H26A-C26-H26B | 107.9      |
| S3-C17-H17                             | 108.6       | S4-C27-H27    | 108.2      |
| C18-C17-S3                             | 107.05(12)  | C28-C27-S4    | 114.60(13) |
| C18-C17-H17                            | 108.6       | C28-C27-H27   | 108.2      |
| C18-C17-C22                            | 111.06(14)  | C28-C27-C32   | 111.05(16) |
| C22-C17-S3                             | 112.78(12)  | C32-C27-S4    | 106.48(13) |
| C22-C17-H17                            | 108.6       | C32-C27-H27   | 108.2      |
| C17-C18-H18A                           | 109.6       | C27-C28-H28A  | 109.9      |
| C17-C18-H18B                           | 109.6       | C27-C28-H28B  | 109.9      |
| C17-C18-C19                            | 110.24(15)  | C27-C28-C29   | 109.05(17) |
| H18A-C18-H18B                          | 108.1       | H28A-C28-H28B | 108.3      |
| C19-C18-H18A                           | 109.6       | C29-C28-H28A  | 109.9      |
| C19-C18-H18B                           | 109.6       | C29-C28-H28B  | 109.9      |
| C18-C19-H19A                           | 109.4       | C28-C29-H29A  | 109.3      |
| C18-C19-H19B                           | 109.4       | C28-C29-H29B  | 109.3      |
| H19A-C19-H19B                          | 108.0       | H29A-C29-H29B | 108.0      |
| C20-C19-C18                            | 111.25(17)  | C30-C29-C28   | 111.47(19) |
| C20-C19-H19A                           | 109.4       | C30-C29-H29A  | 109.3      |
| C20-C19-H19B                           | 109.4       | C30-C29-H29B  | 109.3      |
| C19-C20-H20A                           | 109.4       | C29-C30-H30A  | 109.5      |
| C19-C20-H20B                           | 109.4       | C29-C30-H30B  | 109.5      |
| H20A-C20-H20B                          | 108.0       | H30A-C30-H30B | 108.1      |
| C21-C20-C19                            | 110.96(17)  | C31-C30-C29   | 110.9(2)   |
| C21-C20-H20A                           | 109.4       | C31-C30-H30A  | 109.5      |
| C21-C20-H20B                           | 109.4       | C31-C30-H30B  | 109.5      |
| C20-C21-H21A                           | 109.4       | C30-C31-H31A  | 109.1      |
| C20-C21-H21B                           | 109.4       | C30-C31-H31B  | 109.1      |
| C20-C21-C22                            | 111.13(17)  | C30-C31-C32   | 112.3(2)   |
| H21A-C21-H21B                          | 108.0       | H31A-C31-H31B | 107.9      |
| C22-C21-H21A                           | 109.4       | C32-C31-H31A  | 109.1      |
| C22-C21-H21B                           | 109.4       | C32-C31-H31B  | 109.1      |
| C17-C22-C21                            | 110.06(14)  | C27-C32-H32A  | 109.6      |
| C17-C22-H22A                           | 109.6       | C27-C32-H32B  | 109.6      |
| C17-C22-H22B                           | 109.6       | C31-C32-C27   | 110.38(17) |
| C21-C22-H22A                           | 109.6       | C31-C32-H32A  | 109.6      |
| C21-C22-H22B                           | 109.6       | C31-C32-H32B  | 109.6      |
| H22A-C22-H22B                          | 108.2       | H32A-C32-H32B | 108.1      |
| S3-C23-H23A                            | 108.9       |               |            |
| S3-C23-H23B                            | 108.9       |               |            |
| H23A-C23-H23B                          | 107.8       |               |            |

Symmetry transformations used to generate equivalent atoms:  
#1: -1.5-X, -0.5-Y, -1-Z; #2: -1.5-X, -1.5-Y, -1-Z; #3: -1-X, +Y, -0.5-Z;

**Table S30. Torsion angles for CP2D1\_180K**

| Atom-Atom-Atom-Atom         | Torsion Angle [°] |                             |             |
|-----------------------------|-------------------|-----------------------------|-------------|
| Cu1 <sup>#1</sup> -S1-C1-C2 | -59.46(11)        | Cu1 <sup>#1</sup> -S1-C7-C8 | -60.79(12)  |
| Cu1 <sup>#1</sup> -S1-C1-C6 | 178.11(11)        | Cu1-S2-C10-C9               | -177.27(10) |
|                             |                   | Cu1-S2-C11-C12              | -40.64(12)  |
|                             |                   | Cu1-S2-C11-C16              | 82.76(11)   |

|                 |             |                 |             |
|-----------------|-------------|-----------------|-------------|
| S1-C1-C2-C3     | -71.05(16)  | Cu3-S4-C27-C32  | -76.16(14)  |
| S1-C1-C6-C5     | 68.33(18)   | S3-C17-C18-C19  | 179.38(13)  |
| S2-C11-C12-C13  | 173.65(12)  | S3-C17-C22-C21  | 177.82(13)  |
| S2-C11-C16-C15  | -176.95(13) | S4-C27-C28-C29  | 179.38(14)  |
| C1-S1-C7-C8     | 54.41(13)   | S4-C27-C32-C31  | 177.6(2)    |
| C1-C2-C3-C4     | -54.0(2)    | C17-S3-C23-C24  | 58.78(15)   |
| C2-C1-C6-C5     | -52.6(2)    | C17-C18-C19-C20 | 55.9(2)     |
| C2-C3-C4-C5     | 55.9(2)     | C18-C17-C22-C21 | 57.7(2)     |
| C3-C4-C5-C6     | -56.4(2)    | C18-C19-C20-C21 | -55.7(3)    |
| C4-C5-C6-C1     | 55.2(2)     | C19-C20-C21-C22 | 56.3(2)     |
| C6-C1-C2-C3     | 51.87(19)   | C20-C21-C22-C17 | -57.1(2)    |
| C7-S1-C1-C2     | -170.43(11) | C22-C17-C18-C19 | -57.1(2)    |
| C7-S1-C1-C6     | 67.14(13)   | C23-S3-C17-C18  | -177.61(12) |
| C10-S2-C11-C12  | 69.45(12)   | C23-S3-C17-C22  | 59.95(14)   |
| C10-S2-C11-C16  | -167.16(11) | C26-S4-C27-C28  | 52.40(16)   |
| C11-S2-C10-C9   | 67.71(12)   | C26-S4-C27-C32  | 175.59(15)  |
| C11-C12-C13-C14 | -54.6(2)    | C27-S4-C26-C25  | 54.76(16)   |
| C12-C11-C16-C15 | -53.62(19)  | C27-C28-C29-C30 | -58.2(3)    |
| C12-C13-C14-C15 | 56.8(2)     | C28-C27-C32-C31 | -57.1(3)    |
| C13-C14-C15-C16 | -57.4(2)    | C28-C29-C30-C31 | 56.0(3)     |
| C14-C15-C16-C11 | 55.5(2)     | C29-C30-C31-C32 | -54.0(4)    |
| C16-C11-C12-C13 | 53.35(18)   | C30-C31-C32-C27 | 54.5(3)     |
| Cu2-S3-C17-C18  | -68.98(12)  | C32-C27-C28-C29 | 58.7(2)     |
| Cu2-S3-C17-C22  | 168.58(11)  |                 |             |
| Cu2-S3-C23-C24  | -49.88(14)  |                 |             |
| Cu3-S4-C26-C25  | -50.74(15)  |                 |             |
| Cu3-S4-C27-C28  | 160.65(13)  |                 |             |

Symmetry transformations used to generate equivalent atoms:  
#1: -1.5-X, -1.5-Y, -1-Z;





## Crystal Data and Experimental

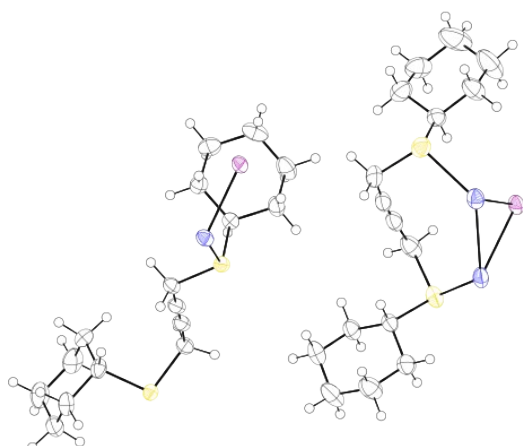

**Experimental:** The data for CP2D1\_220K were collected from a shock-cooled single crystal at 220.0(1) K on a Bruker D8 Venture CMOS with Photon 2 four-circle diffractometer with a X-ray tube using a graphite as monochromator and a CPAD PHOTON II area detector detector. The diffractometer was equipped with an Oxford Cryostream 800 low temperature device and used Mo  $K_{\alpha}$  radiation ( $\lambda = 0.71073 \text{ \AA}$ ). All data were integrated with SAINT V8.38A and a multi-scan absorption correction using SADABS 2016/2 was applied.<sup>[1,2]</sup> The structure was solved by direct methods with ShelXT and refined by full-matrix least-squares methods against  $F^2$  using SHELXL.<sup>[3,4]</sup> All non-hydrogen atoms were refined with anisotropic displacement parameters. The hydrogen atoms were refined isotropically on calculated positions using a riding model with their  $U_{\text{iso}}$  values constrained to 1.5 times the  $U_{\text{eq}}$  of their pivot atoms for terminal  $\text{sp}^3$  carbon atoms and 1.2 times for all other carbon atoms. Crystallographic data for the structures reported in this paper have been deposited with the Cambridge Crystallographic Data Centre.<sup>[5]</sup> CCDC 2326504 contain the supplementary crystallographic data for this paper. These data can be obtained free of charge from The Cambridge Crystallographic Data Centre via [www.ccdc.cam.ac.uk/structures](http://www.ccdc.cam.ac.uk/structures). This report and the CIF file were generated using FinalCif.<sup>[6]</sup>

**Table S31.** Crystal data and structure refinement for CP2D1\_220K

|                                           |                                                                      |
|-------------------------------------------|----------------------------------------------------------------------|
| Internal Reference                        | CP2D1_220K                                                           |
| CCDC number                               | 2326504                                                              |
| Empirical formula                         | $\text{C}_{16}\text{H}_{26}\text{CuS}_2$                             |
| Formula weight                            | 472.93                                                               |
| Temperature [K]                           | 220.0(1)                                                             |
| Crystal system                            | monoclinic                                                           |
| Space group (number)                      | $C2/c$ (15)                                                          |
| $a$ [Å]                                   | 31.903(2)                                                            |
| $b$ [Å]                                   | 10.2246(7)                                                           |
| $c$ [Å]                                   | 23.0547(15)                                                          |
| $\alpha$ [°]                              | 90                                                                   |
| $\beta$ [°]                               | 96.911(2)                                                            |
| $\gamma$ [°]                              | 90                                                                   |
| Volume [Å <sup>3</sup> ]                  | 7465.8(9)                                                            |
| $Z$                                       | 16                                                                   |
| $\rho_{\text{calc}}$ [gcm <sup>-3</sup> ] | 1.683                                                                |
| $\mu$ [mm <sup>-1</sup> ]                 | 3.038                                                                |
| $F(000)$                                  | 3776                                                                 |
| Crystal size [mm <sup>3</sup> ]           | 0.247×0.279×0.481                                                    |
| Crystal colour                            | clear light yellow                                                   |
| Crystal shape                             | block                                                                |
| Radiation                                 | Mo $K_{\alpha}$ ( $\lambda=0.71073 \text{ \AA}$ )                    |
| $2\theta$ range [°]                       | 5.39 to 55.00 (0.77 Å)                                               |
| Index ranges                              | $-41 \leq h \leq 41$<br>$-13 \leq k \leq 13$<br>$-29 \leq l \leq 29$ |
| Reflections collected                     | 85128                                                                |
| Independent reflections                   | 8547<br>$R_{\text{int}} = 0.0225$<br>$R_{\text{sigma}} = 0.0128$     |
| Completeness to $\theta = 25.242^\circ$   | 99.6 %                                                               |
| Data / Restraints / Parameters            | 8547 / 0 / 363                                                       |
| Goodness-of-fit on $F^2$                  | 1.163                                                                |
| Final $R$ indexes [ $I \geq 2\sigma(I)$ ] | $R_1 = 0.0165$<br>$wR_2 = 0.0411$                                    |
| Final $R$ indexes [all data]              | $R_1 = 0.0171$<br>$wR_2 = 0.0414$                                    |
| Largest peak/hole [eÅ <sup>-3</sup> ]     | 0.67/-0.42                                                           |
| Extinction coefficient                    | 0.00022(2)                                                           |

**Table S32. Bond lengths and angles for CP2D1\_220K**

| <b>Atom–Atom</b>      | <b>Length [Å]</b> |                                         |                  |
|-----------------------|-------------------|-----------------------------------------|------------------|
| II–Cu1                | 2.6336(3)         | Cu2–S3 <sup>#3</sup>                    | 2.3386(5)        |
| II–Cu1 <sup>#1</sup>  | 2.6660(3)         | Cu3–S4                                  | 2.3561(5)        |
| Cu1–Cu1 <sup>#1</sup> | 2.8889(4)         | Cu3–S4 <sup>#3</sup>                    | 2.3560(5)        |
| Cu1–S1 <sup>#2</sup>  | 2.3504(4)         | S3–C17                                  | 1.8243(17)       |
| Cu1–S2                | 2.3246(4)         | S3–C23                                  | 1.824(2)         |
| S1–C1                 | 1.8352(16)        | S4–C26                                  | 1.830(2)         |
| S1–C7                 | 1.8236(16)        | S4–C27                                  | 1.8266(19)       |
| S2–C10                | 1.8208(16)        | C17–H17                                 | 0.9900           |
| S2–C11                | 1.8317(15)        | C17–C18                                 | 1.520(3)         |
| C1–H1                 | 0.9900            | C17–C22                                 | 1.524(2)         |
| C1–C2                 | 1.522(3)          | C18–H18A                                | 0.9800           |
| C1–C6                 | 1.524(3)          | C18–H18B                                | 0.9800           |
| C2–H2A                | 0.9800            | C18–C19                                 | 1.529(3)         |
| C2–H2B                | 0.9800            | C19–H19A                                | 0.9800           |
| C2–C3                 | 1.515(3)          | C19–H19B                                | 0.9800           |
| C3–H3A                | 0.9800            | C19–C20                                 | 1.517(3)         |
| C3–H3B                | 0.9800            | C20–H20A                                | 0.9800           |
| C3–C4                 | 1.511(3)          | C20–H20B                                | 0.9800           |
| C4–H4A                | 0.9800            | C20–C21                                 | 1.512(3)         |
| C4–H4B                | 0.9800            | C21–H21A                                | 0.9800           |
| C4–C5                 | 1.513(3)          | C21–H21B                                | 0.9800           |
| C5–H5A                | 0.9800            | C21–C22                                 | 1.522(3)         |
| C5–H5B                | 0.9800            | C22–H22A                                | 0.9800           |
| C5–C6                 | 1.520(3)          | C22–H22B                                | 0.9800           |
| C6–H6A                | 0.9800            | C23–H23A                                | 0.9800           |
| C6–H6B                | 0.9800            | C23–H23B                                | 0.9800           |
| C7–H7A                | 0.9800            | C23–C24                                 | 1.455(3)         |
| C7–H7B                | 0.9800            | C24–C25                                 | 1.182(3)         |
| C7–C8                 | 1.457(2)          | C25–C26                                 | 1.445(3)         |
| C8–C9                 | 1.192(2)          | C26–H26A                                | 0.9800           |
| C9–C10                | 1.459(2)          | C26–H26B                                | 0.9800           |
| C10–H10A              | 0.9800            | C27–H27                                 | 0.9900           |
| C10–H10B              | 0.9800            | C27–C28                                 | 1.516(3)         |
| C11–H11               | 0.9900            | C27–C32                                 | 1.521(3)         |
| C11–C12               | 1.524(2)          | C28–H28A                                | 0.9800           |
| C11–C16               | 1.521(2)          | C28–H28B                                | 0.9800           |
| C12–H12A              | 0.9800            | C28–C29                                 | 1.527(3)         |
| C12–H12B              | 0.9800            | C29–H29A                                | 0.9800           |
| C12–C13               | 1.527(2)          | C29–H29B                                | 0.9800           |
| C13–H13A              | 0.9800            | C29–C30                                 | 1.507(4)         |
| C13–H13B              | 0.9800            | C30–H30A                                | 0.9800           |
| C13–C14               | 1.516(3)          | C30–H30B                                | 0.9800           |
| C14–H14A              | 0.9800            | C30–C31                                 | 1.504(4)         |
| C14–H14B              | 0.9800            | C31–H31A                                | 0.9800           |
| C14–C15               | 1.518(3)          | C31–H31B                                | 0.9800           |
| C15–H15A              | 0.9800            | C31–C32                                 | 1.523(3)         |
| C15–H15B              | 0.9800            | C32–H32A                                | 0.9800           |
| C15–C16               | 1.529(3)          | C32–H32B                                | 0.9800           |
| C16–H16A              | 0.9800            |                                         |                  |
| C16–H16B              | 0.9800            | <b>Atom–Atom–Atom</b>                   | <b>Angle [°]</b> |
| I2–Cu2                | 2.6316(3)         | Cu1–II–Cu1 <sup>#1</sup>                | 66.063(9)        |
| I2–Cu3                | 2.6429(3)         | II–Cu1–II <sup>#1</sup>                 | 113.937(8)       |
| Cu2–Cu3               | 2.9712(5)         | II <sup>#1</sup> –Cu1–Cu1 <sup>#1</sup> | 56.429(7)        |
| Cu2–S3                | 2.3386(5)         | II–Cu1–Cu1 <sup>#1</sup>                | 57.508(8)        |
|                       |                   | S1 <sup>#2</sup> –Cu1–II                | 102.854(12)      |

|                                         |             |                                        |             |
|-----------------------------------------|-------------|----------------------------------------|-------------|
| S1 <sup>#2</sup> -Cu1-I1 <sup>#1</sup>  | 102.401(12) | S2-C10-H10B                            | 109.1       |
| S1 <sup>#2</sup> -Cu1-Cu1 <sup>#1</sup> | 113.640(14) | C9-C10-S2                              | 112.29(12)  |
| S2-Cu1-I1 <sup>#1</sup>                 | 108.011(12) | C9-C10-H10A                            | 109.1       |
| S2-Cu1-I1                               | 115.949(13) | C9-C10-H10B                            | 109.1       |
| S2-Cu1-Cu1 <sup>#1</sup>                | 133.175(15) | H10A-C10-H10B                          | 107.9       |
| S2-Cu1-S1 <sup>#2</sup>                 | 112.870(15) | S2-C11-H11                             | 108.5       |
| C1-S1-Cu1 <sup>#2</sup>                 | 110.95(6)   | C12-C11-S2                             | 112.10(11)  |
| C7-S1-Cu1 <sup>#2</sup>                 | 105.31(5)   | C12-C11-H11                            | 108.5       |
| C7-S1-C1                                | 100.90(8)   | C16-C11-S2                             | 106.88(11)  |
| C10-S2-Cu1                              | 104.64(5)   | C16-C11-H11                            | 108.5       |
| C10-S2-C11                              | 100.33(7)   | C16-C11-C12                            | 112.26(14)  |
| C11-S2-Cu1                              | 111.00(5)   | C11-C12-H12A                           | 109.3       |
| S1-C1-H1                                | 108.6       | C11-C12-H12B                           | 109.3       |
| C2-C1-S1                                | 108.40(12)  | C11-C12-C13                            | 111.41(14)  |
| C2-C1-H1                                | 108.6       | H12A-C12-H12B                          | 108.0       |
| C2-C1-C6                                | 110.80(14)  | C13-C12-H12A                           | 109.3       |
| C6-C1-S1                                | 111.90(13)  | C13-C12-H12B                           | 109.3       |
| C6-C1-H1                                | 108.6       | C12-C13-H13A                           | 109.4       |
| C1-C2-H2A                               | 109.1       | C12-C13-H13B                           | 109.4       |
| C1-C2-H2B                               | 109.1       | H13A-C13-H13B                          | 108.0       |
| H2A-C2-H2B                              | 107.8       | C14-C13-C12                            | 111.07(15)  |
| C3-C2-C1                                | 112.70(14)  | C14-C13-H13A                           | 109.4       |
| C3-C2-H2A                               | 109.1       | C14-C13-H13B                           | 109.4       |
| C3-C2-H2B                               | 109.1       | C13-C14-H14A                           | 109.5       |
| C2-C3-H3A                               | 109.3       | C13-C14-H14B                           | 109.5       |
| C2-C3-H3B                               | 109.3       | C13-C14-C15                            | 110.87(17)  |
| H3A-C3-H3B                              | 108.0       | H14A-C14-H14B                          | 108.1       |
| C4-C3-C2                                | 111.64(17)  | C15-C14-H14A                           | 109.5       |
| C4-C3-H3A                               | 109.3       | C15-C14-H14B                           | 109.5       |
| C4-C3-H3B                               | 109.3       | C14-C15-H15A                           | 109.4       |
| C3-C4-H4A                               | 109.4       | C14-C15-H15B                           | 109.4       |
| C3-C4-H4B                               | 109.4       | C14-C15-C16                            | 111.12(16)  |
| C3-C4-C5                                | 111.13(15)  | H15A-C15-H15B                          | 108.0       |
| H4A-C4-H4B                              | 108.0       | C16-C15-H15A                           | 109.4       |
| C5-C4-H4A                               | 109.4       | C16-C15-H15B                           | 109.4       |
| C5-C4-H4B                               | 109.4       | C11-C16-C15                            | 110.80(15)  |
| C4-C5-H5A                               | 109.5       | C11-C16-H16A                           | 109.5       |
| C4-C5-H5B                               | 109.5       | C11-C16-H16B                           | 109.5       |
| C4-C5-C6                                | 110.84(17)  | C15-C16-H16A                           | 109.5       |
| H5A-C5-H5B                              | 108.1       | C15-C16-H16B                           | 109.5       |
| C6-C5-H5A                               | 109.5       | H16A-C16-H16B                          | 108.1       |
| C6-C5-H5B                               | 109.5       | Cu2-I2-Cu3                             | 68.570(11)  |
| C1-C6-H6A                               | 109.1       | I2-Cu2-I2 <sup>#3</sup>                | 111.788(14) |
| C1-C6-H6B                               | 109.1       | I2-Cu2-Cu3                             | 55.894(7)   |
| C5-C6-C1                                | 112.62(16)  | I2 <sup>#3</sup> -Cu2-Cu3              | 55.895(7)   |
| C5-C6-H6A                               | 109.1       | S3 <sup>#3</sup> -Cu2-I2               | 111.327(11) |
| C5-C6-H6B                               | 109.1       | S3-Cu2-I2                              | 107.351(12) |
| H6A-C6-H6B                              | 107.8       | S3 <sup>#3</sup> -Cu2-I2 <sup>#3</sup> | 107.349(12) |
| S1-C7-H7A                               | 109.0       | S3-Cu2-I2 <sup>#3</sup>                | 111.325(12) |
| S1-C7-H7B                               | 109.0       | S3 <sup>#3</sup> -Cu2-Cu3              | 126.171(14) |
| H7A-C7-H7B                              | 107.8       | S3-Cu2-Cu3                             | 126.172(14) |
| C8-C7-S1                                | 113.02(11)  | S3-Cu2-S3 <sup>#3</sup>                | 107.66(3)   |
| C8-C7-H7A                               | 109.0       | I2-Cu3-I2 <sup>#3</sup>                | 111.074(14) |
| C8-C7-H7B                               | 109.0       | I2 <sup>#3</sup> -Cu3-Cu2              | 55.538(7)   |
| C9-C8-C7                                | 176.39(17)  | I2-Cu3-Cu2                             | 55.536(7)   |
| C8-C9-C10                               | 178.31(18)  | S4 <sup>#3</sup> -Cu3-I2               | 107.739(13) |
| S2-C10-H10A                             | 109.1       | S4 <sup>#3</sup> -Cu3-I2 <sup>#3</sup> | 110.792(12) |

|                           |             |               |            |
|---------------------------|-------------|---------------|------------|
| S4–Cu3–I2                 | 110.791(12) | C24–C23–S3    | 113.19(14) |
| S4–Cu3–I2 <sup>#3</sup>   | 107.737(13) | C24–C23–H23A  | 108.9      |
| S4 <sup>#3</sup> –Cu3–Cu2 | 125.652(15) | C24–C23–H23B  | 108.9      |
| S4–Cu3–Cu2                | 125.650(15) | C25–C24–C23   | 175.3(2)   |
| S4 <sup>#3</sup> –Cu3–S4  | 108.70(3)   | C24–C25–C26   | 173.6(2)   |
| C17–S3–Cu2                | 104.53(6)   | S4–C26–H26A   | 109.2      |
| C17–S3–C23                | 102.35(9)   | S4–C26–H26B   | 109.2      |
| C23–S3–Cu2                | 104.49(7)   | C25–C26–S4    | 112.11(13) |
| C26–S4–Cu3                | 104.82(7)   | C25–C26–H26A  | 109.2      |
| C27–S4–Cu3                | 101.62(6)   | C25–C26–H26B  | 109.2      |
| C27–S4–C26                | 102.32(10)  | H26A–C26–H26B | 107.9      |
| S3–C17–H17                | 108.6       | S4–C27–H27    | 108.1      |
| C18–C17–S3                | 107.07(12)  | C28–C27–S4    | 114.76(15) |
| C18–C17–H17               | 108.6       | C28–C27–H27   | 108.1      |
| C18–C17–C22               | 111.06(15)  | C28–C27–C32   | 110.98(17) |
| C22–C17–S3                | 112.75(12)  | C32–C27–S4    | 106.62(13) |
| C22–C17–H17               | 108.6       | C32–C27–H27   | 108.1      |
| C17–C18–H18A              | 109.6       | C27–C28–H28A  | 109.8      |
| C17–C18–H18B              | 109.6       | C27–C28–H28B  | 109.8      |
| C17–C18–C19               | 110.22(16)  | C27–C28–C29   | 109.23(19) |
| H18A–C18–H18B             | 108.1       | H28A–C28–H28B | 108.3      |
| C19–C18–H18A              | 109.6       | C29–C28–H28A  | 109.8      |
| C19–C18–H18B              | 109.6       | C29–C28–H28B  | 109.8      |
| C18–C19–H19A              | 109.4       | C28–C29–H29A  | 109.3      |
| C18–C19–H19B              | 109.4       | C28–C29–H29B  | 109.3      |
| H19A–C19–H19B             | 108.0       | H29A–C29–H29B | 107.9      |
| C20–C19–C18               | 111.18(18)  | C30–C29–C28   | 111.7(2)   |
| C20–C19–H19A              | 109.4       | C30–C29–H29A  | 109.3      |
| C20–C19–H19B              | 109.4       | C30–C29–H29B  | 109.3      |
| C19–C20–H20A              | 109.4       | C29–C30–H30A  | 109.5      |
| C19–C20–H20B              | 109.4       | C29–C30–H30B  | 109.5      |
| H20A–C20–H20B             | 108.0       | H30A–C30–H30B | 108.1      |
| C21–C20–C19               | 111.26(18)  | C31–C30–C29   | 110.8(2)   |
| C21–C20–H20A              | 109.4       | C31–C30–H30A  | 109.5      |
| C21–C20–H20B              | 109.4       | C31–C30–H30B  | 109.5      |
| C20–C21–H21A              | 109.4       | C30–C31–H31A  | 109.1      |
| C20–C21–H21B              | 109.4       | C30–C31–H31B  | 109.1      |
| C20–C21–C22               | 111.23(18)  | C30–C31–C32   | 112.5(3)   |
| H21A–C21–H21B             | 108.0       | H31A–C31–H31B | 107.8      |
| C22–C21–H21A              | 109.4       | C32–C31–H31A  | 109.1      |
| C22–C21–H21B              | 109.4       | C32–C31–H31B  | 109.1      |
| C17–C22–H22A              | 109.7       | C27–C32–C31   | 110.14(19) |
| C17–C22–H22B              | 109.7       | C27–C32–H32A  | 109.6      |
| C21–C22–C17               | 110.02(15)  | C27–C32–H32B  | 109.6      |
| C21–C22–H22A              | 109.7       | C31–C32–H32A  | 109.6      |
| C21–C22–H22B              | 109.7       | C31–C32–H32B  | 109.6      |
| H22A–C22–H22B             | 108.2       | H32A–C32–H32B | 108.1      |
| S3–C23–H23A               | 108.9       |               |            |
| S3–C23–H23B               | 108.9       |               |            |
| H23A–C23–H23B             | 107.8       |               |            |

Symmetry transformations used to generate equivalent atoms:  
#1: 0.5-X, 1.5-Y, 1-Z; #2: 0.5-X, 0.5-Y, 1-Z; #3: 1-X, +Y, 1.5-Z;

**Table S33. Torsion angles for CP2D1\_220K**

| Atom–Atom–Atom–<br>Atom     | Torsion Angle [°] |                             |             |
|-----------------------------|-------------------|-----------------------------|-------------|
| Cu1 <sup>#1</sup> –S1–C1–C2 | –59.25(12)        | Cu1 <sup>#1</sup> –S1–C7–C8 | –60.96(12)  |
| Cu1 <sup>#1</sup> –S1–C1–C6 | 178.27(11)        | Cu1–S2–C10–C9               | –176.90(10) |
|                             |                   | Cu1–S2–C11–C12              | –40.65(12)  |
|                             |                   | Cu1–S2–C11–C16              | 82.76(11)   |

|                 |             |                 |             |
|-----------------|-------------|-----------------|-------------|
| S1-C1-C2-C3     | -71.38(17)  | Cu3-S4-C27-C32  | -75.96(15)  |
| S1-C1-C6-C5     | 68.57(19)   | S3-C17-C18-C19  | 179.37(14)  |
| S2-C11-C12-C13  | 173.77(12)  | S3-C17-C22-C21  | 177.77(14)  |
| S2-C11-C16-C15  | -177.04(14) | S4-C27-C28-C29  | 179.34(15)  |
| C1-S1-C7-C8     | 54.52(13)   | S4-C27-C32-C31  | 177.4(2)    |
| C1-C2-C3-C4     | -54.0(2)    | C17-S3-C23-C24  | 59.13(15)   |
| C2-C1-C6-C5     | -52.5(2)    | C17-C18-C19-C20 | 55.8(3)     |
| C2-C3-C4-C5     | 55.9(2)     | C18-C17-C22-C21 | 57.6(2)     |
| C3-C4-C5-C6     | -56.2(2)    | C18-C19-C20-C21 | -55.5(3)    |
| C4-C5-C6-C1     | 55.2(2)     | C19-C20-C21-C22 | 56.1(3)     |
| C6-C1-C2-C3     | 51.8(2)     | C20-C21-C22-C17 | -56.8(2)    |
| C7-S1-C1-C2     | -170.45(11) | C22-C17-C18-C19 | -57.1(2)    |
| C7-S1-C1-C6     | 67.06(14)   | C23-S3-C17-C18  | -177.76(13) |
| C10-S2-C11-C12  | 69.55(12)   | C23-S3-C17-C22  | 59.79(15)   |
| C10-S2-C11-C16  | -167.05(12) | C26-S4-C27-C28  | 52.54(17)   |
| C11-S2-C10-C9   | 68.00(13)   | C26-S4-C27-C32  | 175.84(16)  |
| C11-C12-C13-C14 | -54.6(2)    | C27-S4-C26-C25  | 55.17(17)   |
| C12-C11-C16-C15 | -53.7(2)    | C27-C28-C29-C30 | -57.9(3)    |
| C12-C13-C14-C15 | 56.9(2)     | C28-C27-C32-C31 | -56.9(3)    |
| C13-C14-C15-C16 | -57.5(2)    | C28-C29-C30-C31 | 55.8(4)     |
| C14-C15-C16-C11 | 55.6(2)     | C29-C30-C31-C32 | -54.2(4)    |
| C16-C11-C12-C13 | 53.44(19)   | C30-C31-C32-C27 | 54.7(4)     |
| Cu2-S3-C17-C18  | -69.02(12)  | C32-C27-C28-C29 | 58.4(2)     |
| Cu2-S3-C17-C22  | 168.54(12)  |                 |             |
| Cu2-S3-C23-C24  | -49.64(15)  |                 |             |
| Cu3-S4-C26-C25  | -50.56(16)  |                 |             |
| Cu3-S4-C27-C28  | 160.74(14)  |                 |             |

Symmetry transformations used to generate equivalent atoms:  
#1: 0.5-X, 0.5-Y, 1-Z;



## Crystal Data and Experimental

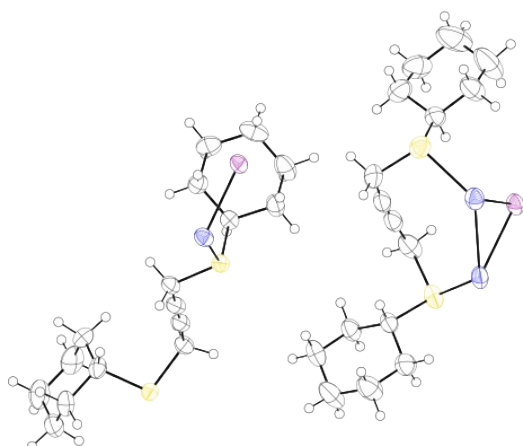

**Experimental:** The data for CP2D1\_260K were collected from a shock-cooled single crystal at 260.0(1) K on a Bruker D8 Venture CMOS with Photon 2 four-circle diffractometer with a X-ray tube using a graphite as monochromator and a CPAD PHOTON II area detector detector. The diffractometer was equipped with an Oxford Cryostream 800 low temperature device and used Mo  $K_{\alpha}$  radiation ( $\lambda = 0.71073 \text{ \AA}$ ). All data were integrated with SAINT V8.38A and a multi-scan absorption correction using SADABS 2016/2 was applied.<sup>[1,2]</sup> The structure was solved by direct methods with ShelXT and refined by full-matrix least-squares methods against  $F^2$  using SHELXL.<sup>[3,4]</sup> All non-hydrogen atoms were refined with anisotropic displacement parameters. The hydrogen atoms were refined isotropically on calculated positions using a riding model with their  $U_{iso}$  values constrained to 1.5 times the  $U_{eq}$  of their pivot atoms for terminal  $sp^3$  carbon atoms and 1.2 times for all other carbon atoms. Crystallographic data for the structures reported in this paper have been deposited with the Cambridge Crystallographic Data Centre.<sup>[5]</sup> CCDC 2326505 contain the supplementary crystallographic data for this paper. These data can be obtained free of charge from The Cambridge Crystallographic Data Centre via [www.ccdc.cam.ac.uk/structures](http://www.ccdc.cam.ac.uk/structures). This report and the CIF file were generated using FinalCif.<sup>[6]</sup>

**Table S34.** Crystal data and structure refinement for CP2D1\_260K

|                                           |                                                                      |
|-------------------------------------------|----------------------------------------------------------------------|
| Internal Reference                        | CP2D1_260K                                                           |
| CCDC number                               | 2326505                                                              |
| Empirical formula                         | $C_{16}H_{26}CuS_2$                                                  |
| Formula weight                            | 472.93                                                               |
| Temperature [K]                           | 260.0(1)                                                             |
| Crystal system                            | monoclinic                                                           |
| Space group (number)                      | $C2/c$ (15)                                                          |
| $a$ [Å]                                   | 31.932(2)                                                            |
| $b$ [Å]                                   | 10.2558(7)                                                           |
| $c$ [Å]                                   | 23.1217(16)                                                          |
| $\alpha$ [°]                              | 90                                                                   |
| $\beta$ [°]                               | 96.952(3)                                                            |
| $\gamma$ [°]                              | 90                                                                   |
| Volume [Å <sup>3</sup> ]                  | 7516.5(9)                                                            |
| $Z$                                       | 16                                                                   |
| $\rho_{calc}$ [gcm <sup>-3</sup> ]        | 1.672                                                                |
| $\mu$ [mm <sup>-1</sup> ]                 | 3.017                                                                |
| $F(000)$                                  | 3776                                                                 |
| Crystal size [mm <sup>3</sup> ]           | 0.247×0.279×0.481                                                    |
| Crystal colour                            | clear light yellow                                                   |
| Crystal shape                             | block                                                                |
| Radiation                                 | Mo $K_{\alpha}$ ( $\lambda=0.71073 \text{ \AA}$ )                    |
| $2\theta$ range [°]                       | 5.67 to 55.00 (0.77 Å)                                               |
| Index ranges                              | $-41 \leq h \leq 41$<br>$-13 \leq k \leq 13$<br>$-30 \leq l \leq 30$ |
| Reflections collected                     | 67034                                                                |
| Independent reflections                   | 8597<br>$R_{int} = 0.0242$<br>$R_{sigma} = 0.0151$                   |
| Completeness to $\theta = 25.242^\circ$   | 99.6 %                                                               |
| Data / Restraints / Parameters            | 8597 / 0 / 362                                                       |
| Goodness-of-fit on $F^2$                  | 1.124                                                                |
| Final $R$ indexes [ $I \geq 2\sigma(I)$ ] | $R_1 = 0.0177$<br>$wR_2 = 0.0432$                                    |
| Final $R$ indexes [all data]              | $R_1 = 0.0189$<br>$wR_2 = 0.0438$                                    |
| Largest peak/hole [eÅ <sup>-3</sup> ]     | 0.59/-0.49                                                           |



**Table S35. Bond lengths and angles for CP2D1\_260K**

| <b>Atom–Atom</b>      | <b>Length [Å]</b> |                                         |                  |
|-----------------------|-------------------|-----------------------------------------|------------------|
| II–Cu1                | 2.6341(3)         | Cu2–S3 <sup>#3</sup>                    | 2.3421(5)        |
| II–Cu1 <sup>#1</sup>  | 2.6679(3)         | Cu3–S4                                  | 2.3586(6)        |
| Cu1–Cu1 <sup>#1</sup> | 2.9000(5)         | Cu3–S4 <sup>#3</sup>                    | 2.3586(6)        |
| Cu1–S1 <sup>#2</sup>  | 2.3526(5)         | S3–C17                                  | 1.8246(18)       |
| Cu1–S2                | 2.3264(5)         | S3–C23                                  | 1.825(2)         |
| S1–C1                 | 1.8365(17)        | S4–C26                                  | 1.829(2)         |
| S1–C7                 | 1.8230(17)        | S4–C27                                  | 1.826(2)         |
| S2–C10                | 1.8203(17)        | C17–H17                                 | 0.9800           |
| S2–C11                | 1.8303(17)        | C17–C18                                 | 1.517(3)         |
| C1–H1                 | 0.9800            | C17–C22                                 | 1.524(2)         |
| C1–C2                 | 1.513(3)          | C18–H18A                                | 0.9700           |
| C1–C6                 | 1.523(3)          | C18–H18B                                | 0.9700           |
| C2–H2A                | 0.9700            | C18–C19                                 | 1.531(3)         |
| C2–H2B                | 0.9700            | C19–H19A                                | 0.9700           |
| C2–C3                 | 1.512(3)          | C19–H19B                                | 0.9700           |
| C3–H3A                | 0.9700            | C19–C20                                 | 1.511(3)         |
| C3–H3B                | 0.9700            | C20–H20A                                | 0.9700           |
| C3–C4                 | 1.503(3)          | C20–H20B                                | 0.9700           |
| C4–H4A                | 0.9700            | C20–C21                                 | 1.503(4)         |
| C4–H4B                | 0.9700            | C21–H21A                                | 0.9700           |
| C4–C5                 | 1.508(4)          | C21–H21B                                | 0.9700           |
| C5–H5A                | 0.9700            | C21–C22                                 | 1.520(3)         |
| C5–H5B                | 0.9700            | C22–H22A                                | 0.9700           |
| C5–C6                 | 1.518(4)          | C22–H22B                                | 0.9700           |
| C6–H6A                | 0.9700            | C23–H23A                                | 0.9700           |
| C6–H6B                | 0.9700            | C23–H23B                                | 0.9700           |
| C7–H7A                | 0.9700            | C23–C24                                 | 1.453(4)         |
| C7–H7B                | 0.9700            | C24–C25                                 | 1.179(4)         |
| C7–C8                 | 1.457(2)          | C25–C26                                 | 1.446(4)         |
| C8–C9                 | 1.190(3)          | C26–H26A                                | 0.9700           |
| C9–C10                | 1.456(2)          | C26–H26B                                | 0.9700           |
| C10–H10A              | 0.9700            | C27–H27                                 | 0.9800           |
| C10–H10B              | 0.9700            | C27–C28                                 | 1.511(3)         |
| C11–H11               | 0.9800            | C27–C32                                 | 1.517(3)         |
| C11–C12               | 1.521(2)          | C28–H28A                                | 0.9700           |
| C11–C16               | 1.519(2)          | C28–H28B                                | 0.9700           |
| C12–H12A              | 0.9700            | C28–C29                                 | 1.527(4)         |
| C12–H12B              | 0.9700            | C29–H29A                                | 0.9700           |
| C12–C13               | 1.524(3)          | C29–H29B                                | 0.9700           |
| C13–H13A              | 0.9700            | C29–C30                                 | 1.510(4)         |
| C13–H13B              | 0.9700            | C30–H30A                                | 0.9700           |
| C13–C14               | 1.512(3)          | C30–H30B                                | 0.9700           |
| C14–H14A              | 0.9700            | C30–C31                                 | 1.485(5)         |
| C14–H14B              | 0.9700            | C31–H31A                                | 0.9700           |
| C14–C15               | 1.517(4)          | C31–H31B                                | 0.9700           |
| C15–H15A              | 0.9700            | C31–C32                                 | 1.526(4)         |
| C15–H15B              | 0.9700            | C32–H32A                                | 0.9700           |
| C15–C16               | 1.527(3)          | C32–H32B                                | 0.9700           |
| C16–H16A              | 0.9700            |                                         |                  |
| C16–H16B              | 0.9700            | <b>Atom–Atom–Atom</b>                   | <b>Angle [°]</b> |
| I2–Cu2                | 2.6321(3)         | Cu1–II–Cu1 <sup>#1</sup>                | 66.314(9)        |
| I2–Cu3                | 2.6426(3)         | II–Cu1–II <sup>#1</sup>                 | 113.685(9)       |
| Cu2–Cu3               | 2.9628(6)         | II <sup>#1</sup> –Cu1–Cu1 <sup>#1</sup> | 56.282(8)        |
| Cu2–S3                | 2.3421(5)         | II–Cu1–Cu1 <sup>#1</sup>                | 57.404(9)        |
|                       |                   | S1 <sup>#2</sup> –Cu1–II                | 103.039(12)      |

|                                         |             |                                        |             |
|-----------------------------------------|-------------|----------------------------------------|-------------|
| S1 <sup>#2</sup> -Cu1-I1 <sup>#1</sup>  | 102.368(13) | S2-C10-H10B                            | 109.1       |
| S1 <sup>#2</sup> -Cu1-Cu1 <sup>#1</sup> | 113.701(15) | C9-C10-S2                              | 112.34(13)  |
| S2-Cu1-I1 <sup>#1</sup>                 | 108.131(13) | C9-C10-H10A                            | 109.1       |
| S2-Cu1-I1                               | 116.019(14) | C9-C10-H10B                            | 109.1       |
| S2-Cu1-Cu1 <sup>#1</sup>                | 133.215(16) | H10A-C10-H10B                          | 107.9       |
| S2-Cu1-S1 <sup>#2</sup>                 | 112.757(16) | S2-C11-H11                             | 108.4       |
| C1-S1-Cu1 <sup>#2</sup>                 | 111.00(7)   | C12-C11-S2                             | 112.28(12)  |
| C7-S1-Cu1 <sup>#2</sup>                 | 105.54(6)   | C12-C11-H11                            | 108.4       |
| C7-S1-C1                                | 101.11(9)   | C16-C11-S2                             | 106.86(12)  |
| C10-S2-Cu1                              | 104.70(6)   | C16-C11-H11                            | 108.4       |
| C10-S2-C11                              | 100.42(8)   | C16-C11-C12                            | 112.24(15)  |
| C11-S2-Cu1                              | 111.05(6)   | C11-C12-H12A                           | 109.3       |
| S1-C1-H1                                | 108.5       | C11-C12-H12B                           | 109.3       |
| C2-C1-S1                                | 108.71(13)  | C11-C12-C13                            | 111.56(16)  |
| C2-C1-H1                                | 108.5       | H12A-C12-H12B                          | 108.0       |
| C2-C1-C6                                | 110.86(16)  | C13-C12-H12A                           | 109.3       |
| C6-C1-S1                                | 111.81(14)  | C13-C12-H12B                           | 109.3       |
| C6-C1-H1                                | 108.5       | C12-C13-H13A                           | 109.4       |
| C1-C2-H2A                               | 109.1       | C12-C13-H13B                           | 109.4       |
| C1-C2-H2B                               | 109.1       | H13A-C13-H13B                          | 108.0       |
| H2A-C2-H2B                              | 107.8       | C14-C13-C12                            | 111.22(17)  |
| C3-C2-C1                                | 112.67(16)  | C14-C13-H13A                           | 109.4       |
| C3-C2-H2A                               | 109.1       | C14-C13-H13B                           | 109.4       |
| C3-C2-H2B                               | 109.1       | C13-C14-H14A                           | 109.4       |
| C2-C3-H3A                               | 109.2       | C13-C14-H14B                           | 109.4       |
| C2-C3-H3B                               | 109.2       | C13-C14-C15                            | 111.07(19)  |
| H3A-C3-H3B                              | 107.9       | H14A-C14-H14B                          | 108.0       |
| C4-C3-C2                                | 111.92(19)  | C15-C14-H14A                           | 109.4       |
| C4-C3-H3A                               | 109.2       | C15-C14-H14B                           | 109.4       |
| C4-C3-H3B                               | 109.2       | C14-C15-H15A                           | 109.4       |
| C3-C4-H4A                               | 109.4       | C14-C15-H15B                           | 109.4       |
| C3-C4-H4B                               | 109.4       | C14-C15-C16                            | 111.16(18)  |
| C3-C4-C5                                | 111.00(17)  | H15A-C15-H15B                          | 108.0       |
| H4A-C4-H4B                              | 108.0       | C16-C15-H15A                           | 109.4       |
| C5-C4-H4A                               | 109.4       | C16-C15-H15B                           | 109.4       |
| C5-C4-H4B                               | 109.4       | C11-C16-C15                            | 110.84(16)  |
| C4-C5-H5A                               | 109.5       | C11-C16-H16A                           | 109.5       |
| C4-C5-H5B                               | 109.5       | C11-C16-H16B                           | 109.5       |
| C4-C5-C6                                | 110.8(2)    | C15-C16-H16A                           | 109.5       |
| H5A-C5-H5B                              | 108.1       | C15-C16-H16B                           | 109.5       |
| C6-C5-H5A                               | 109.5       | H16A-C16-H16B                          | 108.1       |
| C6-C5-H5B                               | 109.5       | Cu2-I2-Cu3                             | 68.346(11)  |
| C1-C6-H6A                               | 109.1       | I2-Cu2-I2 <sup>#3</sup>                | 111.990(15) |
| C1-C6-H6B                               | 109.1       | I2-Cu2-Cu3                             | 55.994(8)   |
| C5-C6-C1                                | 112.57(18)  | I2 <sup>#3</sup> -Cu2-Cu3              | 55.996(8)   |
| C5-C6-H6A                               | 109.1       | S3 <sup>#3</sup> -Cu2-I2               | 111.293(13) |
| C5-C6-H6B                               | 109.1       | S3-Cu2-I2                              | 107.258(14) |
| H6A-C6-H6B                              | 107.8       | S3 <sup>#3</sup> -Cu2-I2 <sup>#3</sup> | 107.257(14) |
| S1-C7-H7A                               | 109.0       | S3-Cu2-I2 <sup>#3</sup>                | 111.295(13) |
| S1-C7-H7B                               | 109.0       | S3 <sup>#3</sup> -Cu2-Cu3              | 126.149(16) |
| H7A-C7-H7B                              | 107.8       | S3-Cu2-Cu3                             | 126.150(16) |
| C8-C7-S1                                | 113.12(12)  | S3-Cu2-S3 <sup>#3</sup>                | 107.70(3)   |
| C8-C7-H7A                               | 109.0       | I2-Cu3-I2 <sup>#3</sup>                | 111.320(15) |
| C8-C7-H7B                               | 109.0       | I2 <sup>#3</sup> -Cu3-Cu2              | 55.661(8)   |
| C9-C8-C7                                | 176.74(19)  | I2-Cu3-Cu2                             | 55.659(8)   |
| C8-C9-C10                               | 178.20(18)  | S4 <sup>#3</sup> -Cu3-I2               | 107.659(14) |
| S2-C10-H10A                             | 109.1       | S4 <sup>#3</sup> -Cu3-I2 <sup>#3</sup> | 110.848(13) |

|                           |             |               |            |
|---------------------------|-------------|---------------|------------|
| S4–Cu3–I2                 | 110.848(13) | C24–C23–S3    | 113.22(15) |
| S4–Cu3–I2 <sup>#3</sup>   | 107.659(14) | C24–C23–H23A  | 108.9      |
| S4 <sup>#3</sup> –Cu3–Cu2 | 125.756(16) | C24–C23–H23B  | 108.9      |
| S4–Cu3–Cu2                | 125.756(16) | C25–C24–C23   | 175.4(2)   |
| S4 <sup>#3</sup> –Cu3–S4  | 108.49(3)   | C24–C25–C26   | 173.7(2)   |
| C17–S3–Cu2                | 104.63(6)   | S4–C26–H26A   | 109.2      |
| C17–S3–C23                | 102.38(10)  | S4–C26–H26B   | 109.2      |
| C23–S3–Cu2                | 104.46(7)   | C25–C26–S4    | 112.15(15) |
| C26–S4–Cu3                | 104.83(8)   | C25–C26–H26A  | 109.2      |
| C27–S4–Cu3                | 101.88(7)   | C25–C26–H26B  | 109.2      |
| C27–S4–C26                | 102.33(11)  | H26A–C26–H26B | 107.9      |
| S3–C17–H17                | 108.6       | S4–C27–H27    | 107.9      |
| C18–C17–S3                | 107.06(13)  | C28–C27–S4    | 114.83(16) |
| C18–C17–H17               | 108.6       | C28–C27–H27   | 107.9      |
| C18–C17–C22               | 111.12(16)  | C28–C27–C32   | 111.21(19) |
| C22–C17–S3                | 112.78(13)  | C32–C27–S4    | 106.77(15) |
| C22–C17–H17               | 108.6       | C32–C27–H27   | 107.9      |
| C17–C18–H18A              | 109.7       | C27–C28–H28A  | 109.8      |
| C17–C18–H18B              | 109.7       | C27–C28–H28B  | 109.8      |
| C17–C18–C19               | 109.99(18)  | C27–C28–C29   | 109.2(2)   |
| H18A–C18–H18B             | 108.2       | H28A–C28–H28B | 108.3      |
| C19–C18–H18A              | 109.7       | C29–C28–H28A  | 109.8      |
| C19–C18–H18B              | 109.7       | C29–C28–H28B  | 109.8      |
| C18–C19–H19A              | 109.4       | C28–C29–H29A  | 109.3      |
| C18–C19–H19B              | 109.4       | C28–C29–H29B  | 109.3      |
| H19A–C19–H19B             | 108.0       | H29A–C29–H29B | 107.9      |
| C20–C19–C18               | 111.3(2)    | C30–C29–C28   | 111.7(2)   |
| C20–C19–H19A              | 109.4       | C30–C29–H29A  | 109.3      |
| C20–C19–H19B              | 109.4       | C30–C29–H29B  | 109.3      |
| C19–C20–H20A              | 109.4       | C29–C30–H30A  | 109.4      |
| C19–C20–H20B              | 109.4       | C29–C30–H30B  | 109.4      |
| H20A–C20–H20B             | 108.0       | H30A–C30–H30B | 108.0      |
| C21–C20–C19               | 111.3(2)    | C31–C30–C29   | 111.2(3)   |
| C21–C20–H20A              | 109.4       | C31–C30–H30A  | 109.4      |
| C21–C20–H20B              | 109.4       | C31–C30–H30B  | 109.4      |
| C20–C21–H21A              | 109.3       | C30–C31–H31A  | 109.0      |
| C20–C21–H21B              | 109.3       | C30–C31–H31B  | 109.0      |
| C20–C21–C22               | 111.5(2)    | C30–C31–C32   | 112.9(3)   |
| H21A–C21–H21B             | 108.0       | H31A–C31–H31B | 107.8      |
| C22–C21–H21A              | 109.3       | C32–C31–H31A  | 109.0      |
| C22–C21–H21B              | 109.3       | C32–C31–H31B  | 109.0      |
| C17–C22–H22A              | 109.7       | C27–C32–C31   | 110.2(2)   |
| C17–C22–H22B              | 109.7       | C27–C32–H32A  | 109.6      |
| C21–C22–C17               | 109.95(17)  | C27–C32–H32B  | 109.6      |
| C21–C22–H22A              | 109.7       | C31–C32–H32A  | 109.6      |
| C21–C22–H22B              | 109.7       | C31–C32–H32B  | 109.6      |
| H22A–C22–H22B             | 108.2       | H32A–C32–H32B | 108.1      |
| S3–C23–H23A               | 108.9       |               |            |
| S3–C23–H23B               | 108.9       |               |            |
| H23A–C23–H23B             | 107.7       |               |            |

Symmetry transformations used to generate equivalent atoms:  
#1: 0.5-X, 1.5-Y, 1-Z; #2: 0.5-X, 0.5-Y, 1-Z; #3: 1-X, +Y, 1.5-Z;

**Table S36. Torsion angles for CP2D1\_260K**

| Atom–Atom–Atom–<br>Atom     | Torsion Angle [°] |                             |             |
|-----------------------------|-------------------|-----------------------------|-------------|
| Cu1 <sup>#1</sup> –S1–C1–C2 | –58.93(13)        | Cu1 <sup>#1</sup> –S1–C7–C8 | –61.01(13)  |
| Cu1 <sup>#1</sup> –S1–C1–C6 | 178.35(13)        | Cu1–S2–C10–C9               | –176.71(11) |
|                             |                   | Cu1–S2–C11–C12              | –40.69(13)  |
|                             |                   | Cu1–S2–C11–C16              | 82.78(12)   |

|                 |             |                 |             |
|-----------------|-------------|-----------------|-------------|
| S1-C1-C2-C3     | -71.76(19)  | Cu3-S4-C27-C32  | -75.53(17)  |
| S1-C1-C6-C5     | 69.1(2)     | S3-C17-C18-C19  | 179.45(16)  |
| S2-C11-C12-C13  | 173.71(13)  | S3-C17-C22-C21  | 177.58(16)  |
| S2-C11-C16-C15  | -177.20(15) | S4-C27-C28-C29  | 179.51(17)  |
| C1-S1-C7-C8     | 54.69(14)   | S4-C27-C32-C31  | 177.7(2)    |
| C1-C2-C3-C4     | -54.0(2)    | C17-S3-C23-C24  | 59.33(17)   |
| C2-C1-C6-C5     | -52.4(2)    | C17-C18-C19-C20 | 55.8(3)     |
| C2-C3-C4-C5     | 55.9(3)     | C18-C17-C22-C21 | 57.4(2)     |
| C3-C4-C5-C6     | -56.2(3)    | C18-C19-C20-C21 | -55.5(3)    |
| C4-C5-C6-C1     | 55.1(3)     | C19-C20-C21-C22 | 56.1(3)     |
| C6-C1-C2-C3     | 51.5(2)     | C20-C21-C22-C17 | -56.6(3)    |
| C7-S1-C1-C2     | -170.52(12) | C22-C17-C18-C19 | -57.0(2)    |
| C7-S1-C1-C6     | 66.76(15)   | C23-S3-C17-C18  | -177.79(14) |
| C10-S2-C11-C12  | 69.63(13)   | C23-S3-C17-C22  | 59.69(16)   |
| C10-S2-C11-C16  | -166.90(13) | C26-S4-C27-C28  | 52.43(19)   |
| C11-S2-C10-C9   | 68.09(14)   | C26-S4-C27-C32  | 176.19(17)  |
| C11-C12-C13-C14 | -54.3(2)    | C27-S4-C26-C25  | 55.65(19)   |
| C12-C11-C16-C15 | -53.7(2)    | C27-C28-C29-C30 | -57.4(3)    |
| C12-C13-C14-C15 | 56.4(2)     | C28-C27-C32-C31 | -56.4(3)    |
| C13-C14-C15-C16 | -57.2(3)    | C28-C29-C30-C31 | 55.3(4)     |
| C14-C15-C16-C11 | 55.4(3)     | C29-C30-C31-C32 | -53.6(5)    |
| C16-C11-C12-C13 | 53.3(2)     | C30-C31-C32-C27 | 54.1(4)     |
| Cu2-S3-C17-C18  | -69.04(13)  | C32-C27-C28-C29 | 58.1(3)     |
| Cu2-S3-C17-C22  | 168.44(13)  |                 |             |
| Cu2-S3-C23-C24  | -49.56(16)  |                 |             |
| Cu3-S4-C26-C25  | -50.36(18)  |                 |             |
| Cu3-S4-C27-C28  | 160.71(16)  |                 |             |

Symmetry transformations used to generate equivalent atoms:  
#1: 0.5-X, 0.5-Y, 1-Z;



## Crystal Data and Experimental

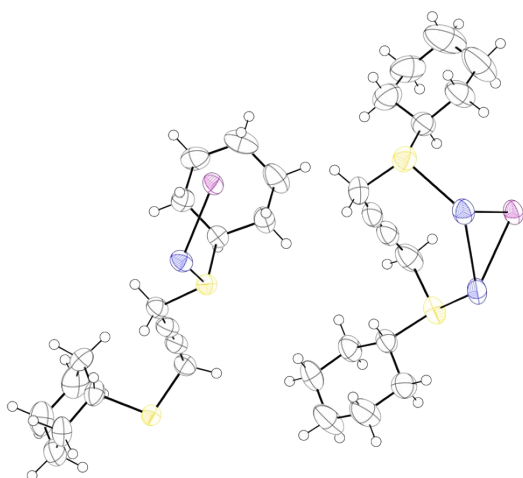

**Experimental:** The data for CP2D1\_300k were collected from a shock-cooled single crystal at 300.0(1) K on a Bruker D8 Venture CMOS with Photon 2 four-circle diffractometer with a X-ray tube using a graphite as monochromator and a CPAD PHOTON II area detector. The diffractometer was equipped with an Oxford Cryostream 800 low temperature device and used Mo  $K_{\alpha}$  radiation ( $\lambda = 0.71073$  Å). All data were integrated with SAINT V8.38A and a multi-scan absorption correction using SADABS 2016/2 was applied. [1,2] The structure was solved by direct methods with ShelXT and refined by full-matrix least-squares methods against  $F^2$  using SHELXL. [3,4] All non-hydrogen atoms were refined with anisotropic displacement parameters. For each compound, some disorders were found in the crystal structure and some geometric parameters of disordered components in each group were restrained by using DELU restraints. For more detail see the .res file included in the cif files. The hydrogen atoms were refined isotropically on calculated positions using a riding model with their  $U_{iso}$  values constrained to 1.5 times the  $U_{eq}$  of their pivot atoms for terminal  $sp^3$  carbon atoms and 1.2 times for all other carbon atoms. Crystallographic data for the structures reported in this paper have been deposited with the Cambridge Crystallographic Data Centre. [5] CCDC 2326506 contain the supplementary crystallographic data for this paper. These data can be obtained free of charge from The Cambridge Crystallographic Data Centre via [www.ccdc.cam.ac.uk/structures](http://www.ccdc.cam.ac.uk/structures). This report and the CIF file were generated using FinalCif. [6]

**Table S37.** Crystal data and structure refinement for CP2D1\_300k

|                                           |                                                                      |
|-------------------------------------------|----------------------------------------------------------------------|
| Internal Reference                        | CP2D1_300k                                                           |
| CCDC number                               | 2326506                                                              |
| Empirical formula                         | $C_{16}H_{26}CuS_2$                                                  |
| Formula weight                            | 472.93                                                               |
| Temperature [K]                           | 300.0(1)                                                             |
| Crystal system                            | monoclinic                                                           |
| Space group (number)                      | $C2/c$ (15)                                                          |
| $a$ [Å]                                   | 31.9681(8)                                                           |
| $b$ [Å]                                   | 10.2932(2)                                                           |
| $c$ [Å]                                   | 23.1990(7)                                                           |
| $\alpha$ [°]                              | 90                                                                   |
| $\beta$ [°]                               | 97.0950(10)                                                          |
| $\gamma$ [°]                              | 90                                                                   |
| Volume [Å <sup>3</sup> ]                  | 7575.3(3)                                                            |
| $Z$                                       | 16                                                                   |
| $\rho_{calc}$ [gcm <sup>-3</sup> ]        | 1.659                                                                |
| $\mu$ [mm <sup>-1</sup> ]                 | 2.994                                                                |
| $F(000)$                                  | 3776                                                                 |
| Crystal size [mm <sup>3</sup> ]           | 0.247×0.279×0.481                                                    |
| Crystal colour                            | clear light yellow                                                   |
| Crystal shape                             | block                                                                |
| Radiation                                 | Mo $K_{\alpha}$ ( $\lambda=0.71073$ Å)                               |
| $2\theta$ range [°]                       | 5.52 to 55.00 (0.77 Å)                                               |
| Index ranges                              | $-41 \leq h \leq 41$<br>$-13 \leq k \leq 13$<br>$-30 \leq l \leq 30$ |
| Reflections collected                     | 72825                                                                |
| Independent reflections                   | 8681<br>$R_{int} = 0.0514$<br>$R_{sigma} = 0.0252$                   |
| Completeness to $\theta = 25.242^\circ$   | 99.7 %                                                               |
| Data / Restraints / Parameters            | 8681 / 12 / 362                                                      |
| Goodness-of-fit on $F^2$                  | 1.041                                                                |
| Final $R$ indexes [ $I \geq 2\sigma(I)$ ] | $R_1 = 0.0198$<br>$wR_2 = 0.0511$                                    |
| Final $R$ indexes [all data]              | $R_1 = 0.0254$<br>$wR_2 = 0.0527$                                    |
| Largest peak/hole [eÅ <sup>-3</sup> ]     | 0.64/-0.32                                                           |

**Table S38. Bond lengths and angles for CP2D1\_300k**

| <b>Atom–Atom</b>      | <b>Length [Å]</b> |                          |                  |
|-----------------------|-------------------|--------------------------|------------------|
| I1–Cu1                | 2.6348(3)         | Cu2–Cu3                  | 2.9564(6)        |
| I1–Cu1 <sup>#1</sup>  | 2.6683(3)         | Cu2–S3                   | 2.3453(6)        |
| Cu1–Cu1 <sup>#1</sup> | 2.9112(5)         | Cu2–S3 <sup>#3</sup>     | 2.3454(6)        |
| Cu1–S1 <sup>#2</sup>  | 2.3577(5)         | Cu3–S4 <sup>#3</sup>     | 2.3609(6)        |
| Cu1–S2                | 2.3298(5)         | Cu3–S4                   | 2.3609(6)        |
| S1–C1                 | 1.833(2)          | S3–C17                   | 1.824(2)         |
| S1–C7                 | 1.825(2)          | S3–C23                   | 1.826(3)         |
| S2–C10                | 1.8189(19)        | S4–C26                   | 1.825(3)         |
| S2–C11                | 1.8320(18)        | S4–C27                   | 1.826(2)         |
| C1–H1                 | 0.9800            | C17–H17                  | 0.9800           |
| C1–C2                 | 1.504(3)          | C17–C18                  | 1.522(3)         |
| C1–C6                 | 1.526(3)          | C17–C22                  | 1.518(3)         |
| C2–H2A                | 0.9700            | C18–H18A                 | 0.9700           |
| C2–H2B                | 0.9700            | C18–H18B                 | 0.9700           |
| C2–C3                 | 1.506(3)          | C18–C19                  | 1.528(4)         |
| C3–H3A                | 0.9700            | C19–H19A                 | 0.9700           |
| C3–H3B                | 0.9700            | C19–H19B                 | 0.9700           |
| C3–C4                 | 1.507(4)          | C19–C20                  | 1.503(4)         |
| C4–H4A                | 0.9700            | C20–H20A                 | 0.9700           |
| C4–H4B                | 0.9700            | C20–H20B                 | 0.9700           |
| C4–C5                 | 1.496(4)          | C20–C21                  | 1.499(4)         |
| C5–H5A                | 0.9700            | C21–H21A                 | 0.9700           |
| C5–H5B                | 0.9700            | C21–H21B                 | 0.9700           |
| C5–C6                 | 1.517(4)          | C21–C22                  | 1.515(3)         |
| C6–H6A                | 0.9700            | C22–H22A                 | 0.9700           |
| C6–H6B                | 0.9700            | C22–H22B                 | 0.9700           |
| C7–H7A                | 0.9700            | C23–H23A                 | 0.9700           |
| C7–H7B                | 0.9700            | C23–H23B                 | 0.9700           |
| C7–C8                 | 1.457(3)          | C23–C24                  | 1.450(4)         |
| C8–C9                 | 1.187(3)          | C24–C25                  | 1.176(4)         |
| C9–C10                | 1.456(3)          | C25–C26                  | 1.445(4)         |
| C10–H10A              | 0.9700            | C26–H26A                 | 0.9700           |
| C10–H10B              | 0.9700            | C26–H26B                 | 0.9700           |
| C11–H11               | 0.9800            | C27–H27                  | 0.9800           |
| C11–C12               | 1.513(3)          | C27–C28                  | 1.501(3)         |
| C11–C16               | 1.517(3)          | C27–C32                  | 1.514(3)         |
| C12–H12A              | 0.9700            | C28–H28A                 | 0.9700           |
| C12–H12B              | 0.9700            | C28–H28B                 | 0.9700           |
| C12–C13               | 1.525(3)          | C28–C29                  | 1.531(4)         |
| C13–H13A              | 0.9700            | C29–H29A                 | 0.9700           |
| C13–H13B              | 0.9700            | C29–H29B                 | 0.9700           |
| C13–C14               | 1.503(4)          | C29–C30                  | 1.508(5)         |
| C14–H14A              | 0.9700            | C30–H30A                 | 0.9700           |
| C14–H14B              | 0.9700            | C30–H30B                 | 0.9700           |
| C14–C15               | 1.517(4)          | C30–C31                  | 1.466(5)         |
| C15–H15A              | 0.9700            | C31–H31A                 | 0.9700           |
| C15–H15B              | 0.9700            | C31–H31B                 | 0.9700           |
| C15–C16               | 1.527(3)          | C31–C32                  | 1.527(4)         |
| C16–H16A              | 0.9700            | C32–H32A                 | 0.9700           |
| C16–H16B              | 0.9700            | C32–H32B                 | 0.9700           |
| I2–Cu2                | 2.6338(3)         |                          |                  |
| I2–Cu3                | 2.6438(3)         | <b>Atom–Atom–Atom</b>    | <b>Angle [°]</b> |
|                       |                   | Cu1–I1–Cu1 <sup>#1</sup> | 66.587(10)       |

|                                         |             |                                        |             |
|-----------------------------------------|-------------|----------------------------------------|-------------|
| I1-Cu1-I1 <sup>#1</sup>                 | 113.413(10) | C8-C7-H7B                              | 108.9       |
| I1 <sup>#1</sup> -Cu1-Cu1 <sup>#1</sup> | 56.156(9)   | C9-C8-C7                               | 176.9(2)    |
| I1-Cu1-Cu1 <sup>#1</sup>                | 57.258(8)   | C8-C9-C10                              | 178.4(2)    |
| S1 <sup>#2</sup> -Cu1-I1                | 103.253(14) | S2-C10-H10A                            | 109.1       |
| S1 <sup>#2</sup> -Cu1-I1 <sup>#1</sup>  | 102.296(15) | S2-C10-H10B                            | 109.1       |
| S1 <sup>#2</sup> -Cu1-Cu1 <sup>#1</sup> | 113.746(17) | C9-C10-S2                              | 112.43(15)  |
| S2-Cu1-I1 <sup>#1</sup>                 | 108.262(15) | C9-C10-H10A                            | 109.1       |
| S2-Cu1-I1                               | 116.084(16) | C9-C10-H10B                            | 109.1       |
| S2-Cu1-Cu1 <sup>#1</sup>                | 133.249(17) | H10A-C10-H10B                          | 107.9       |
| S2-Cu1-S1 <sup>#2</sup>                 | 112.666(18) | S2-C11-H11                             | 108.3       |
| C1-S1-Cu1 <sup>#2</sup>                 | 111.10(7)   | C12-C11-S2                             | 112.41(13)  |
| C7-S1-Cu1 <sup>#2</sup>                 | 105.72(6)   | C12-C11-H11                            | 108.3       |
| C7-S1-C1                                | 101.26(10)  | C12-C11-C16                            | 112.34(18)  |
| C10-S2-Cu1                              | 104.74(7)   | C16-C11-S2                             | 106.92(13)  |
| C10-S2-C11                              | 100.40(9)   | C16-C11-H11                            | 108.3       |
| C11-S2-Cu1                              | 111.05(6)   | C11-C12-H12A                           | 109.3       |
| S1-C1-H1                                | 108.4       | C11-C12-H12B                           | 109.3       |
| C2-C1-S1                                | 109.02(15)  | C11-C12-C13                            | 111.70(18)  |
| C2-C1-H1                                | 108.4       | H12A-C12-H12B                          | 107.9       |
| C2-C1-C6                                | 110.65(18)  | C13-C12-H12A                           | 109.3       |
| C6-C1-S1                                | 111.85(17)  | C13-C12-H12B                           | 109.3       |
| C6-C1-H1                                | 108.4       | C12-C13-H13A                           | 109.4       |
| C1-C2-H2A                               | 109.0       | C12-C13-H13B                           | 109.4       |
| C1-C2-H2B                               | 109.0       | H13A-C13-H13B                          | 108.0       |
| C1-C2-C3                                | 112.85(19)  | C14-C13-C12                            | 111.03(19)  |
| H2A-C2-H2B                              | 107.8       | C14-C13-H13A                           | 109.4       |
| C3-C2-H2A                               | 109.0       | C14-C13-H13B                           | 109.4       |
| C3-C2-H2B                               | 109.0       | C13-C14-H14A                           | 109.4       |
| C2-C3-H3A                               | 109.3       | C13-C14-H14B                           | 109.4       |
| C2-C3-H3B                               | 109.3       | C13-C14-C15                            | 111.3(2)    |
| C2-C3-C4                                | 111.7(2)    | H14A-C14-H14B                          | 108.0       |
| H3A-C3-H3B                              | 107.9       | C15-C14-H14A                           | 109.4       |
| C4-C3-H3A                               | 109.3       | C15-C14-H14B                           | 109.4       |
| C4-C3-H3B                               | 109.3       | C14-C15-H15A                           | 109.5       |
| C3-C4-H4A                               | 109.5       | C14-C15-H15B                           | 109.5       |
| C3-C4-H4B                               | 109.5       | C14-C15-C16                            | 110.9(2)    |
| H4A-C4-H4B                              | 108.1       | H15A-C15-H15B                          | 108.0       |
| C5-C4-C3                                | 110.8(2)    | C16-C15-H15A                           | 109.5       |
| C5-C4-H4A                               | 109.5       | C16-C15-H15B                           | 109.5       |
| C5-C4-H4B                               | 109.5       | C11-C16-C15                            | 110.90(18)  |
| C4-C5-H5A                               | 109.5       | C11-C16-H16A                           | 109.5       |
| C4-C5-H5B                               | 109.5       | C11-C16-H16B                           | 109.5       |
| C4-C5-C6                                | 110.9(2)    | C15-C16-H16A                           | 109.5       |
| H5A-C5-H5B                              | 108.0       | C15-C16-H16B                           | 109.5       |
| C6-C5-H5A                               | 109.5       | H16A-C16-H16B                          | 108.0       |
| C6-C5-H5B                               | 109.5       | Cu2-I2-Cu3                             | 68.138(12)  |
| C1-C6-H6A                               | 109.1       | I2 <sup>#3</sup> -Cu2-I2               | 112.182(17) |
| C1-C6-H6B                               | 109.1       | I2 <sup>#3</sup> -Cu2-Cu3              | 56.091(8)   |
| C5-C6-C1                                | 112.4(2)    | I2-Cu2-Cu3                             | 56.091(8)   |
| C5-C6-H6A                               | 109.1       | S3 <sup>#3</sup> -Cu2-I2 <sup>#3</sup> | 107.134(15) |
| C5-C6-H6B                               | 109.1       | S3-Cu2-I2 <sup>#3</sup>                | 111.326(15) |
| H6A-C6-H6B                              | 107.9       | S3 <sup>#3</sup> -Cu2-I2               | 111.327(14) |
| S1-C7-H7A                               | 108.9       | S3-Cu2-I2                              | 107.137(15) |
| S1-C7-H7B                               | 108.9       | S3 <sup>#3</sup> -Cu2-Cu3              | 126.158(18) |
| H7A-C7-H7B                              | 107.7       | S3-Cu2-Cu3                             | 126.158(18) |
| C8-C7-S1                                | 113.25(14)  | S3-Cu2-S3 <sup>#3</sup>                | 107.68(4)   |
| C8-C7-H7A                               | 108.9       | I2 <sup>#3</sup> -Cu3-I2               | 111.540(17) |



|                                        |             |               |            |
|----------------------------------------|-------------|---------------|------------|
| I2–Cu3–Cu2                             | 55.771(8)   | S3–C23–H23B   | 108.9      |
| I2 <sup>#3</sup> –Cu3–Cu2              | 55.770(8)   | H23A–C23–H23B | 107.7      |
| S4–Cu3–I2 <sup>#3</sup>                | 107.642(16) | C24–C23–S3    | 113.35(17) |
| S4–Cu3–I2                              | 110.844(15) | C24–C23–H23A  | 108.9      |
| S4 <sup>#3</sup> –Cu3–I2 <sup>#3</sup> | 110.846(15) | C24–C23–H23B  | 108.9      |
| S4 <sup>#3</sup> –Cu3–I2               | 107.638(16) | C25–C24–C23   | 175.7(2)   |
| S4–Cu3–Cu2                             | 125.850(18) | C24–C25–C26   | 173.5(3)   |
| S4 <sup>#3</sup> –Cu3–Cu2              | 125.850(18) | S4–C26–H26A   | 109.1      |
| S4–Cu3–S4 <sup>#3</sup>                | 108.30(4)   | S4–C26–H26B   | 109.1      |
| C17–S3–Cu2                             | 104.76(7)   | C25–C26–S4    | 112.42(17) |
| C17–S3–C23                             | 102.26(11)  | C25–C26–H26A  | 109.1      |
| C23–S3–Cu2                             | 104.53(9)   | C25–C26–H26B  | 109.1      |
| C26–S4–Cu3                             | 104.68(9)   | H26A–C26–H26B | 107.9      |
| C26–S4–C27                             | 102.35(12)  | S4–C27–H27    | 107.8      |
| C27–S4–Cu3                             | 102.36(8)   | C28–C27–S4    | 115.1(2)   |
| S3–C17–H17                             | 108.5       | C28–C27–H27   | 107.8      |
| C18–C17–S3                             | 107.27(16)  | C28–C27–C32   | 111.1(2)   |
| C18–C17–H17                            | 108.5       | C32–C27–S4    | 106.97(16) |
| C22–C17–S3                             | 113.00(15)  | C32–C27–H27   | 107.8      |
| C22–C17–H17                            | 108.5       | C27–C28–H28A  | 109.8      |
| C22–C17–C18                            | 110.98(19)  | C27–C28–H28B  | 109.8      |
| C17–C18–H18A                           | 109.7       | C27–C28–C29   | 109.3(3)   |
| C17–C18–H18B                           | 109.7       | H28A–C28–H28B | 108.3      |
| C17–C18–C19                            | 109.7(2)    | C29–C28–H28A  | 109.8      |
| H18A–C18–H18B                          | 108.2       | C29–C28–H28B  | 109.8      |
| C19–C18–H18A                           | 109.7       | C28–C29–H29A  | 109.3      |
| C19–C18–H18B                           | 109.7       | C28–C29–H29B  | 109.3      |
| C18–C19–H19A                           | 109.4       | H29A–C29–H29B | 107.9      |
| C18–C19–H19B                           | 109.4       | C30–C29–C28   | 111.7(3)   |
| H19A–C19–H19B                          | 108.0       | C30–C29–H29A  | 109.3      |
| C20–C19–C18                            | 111.4(2)    | C30–C29–H29B  | 109.3      |
| C20–C19–H19A                           | 109.4       | C29–C30–H30A  | 109.2      |
| C20–C19–H19B                           | 109.4       | C29–C30–H30B  | 109.2      |
| C19–C20–H20A                           | 109.3       | H30A–C30–H30B | 107.9      |
| C19–C20–H20B                           | 109.3       | C31–C30–C29   | 112.1(3)   |
| H20A–C20–H20B                          | 108.0       | C31–C30–H30A  | 109.2      |
| C21–C20–C19                            | 111.5(2)    | C31–C30–H30B  | 109.2      |
| C21–C20–H20A                           | 109.3       | C30–C31–H31A  | 109.0      |
| C21–C20–H20B                           | 109.3       | C30–C31–H31B  | 109.0      |
| C20–C21–H21A                           | 109.4       | C30–C31–C32   | 113.1(4)   |
| C20–C21–H21B                           | 109.4       | H31A–C31–H31B | 107.8      |
| C20–C21–C22                            | 111.3(2)    | C32–C31–H31A  | 109.0      |
| H21A–C21–H21B                          | 108.0       | C32–C31–H31B  | 109.0      |
| C22–C21–H21A                           | 109.4       | C27–C32–C31   | 110.7(2)   |
| C22–C21–H21B                           | 109.4       | C27–C32–H32A  | 109.5      |
| C17–C22–H22A                           | 109.6       | C27–C32–H32B  | 109.5      |
| C17–C22–H22B                           | 109.6       | C31–C32–H32A  | 109.5      |
| C21–C22–C17                            | 110.29(19)  | C31–C32–H32B  | 109.5      |
| C21–C22–H22A                           | 109.6       | H32A–C32–H32B | 108.1      |
| C21–C22–H22B                           | 109.6       |               |            |
| H22A–C22–H22B                          | 108.1       |               |            |
| S3–C23–H23A                            | 108.9       |               |            |

Symmetry transformations used to generate equivalent atoms:  
#1: 0.5-X, 1.5-Y, 1-Z; #2: 0.5-X, 0.5-Y, 1-Z; #3: 1-X, +Y, 1.5-Z;

**Table S39. Torsion angles for CP2D1\_300k**

| Atom–Atom–Atom–<br>Atom     | Torsion Angle [°] |  |            |
|-----------------------------|-------------------|--|------------|
| Cu1 <sup>#1</sup> –S1–C1–C2 |                   |  | –58.78(15) |
| Cu1 <sup>#1</sup> –S1–C1–C6 |                   |  | 178.54(15) |

|                             |             |                 |             |
|-----------------------------|-------------|-----------------|-------------|
| Cu1 <sup>#1</sup> -S1-C7-C8 | -61.27(15)  | Cu3-S4-C26-C25  | -50.4(2)    |
| Cu1-S2-C10-C9               | -176.19(12) | Cu3-S4-C27-C28  | 160.87(18)  |
| Cu1-S2-C11-C12              | -40.67(15)  | Cu3-S4-C27-C32  | -75.12(19)  |
| Cu1-S2-C11-C16              | 83.05(15)   | S3-C17-C18-C19  | 179.29(18)  |
| S1-C1-C2-C3                 | -71.6(2)    | S3-C17-C22-C21  | 177.89(18)  |
| S1-C1-C6-C5                 | 69.4(3)     | S4-C27-C28-C29  | 179.82(19)  |
| S2-C11-C12-C13              | 173.94(15)  | S4-C27-C32-C31  | 177.6(3)    |
| S2-C11-C16-C15              | -177.35(18) | C17-S3-C23-C24  | 60.1(2)     |
| C1-S1-C7-C8                 | 54.67(16)   | C17-C18-C19-C20 | 55.9(3)     |
| C1-C2-C3-C4                 | -54.4(3)    | C18-C17-C22-C21 | 57.3(3)     |
| C2-C1-C6-C5                 | -52.3(3)    | C18-C19-C20-C21 | -55.9(4)    |
| C2-C3-C4-C5                 | 56.2(3)     | C19-C20-C21-C22 | 56.0(4)     |
| C3-C4-C5-C6                 | -56.5(3)    | C20-C21-C22-C17 | -56.5(3)    |
| C4-C5-C6-C1                 | 55.3(3)     | C22-C17-C18-C19 | -56.8(3)    |
| C6-C1-C2-C3                 | 51.8(3)     | C23-S3-C17-C18  | -177.82(16) |
| C7-S1-C1-C2                 | -170.67(14) | C23-S3-C17-C22  | 59.53(19)   |
| C7-S1-C1-C6                 | 66.64(18)   | C26-S4-C27-C28  | 52.6(2)     |
| C10-S2-C11-C12              | 69.68(16)   | C26-S4-C27-C32  | 176.6(2)    |
| C10-S2-C11-C16              | -166.59(15) | C27-S4-C26-C25  | 56.1(2)     |
| C11-S2-C10-C9               | 68.59(15)   | C27-C28-C29-C30 | -56.8(4)    |
| C11-C12-C13-C14             | -54.4(3)    | C28-C27-C32-C31 | -56.0(4)    |
| C12-C11-C16-C15             | -53.6(3)    | C28-C29-C30-C31 | 54.3(5)     |
| C12-C13-C14-C15             | 56.4(3)     | C29-C30-C31-C32 | -52.2(5)    |
| C13-C14-C15-C16             | -57.1(3)    | C30-C31-C32-C27 | 52.9(5)     |
| C14-C15-C16-C11             | 55.1(3)     | C32-C27-C28-C29 | 58.0(3)     |
| C16-C11-C12-C13             | 53.3(2)     |                 |             |
| Cu2-S3-C17-C18              | -68.99(16)  |                 |             |
| Cu2-S3-C17-C22              | 168.37(15)  |                 |             |
| Cu2-S3-C23-C24              | -48.9(2)    |                 |             |

Symmetry transformations used to generate equivalent atoms:  
#1: 0.5-X, 0.5-Y, 1-Z;



## Crystal Data and Experimental

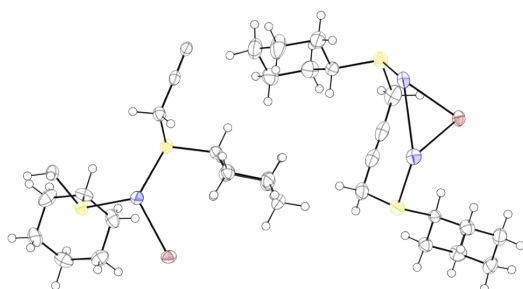

**Experimental:** The data for CP3D2 were collected from a shock-cooled single crystal at 150.0(1) K on a Xcalibur, Sapphire3 four-circle diffractometer with a X-ray tube using a graphite as monochromator and a CCD area detector. The diffractometer used  $\text{MoK}_\alpha$  radiation ( $\lambda = 0.71073 \text{ \AA}$ ). All data were integrated with CrysAlis and a multi-scan absorption correction using SCALE3 ABSPACK was applied.<sup>[7]</sup> The structure was solved by direct methods with SHELXS97 and refined by full-matrix least-squares methods against  $F^2$  using SHELXL.<sup>[3,4]</sup> All non-hydrogen atoms were refined with anisotropic displacement parameters. The hydrogen atoms were refined isotropically on calculated positions using a riding model with their  $U_{\text{iso}}$  values constrained to 1.5 times the  $U_{\text{eq}}$  of their pivot atoms for terminal  $\text{sp}^3$  carbon atoms and 1.2 times for all other carbon atoms. Crystallographic data for the structures reported in this paper have been deposited with the Cambridge Crystallographic Data Centre.<sup>[5]</sup> CCDC 2326258 contain the supplementary crystallographic data for this paper. These data can be obtained free of charge from The Cambridge Crystallographic Data Centre via [www.ccdc.cam.ac.uk/structures](http://www.ccdc.cam.ac.uk/structures). This report and the CIF file were generated using FinalCif.<sup>[6]</sup>

**Table S40.** Crystal data and structure refinement for CP3D2

|                                                 |                                                                      |
|-------------------------------------------------|----------------------------------------------------------------------|
| Internal Reference                              | CP3D2                                                                |
| CCDC number                                     | 2326258                                                              |
| Empirical formula                               | $\text{C}_{16}\text{H}_{26}\text{BrCuS}_2$                           |
| Formula weight                                  | 425.94                                                               |
| Temperature [K]                                 | 150.0(1)                                                             |
| Crystal system                                  | monoclinic                                                           |
| Space group (number)                            | $C2/c$ (15)                                                          |
| $a$ [ $\text{\AA}$ ]                            | 31.366(2)                                                            |
| $b$ [ $\text{\AA}$ ]                            | 10.0042(7)                                                           |
| $c$ [ $\text{\AA}$ ]                            | 22.8146(17)                                                          |
| $\alpha$ [ $^\circ$ ]                           | 90                                                                   |
| $\beta$ [ $^\circ$ ]                            | 96.959(8)                                                            |
| $\gamma$ [ $^\circ$ ]                           | 90                                                                   |
| Volume [ $\text{\AA}^3$ ]                       | 7106.2(9)                                                            |
| $Z$                                             | 16                                                                   |
| $\rho_{\text{calc}}$ [ $\text{gcm}^{-3}$ ]      | 1.592                                                                |
| $\mu$ [ $\text{mm}^{-1}$ ]                      | 3.703                                                                |
| $F(000)$                                        | 3488                                                                 |
| Crystal size [ $\text{mm}^3$ ]                  | $0.1 \times 0.2 \times 0.2$                                          |
| Crystal colour                                  | clear light colourless                                               |
| Crystal shape                                   | block                                                                |
| Radiation                                       | $\text{MoK}_\alpha$ ( $\lambda=0.71073 \text{ \AA}$ )                |
| $2\theta$ range [ $^\circ$ ]                    | 4.28 to 50.00 (0.84 $\text{\AA}$ )                                   |
| Index ranges                                    | $-36 \leq h \leq 36$<br>$-11 \leq k \leq 11$<br>$-27 \leq l \leq 17$ |
| Reflections collected                           | 18548                                                                |
| Independent reflections                         | 6118<br>$R_{\text{int}} = 0.0301$<br>$R_{\text{sigma}} = 0.0556$     |
| Completeness to $\theta = 25.000^\circ$         | 97.7 %                                                               |
| Data / Restraints / Parameters                  | 6118 / 0 / 362                                                       |
| Goodness-of-fit on $F^2$                        | 0.890                                                                |
| Final $R$ indexes [ $I \geq 2\sigma(I)$ ]       | $R_1 = 0.0301$<br>$wR_2 = 0.0636$                                    |
| Final $R$ indexes [all data]                    | $R_1 = 0.0483$<br>$wR_2 = 0.0653$                                    |
| Largest peak/hole [ $\text{e}\text{\AA}^{-3}$ ] | 1.22/−0.67                                                           |

**Table S41. Bond lengths and angles for CP3D2**

| <b>Atom–Atom</b>      | <b>Length [Å]</b> |                            |                  |
|-----------------------|-------------------|----------------------------|------------------|
| Cu2–Cu3               | 2.9438(9)         | C12–C13                    | 1.511(5)         |
| Cu2–Br2 <sup>#1</sup> | 2.4761(5)         | C18–H18A                   | 0.9900           |
| Cu2–Br2               | 2.4761(5)         | C18–H18B                   | 0.9900           |
| Cu2–S3 <sup>#1</sup>  | 2.3009(10)        | C25–C24                    | 1.170(5)         |
| Cu2–S3                | 2.3009(10)        | C25–C26                    | 1.445(6)         |
| Cu3–Br2               | 2.4874(5)         | C32–H32A                   | 0.9900           |
| Cu3–Br2 <sup>#1</sup> | 2.4873(5)         | C32–H32B                   | 0.9900           |
| Cu3–S4                | 2.3270(10)        | C32–C31                    | 1.516(5)         |
| Cu3–S4 <sup>#1</sup>  | 2.3269(10)        | C20–H20A                   | 0.9900           |
| Br1–Cu1               | 2.4527(5)         | C20–H20B                   | 0.9900           |
| Br1–Cu1 <sup>#2</sup> | 2.5282(6)         | C20–C21                    | 1.505(5)         |
| Cu1–Cu1 <sup>#2</sup> | 2.8624(9)         | C31–H31A                   | 0.9900           |
| Cu1–S1                | 2.2843(10)        | C31–H31B                   | 0.9900           |
| Cu1–S2                | 2.3229(10)        | C31–C30                    | 1.506(5)         |
| S1–C1                 | 1.833(3)          | C24–C23                    | 1.461(6)         |
| S1–C7                 | 1.809(3)          | C23–H23A                   | 0.9900           |
| S2–C10                | 1.806(3)          | C23–H23B                   | 0.9900           |
| S2–C11                | 1.826(3)          | C4–H4A                     | 0.9900           |
| S3–C17                | 1.820(3)          | C4–H4B                     | 0.9900           |
| S3–C23                | 1.810(4)          | C4–C3                      | 1.516(5)         |
| S4–C27                | 1.817(3)          | C3–H3A                     | 0.9900           |
| S4–C26                | 1.813(4)          | C3–H3B                     | 0.9900           |
| C19–H19A              | 0.9900            | C15–H15A                   | 0.9900           |
| C19–H19B              | 0.9900            | C15–H15B                   | 0.9900           |
| C19–C18               | 1.512(5)          | C15–C14                    | 1.499(5)         |
| C19–C20               | 1.512(5)          | C15–C16                    | 1.519(5)         |
| C10–H10A              | 0.9900            | C14–H14A                   | 0.9900           |
| C10–H10B              | 0.9900            | C14–H14B                   | 0.9900           |
| C10–C9 <sup>#3</sup>  | 1.455(5)          | C14–C13                    | 1.510(5)         |
| C17–H17               | 1.0000            | C28–H28A                   | 0.9900           |
| C17–C18               | 1.508(5)          | C28–H28B                   | 0.9900           |
| C17–C22               | 1.518(5)          | C28–C29                    | 1.518(5)         |
| C6–H6A                | 0.9900            | C30–H30A                   | 0.9900           |
| C6–H6B                | 0.9900            | C30–H30B                   | 0.9900           |
| C6–C5                 | 1.513(4)          | C30–C29                    | 1.502(6)         |
| C6–C1                 | 1.516(5)          | C11–H11                    | 1.0000           |
| C2–H2A                | 0.9900            | C11–C16                    | 1.511(5)         |
| C2–H2B                | 0.9900            | C22–H22A                   | 0.9900           |
| C2–C1                 | 1.505(5)          | C22–H22B                   | 0.9900           |
| C2–C3                 | 1.519(5)          | C22–C21                    | 1.531(5)         |
| C5–H5A                | 0.9900            | C29–H29A                   | 0.9900           |
| C5–H5B                | 0.9900            | C29–H29B                   | 0.9900           |
| C5–C4                 | 1.511(5)          | C26–H26A                   | 0.9900           |
| C27–H27               | 1.0000            | C26–H26B                   | 0.9900           |
| C27–C32               | 1.509(5)          | C16–H16A                   | 0.9900           |
| C27–C28               | 1.518(5)          | C16–H16B                   | 0.9900           |
| C9–C8                 | 1.182(4)          | C13–H13A                   | 0.9900           |
| C1–H1                 | 1.0000            | C13–H13B                   | 0.9900           |
| C7–H7A                | 0.9900            | C21–H21A                   | 0.9900           |
| C7–H7B                | 0.9900            | C21–H21B                   | 0.9900           |
| C7–C8                 | 1.465(5)          |                            |                  |
| C12–H12A              | 0.9900            | <b>Atom–Atom–Atom</b>      | <b>Angle [°]</b> |
| C12–H12B              | 0.9900            | Br2–Cu2–Cu3                | 53.799(14)       |
| C12–C11               | 1.518(5)          | Br2 <sup>#1</sup> –Cu2–Cu3 | 53.797(14)       |
|                       |                   | Br2 <sup>#1</sup> –Cu2–Br2 | 107.60(3)        |

|                                          |             |                         |          |
|------------------------------------------|-------------|-------------------------|----------|
| S3-Cu2-Cu3                               | 125.91(3)   | C22-C17-S3              | 106.8(2) |
| S3 <sup>#1</sup> -Cu2-Cu3                | 125.91(3)   | C22-C17-H17             | 108.6    |
| S3 <sup>#1</sup> -Cu2-Br2                | 108.29(2)   | H6A-C6-H6B              | 108.0    |
| S3-Cu2-Br2                               | 112.28(2)   | C5-C6-H6A               | 109.4    |
| S3-Cu2-Br2 <sup>#1</sup>                 | 108.29(2)   | C5-C6-H6B               | 109.4    |
| S3 <sup>#1</sup> -Cu2-Br2 <sup>#1</sup>  | 112.27(2)   | C5-C6-C1                | 111.3(3) |
| S3 <sup>#1</sup> -Cu2-S3                 | 108.17(6)   | C1-C6-H6A               | 109.4    |
| Br2-Cu3-Cu2                              | 53.447(14)  | C1-C6-H6B               | 109.4    |
| Br2 <sup>#1</sup> -Cu3-Cu2               | 53.446(14)  | H2A-C2-H2B              | 108.0    |
| Br2 <sup>#1</sup> -Cu3-Br2               | 106.89(3)   | C1-C2-H2A               | 109.4    |
| S4 <sup>#1</sup> -Cu3-Cu2                | 126.34(3)   | C1-C2-H2B               | 109.4    |
| S4-Cu3-Cu2                               | 126.34(3)   | C1-C2-C3                | 111.2(3) |
| S4 <sup>#1</sup> -Cu3-Br2                | 111.58(2)   | C3-C2-H2A               | 109.4    |
| S4 <sup>#1</sup> -Cu3-Br2 <sup>#1</sup>  | 109.76(3)   | C3-C2-H2B               | 109.4    |
| S4-Cu3-Br2 <sup>#1</sup>                 | 111.58(2)   | C6-C5-H5A               | 109.4    |
| S4-Cu3-Br2                               | 109.76(3)   | C6-C5-H5B               | 109.4    |
| S4 <sup>#1</sup> -Cu3-S4                 | 107.32(6)   | H5A-C5-H5B              | 108.0    |
| Cu2-Br2-Cu3                              | 72.75(2)    | C4-C5-C6                | 111.2(3) |
| Cu1-Br1-Cu1 <sup>#2</sup>                | 70.134(19)  | C4-C5-H5A               | 109.4    |
| Br1-Cu1-Br1 <sup>#2</sup>                | 109.867(19) | C4-C5-H5B               | 109.4    |
| Br1-Cu1-Cu1 <sup>#2</sup>                | 56.170(17)  | S4-C27-H27              | 108.1    |
| Br1 <sup>#2</sup> -Cu1-Cu1 <sup>#2</sup> | 53.697(17)  | C32-C27-S4              | 114.5(3) |
| S1-Cu1-Br1                               | 118.13(3)   | C32-C27-H27             | 108.1    |
| S1-Cu1-Br1 <sup>#2</sup>                 | 108.43(3)   | C32-C27-C28             | 110.6(3) |
| S1-Cu1-Cu1 <sup>#2</sup>                 | 133.09(3)   | C28-C27-S4              | 107.1(2) |
| S1-Cu1-S2                                | 114.12(3)   | C28-C27-H27             | 108.1    |
| S2-Cu1-Br1 <sup>#2</sup>                 | 101.72(3)   | C8-C9-C10 <sup>#3</sup> | 175.9(4) |
| S2-Cu1-Br1                               | 103.30(3)   | S1-C1-H1                | 108.5    |
| S2-Cu1-Cu1 <sup>#2</sup>                 | 112.12(3)   | C6-C1-S1                | 112.4(2) |
| C1-S1-Cu1                                | 110.53(11)  | C6-C1-H1                | 108.5    |
| C7-S1-Cu1                                | 103.76(11)  | C2-C1-S1                | 106.6(2) |
| C7-S1-C1                                 | 100.86(16)  | C2-C1-C6                | 112.3(3) |
| C10-S2-Cu1                               | 103.65(12)  | C2-C1-H1                | 108.5    |
| C10-S2-C11                               | 101.02(16)  | S1-C7-H7A               | 109.2    |
| C11-S2-Cu1                               | 110.07(12)  | S1-C7-H7B               | 109.2    |
| C17-S3-Cu2                               | 105.38(11)  | H7A-C7-H7B              | 107.9    |
| C23-S3-Cu2                               | 104.26(12)  | C8-C7-S1                | 112.0(2) |
| C23-S3-C17                               | 102.18(17)  | C8-C7-H7A               | 109.2    |
| C27-S4-Cu3                               | 100.13(12)  | C8-C7-H7B               | 109.2    |
| C26-S4-Cu3                               | 104.62(13)  | H12A-C12-H12B           | 107.8    |
| C26-S4-C27                               | 102.08(17)  | C11-C12-H12A            | 109.0    |
| H19A-C19-H19B                            | 108.0       | C11-C12-H12B            | 109.0    |
| C18-C19-H19A                             | 109.4       | C13-C12-H12A            | 109.0    |
| C18-C19-H19B                             | 109.4       | C13-C12-H12B            | 109.0    |
| C20-C19-H19A                             | 109.4       | C13-C12-C11             | 112.8(3) |
| C20-C19-H19B                             | 109.4       | C19-C18-H18A            | 109.4    |
| C20-C19-C18                              | 111.3(3)    | C19-C18-H18B            | 109.4    |
| S2-C10-H10A                              | 108.8       | C17-C18-C19             | 111.1(3) |
| S2-C10-H10B                              | 108.8       | C17-C18-H18A            | 109.4    |
| H10A-C10-H10B                            | 107.7       | C17-C18-H18B            | 109.4    |
| C9 <sup>#3</sup> -C10-S2                 | 113.7(2)    | H18A-C18-H18B           | 108.0    |
| C9 <sup>#3</sup> -C10-H10A               | 108.8       | C24-C25-C26             | 171.4(4) |
| C9 <sup>#3</sup> -C10-H10B               | 108.8       | C27-C32-H32A            | 109.7    |
| S3-C17-H17                               | 108.6       | C27-C32-H32B            | 109.7    |
| C18-C17-S3                               | 112.1(2)    | C27-C32-C31             | 109.9(3) |
| C18-C17-H17                              | 108.6       | H32A-C32-H32B           | 108.2    |
| C18-C17-C22                              | 112.0(3)    | C31-C32-H32A            | 109.7    |

|               |          |               |          |
|---------------|----------|---------------|----------|
| C31–C32–H32B  | 109.7    | C31–C30–H30B  | 109.4    |
| C19–C20–H20A  | 109.5    | H30A–C30–H30B | 108.0    |
| C19–C20–H20B  | 109.5    | C29–C30–C31   | 111.0(3) |
| H20A–C20–H20B | 108.1    | C29–C30–H30A  | 109.4    |
| C21–C20–C19   | 110.7(3) | C29–C30–H30B  | 109.4    |
| C21–C20–H20A  | 109.5    | S2–C11–H11    | 108.8    |
| C21–C20–H20B  | 109.5    | C12–C11–S2    | 111.9(3) |
| C32–C31–H31A  | 109.3    | C12–C11–H11   | 108.8    |
| C32–C31–H31B  | 109.3    | C16–C11–S2    | 108.1(2) |
| H31A–C31–H31B | 107.9    | C16–C11–C12   | 110.4(3) |
| C30–C31–C32   | 111.7(3) | C16–C11–H11   | 108.8    |
| C30–C31–H31A  | 109.3    | C17–C22–H22A  | 109.7    |
| C30–C31–H31B  | 109.3    | C17–C22–H22B  | 109.7    |
| C25–C24–C23   | 176.0(4) | C17–C22–C21   | 110.0(3) |
| S3–C23–H23A   | 108.9    | H22A–C22–H22B | 108.2    |
| S3–C23–H23B   | 108.9    | C21–C22–H22A  | 109.7    |
| C24–C23–S3    | 113.2(3) | C21–C22–H22B  | 109.7    |
| C24–C23–H23A  | 108.9    | C28–C29–H29A  | 109.1    |
| C24–C23–H23B  | 108.9    | C28–C29–H29B  | 109.1    |
| H23A–C23–H23B | 107.8    | C30–C29–C28   | 112.3(4) |
| C5–C4–H4A     | 109.5    | C30–C29–H29A  | 109.1    |
| C5–C4–H4B     | 109.5    | C30–C29–H29B  | 109.1    |
| C5–C4–C3      | 110.7(3) | H29A–C29–H29B | 107.9    |
| H4A–C4–H4B    | 108.1    | S4–C26–H26A   | 109.3    |
| C3–C4–H4A     | 109.5    | S4–C26–H26B   | 109.3    |
| C3–C4–H4B     | 109.5    | C25–C26–S4    | 111.8(3) |
| C2–C3–H3A     | 109.6    | C25–C26–H26A  | 109.3    |
| C2–C3–H3B     | 109.6    | C25–C26–H26B  | 109.3    |
| C4–C3–C2      | 110.5(3) | H26A–C26–H26B | 107.9    |
| C4–C3–H3A     | 109.6    | C15–C16–H16A  | 109.0    |
| C4–C3–H3B     | 109.6    | C15–C16–H16B  | 109.0    |
| H3A–C3–H3B    | 108.1    | C11–C16–C15   | 113.0(3) |
| H15A–C15–H15B | 108.0    | C11–C16–H16A  | 109.0    |
| C14–C15–H15A  | 109.4    | C11–C16–H16B  | 109.0    |
| C14–C15–H15B  | 109.4    | H16A–C16–H16B | 107.8    |
| C14–C15–C16   | 111.1(3) | C12–C13–H13A  | 109.6    |
| C16–C15–H15A  | 109.4    | C12–C13–H13B  | 109.6    |
| C16–C15–H15B  | 109.4    | C14–C13–C12   | 110.3(3) |
| C15–C14–H14A  | 109.3    | C14–C13–H13A  | 109.6    |
| C15–C14–H14B  | 109.3    | C14–C13–H13B  | 109.6    |
| C15–C14–C13   | 111.7(3) | H13A–C13–H13B | 108.1    |
| H14A–C14–H14B | 107.9    | C9–C8–C7      | 176.8(4) |
| C13–C14–H14A  | 109.3    | C20–C21–C22   | 111.8(3) |
| C13–C14–H14B  | 109.3    | C20–C21–H21A  | 109.3    |
| C27–C28–H28A  | 109.6    | C20–C21–H21B  | 109.3    |
| C27–C28–H28B  | 109.6    | C22–C21–H21A  | 109.3    |
| C27–C28–C29   | 110.1(3) | C22–C21–H21B  | 109.3    |
| H28A–C28–H28B | 108.2    | H21A–C21–H21B | 107.9    |
| C29–C28–H28A  | 109.6    |               |          |
| C29–C28–H28B  | 109.6    |               |          |
| C31–C30–H30A  | 109.4    |               |          |

Symmetry transformations used to generate equivalent atoms:  
 #1: 1-X, +Y, 1.5-Z; #2: 1.5-X, 1.5-Y, 1-Z; #3: 1.5-X, 0.5-Y, 1-Z;

**Table S42. Torsion angles for CP3D2**

| Atom–Atom–Atom–<br>Atom | Torsion Angle [°] |                |           |
|-------------------------|-------------------|----------------|-----------|
| Cu2–S3–C17–C18          | –169.9(2)         | Cu2–S3–C17–C22 | 67.1(2)   |
|                         |                   | Cu2–S3–C23–C24 | 50.3(3)   |
|                         |                   | Cu3–S4–C27–C32 | –162.9(2) |

|                             |           |                             |           |
|-----------------------------|-----------|-----------------------------|-----------|
| Cu3-S4-C27-C28              | 74.0(3)   | C7-S1-C1-C6                 | 67.3(3)   |
| Cu3-S4-C26-C25              | 51.5(3)   | C7-S1-C1-C2                 | -169.2(2) |
| Cu1-S1-C1-C6                | -42.0(3)  | C12-C11-C16-C15             | -52.1(4)  |
| Cu1-S1-C1-C2                | 81.5(2)   | C18-C19-C20-C21             | -56.4(4)  |
| Cu1-S1-C7-C8                | -176.8(2) | C18-C17-C22-C21             | 54.7(4)   |
| Cu1-S2-C10-C9 <sup>#1</sup> | 61.0(3)   | C32-C27-C28-C29             | 57.4(5)   |
| Cu1-S2-C11-C12              | -175.3(2) | C32-C31-C30-C29             | -54.8(5)  |
| Cu1-S2-C11-C16              | 62.9(2)   | C20-C19-C18-C17             | 55.9(4)   |
| S2-C11-C16-C15              | 70.6(4)   | C31-C30-C29-C28             | 53.9(5)   |
| S3-C17-C18-C19              | -175.6(2) | C23-S3-C17-C18              | -61.2(3)  |
| S3-C17-C22-C21              | 177.8(2)  | C23-S3-C17-C22              | 175.8(2)  |
| S4-C27-C32-C31              | -179.6(2) | C3-C2-C1-S1                 | -177.7(3) |
| S4-C27-C28-C29              | -177.3(3) | C3-C2-C1-C6                 | -54.2(4)  |
| C19-C20-C21-C22             | 56.4(4)   | C15-C14-C13-C12             | 56.5(4)   |
| C10-S2-C11-C12              | -66.2(3)  | C14-C15-C16-C11             | 53.8(4)   |
| C10-S2-C11-C16              | 172.0(2)  | C28-C27-C32-C31             | -58.4(4)  |
| C17-S3-C23-C24              | -59.2(3)  | C11-S2-C10-C9 <sup>#1</sup> | -53.1(3)  |
| C17-C22-C21-C20             | -55.3(4)  | C11-C12-C13-C14             | -55.6(4)  |
| C6-C5-C4-C3                 | 57.1(4)   | C22-C17-C18-C19             | -55.6(4)  |
| C5-C6-C1-S1                 | 173.5(2)  | C26-S4-C27-C32              | -55.5(3)  |
| C5-C6-C1-C2                 | 53.3(4)   | C26-S4-C27-C28              | -178.5(3) |
| C5-C4-C3-C2                 | -57.6(4)  | C16-C15-C14-C13             | -55.6(4)  |
| C27-S4-C26-C25              | -52.5(3)  | C13-C12-C11-S2              | -67.1(4)  |
| C27-C32-C31-C30             | 57.2(4)   | C13-C12-C11-C16             | 53.3(4)   |
| C27-C28-C29-C30             | -55.1(5)  |                             |           |
| C1-S1-C7-C8                 | 68.7(3)   |                             |           |
| C1-C6-C5-C4                 | -54.5(4)  |                             |           |
| C1-C2-C3-C4                 | 56.1(4)   |                             |           |

Symmetry transformations used to generate equivalent atoms:  
<sup>#1</sup>: 1.5-X, 0.5-Y, 1-Z;





## Crystal Data and Experimental

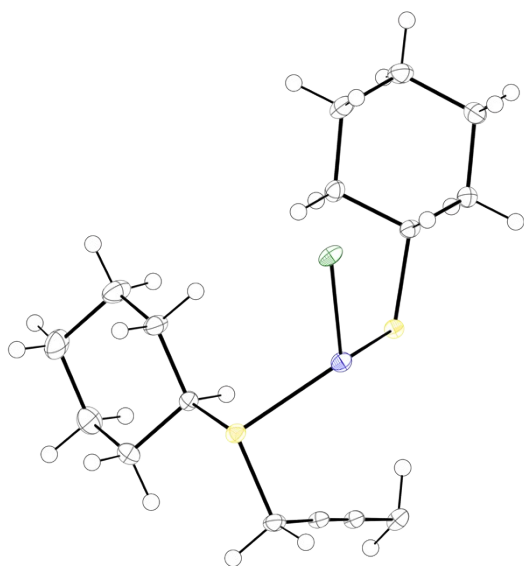

**Experimental:** The material was recrystallised from a mixture of acetonitrile and methanol by slow evaporation. The data for CP4 were collected from a shock-cooled single crystal at 115.0(1) K on a Nonius Kappa Apex II  $\lambda$ -geometry diffractometer with a X-ray tube using a graphite as monochromator and an APEX2 detector. The diffractometer was equipped with an Oxford Cryostream 600 low temperature device and used Mo  $K_{\alpha}$  radiation ( $\lambda = 0.71073$  Å). All data were integrated with SAINT (2013), and a multi-scan absorption correction using SADABS 2012/1 was applied.<sup>[1,2]</sup> The structure was solved by direct methods with SUPERFLIP,<sup>[8]</sup> and refined by full-matrix least-squares methods against  $F^2$  using SHELXL.<sup>[3,4]</sup> All non-hydrogen atoms were refined with anisotropic displacement parameters. The hydrogen atoms were refined isotropically on calculated positions using a riding model with their  $U_{iso}$  values constrained to 1.5 times the  $U_{eq}$  of their pivot atoms for terminal  $sp^3$  carbon atoms and 1.2 times for all other carbon atoms. Crystallographic data for the structures reported in this paper have been deposited with the Cambridge Crystallographic Data Centre.<sup>[5]</sup> CCDC 2326259 contain the supplementary crystallographic data for this paper. These data can be obtained free of charge from The Cambridge Crystallographic Data Centre via [www.ccdc.cam.ac.uk/structures](http://www.ccdc.cam.ac.uk/structures). This report and the CIF file were generated using FinalCif.<sup>[6]</sup>

**Table S43.** Crystal data and structure refinement for CP4

|                                         |                                                                      |
|-----------------------------------------|----------------------------------------------------------------------|
| Internal Reference                      | CP4                                                                  |
| CCDC number                             | 2326259                                                              |
| Empirical formula                       | $C_{16}H_{26}ClCuS_2$                                                |
| Formula weight                          | 381.48                                                               |
| Temperature [K]                         | 115.0(1)                                                             |
| Crystal system                          | monoclinic                                                           |
| Space group (number)                    | $P2_1/c$ (14)                                                        |
| $a$ [Å]                                 | 11.3631(5)                                                           |
| $b$ [Å]                                 | 9.2959(4)                                                            |
| $c$ [Å]                                 | 17.5929(7)                                                           |
| $\alpha$ [°]                            | 90                                                                   |
| $\beta$ [°]                             | 107.3267(13)                                                         |
| $\gamma$ [°]                            | 90                                                                   |
| Volume [Å <sup>3</sup> ]                | 1774.01(13)                                                          |
| $Z$                                     | 4                                                                    |
| $\rho_{calc}$ [gcm <sup>-3</sup> ]      | 1.428                                                                |
| $\mu$ [mm <sup>-1</sup> ]               | 1.606                                                                |
| $F(000)$                                | 800                                                                  |
| Crystal size [mm <sup>3</sup> ]         | 0.15×0.2×0.25                                                        |
| Crystal colour                          | clear light colourless                                               |
| Crystal shape                           | prism                                                                |
| Radiation                               | Mo $K_{\alpha}$ ( $\lambda=0.71073$ Å)                               |
| 2 $\theta$ range [°]                    | 5.77 to 55.00 (0.77 Å)                                               |
| Index ranges                            | $-14 \leq h \leq 14$<br>$-12 \leq k \leq 12$<br>$-16 \leq l \leq 22$ |
| Reflections collected                   | 33599                                                                |
| Independent reflections                 | 4063<br>$R_{int} = 0.0343$<br>$R_{\sigma} = 0.0192$                  |
| Completeness to $\theta = 26.000^\circ$ | 99.9 %                                                               |
| Data / Restraints / Parameters          | 4063 / 0 / 181                                                       |
| Goodness-of-fit on $F^2$                | 1.046                                                                |
| Final $R$ indexes [ $\geq 2\sigma(I)$ ] | $R_1 = 0.0196$<br>$wR_2 = 0.0445$                                    |
| Final $R$ indexes [all data]            | $R_1 = 0.0265$<br>$wR_2 = 0.0472$                                    |
| Largest peak/hole [eÅ <sup>-3</sup> ]   | 0.31/−0.23                                                           |

**Table S44. Bond lengths and angles for CP4**

| <b>Atom–Atom</b>                         | <b>Length [Å]</b> |                           |             |
|------------------------------------------|-------------------|---------------------------|-------------|
| Cu1–Cu1 <sup>#1</sup>                    | 2.7766(3)         | C11–Cu1–C11 <sup>#1</sup> | 107.892(11) |
| Cu1–Cl1 <sup>#1</sup>                    | 2.3785(4)         | S1–Cu1–Cu1 <sup>#1</sup>  | 121.449(13) |
| Cu1–Cl1                                  | 2.3387(4)         | S1–Cu1–Cl1 <sup>#1</sup>  | 106.991(13) |
| Cu1–S1                                   | 2.3148(4)         | S1–Cu1–Cl1                | 108.796(13) |
| Cu1–S2                                   | 2.2973(4)         | S2–Cu1–Cu1 <sup>#1</sup>  | 121.849(13) |
| S1–C11                                   | 1.8332(13)        | S2–Cu1–Cl1                | 114.721(14) |
| S1–C1 <sup>#2</sup>                      | 1.8293(14)        | S2–Cu1–Cl1 <sup>#1</sup>  | 101.817(13) |
| S2–C5                                    | 1.8236(14)        | S2–Cu1–S1                 | 115.850(14) |
| S2–C4                                    | 1.8281(14)        | Cu1–Cl1–Cu1 <sup>#1</sup> | 72.109(11)  |
| C8–H8A                                   | 0.9900            | C11–S1–Cu1                | 102.35(4)   |
| C8–H8B                                   | 0.9900            | C1 <sup>#2</sup> –S1–Cu1  | 100.61(5)   |
| C8–C9                                    | 1.526(2)          | C1 <sup>#2</sup> –S1–C11  | 103.27(6)   |
| C8–C7                                    | 1.523(2)          | C5–S2–Cu1                 | 104.49(4)   |
| C9–H9A                                   | 0.9900            | C5–S2–C4                  | 102.96(6)   |
| C9–H9B                                   | 0.9900            | C4–S2–Cu1                 | 101.06(5)   |
| C9–C10                                   | 1.528(2)          | H8A–C8–H8B                | 108.0       |
| C5–H5                                    | 1.0000            | C9–C8–H8A                 | 109.4       |
| C5–C6                                    | 1.5220(19)        | C9–C8–H8B                 | 109.4       |
| C5–C10                                   | 1.5282(18)        | C7–C8–H8A                 | 109.4       |
| C6–H6A                                   | 0.9900            | C7–C8–H8B                 | 109.4       |
| C6–H6B                                   | 0.9900            | C7–C8–C9                  | 111.12(13)  |
| C6–C7                                    | 1.532(2)          | C8–C9–H9A                 | 109.4       |
| C12–H12A                                 | 0.9900            | C8–C9–H9B                 | 109.4       |
| C12–H12B                                 | 0.9900            | C8–C9–C10                 | 111.10(13)  |
| C12–C13                                  | 1.5348(19)        | H9A–C9–H9B                | 108.0       |
| C12–C11                                  | 1.5245(18)        | C10–C9–H9A                | 109.4       |
| C10–H10A                                 | 0.9900            | C10–C9–H9B                | 109.4       |
| C10–H10B                                 | 0.9900            | S2–C5–H5                  | 108.8       |
| C13–H13A                                 | 0.9900            | C6–C5–S2                  | 113.47(10)  |
| C13–H13B                                 | 0.9900            | C6–C5–H5                  | 108.8       |
| C13–C14                                  | 1.527(2)          | C6–C5–C10                 | 110.70(11)  |
| C7–H7A                                   | 0.9900            | C10–C5–S2                 | 106.21(9)   |
| C7–H7B                                   | 0.9900            | C10–C5–H5                 | 108.8       |
| C16–H16A                                 | 0.9900            | C5–C6–H6A                 | 109.7       |
| C16–H16B                                 | 0.9900            | C5–C6–H6B                 | 109.7       |
| C16–C11                                  | 1.5283(18)        | C5–C6–C7                  | 110.00(12)  |
| C16–C15                                  | 1.530(2)          | H6A–C6–H6B                | 108.2       |
| C11–H11                                  | 1.0000            | C7–C6–H6A                 | 109.7       |
| C15–H15A                                 | 0.9900            | C7–C6–H6B                 | 109.7       |
| C15–H15B                                 | 0.9900            | H12A–C12–H12B             | 108.2       |
| C15–C14                                  | 1.524(2)          | C13–C12–H12A              | 109.7       |
| C14–H14A                                 | 0.9900            | C13–C12–H12B              | 109.7       |
| C14–H14B                                 | 0.9900            | C11–C12–H12A              | 109.7       |
| C4–H4A                                   | 0.9900            | C11–C12–H12B              | 109.7       |
| C4–H4B                                   | 0.9900            | C11–C12–C13               | 109.79(11)  |
| C4–C3                                    | 1.4603(19)        | C9–C10–H10A               | 109.5       |
| C2–C3                                    | 1.191(2)          | C9–C10–H10B               | 109.5       |
| C2–C1                                    | 1.4646(19)        | C5–C10–C9                 | 110.61(12)  |
| C1–H1A                                   | 0.9900            | C5–C10–H10A               | 109.5       |
| C1–H1B                                   | 0.9900            | C5–C10–H10B               | 109.5       |
|                                          |                   | H10A–C10–H10B             | 108.1       |
|                                          |                   | C12–C13–H13A              | 109.4       |
|                                          |                   | C12–C13–H13B              | 109.4       |
|                                          |                   | H13A–C13–H13B             | 108.0       |
|                                          |                   | C14–C13–C12               | 111.25(12)  |
| <b>Atom–Atom–Atom</b>                    | <b>Angle [°]</b>  |                           |             |
| C11–Cu1–Cu1 <sup>#1</sup>                | 54.612(10)        |                           |             |
| C11 <sup>#1</sup> –Cu1–Cu1 <sup>#1</sup> | 53.279(10)        |                           |             |

|               |            |                          |            |
|---------------|------------|--------------------------|------------|
| C14–C13–H13A  | 109.4      | C14–C15–H15A             | 109.3      |
| C14–C13–H13B  | 109.4      | C14–C15–H15B             | 109.3      |
| C8–C7–C6      | 111.41(13) | C13–C14–H14A             | 109.4      |
| C8–C7–H7A     | 109.3      | C13–C14–H14B             | 109.4      |
| C8–C7–H7B     | 109.3      | C15–C14–C13              | 111.05(12) |
| C6–C7–H7A     | 109.3      | C15–C14–H14A             | 109.4      |
| C6–C7–H7B     | 109.3      | C15–C14–H14B             | 109.4      |
| H7A–C7–H7B    | 108.0      | H14A–C14–H14B            | 108.0      |
| H16A–C16–H16B | 108.2      | S2–C4–H4A                | 108.7      |
| C11–C16–H16A  | 109.6      | S2–C4–H4B                | 108.7      |
| C11–C16–H16B  | 109.6      | H4A–C4–H4B               | 107.6      |
| C11–C16–C15   | 110.11(11) | C3–C4–S2                 | 114.44(9)  |
| C15–C16–H16A  | 109.6      | C3–C4–H4A                | 108.7      |
| C15–C16–H16B  | 109.6      | C3–C4–H4B                | 108.7      |
| S1–C11–H11    | 108.6      | C3–C2–C1                 | 179.64(14) |
| C12–C11–S1    | 113.61(9)  | C2–C3–C4                 | 178.09(15) |
| C12–C11–C16   | 110.65(11) | S1 <sup>#2</sup> –C1–H1A | 108.8      |
| C12–C11–H11   | 108.6      | S1 <sup>#2</sup> –C1–H1B | 108.8      |
| C16–C11–S1    | 106.60(9)  | C2–C1–S1 <sup>#2</sup>   | 113.92(10) |
| C16–C11–H11   | 108.6      | C2–C1–H1A                | 108.8      |
| C16–C15–H15A  | 109.3      | C2–C1–H1B                | 108.8      |
| C16–C15–H15B  | 109.3      | H1A–C1–H1B               | 107.7      |
| H15A–C15–H15B | 108.0      |                          |            |
| C14–C15–C16   | 111.46(12) |                          |            |

Symmetry transformations used to generate equivalent atoms:  
#1: -X, -Y, 1-Z; #2: -X, 1-Y, 1-Z;

**Table S45. Torsion angles for CP4**

| Atom–Atom–Atom–<br>Atom | Torsion Angle [°] |                              |            |
|-------------------------|-------------------|------------------------------|------------|
| Cu1–S1–C11–C12          | 160.24(9)         | C13–C12–C11–S1               | 178.55(9)  |
| Cu1–S1–C11–C16          | -77.62(9)         | C13–C12–C11–C16              | 58.68(15)  |
| Cu1–S2–C5–C6            | 164.27(9)         | C7–C8–C9–C10                 | -54.91(19) |
| Cu1–S2–C5–C10           | -73.90(9)         | C16–C15–C14–C13              | -54.93(16) |
| Cu1–S2–C4–C3            | -55.40(11)        | C11–C12–C13–C14              | -57.04(15) |
| S2–C5–C6–C7             | 177.19(10)        | C11–C16–C15–C14              | 56.35(16)  |
| S2–C5–C10–C9            | 178.53(10)        | C15–C16–C11–S1               | 177.60(9)  |
| C8–C9–C10–C5            | 56.08(17)         | C15–C16–C11–C12              | -58.41(15) |
| C9–C8–C7–C6             | 55.45(19)         | C4–S2–C5–C6                  | 59.03(11)  |
| C5–S2–C4–C3             | 52.45(12)         | C4–S2–C5–C10                 | -179.14(9) |
| C5–C6–C7–C8             | -56.83(17)        | C1 <sup>#1</sup> –S1–C11–C12 | 56.04(11)  |
| C6–C5–C10–C9            | -57.88(16)        | C1 <sup>#1</sup> –S1–C11–C16 | 178.18(9)  |
| C12–C13–C14–C15         | 55.26(16)         |                              |            |
| C10–C5–C6–C7            | 57.89(16)         |                              |            |

Symmetry transformations used to generate equivalent atoms:  
#1: -X, 1-Y, 1-Z;



## Crystal Data and Experimental

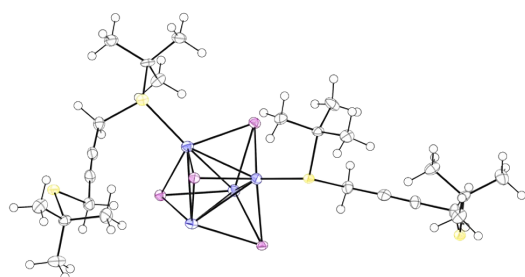

**Experimental:** The data for CP5 were collected from a shock-cooled single crystal at 100.0(1) K on a Bruker D8 VENTURE four-circle diffractometer with a X-ray tube using a graphite as monochromator and a CPAD PHOTON II area detector detector. The diffractometer used Mo  $K_{\alpha}$  radiation ( $\lambda = 0.71073$  Å). All data were integrated with SAINT V8.38A and a multi-scan absorption correction using SADABS 2016/2 was applied.<sup>[1,2]</sup> The structure was solved by direct methods with XT and refined by full-matrix least-squares methods against  $F^2$  using SHELXL.<sup>[3,4]</sup> All non-hydrogen atoms were refined with anisotropic displacement parameters. The hydrogen atoms were refined isotropically on calculated positions using a riding model with their  $U_{\text{iso}}$  values constrained to 1.5 times the  $U_{\text{eq}}$  of their pivot atoms for terminal  $sp^3$  carbon atoms and 1.2 times for all other carbon atoms. Crystallographic data for the structures reported in this paper have been deposited with the Cambridge Crystallographic Data Centre.<sup>[5]</sup> CCDC 2326261 contain the supplementary crystallographic data for this paper. These data can be obtained free of charge from The Cambridge Crystallographic Data Centre via [www.ccdc.cam.ac.uk/structures](http://www.ccdc.cam.ac.uk/structures). This report and the CIF file were generated using FinalCif.<sup>[6]</sup>

**Table S46.** Crystal data and structure refinement for CP5

|                                           |                                                                      |
|-------------------------------------------|----------------------------------------------------------------------|
| Internal Reference                        | CP5                                                                  |
| CCDC number                               | 2326261                                                              |
| Empirical formula                         | $C_{24}H_{44}Cu_4I_4S_4$                                             |
| Formula weight                            | 1222.59                                                              |
| Temperature [K]                           | 100.0(1)                                                             |
| Crystal system                            | orthorhombic                                                         |
| Space group (number)                      | $P2_12_12_1$ (19)                                                    |
| $a$ [Å]                                   | 9.9428(8)                                                            |
| $b$ [Å]                                   | 18.9973(17)                                                          |
| $c$ [Å]                                   | 19.2437(15)                                                          |
| $\alpha$ [°]                              | 90                                                                   |
| $\beta$ [°]                               | 90                                                                   |
| $\gamma$ [°]                              | 90                                                                   |
| Volume [Å <sup>3</sup> ]                  | 3634.9(5)                                                            |
| $Z$                                       | 4                                                                    |
| $\rho_{\text{calc}}$ [gcm <sup>-3</sup> ] | 2.234                                                                |
| $\mu$ [mm <sup>-1</sup> ]                 | 5.950                                                                |
| $F(000)$                                  | 2320                                                                 |
| Crystal size [mm <sup>3</sup> ]           | 0.081×0.109×0.139                                                    |
| Crystal colour                            | clear light colourless                                               |
| Crystal shape                             | block                                                                |
| Radiation                                 | Mo $K_{\alpha}$ ( $\lambda=0.71073$ Å)                               |
| $2\theta$ range [°]                       | 4.29 to 55.00 (0.77 Å)                                               |
| Index ranges                              | $-12 \leq h \leq 12$<br>$-24 \leq k \leq 24$<br>$-25 \leq l \leq 23$ |
| Reflections collected                     | 32078                                                                |
| Independent reflections                   | 8319<br>$R_{\text{int}} = 0.0437$<br>$R_{\text{sigma}} = 0.0395$     |
| Completeness to $\theta = 25.242^\circ$   | 99.9 %                                                               |
| Data / Restraints / Parameters            | 8319 / 0 / 338                                                       |
| Goodness-of-fit on $F^2$                  | 1.064                                                                |
| Final $R$ indexes [ $I \geq 2\sigma(I)$ ] | $R_1 = 0.0296$<br>$wR_2 = 0.0720$                                    |
| Final $R$ indexes [all data]              | $R_1 = 0.0314$<br>$wR_2 = 0.0732$                                    |
| Largest peak/hole [eÅ <sup>-3</sup> ]     | 2.08/-1.36                                                           |
| Flack X parameter                         | -0.02(2)                                                             |

## Refinement details for CP5

Refined as a 2-component inversion twin.

Table S47. Bond lengths and angles for CP5

| Atom–Atom            | Length [Å] |                       |                  |
|----------------------|------------|-----------------------|------------------|
| I1–Cu1               | 2.7199(10) | C9–C11                | 1.531(10)        |
| I1–Cu3               | 2.6434(10) | C9–C12                | 1.531(10)        |
| I1–Cu4               | 2.6435(10) | C10–H10A              | 0.9800           |
| I2–Cu2               | 2.6679(10) | C10–H10B              | 0.9800           |
| I2–Cu3               | 2.6971(10) | C10–H10C              | 0.9800           |
| I2–Cu4               | 2.6914(10) | C11–H11A              | 0.9800           |
| I3–Cu1               | 2.6628(10) | C11–H11B              | 0.9800           |
| I3–Cu2               | 2.6470(10) | C11–H11C              | 0.9800           |
| I3–Cu3               | 2.7202(10) | C12–H12A              | 0.9800           |
| I4–Cu1               | 2.6910(10) | C12–H12B              | 0.9800           |
| I4–Cu2               | 2.6621(10) | C12–H12C              | 0.9800           |
| I4–Cu4               | 2.6764(10) | C13–C14               | 1.532(10)        |
| Cu1–Cu2              | 2.8905(12) | C13–C15               | 1.514(10)        |
| Cu1–Cu3              | 2.9060(13) | C13–C16               | 1.515(10)        |
| Cu1–Cu4              | 2.7715(13) | C14–H14A              | 0.9800           |
| Cu1–S2               | 2.3239(19) | C14–H14B              | 0.9800           |
| Cu2–Cu3              | 2.9039(12) | C14–H14C              | 0.9800           |
| Cu2–Cu4              | 2.8927(12) | C15–H15A              | 0.9800           |
| Cu2–S3               | 2.3216(18) | C15–H15B              | 0.9800           |
| Cu3–Cu4              | 2.8512(12) | C15–H15C              | 0.9800           |
| Cu3–S1 <sup>#1</sup> | 2.330(2)   | C16–H16A              | 0.9800           |
| Cu4–S4 <sup>#2</sup> | 2.3311(19) | C16–H16B              | 0.9800           |
| S1–C1                | 1.857(7)   | C16–H16C              | 0.9800           |
| S1–C5                | 1.839(7)   | C17–H17A              | 0.9900           |
| S2–C8                | 1.824(7)   | C17–H17B              | 0.9900           |
| S2–C9                | 1.862(7)   | C17–C18               | 1.463(10)        |
| S3–C13               | 1.861(7)   | C18–C19               | 1.192(10)        |
| S3–C17               | 1.837(7)   | C19–C20               | 1.477(9)         |
| S4–C20               | 1.836(7)   | C20–H20A              | 0.9900           |
| S4–C21               | 1.860(7)   | C20–H20B              | 0.9900           |
| C1–C2                | 1.525(10)  | C21–C22               | 1.525(10)        |
| C1–C3                | 1.521(10)  | C21–C23               | 1.522(10)        |
| C1–C4                | 1.531(10)  | C21–C24               | 1.520(10)        |
| C2–H2A               | 0.9800     | C22–H22A              | 0.9800           |
| C2–H2B               | 0.9800     | C22–H22B              | 0.9800           |
| C2–H2C               | 0.9800     | C22–H22C              | 0.9800           |
| C3–H3A               | 0.9800     | C23–H23A              | 0.9800           |
| C3–H3B               | 0.9800     | C23–H23B              | 0.9800           |
| C3–H3C               | 0.9800     | C23–H23C              | 0.9800           |
| C4–H4A               | 0.9800     | C24–H24A              | 0.9800           |
| C4–H4B               | 0.9800     | C24–H24B              | 0.9800           |
| C4–H4C               | 0.9800     | C24–H24C              | 0.9800           |
| C5–H5A               | 0.9900     |                       |                  |
| C5–H5B               | 0.9900     | <b>Atom–Atom–Atom</b> | <b>Angle [°]</b> |
| C5–C6                | 1.476(10)  | Cu3–I1–Cu1            | 65.60(3)         |
| C6–C7                | 1.176(11)  | Cu3–I1–Cu4            | 65.27(3)         |
| C7–C8                | 1.461(10)  | Cu4–I1–Cu1            | 62.21(3)         |
| C8–H8A               | 0.9900     | Cu2–I2–Cu3            | 65.54(3)         |
| C8–H8B               | 0.9900     | Cu2–I2–Cu4            | 65.33(3)         |
| C9–C10               | 1.511(10)  | Cu4–I2–Cu3            | 63.89(3)         |
|                      |            | Cu1–I3–Cu3            | 65.33(3)         |

|             |           |                           |           |
|-------------|-----------|---------------------------|-----------|
| Cu2-I3-Cu1  | 65.96(3)  | I3-Cu3-Cu2                | 56.04(3)  |
| Cu2-I3-Cu3  | 65.49(3)  | I3-Cu3-Cu4                | 103.60(4) |
| Cu2-I4-Cu1  | 65.36(3)  | Cu2-Cu3-Cu1               | 59.67(3)  |
| Cu2-I4-Cu4  | 65.62(3)  | Cu4-Cu3-Cu1               | 57.55(3)  |
| Cu4-I4-Cu1  | 62.18(3)  | Cu4-Cu3-Cu2               | 60.34(3)  |
| I1-Cu1-Cu2  | 106.23(4) | S1 <sup>#1</sup> -Cu3-I1  | 115.00(6) |
| I1-Cu1-Cu3  | 55.93(3)  | S1 <sup>#1</sup> -Cu3-I2  | 105.95(5) |
| I1-Cu1-Cu4  | 57.54(3)  | S1 <sup>#1</sup> -Cu3-I3  | 107.25(6) |
| I3-Cu1-I1   | 109.07(3) | S1 <sup>#1</sup> -Cu3-Cu1 | 149.14(6) |
| I3-Cu1-I4   | 108.13(3) | S1 <sup>#1</sup> -Cu3-Cu2 | 137.06(6) |
| I3-Cu1-Cu2  | 56.75(3)  | S1 <sup>#1</sup> -Cu3-Cu4 | 148.70(6) |
| I3-Cu1-Cu3  | 58.29(3)  | I1-Cu4-I2                 | 109.97(3) |
| I3-Cu1-Cu4  | 107.36(4) | I1-Cu4-I4                 | 115.60(3) |
| I4-Cu1-I1   | 112.60(3) | I1-Cu4-Cu1                | 60.25(3)  |
| I4-Cu1-Cu2  | 56.84(3)  | I1-Cu4-Cu2                | 108.26(3) |
| I4-Cu1-Cu3  | 106.29(3) | I1-Cu4-Cu3                | 57.36(3)  |
| I4-Cu1-Cu4  | 58.65(3)  | I2-Cu4-Cu1                | 108.27(4) |
| Cu2-Cu1-Cu3 | 60.13(3)  | I2-Cu4-Cu2                | 56.94(3)  |
| Cu4-Cu1-Cu2 | 61.40(3)  | I2-Cu4-Cu3                | 58.15(3)  |
| Cu4-Cu1-Cu3 | 60.23(3)  | I4-Cu4-I2                 | 107.54(3) |
| S2-Cu1-I1   | 106.64(5) | I4-Cu4-Cu1                | 59.17(3)  |
| S2-Cu1-I3   | 115.36(6) | I4-Cu4-Cu2                | 56.95(3)  |
| S2-Cu1-I4   | 105.10(5) | I4-Cu4-Cu3                | 108.25(4) |
| S2-Cu1-Cu2  | 146.76(6) | Cu1-Cu4-Cu2               | 61.33(3)  |
| S2-Cu1-Cu3  | 148.23(6) | Cu1-Cu4-Cu3               | 62.22(3)  |
| S2-Cu1-Cu4  | 137.27(6) | Cu3-Cu4-Cu2               | 60.73(3)  |
| I2-Cu2-Cu1  | 105.53(3) | S4 <sup>#2</sup> -Cu4-I1  | 110.65(5) |
| I2-Cu2-Cu3  | 57.71(3)  | S4 <sup>#2</sup> -Cu4-I2  | 114.21(5) |
| I2-Cu2-Cu4  | 57.73(3)  | S4 <sup>#2</sup> -Cu4-I4  | 98.57(5)  |
| I3-Cu2-I2   | 112.16(3) | S4 <sup>#2</sup> -Cu4-Cu1 | 136.57(6) |
| I3-Cu2-I4   | 109.47(3) | S4 <sup>#2</sup> -Cu4-Cu2 | 140.37(6) |
| I3-Cu2-Cu1  | 57.28(3)  | S4 <sup>#2</sup> -Cu4-Cu3 | 153.18(6) |
| I3-Cu2-Cu3  | 58.47(3)  | C1-S1-Cu3 <sup>#3</sup>   | 111.3(2)  |
| I3-Cu2-Cu4  | 104.38(3) | C5-S1-Cu3 <sup>#3</sup>   | 102.1(3)  |
| I4-Cu2-I2   | 108.65(3) | C5-S1-C1                  | 102.0(3)  |
| I4-Cu2-Cu1  | 57.80(3)  | C8-S2-Cu1                 | 103.2(2)  |
| I4-Cu2-Cu3  | 107.12(3) | C8-S2-C9                  | 103.6(3)  |
| I4-Cu2-Cu4  | 57.43(3)  | C9-S2-Cu1                 | 111.1(2)  |
| Cu1-Cu2-Cu3 | 60.20(3)  | C13-S3-Cu2                | 112.2(2)  |
| Cu1-Cu2-Cu4 | 57.27(3)  | C17-S3-Cu2                | 103.5(2)  |
| Cu4-Cu2-Cu3 | 58.93(3)  | C17-S3-C13                | 105.7(3)  |
| S3-Cu2-I2   | 101.96(5) | C20-S4-Cu4 <sup>#4</sup>  | 104.2(2)  |
| S3-Cu2-I3   | 113.91(5) | C20-S4-C21                | 104.4(3)  |
| S3-Cu2-I4   | 110.40(5) | C21-S4-Cu4 <sup>#4</sup>  | 112.2(2)  |
| S3-Cu2-Cu1  | 152.37(6) | C2-C1-S1                  | 104.5(5)  |
| S3-Cu2-Cu3  | 141.66(6) | C2-C1-C4                  | 109.6(6)  |
| S3-Cu2-Cu4  | 141.49(6) | C3-C1-S1                  | 111.2(5)  |
| I1-Cu3-I2   | 109.80(3) | C3-C1-C2                  | 111.0(6)  |
| I1-Cu3-I3   | 109.64(3) | C3-C1-C4                  | 110.0(6)  |
| I1-Cu3-Cu1  | 58.47(3)  | C4-C1-S1                  | 110.4(5)  |
| I1-Cu3-Cu2  | 107.93(4) | C1-C2-H2A                 | 109.5     |
| I1-Cu3-Cu4  | 57.37(3)  | C1-C2-H2B                 | 109.5     |
| I2-Cu3-I3   | 109.00(3) | C1-C2-H2C                 | 109.5     |
| I2-Cu3-Cu1  | 104.35(3) | H2A-C2-H2B                | 109.5     |
| I2-Cu3-Cu2  | 56.75(3)  | H2A-C2-H2C                | 109.5     |
| I2-Cu3-Cu4  | 57.96(3)  | H2B-C2-H2C                | 109.5     |
| I3-Cu3-Cu1  | 56.38(3)  | C1-C3-H3A                 | 109.5     |



|               |          |               |          |
|---------------|----------|---------------|----------|
| C1-C3-H3B     | 109.5    | C13-C14-H14C  | 109.5    |
| C1-C3-H3C     | 109.5    | H14A-C14-H14B | 109.5    |
| H3A-C3-H3B    | 109.5    | H14A-C14-H14C | 109.5    |
| H3A-C3-H3C    | 109.5    | H14B-C14-H14C | 109.5    |
| H3B-C3-H3C    | 109.5    | C13-C15-H15A  | 109.5    |
| C1-C4-H4A     | 109.5    | C13-C15-H15B  | 109.5    |
| C1-C4-H4B     | 109.5    | C13-C15-H15C  | 109.5    |
| C1-C4-H4C     | 109.5    | H15A-C15-H15B | 109.5    |
| H4A-C4-H4B    | 109.5    | H15A-C15-H15C | 109.5    |
| H4A-C4-H4C    | 109.5    | H15B-C15-H15C | 109.5    |
| H4B-C4-H4C    | 109.5    | C13-C16-H16A  | 109.5    |
| S1-C5-H5A     | 109.8    | C13-C16-H16B  | 109.5    |
| S1-C5-H5B     | 109.8    | C13-C16-H16C  | 109.5    |
| H5A-C5-H5B    | 108.3    | H16A-C16-H16B | 109.5    |
| C6-C5-S1      | 109.3(5) | H16A-C16-H16C | 109.5    |
| C6-C5-H5A     | 109.8    | H16B-C16-H16C | 109.5    |
| C6-C5-H5B     | 109.8    | S3-C17-H17A   | 108.1    |
| C7-C6-C5      | 176.0(8) | S3-C17-H17B   | 108.1    |
| C6-C7-C8      | 174.2(8) | H17A-C17-H17B | 107.3    |
| S2-C8-H8A     | 110.1    | C18-C17-S3    | 116.8(5) |
| S2-C8-H8B     | 110.1    | C18-C17-H17A  | 108.1    |
| C7-C8-S2      | 107.8(5) | C18-C17-H17B  | 108.1    |
| C7-C8-H8A     | 110.1    | C19-C18-C17   | 173.1(8) |
| C7-C8-H8B     | 110.1    | C18-C19-C20   | 177.1(8) |
| H8A-C8-H8B    | 108.5    | S4-C20-H20A   | 108.6    |
| C10-C9-S2     | 110.5(5) | S4-C20-H20B   | 108.6    |
| C10-C9-C11    | 111.6(6) | C19-C20-S4    | 114.5(5) |
| C10-C9-C12    | 111.7(6) | C19-C20-H20A  | 108.6    |
| C11-C9-S2     | 103.7(5) | C19-C20-H20B  | 108.6    |
| C12-C9-S2     | 109.0(5) | H20A-C20-H20B | 107.6    |
| C12-C9-C11    | 110.1(6) | C22-C21-S4    | 108.9(5) |
| C9-C10-H10A   | 109.5    | C23-C21-S4    | 103.6(5) |
| C9-C10-H10B   | 109.5    | C23-C21-C22   | 110.5(6) |
| C9-C10-H10C   | 109.5    | C24-C21-S4    | 111.2(5) |
| H10A-C10-H10B | 109.5    | C24-C21-C22   | 110.9(6) |
| H10A-C10-H10C | 109.5    | C24-C21-C23   | 111.4(6) |
| H10B-C10-H10C | 109.5    | C21-C22-H22A  | 109.5    |
| C9-C11-H11A   | 109.5    | C21-C22-H22B  | 109.5    |
| C9-C11-H11B   | 109.5    | C21-C22-H22C  | 109.5    |
| C9-C11-H11C   | 109.5    | H22A-C22-H22B | 109.5    |
| H11A-C11-H11B | 109.5    | H22A-C22-H22C | 109.5    |
| H11A-C11-H11C | 109.5    | H22B-C22-H22C | 109.5    |
| H11B-C11-H11C | 109.5    | C21-C23-H23A  | 109.5    |
| C9-C12-H12A   | 109.5    | C21-C23-H23B  | 109.5    |
| C9-C12-H12B   | 109.5    | C21-C23-H23C  | 109.5    |
| C9-C12-H12C   | 109.5    | H23A-C23-H23B | 109.5    |
| H12A-C12-H12B | 109.5    | H23A-C23-H23C | 109.5    |
| H12A-C12-H12C | 109.5    | H23B-C23-H23C | 109.5    |
| H12B-C12-H12C | 109.5    | C21-C24-H24A  | 109.5    |
| C14-C13-S3    | 107.7(5) | C21-C24-H24B  | 109.5    |
| C15-C13-S3    | 111.4(5) | C21-C24-H24C  | 109.5    |
| C15-C13-C14   | 110.6(6) | H24A-C24-H24B | 109.5    |
| C15-C13-C16   | 110.9(6) | H24A-C24-H24C | 109.5    |
| C16-C13-S3    | 105.2(5) | H24B-C24-H24C | 109.5    |
| C16-C13-C14   | 110.9(6) |               |          |
| C13-C14-H14A  | 109.5    |               |          |
| C13-C14-H14B  | 109.5    |               |          |

Symmetry transformations used to generate equivalent atoms:  
#1: 1-X, 0.5+Y, 1.5-Z; #2: -X, -0.5+Y, 1.5-Z; #3: 1-X, -0.5+Y, 1.5-Z;  
#4: -X, 0.5+Y, 1.5-Z;

**Table S48. Torsion angles for CP5**

| <b>Atom–Atom–Atom–<br/>Atom</b> | <b>Torsion Angle [°]</b> |                |           |
|---------------------------------|--------------------------|----------------|-----------|
| Cu1–S2–C8–C7                    | 64.1(5)                  | C5–S1–C1–C2    | 172.5(5)  |
| Cu1–S2–C9–C10                   | 38.4(6)                  | C5–S1–C1–C3    | –67.6(6)  |
| Cu1–S2–C9–C11                   | –81.3(5)                 | C5–S1–C1–C4    | 54.7(6)   |
| Cu1–S2–C9–C12                   | 161.4(4)                 | C8–S2–C9–C10   | –71.8(6)  |
| Cu2–S3–C13–C14                  | 167.2(4)                 | C8–S2–C9–C11   | 168.5(5)  |
| Cu2–S3–C13–C15                  | –71.3(5)                 | C8–S2–C9–C12   | 51.2(6)   |
| Cu2–S3–C13–C16                  | 48.9(5)                  | C9–S2–C8–C7    | –179.9(5) |
| Cu2–S3–C17–C18                  | –170.3(5)                | C13–S3–C17–C18 | 71.5(6)   |
| Cu3 <sup>#1</sup> –S1–C1–C2     | –79.3(5)                 | C17–S3–C13–C14 | –80.6(6)  |
| Cu3 <sup>#1</sup> –S1–C1–C3     | 40.5(6)                  | C17–S3–C13–C15 | 40.9(6)   |
| Cu3 <sup>#1</sup> –S1–C1–C4     | 162.9(5)                 | C17–S3–C13–C16 | 161.1(5)  |
| Cu3 <sup>#1</sup> –S1–C5–C6     | 78.2(5)                  | C20–S4–C21–C22 | 49.5(6)   |
| Cu4 <sup>#2</sup> –S4–C20–C19   | 153.5(5)                 | C20–S4–C21–C23 | 167.2(5)  |
| Cu4 <sup>#2</sup> –S4–C21–C22   | 161.7(4)                 | C20–S4–C21–C24 | –73.0(6)  |
| Cu4 <sup>#2</sup> –S4–C21–C23   | –80.6(5)                 | C21–S4–C20–C19 | –88.7(6)  |
| Cu4 <sup>#2</sup> –S4–C21–C24   | 39.2(6)                  |                |           |
| C1–S1–C5–C6                     | –166.6(5)                |                |           |

Symmetry transformations used to generate equivalent atoms:  
#1: 1-X, -0.5+Y, 1.5-Z; #2: -X, 0.5+Y, 1.5-Z;



## Crystal Data and Experimental

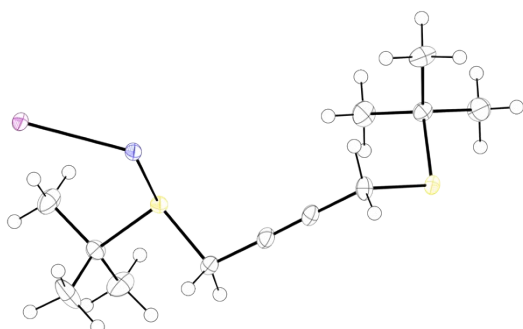

**Experimental:** The data for CP6 were collected from a shock-cooled single crystal at 100.0(1) K on a Bruker D8 Venture four-circle diffractometer with a X-ray tube using a graphite as monochromator and a CPAD PHOTON II area detector detector. The diffractometer was equipped with an Oxford Cryostream 800 low temperature device and used Mo  $K_{\alpha}$  radiation ( $\lambda = 0.71073$  Å). All data were integrated with SAINT V8.38A and a multi-scan absorption correction using SADABS 2016/2 was applied. <sup>[1,2]</sup> The structure was solved by direct methods with XT and refined by full-matrix least-squares methods against  $F^2$  using SHELXL. <sup>[3,4]</sup> All non-hydrogen atoms were refined with anisotropic displacement parameters. The hydrogen atoms were refined isotropically on calculated positions using a riding model with their  $U_{iso}$  values constrained to 1.5 times the  $U_{eq}$  of their pivot atoms for terminal  $sp^3$  carbon atoms and 1.2 times for all other carbon atoms. Crystallographic data for the structures reported in this paper have been deposited with the Cambridge Crystallographic Data Centre. <sup>[5]</sup> CCDC 2326262 contain the supplementary crystallographic data for this paper. These data can be obtained free of charge from The Cambridge Crystallographic Data Centre via [www.ccdc.cam.ac.uk/structures](http://www.ccdc.cam.ac.uk/structures). This report and the CIF file were generated using FinalCif. <sup>[6]</sup>

**Table S49.** Crystal data and structure refinement for CP6

|                                         |                                                                      |
|-----------------------------------------|----------------------------------------------------------------------|
| Internal Reference                      | CP6                                                                  |
| CCDC number                             | 2326262                                                              |
| Empirical formula                       | $C_{12}H_{22}CuS_2$                                                  |
| Formula weight                          | 420.85                                                               |
| Temperature [K]                         | 100.0(1)                                                             |
| Crystal system                          | monoclinic                                                           |
| Space group (number)                    | $P2_1/c$ (14)                                                        |
| $a$ [Å]                                 | 11.4251(3)                                                           |
| $b$ [Å]                                 | 16.2605(4)                                                           |
| $c$ [Å]                                 | 8.8793(2)                                                            |
| $\alpha$ [°]                            | 90                                                                   |
| $\beta$ [°]                             | 99.6380(10)                                                          |
| $\gamma$ [°]                            | 90                                                                   |
| Volume [Å <sup>3</sup> ]                | 1626.29(7)                                                           |
| $Z$                                     | 4                                                                    |
| $\rho_{calc}$ [gcm <sup>-3</sup> ]      | 1.719                                                                |
| $\mu$ [mm <sup>-1</sup> ]               | 3.474                                                                |
| $F(000)$                                | 832                                                                  |
| Crystal size [mm <sup>3</sup> ]         | 0.073×0.172×0.268                                                    |
| Crystal colour                          | clear light colourless                                               |
| Crystal shape                           | plate                                                                |
| Radiation                               | Mo $K_{\alpha}$ ( $\lambda=0.71073$ Å)                               |
| $2\theta$ range [°]                     | 4.40 to 54.99 (0.77 Å)                                               |
| Index ranges                            | $-14 \leq h \leq 14$<br>$-21 \leq k \leq 20$<br>$-11 \leq l \leq 11$ |
| Reflections collected                   | 25701                                                                |
| Independent reflections                 | 3733<br>$R_{int} = 0.0252$<br>$R_{sigma} = 0.0155$                   |
| Completeness to $\theta = 25.242^\circ$ | 99.9 %                                                               |
| Data / Restraints / Parameters          | 3733 / 0 / 151                                                       |
| Goodness-of-fit on $F^2$                | 1.079                                                                |
| Final $R$ indexes [ $\geq 2\sigma(I)$ ] | $R_1 = 0.0176$<br>$wR_2 = 0.0430$                                    |
| Final $R$ indexes [all data]            | $R_1 = 0.0190$<br>$wR_2 = 0.0438$                                    |
| Largest peak/hole [eÅ <sup>-3</sup> ]   | 1.29/-0.39                                                           |

**Table S50. Bond lengths and angles for CP6**

| <b>Atom–Atom</b>                       | <b>Length [Å]</b> |               |            |
|----------------------------------------|-------------------|---------------|------------|
| I1–Cu1                                 | 2.6025(3)         | C2–C1–S1      | 110.96(14) |
| I1–Cu1 <sup>#1</sup>                   | 2.7143(3)         | C2–C1–C3      | 111.14(19) |
| Cu1–S1                                 | 2.3340(5)         | C2–C1–C4      | 111.53(19) |
| Cu1–S2 <sup>#2</sup>                   | 2.3480(5)         | C3–C1–S1      | 104.09(14) |
| S1–C1                                  | 1.849(2)          | C3–C1–C4      | 110.06(17) |
| S1–C5                                  | 1.825(2)          | C4–C1–S1      | 108.79(15) |
| S2–C8                                  | 1.820(2)          | C1–C2–H2A     | 109.5      |
| S2–C9                                  | 1.856(2)          | C1–C2–H2B     | 109.5      |
| C1–C2                                  | 1.514(3)          | C1–C2–H2C     | 109.5      |
| C1–C3                                  | 1.523(3)          | H2A–C2–H2B    | 109.5      |
| C1–C4                                  | 1.525(3)          | H2A–C2–H2C    | 109.5      |
| C2–H2A                                 | 0.9800            | H2B–C2–H2C    | 109.5      |
| C2–H2B                                 | 0.9800            | C1–C3–H3A     | 109.5      |
| C2–H2C                                 | 0.9800            | C1–C3–H3B     | 109.5      |
| C3–H3A                                 | 0.9800            | C1–C3–H3C     | 109.5      |
| C3–H3B                                 | 0.9800            | H3A–C3–H3B    | 109.5      |
| C3–H3C                                 | 0.9800            | H3A–C3–H3C    | 109.5      |
| C4–H4A                                 | 0.9800            | H3B–C3–H3C    | 109.5      |
| C4–H4B                                 | 0.9800            | C1–C4–H4A     | 109.5      |
| C4–H4C                                 | 0.9800            | C1–C4–H4B     | 109.5      |
| C5–H5A                                 | 0.9900            | C1–C4–H4C     | 109.5      |
| C5–H5B                                 | 0.9900            | H4A–C4–H4B    | 109.5      |
| C5–C6                                  | 1.456(3)          | H4A–C4–H4C    | 109.5      |
| C6–C7                                  | 1.187(3)          | H4B–C4–H4C    | 109.5      |
| C7–C8                                  | 1.458(3)          | S1–C5–H5A     | 109.7      |
| C8–H8A                                 | 0.9900            | S1–C5–H5B     | 109.7      |
| C8–H8B                                 | 0.9900            | H5A–C5–H5B    | 108.2      |
| C9–C10                                 | 1.521(3)          | C6–C5–S1      | 109.63(14) |
| C9–C11                                 | 1.523(3)          | C6–C5–H5A     | 109.7      |
| C9–C12                                 | 1.524(3)          | C6–C5–H5B     | 109.7      |
| C10–H10A                               | 0.9800            | C7–C6–C5      | 177.2(2)   |
| C10–H10B                               | 0.9800            | C6–C7–C8      | 177.5(2)   |
| C10–H10C                               | 0.9800            | S2–C8–H8A     | 108.8      |
| C11–H11A                               | 0.9800            | S2–C8–H8B     | 108.8      |
| C11–H11B                               | 0.9800            | C7–C8–S2      | 113.79(14) |
| C11–H11C                               | 0.9800            | C7–C8–H8A     | 108.8      |
| C12–H12A                               | 0.9800            | C7–C8–H8B     | 108.8      |
| C12–H12B                               | 0.9800            | H8A–C8–H8B    | 107.7      |
| C12–H12C                               | 0.9800            | C10–C9–S2     | 111.23(14) |
|                                        |                   | C10–C9–C11    | 110.86(17) |
|                                        |                   | C10–C9–C12    | 110.53(18) |
| <b>Atom–Atom–Atom</b>                  | <b>Angle [°]</b>  | C11–C9–S2     | 109.58(14) |
| Cu1–I1–Cu1 <sup>#1</sup>               | 79.831(8)         | C11–C9–C12    | 110.53(18) |
| I1–Cu1–I1 <sup>#1</sup>                | 100.169(8)        | C12–C9–S2     | 103.92(14) |
| S1–Cu1–I1 <sup>#1</sup>                | 111.540(15)       | C9–C10–H10A   | 109.5      |
| S1–Cu1–I1                              | 122.422(15)       | C9–C10–H10B   | 109.5      |
| S1–Cu1–S2 <sup>#2</sup>                | 97.433(18)        | C9–C10–H10C   | 109.5      |
| S2 <sup>#2</sup> –Cu1–I1 <sup>#1</sup> | 103.435(14)       | H10A–C10–H10B | 109.5      |
| S2 <sup>#2</sup> –Cu1–I1               | 120.763(14)       | H10A–C10–H10C | 109.5      |
| C1–S1–Cu1                              | 114.93(7)         | H10B–C10–H10C | 109.5      |
| C5–S1–Cu1                              | 102.01(7)         | C9–C11–H11A   | 109.5      |
| C5–S1–C1                               | 101.68(9)         | C9–C11–H11B   | 109.5      |
| C8–S2–Cu1 <sup>#3</sup>                | 106.87(7)         | C9–C11–H11C   | 109.5      |
| C8–S2–C9                               | 104.15(9)         | H11A–C11–H11B | 109.5      |
| C9–S2–Cu1 <sup>#3</sup>                | 113.96(6)         | H11A–C11–H11C | 109.5      |

|               |       |
|---------------|-------|
| H11B–C11–H11C | 109.5 |
| C9–C12–H12A   | 109.5 |
| C9–C12–H12B   | 109.5 |
| C9–C12–H12C   | 109.5 |
| H12A–C12–H12B | 109.5 |

|               |       |
|---------------|-------|
| H12A–C12–H12C | 109.5 |
| H12B–C12–H12C | 109.5 |

Symmetry transformations used to generate equivalent atoms:  
 #1: -X, 1-Y, 1-Z; #2: +X, 1.5-Y, -0.5+Z; #3: +X, 1.5-Y, 0.5+Z;

**Table S51. Torsion angles for CP6**

| Atom–Atom–Atom–<br>Atom      | Torsion Angle [°] |
|------------------------------|-------------------|
| Cu1–S1–C1–C2                 | -53.82(17)        |
| Cu1–S1–C1–C3                 | 65.80(15)         |
| Cu1–S1–C1–C4                 | -176.88(13)       |
| Cu1–S1–C5–C6                 | -66.17(14)        |
| Cu1 <sup>#1</sup> –S2–C8–C7  | -153.53(13)       |
| Cu1 <sup>#1</sup> –S2–C9–C10 | -54.08(16)        |
| Cu1 <sup>#1</sup> –S2–C9–C11 | -177.01(12)       |
| Cu1 <sup>#1</sup> –S2–C9–C12 | 64.86(15)         |
| C1–S1–C5–C6                  | 174.89(14)        |

|              |             |
|--------------|-------------|
| C5–S1–C1–C2  | 55.47(18)   |
| C5–S1–C1–C3  | 175.10(14)  |
| C5–S1–C1–C4  | -67.59(16)  |
| C8–S2–C9–C10 | 61.99(16)   |
| C8–S2–C9–C11 | -60.93(16)  |
| C8–S2–C9–C12 | -179.07(14) |
| C9–S2–C8–C7  | 85.53(16)   |

Symmetry transformations used to generate equivalent atoms:  
 #1: +X, 1.5-Y, 0.5+Z;



## Crystal Data and Experimental

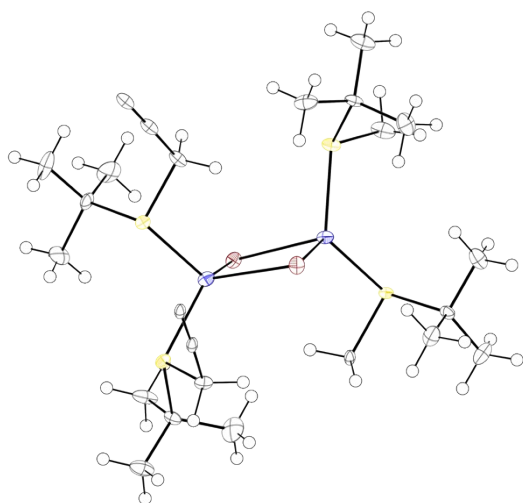

**Experimental:** The data for CP7 were collected from a shock-cooled single crystal at 115.00 K on a Nonius Kappa Apex II  $\lambda$ -geometry diffractometer with a X-ray tube using a graphite as monochromator and an APEX2 detector. The diffractometer was equipped with an Oxford Cryostream 600 low temperature device and used Mo  $K_{\alpha}$  radiation ( $\lambda = 0.71073 \text{ \AA}$ ). All data were integrated with SAINT V8.27B and a multi-scan absorption correction using SADABS unknown version was applied.<sup>[1,2]</sup> The structure was solved by direct methods with SHELXS, and refined by full-matrix least-squares methods against  $F^2$  using SHELXL.<sup>[3,4]</sup> All non-hydrogen atoms were refined with anisotropic displacement parameters. The hydrogen atoms were refined isotropically on calculated positions using a riding model with their  $U_{\text{iso}}$  values constrained to 1.5 times the  $U_{\text{eq}}$  of their pivot atoms for terminal  $\text{sp}^3$  carbon atoms and 1.2 times for all other carbon atoms. Crystallographic data for the structures reported in this paper have been deposited with the Cambridge Crystallographic Data Centre.<sup>[5]</sup> CCDC 2326263 contain the supplementary crystallographic data for this paper. These data can be obtained free of charge from The Cambridge Crystallographic Data Centre via [www.ccdc.cam.ac.uk/structures](http://www.ccdc.cam.ac.uk/structures). This report and the CIF file were generated using FinalCif.<sup>[6]</sup>

**Table S52.** Crystal data and structure refinement for CP7

|                                                 |                                                                      |
|-------------------------------------------------|----------------------------------------------------------------------|
| Internal Reference                              | CP7                                                                  |
| CCDC number                                     | 2326263                                                              |
| Empirical formula                               | $\text{C}_{24}\text{H}_{44}\text{Br}_2\text{Cu}_2\text{S}_4$         |
| Formula weight                                  | 747.73                                                               |
| Temperature [K]                                 | 115.00                                                               |
| Crystal system                                  | monoclinic                                                           |
| Space group (number)                            | $P2_1$ (4)                                                           |
| $a$ [ $\text{\AA}$ ]                            | 8.7637(14)                                                           |
| $b$ [ $\text{\AA}$ ]                            | 15.977(2)                                                            |
| $c$ [ $\text{\AA}$ ]                            | 11.262(2)                                                            |
| $\alpha$ [ $^\circ$ ]                           | 90                                                                   |
| $\beta$ [ $^\circ$ ]                            | 97.425(5)                                                            |
| $\gamma$ [ $^\circ$ ]                           | 90                                                                   |
| Volume [ $\text{\AA}^3$ ]                       | 1563.7(4)                                                            |
| $Z$                                             | 2                                                                    |
| $\rho_{\text{calc}}$ [ $\text{gcm}^{-3}$ ]      | 1.588                                                                |
| $\mu$ [ $\text{mm}^{-1}$ ]                      | 4.194                                                                |
| $F(000)$                                        | 760                                                                  |
| Crystal size [ $\text{mm}^3$ ]                  | 0.05 $\times$ 0.1 $\times$ 0.1                                       |
| Crystal colour                                  | clear light colourless                                               |
| Crystal shape                                   | needle                                                               |
| Radiation                                       | Mo $K_{\alpha}$ ( $\lambda=0.71073 \text{ \AA}$ )                    |
| $2\theta$ range [ $^\circ$ ]                    | 4.69 to 55.06 (0.77 $\text{\AA}$ )                                   |
| Index ranges                                    | $-11 \leq h \leq 10$<br>$-20 \leq k \leq 19$<br>$-12 \leq l \leq 14$ |
| Reflections collected                           | 11046                                                                |
| Independent reflections                         | 6598<br>$R_{\text{int}} = 0.0465$<br>$R_{\text{sigma}} = 0.1257$     |
| Completeness to $\theta = 25.242^\circ$         | 99.6 %                                                               |
| Data / Restraints / Parameters                  | 6598 / 1 / 278                                                       |
| Goodness-of-fit on $F^2$                        | 0.974                                                                |
| Final $R$ indexes [ $\geq 2\sigma(I)$ ]         | $R_1 = 0.0538$<br>$wR_2 = 0.0609$                                    |
| Final $R$ indexes [all data]                    | $R_1 = 0.0964$<br>$wR_2 = 0.0694$                                    |
| Largest peak/hole [ $\text{e}\text{\AA}^{-3}$ ] | 0.75/−0.77                                                           |
| Flack X parameter                               | 0.437(14)                                                            |



## Refinement details for CP7

Refined as a 2-component inversion twin.

Table S53. Bond lengths and angles for CP7

| Atom–Atom             | Length [Å] |                       |                  |
|-----------------------|------------|-----------------------|------------------|
| Br1–Cu1               | 2.5273(19) | C15–H15A              | 0.9900           |
| Br1–Cu2               | 2.4573(16) | C15–H15B              | 0.9900           |
| Br2–Cu1               | 2.4410(15) | C16–C17               | 1.546(16)        |
| Br2–Cu2               | 2.6106(19) | C16–C18               | 1.519(12)        |
| Cu1–S1                | 2.330(3)   | C16–C19               | 1.528(13)        |
| Cu1–S2                | 2.341(3)   | C17–H17A              | 0.9800           |
| Cu2–S3                | 2.295(2)   | C17–H17B              | 0.9800           |
| Cu2–S4                | 2.319(3)   | C17–H17C              | 0.9800           |
| S1–C1                 | 1.842(9)   | C18–H18A              | 0.9800           |
| S1–C5                 | 1.834(8)   | C18–H18B              | 0.9800           |
| S2–C8                 | 1.846(12)  | C18–H18C              | 0.9800           |
| S2–C12                | 1.821(10)  | C19–H19A              | 0.9800           |
| S3–C15                | 1.812(9)   | C19–H19B              | 0.9800           |
| S3–C16                | 1.844(10)  | C19–H19C              | 0.9800           |
| S4–C20                | 1.818(10)  | C20–H20A              | 0.9900           |
| S4–C21                | 1.848(12)  | C20–H20B              | 0.9900           |
| C1–C2                 | 1.529(11)  | C21–C22               | 1.520(13)        |
| C1–C3                 | 1.515(15)  | C21–C23               | 1.525(13)        |
| C1–C4                 | 1.506(14)  | C21–C24               | 1.517(13)        |
| C2–H2A                | 0.9800     | C22–H22A              | 0.9800           |
| C2–H2B                | 0.9800     | C22–H22B              | 0.9800           |
| C2–H2C                | 0.9800     | C22–H22C              | 0.9800           |
| C3–H3A                | 0.9800     | C23–H23A              | 0.9800           |
| C3–H3B                | 0.9800     | C23–H23B              | 0.9800           |
| C3–H3C                | 0.9800     | C23–H23C              | 0.9800           |
| C4–H4A                | 0.9800     | C24–H24A              | 0.9800           |
| C4–H4B                | 0.9800     | C24–H24B              | 0.9800           |
| C4–H4C                | 0.9800     | C24–H24C              | 0.9800           |
| C5–H5A                | 0.9900     |                       |                  |
| C5–H5B                | 0.9900     | <b>Atom–Atom–Atom</b> | <b>Angle [°]</b> |
| C5–C6                 | 1.450(11)  | Cu2–Br1–Cu1           | 81.46(6)         |
| C6–C7                 | 1.187(11)  | Cu1–Br2–Cu2           | 80.09(5)         |
| C7–C20 <sup>#1</sup>  | 1.452(12)  | Br2–Cu1–Br1           | 100.37(6)        |
| C8–C9                 | 1.536(14)  | S1–Cu1–Br1            | 112.85(8)        |
| C8–C10                | 1.528(15)  | S1–Cu1–Br2            | 121.56(7)        |
| C8–C11                | 1.522(14)  | S1–Cu1–S2             | 95.09(9)         |
| C9–H9A                | 0.9800     | S2–Cu1–Br1            | 106.13(9)        |
| C9–H9B                | 0.9800     | S2–Cu1–Br2            | 120.61(9)        |
| C9–H9C                | 0.9800     | Br1–Cu2–Br2           | 97.68(6)         |
| C10–H10A              | 0.9800     | S3–Cu2–Br1            | 117.50(8)        |
| C10–H10B              | 0.9800     | S3–Cu2–Br2            | 100.04(9)        |
| C10–H10C              | 0.9800     | S3–Cu2–S4             | 115.95(10)       |
| C11–H11A              | 0.9800     | S4–Cu2–Br1            | 118.56(9)        |
| C11–H11B              | 0.9800     | S4–Cu2–Br2            | 100.78(9)        |
| C11–H11C              | 0.9800     | C1–S1–Cu1             | 114.8(3)         |
| C12–H12A              | 0.9900     | C5–S1–Cu1             | 101.7(3)         |
| C12–H12B              | 0.9900     | C5–S1–C1              | 103.3(4)         |
| C12–C13               | 1.481(13)  | C8–S2–Cu1             | 111.2(3)         |
| C13–C14               | 1.159(11)  | C12–S2–Cu1            | 107.7(3)         |
| C14–C15 <sup>#2</sup> | 1.471(11)  | C12–S2–C8             | 105.2(5)         |
|                       |            | C15–S3–Cu2            | 111.4(3)         |

|                         |           |                             |           |
|-------------------------|-----------|-----------------------------|-----------|
| C15-S3-C16              | 101.4(4)  | C8-C11-H11C                 | 109.5     |
| C16-S3-Cu2              | 116.6(3)  | H11A-C11-H11B               | 109.5     |
| C20-S4-Cu2              | 104.9(3)  | H11A-C11-H11C               | 109.5     |
| C20-S4-C21              | 103.9(5)  | H11B-C11-H11C               | 109.5     |
| C21-S4-Cu2              | 113.7(3)  | S2-C12-H12A                 | 108.9     |
| C2-C1-S1                | 108.4(6)  | S2-C12-H12B                 | 108.9     |
| C3-C1-S1                | 103.3(7)  | H12A-C12-H12B               | 107.7     |
| C3-C1-C2                | 109.4(9)  | C13-C12-S2                  | 113.5(7)  |
| C4-C1-S1                | 111.1(7)  | C13-C12-H12A                | 108.9     |
| C4-C1-C2                | 111.9(9)  | C13-C12-H12B                | 108.9     |
| C4-C1-C3                | 112.3(8)  | C14-C13-C12                 | 177.5(11) |
| C1-C2-H2A               | 109.5     | C13-C14-C15 <sup>#2</sup>   | 177.2(11) |
| C1-C2-H2B               | 109.5     | S3-C15-H15A                 | 109.2     |
| C1-C2-H2C               | 109.5     | S3-C15-H15B                 | 109.2     |
| H2A-C2-H2B              | 109.5     | C14 <sup>#3</sup> -C15-S3   | 111.9(7)  |
| H2A-C2-H2C              | 109.5     | C14 <sup>#3</sup> -C15-H15A | 109.2     |
| H2B-C2-H2C              | 109.5     | C14 <sup>#3</sup> -C15-H15B | 109.2     |
| C1-C3-H3A               | 109.5     | H15A-C15-H15B               | 107.9     |
| C1-C3-H3B               | 109.5     | C17-C16-S3                  | 111.3(7)  |
| C1-C3-H3C               | 109.5     | C18-C16-S3                  | 110.6(7)  |
| H3A-C3-H3B              | 109.5     | C18-C16-C17                 | 111.6(9)  |
| H3A-C3-H3C              | 109.5     | C18-C16-C19                 | 109.7(8)  |
| H3B-C3-H3C              | 109.5     | C19-C16-S3                  | 103.9(7)  |
| C1-C4-H4A               | 109.5     | C19-C16-C17                 | 109.4(8)  |
| C1-C4-H4B               | 109.5     | C16-C17-H17A                | 109.5     |
| C1-C4-H4C               | 109.5     | C16-C17-H17B                | 109.5     |
| H4A-C4-H4B              | 109.5     | C16-C17-H17C                | 109.5     |
| H4A-C4-H4C              | 109.5     | H17A-C17-H17B               | 109.5     |
| H4B-C4-H4C              | 109.5     | H17A-C17-H17C               | 109.5     |
| S1-C5-H5A               | 110.1     | H17B-C17-H17C               | 109.5     |
| S1-C5-H5B               | 110.1     | C16-C18-H18A                | 109.5     |
| H5A-C5-H5B              | 108.4     | C16-C18-H18B                | 109.5     |
| C6-C5-S1                | 107.9(6)  | C16-C18-H18C                | 109.5     |
| C6-C5-H5A               | 110.1     | H18A-C18-H18B               | 109.5     |
| C6-C5-H5B               | 110.1     | H18A-C18-H18C               | 109.5     |
| C7-C6-C5                | 174.3(9)  | H18B-C18-H18C               | 109.5     |
| C6-C7-C20 <sup>#1</sup> | 177.2(10) | C16-C19-H19A                | 109.5     |
| C9-C8-S2                | 104.4(7)  | C16-C19-H19B                | 109.5     |
| C10-C8-S2               | 109.2(8)  | C16-C19-H19C                | 109.5     |
| C10-C8-C9               | 109.8(10) | H19A-C19-H19B               | 109.5     |
| C11-C8-S2               | 111.8(8)  | H19A-C19-H19C               | 109.5     |
| C11-C8-C9               | 109.6(9)  | H19B-C19-H19C               | 109.5     |
| C11-C8-C10              | 111.7(10) | S4-C20-H20A                 | 108.6     |
| C8-C9-H9A               | 109.5     | S4-C20-H20B                 | 108.6     |
| C8-C9-H9B               | 109.5     | C7 <sup>#4</sup> -C20-S4    | 114.5(6)  |
| C8-C9-H9C               | 109.5     | C7 <sup>#4</sup> -C20-H20A  | 108.6     |
| H9A-C9-H9B              | 109.5     | C7 <sup>#4</sup> -C20-H20B  | 108.6     |
| H9A-C9-H9C              | 109.5     | H20A-C20-H20B               | 107.6     |
| H9B-C9-H9C              | 109.5     | C22-C21-S4                  | 110.8(8)  |
| C8-C10-H10A             | 109.5     | C22-C21-C23                 | 110.2(9)  |
| C8-C10-H10B             | 109.5     | C23-C21-S4                  | 111.3(8)  |
| C8-C10-H10C             | 109.5     | C24-C21-S4                  | 103.7(7)  |
| H10A-C10-H10B           | 109.5     | C24-C21-C22                 | 110.3(10) |
| H10A-C10-H10C           | 109.5     | C24-C21-C23                 | 110.4(9)  |
| H10B-C10-H10C           | 109.5     | C21-C22-H22A                | 109.5     |
| C8-C11-H11A             | 109.5     | C21-C22-H22B                | 109.5     |
| C8-C11-H11B             | 109.5     | C21-C22-H22C                | 109.5     |

|               |       |               |       |
|---------------|-------|---------------|-------|
| H22A–C22–H22B | 109.5 | C21–C24–H24A  | 109.5 |
| H22A–C22–H22C | 109.5 | C21–C24–H24B  | 109.5 |
| H22B–C22–H22C | 109.5 | C21–C24–H24C  | 109.5 |
| C21–C23–H23A  | 109.5 | H24A–C24–H24B | 109.5 |
| C21–C23–H23B  | 109.5 | H24A–C24–H24C | 109.5 |
| C21–C23–H23C  | 109.5 | H24B–C24–H24C | 109.5 |
| H23A–C23–H23B | 109.5 |               |       |
| H23A–C23–H23C | 109.5 |               |       |
| H23B–C23–H23C | 109.5 |               |       |

Symmetry transformations used to generate equivalent atoms:  
 #1: 1-X, 0.5+Y, 1-Z; #2: 2-X, 0.5+Y, 1-Z; #3: 2-X, -0.5+Y, 1-Z;  
 #4: 1-X, -0.5+Y, 1-Z;

**Table S54. Torsion angles for CP7**

| Atom–Atom–Atom–<br>Atom      | Torsion Angle [°] |                              |           |
|------------------------------|-------------------|------------------------------|-----------|
| Cu1–S1–C1–C2                 | -179.7(6)         | C5–S1–C1–C2                  | 70.4(8)   |
| Cu1–S1–C1–C3                 | -63.7(8)          | C5–S1–C1–C3                  | -173.6(7) |
| Cu1–S1–C1–C4                 | 56.9(8)           | C5–S1–C1–C4                  | -53.0(8)  |
| Cu1–S1–C5–C6                 | 69.3(6)           | C8–S2–C12–C13                | 79.3(8)   |
| Cu1–S2–C8–C9                 | 61.2(7)           | C12–S2–C8–C9                 | 177.6(7)  |
| Cu1–S2–C8–C10                | 178.6(7)          | C12–S2–C8–C10                | -65.0(9)  |
| Cu1–S2–C8–C11                | -57.2(8)          | C12–S2–C8–C11                | 59.1(9)   |
| Cu1–S2–C12–C13               | -161.9(7)         | C15–S3–C16–C17               | -73.0(8)  |
| Cu2–S3–C15–C14 <sup>#1</sup> | 47.7(8)           | C15–S3–C16–C18               | 51.7(8)   |
| Cu2–S3–C16–C17               | 48.1(8)           | C15–S3–C16–C19               | 169.3(6)  |
| Cu2–S3–C16–C18               | 172.8(6)          | C16–S3–C15–C14 <sup>#1</sup> | 172.4(7)  |
| Cu2–S3–C16–C19               | -69.5(7)          | C20–S4–C21–C22               | 60.6(9)   |
| Cu2–S4–C20–C7 <sup>#2</sup>  | 152.3(7)          | C20–S4–C21–C23               | -62.4(8)  |
| Cu2–S4–C21–C22               | 174.0(7)          | C20–S4–C21–C24               | 178.9(6)  |
| Cu2–S4–C21–C23               | 51.0(8)           | C21–S4–C20–C7 <sup>#2</sup>  | -88.1(8)  |
| Cu2–S4–C21–C24               | -67.7(7)          |                              |           |
| C1–S1–C5–C6                  | -171.4(7)         |                              |           |

Symmetry transformations used to generate equivalent atoms:  
 #1: 2-X, -0.5+Y, 1-Z; #2: 1-X, -0.5+Y, 1-Z;



## Crystal Data and Experimental

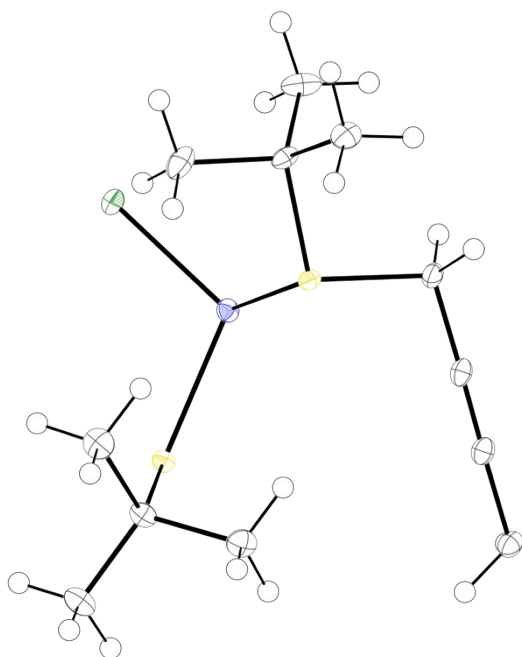

**Experimental:** The material was recrystallised from acetonitrile by slow evaporation. The data for CP8 were collected from a shock-cooled single crystal at 100.0(1) K on a Bruker D8 VENTURE  $\lambda$ -geometry diffractometer with a X-ray tube using a graphite as monochromator and a Photon 100 detector. The diffractometer was equipped with an Oxford Cryostream 800 low temperature device and used Mo  $K_{\alpha}$  radiation ( $\lambda = 0.71073 \text{ \AA}$ ). All data were integrated with SAINT v8.34A and a numerical absorption correction using SADABS 2012/1 was applied.<sup>[1,2]</sup> The structure was solved by direct methods with SUPERFLIP<sup>[8]</sup> and refined by full-matrix least-squares methods against  $F^2$  using SHELXL.<sup>[3,4]</sup> All non-hydrogen atoms were refined with anisotropic displacement parameters. The hydrogen atoms were refined isotropically on calculated positions using a riding model with their  $U_{\text{iso}}$  values constrained to 1.5 times the  $U_{\text{eq}}$  of their pivot atoms for terminal  $\text{sp}^3$  carbon atoms and 1.2 times for all other carbon atoms. Crystallographic data for the structures reported in this paper have been deposited with the Cambridge Crystallographic Data Centre.<sup>[5]</sup> CCDC 2326264 contain the supplementary crystallographic data for this paper. These data can be obtained free of charge from The Cambridge Crystallographic Data Centre via [www.ccdc.cam.ac.uk/structures](http://www.ccdc.cam.ac.uk/structures). This report and the CIF file were generated using FinalCif.<sup>[6]</sup>

**Table S55.** Crystal data and structure refinement for CP8

|                                                 |                                                                      |
|-------------------------------------------------|----------------------------------------------------------------------|
| Internal Reference                              | CP8                                                                  |
| CCDC number                                     | 2326264                                                              |
| Empirical formula                               | $\text{C}_{12}\text{H}_{22}\text{ClCuS}_2$                           |
| Formula weight                                  | 329.40                                                               |
| Temperature [K]                                 | 100.0(1)                                                             |
| Crystal system                                  | monoclinic                                                           |
| Space group (number)                            | $P2_1/c$ (14)                                                        |
| $a$ [ $\text{\AA}$ ]                            | 12.0784(5)                                                           |
| $b$ [ $\text{\AA}$ ]                            | 9.6471(4)                                                            |
| $c$ [ $\text{\AA}$ ]                            | 13.6377(5)                                                           |
| $\alpha$ [ $^\circ$ ]                           | 90                                                                   |
| $\beta$ [ $^\circ$ ]                            | 107.3257(12)                                                         |
| $\gamma$ [ $^\circ$ ]                           | 90                                                                   |
| Volume [ $\text{\AA}^3$ ]                       | 1516.98(11)                                                          |
| $Z$                                             | 4                                                                    |
| $\rho_{\text{calc}}$ [ $\text{gcm}^{-3}$ ]      | 1.442                                                                |
| $\mu$ [ $\text{mm}^{-1}$ ]                      | 1.865                                                                |
| $F(000)$                                        | 688                                                                  |
| Crystal size [ $\text{mm}^3$ ]                  | 0.16 $\times$ 0.18 $\times$ 0.32                                     |
| Crystal colour                                  | clear light colourless                                               |
| Crystal shape                                   | prism                                                                |
| Radiation                                       | Mo $K_{\alpha}$ ( $\lambda=0.71073 \text{ \AA}$ )                    |
| $2\theta$ range [ $^\circ$ ]                    | 5.79 to 55.04 (0.77 $\text{\AA}$ )                                   |
| Index ranges                                    | $-15 \leq h \leq 15$<br>$-12 \leq k \leq 12$<br>$-17 \leq l \leq 17$ |
| Reflections collected                           | 43880                                                                |
| Independent reflections                         | 3493<br>$R_{\text{int}} = 0.0497$<br>$R_{\text{sigma}} = 0.0189$     |
| Completeness to $\theta = 26.000^\circ$         | 99.9 %                                                               |
| Data / Restraints / Parameters                  | 3493 / 0 / 151                                                       |
| Goodness-of-fit on $F^2$                        | 1.077                                                                |
| Final $R$ indexes [ $\geq 2\sigma(I)$ ]         | $R_1 = 0.0208$<br>$wR_2 = 0.0441$                                    |
| Final $R$ indexes [all data]                    | $R_1 = 0.0290$<br>$wR_2 = 0.0470$                                    |
| Largest peak/hole [ $\text{e}\text{\AA}^{-3}$ ] | 0.35/−0.25                                                           |

**Table S56. Bond lengths and angles for CP8**

| <b>Atom–Atom</b>         | <b>Length [Å]</b> |                          |            |
|--------------------------|-------------------|--------------------------|------------|
| C1–H1A                   | 0.9900            | S1–C4–H4B                | 110.2      |
| C1–H1B                   | 0.9900            | C6–C5–C7                 | 110.52(13) |
| C1–C2                    | 1.463(2)          | C6–C5–C8                 | 111.53(13) |
| C1–S2 <sup>#1</sup>      | 1.8329(15)        | C6–C5–S1                 | 111.31(10) |
| C2–C3                    | 1.193(2)          | C7–C5–C8                 | 110.16(12) |
| C3–C4                    | 1.462(2)          | C7–C5–S1                 | 110.14(10) |
| C4–H4A                   | 0.9900            | C8–C5–S1                 | 102.96(10) |
| C4–H4B                   | 0.9900            | C5–C6–H6A                | 109.5      |
| C4–S1                    | 1.8280(15)        | C5–C6–H6B                | 109.5      |
| C5–C6                    | 1.521(2)          | C5–C6–H6C                | 109.5      |
| C5–C7                    | 1.529(2)          | H6A–C6–H6B               | 109.5      |
| C5–C8                    | 1.529(2)          | H6A–C6–H6C               | 109.5      |
| C5–S1                    | 1.8551(15)        | H6B–C6–H6C               | 109.5      |
| C6–H6A                   | 0.9800            | C5–C7–H7A                | 109.5      |
| C6–H6B                   | 0.9800            | C5–C7–H7B                | 109.5      |
| C6–H6C                   | 0.9800            | C5–C7–H7C                | 109.5      |
| C7–H7A                   | 0.9800            | H7A–C7–H7B               | 109.5      |
| C7–H7B                   | 0.9800            | H7A–C7–H7C               | 109.5      |
| C7–H7C                   | 0.9800            | H7B–C7–H7C               | 109.5      |
| C8–H8A                   | 0.9800            | C5–C8–H8A                | 109.5      |
| C8–H8B                   | 0.9800            | C5–C8–H8B                | 109.5      |
| C8–H8C                   | 0.9800            | C5–C8–H8C                | 109.5      |
| C9–C10                   | 1.527(2)          | H8A–C8–H8B               | 109.5      |
| C9–C11                   | 1.524(2)          | H8A–C8–H8C               | 109.5      |
| C9–C12                   | 1.528(2)          | H8B–C8–H8C               | 109.5      |
| C9–S2                    | 1.8564(15)        | C10–C9–C12               | 110.08(13) |
| C10–H10A                 | 0.9800            | C10–C9–S2                | 111.40(11) |
| C10–H10B                 | 0.9800            | C11–C9–C10               | 110.25(12) |
| C10–H10C                 | 0.9800            | C11–C9–C12               | 110.66(13) |
| C11–H11A                 | 0.9800            | C11–C9–S2                | 109.52(10) |
| C11–H11B                 | 0.9800            | C12–C9–S2                | 104.81(10) |
| C11–H11C                 | 0.9800            | C9–C10–H10A              | 109.5      |
| C12–H12A                 | 0.9800            | C9–C10–H10B              | 109.5      |
| C12–H12B                 | 0.9800            | C9–C10–H10C              | 109.5      |
| C12–H12C                 | 0.9800            | H10A–C10–H10B            | 109.5      |
| S1–Cu1                   | 2.2858(4)         | H10A–C10–H10C            | 109.5      |
| S2–Cu1                   | 2.3202(4)         | H10B–C10–H10C            | 109.5      |
| C11–Cu1                  | 2.3526(4)         | C9–C11–H11A              | 109.5      |
| C11–Cu1 <sup>#2</sup>    | 2.4187(4)         | C9–C11–H11B              | 109.5      |
|                          |                   | C9–C11–H11C              | 109.5      |
|                          |                   | H11A–C11–H11B            | 109.5      |
|                          |                   | H11A–C11–H11C            | 109.5      |
|                          |                   | H11B–C11–H11C            | 109.5      |
|                          |                   | C9–C12–H12A              | 109.5      |
|                          |                   | C9–C12–H12B              | 109.5      |
|                          |                   | C9–C12–H12C              | 109.5      |
|                          |                   | H12A–C12–H12B            | 109.5      |
|                          |                   | H12A–C12–H12C            | 109.5      |
|                          |                   | H12B–C12–H12C            | 109.5      |
|                          |                   | C4–S1–C5                 | 104.48(7)  |
|                          |                   | C4–S1–Cu1                | 103.04(5)  |
|                          |                   | C5–S1–Cu1                | 110.86(5)  |
|                          |                   | C1 <sup>#2</sup> –S2–C9  | 102.74(7)  |
|                          |                   | C1 <sup>#2</sup> –S2–Cu1 | 103.89(5)  |
|                          |                   | C9–S2–Cu1                | 111.30(5)  |
| <b>Atom–Atom–Atom</b>    | <b>Angle [°]</b>  |                          |            |
| H1A–C1–H1B               | 107.7             |                          |            |
| C2–C1–H1A                | 108.8             |                          |            |
| C2–C1–H1B                | 108.8             |                          |            |
| C2–C1–S2 <sup>#1</sup>   | 113.86(11)        |                          |            |
| S2 <sup>#1</sup> –C1–H1A | 108.8             |                          |            |
| S2 <sup>#1</sup> –C1–H1B | 108.8             |                          |            |
| C3–C2–C1                 | 174.91(16)        |                          |            |
| C2–C3–C4                 | 177.12(16)        |                          |            |
| C3–C4–H4A                | 110.2             |                          |            |
| C3–C4–H4B                | 110.2             |                          |            |
| C3–C4–S1                 | 107.47(10)        |                          |            |
| H4A–C4–H4B               | 108.5             |                          |            |
| S1–C4–H4A                | 110.2             |                          |            |

|                           |             |
|---------------------------|-------------|
| Cu1–Cl1–Cu1 <sup>#3</sup> | 84.002(13)  |
| S1–Cu1–S2                 | 115.936(15) |
| S1–Cu1–Cl1 <sup>#3</sup>  | 108.905(14) |
| S1–Cu1–Cl1                | 119.605(14) |
| S2–Cu1–Cl1                | 107.532(14) |

|                           |             |
|---------------------------|-------------|
| S2–Cu1–Cl1 <sup>#3</sup>  | 106.340(14) |
| Cl1–Cu1–Cl1 <sup>#3</sup> | 95.998(13)  |

Symmetry transformations used to generate equivalent atoms:  
#1: +X, -0.5-Y, 0.5+Z; #2: +X, -0.5-Y, -0.5+Z; #3: 1-X, -Y, 1-Z;

**Table S57. Torsion angles for CP8**

| Atom–Atom–Atom–<br>Atom | Torsion Angle [°] |
|-------------------------|-------------------|
| C3–C4–S1–C5             | 172.29(10)        |
| C3–C4–S1–Cu1            | -71.78(10)        |
| C6–C5–S1–C4             | 57.86(12)         |
| C6–C5–S1–Cu1            | -52.49(12)        |
| C7–C5–S1–C4             | -65.09(12)        |
| C7–C5–S1–Cu1            | -175.44(9)        |
| C8–C5–S1–C4             | 177.46(10)        |
| C8–C5–S1–Cu1            | 67.11(10)         |

|                            |            |
|----------------------------|------------|
| C10–C9–S2–C1 <sup>#1</sup> | -66.62(12) |
| C10–C9–S2–Cu1              | 44.01(11)  |
| C11–C9–S2–C1 <sup>#1</sup> | 55.62(12)  |
| C11–C9–S2–Cu1              | 166.25(9)  |
| C12–C9–S2–C1 <sup>#1</sup> | 174.36(10) |
| C12–C9–S2–Cu1              | -75.00(10) |

Symmetry transformations used to generate equivalent atoms:  
#1: +X, -0.5-Y, -0.5+Z;

## Crystal structure of CP9

### Crystal Data and Experimental

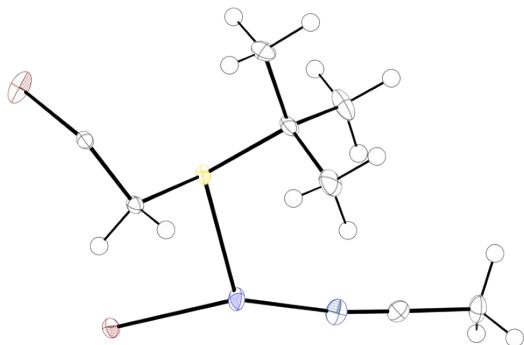

**Experimental:** The data for CP9 were collected from a shock-cooled single crystal at 100.0(1) K on a Bruker D8 VENTURE area detector four-circle diffractometer with a X-ray tube using a graphite as monochromator and a CPAD PHOTON II area detector detector. The diffractometer used Mo  $K_{\alpha}$  radiation ( $\lambda = 0.71073 \text{ \AA}$ ). All data were integrated with SAINT V8.38A and a multi-scan absorption correction using SADABS 2016/2 was applied.<sup>[1,2]</sup> The structure was solved by direct methods with XT and refined by full-matrix least-squares methods against  $F^2$  using SHELXL.<sup>[3,4]</sup> All non-hydrogen atoms were refined with anisotropic displacement parameters. The hydrogen atoms were refined isotropically on calculated positions using a riding model with their  $U_{\text{iso}}$  values constrained to 1.5 times the  $U_{\text{eq}}$  of their pivot atoms for terminal  $\text{sp}^3$  carbon atoms and 1.2 times for all other carbon atoms. Crystallographic data for the structures reported in this paper have been deposited with the Cambridge Crystallographic Data Centre.<sup>[5]</sup> CCDC 2326265 contain the supplementary crystallographic data for this paper. These data can be obtained free of charge from The Cambridge Crystallographic Data Centre via [www.ccdc.cam.ac.uk/structures](http://www.ccdc.cam.ac.uk/structures). This report and the CIF file were generated using FinalCif.<sup>[6]</sup>

**Table S58.** Crystal data and structure refinement for CP9

|                                                 |                                                                     |
|-------------------------------------------------|---------------------------------------------------------------------|
| Internal Reference                              | CP9                                                                 |
| CCDC number                                     | 2326265                                                             |
| Empirical formula                               | $\text{C}_8\text{H}_{14}\text{Br}_2\text{CuNS}$                     |
| Formula weight                                  | 379.62                                                              |
| Temperature [K]                                 | 100.0(1)                                                            |
| Crystal system                                  | monoclinic                                                          |
| Space group (number)                            | $P2_1/n$ (14)                                                       |
| $a$ [ $\text{\AA}$ ]                            | 8.1661(4)                                                           |
| $b$ [ $\text{\AA}$ ]                            | 10.2416(5)                                                          |
| $c$ [ $\text{\AA}$ ]                            | 15.1301(6)                                                          |
| $\alpha$ [ $^\circ$ ]                           | 90                                                                  |
| $\beta$ [ $^\circ$ ]                            | 98.034(2)                                                           |
| $\gamma$ [ $^\circ$ ]                           | 90                                                                  |
| Volume [ $\text{\AA}^3$ ]                       | 1252.97(10)                                                         |
| $Z$                                             | 4                                                                   |
| $\rho_{\text{calc}}$ [ $\text{gcm}^{-3}$ ]      | 2.012                                                               |
| $\mu$ [ $\text{mm}^{-1}$ ]                      | 8.247                                                               |
| $F(000)$                                        | 736                                                                 |
| Crystal size [ $\text{mm}^3$ ]                  | 0.192×0.334×0.436                                                   |
| Crystal colour                                  | clear light colourless                                              |
| Crystal shape                                   | block                                                               |
| Radiation                                       | Mo $K_{\alpha}$ ( $\lambda=0.71073 \text{ \AA}$ )                   |
| $2\theta$ range [ $^\circ$ ]                    | 4.82 to 55.00 (0.77 $\text{\AA}$ )                                  |
| Index ranges                                    | $-9 \leq h \leq 10$<br>$-10 \leq k \leq 13$<br>$-19 \leq l \leq 19$ |
| Reflections collected                           | 10454                                                               |
| Independent reflections                         | 2860<br>$R_{\text{int}} = 0.0354$<br>$R_{\text{sigma}} = 0.0369$    |
| Completeness to $\theta = 25.242^\circ$         | 99.6 %                                                              |
| Data / Restraints / Parameters                  | 2860 / 0 / 122                                                      |
| Goodness-of-fit on $F^2$                        | 1.062                                                               |
| Final $R$ indexes [ $I \geq 2\sigma(I)$ ]       | $R_1 = 0.0258$<br>$wR_2 = 0.0554$                                   |
| Final $R$ indexes [all data]                    | $R_1 = 0.0308$<br>$wR_2 = 0.0576$                                   |
| Largest peak/hole [ $\text{e}\text{\AA}^{-3}$ ] | 0.54/−0.91                                                          |



**Table S59. Bond lengths and angles for CP9**

| Atom–Atom                                | Length [Å]       |                          |            |
|------------------------------------------|------------------|--------------------------|------------|
| Br1–Cu1                                  | 2.4888(4)        | C7–S1–C3                 | 107.05(12) |
| Br1–Cu1 <sup>#1</sup>                    | 2.5469(4)        | C2–N1–Cu1                | 170.8(2)   |
| Br2–C8                                   | 1.912(2)         | H1A–C1–H1B               | 109.5      |
| Cu1–Cu1 <sup>#1</sup>                    | 3.0534(7)        | H1A–C1–H1C               | 109.5      |
| Cu1–S1                                   | 2.3112(7)        | H1B–C1–H1C               | 109.5      |
| Cu1–N1                                   | 1.950(2)         | C2–C1–H1A                | 109.5      |
| S1–C3                                    | 1.851(2)         | C2–C1–H1B                | 109.5      |
| S1–C7                                    | 1.815(3)         | C2–C1–H1C                | 109.5      |
| N1–C2                                    | 1.140(3)         | N1–C2–C1                 | 179.0(3)   |
| C1–H1A                                   | 0.9800           | C4–C3–S1                 | 102.74(18) |
| C1–H1B                                   | 0.9800           | C5–C3–S1                 | 111.38(18) |
| C1–H1C                                   | 0.9800           | C5–C3–C4                 | 111.2(2)   |
| C1–C2                                    | 1.455(3)         | C5–C3–C6                 | 110.6(2)   |
| C3–C4                                    | 1.529(4)         | C6–C3–S1                 | 110.88(18) |
| C3–C5                                    | 1.517(4)         | C6–C3–C4                 | 109.9(2)   |
| C3–C6                                    | 1.521(4)         | C3–C4–H4A                | 109.5      |
| C4–H4A                                   | 0.9800           | C3–C4–H4B                | 109.5      |
| C4–H4B                                   | 0.9800           | C3–C4–H4C                | 109.5      |
| C4–H4C                                   | 0.9800           | H4A–C4–H4B               | 109.5      |
| C5–H5A                                   | 0.9800           | H4A–C4–H4C               | 109.5      |
| C5–H5B                                   | 0.9800           | H4B–C4–H4C               | 109.5      |
| C5–H5C                                   | 0.9800           | C3–C5–H5A                | 109.5      |
| C6–H6A                                   | 0.9800           | C3–C5–H5B                | 109.5      |
| C6–H6B                                   | 0.9800           | C3–C5–H5C                | 109.5      |
| C6–H6C                                   | 0.9800           | H5A–C5–H5B               | 109.5      |
| C7–H7A                                   | 0.9900           | H5A–C5–H5C               | 109.5      |
| C7–H7B                                   | 0.9900           | H5B–C5–H5C               | 109.5      |
| C7–C8                                    | 1.496(4)         | C3–C6–H6A                | 109.5      |
| C8–C8 <sup>#2</sup>                      | 1.331(5)         | C3–C6–H6B                | 109.5      |
|                                          |                  | C3–C6–H6C                | 109.5      |
|                                          |                  | H6A–C6–H6B               | 109.5      |
|                                          |                  | H6A–C6–H6C               | 109.5      |
|                                          |                  | H6B–C6–H6C               | 109.5      |
| <b>Atom–Atom–Atom</b>                    | <b>Angle [°]</b> | S1–C7–H7A                | 108.3      |
| Cu1–Br1–Cu1 <sup>#1</sup>                | 74.643(14)       | S1–C7–H7B                | 108.3      |
| Br1–Cu1–Br1 <sup>#1</sup>                | 105.358(14)      | H7A–C7–H7B               | 107.4      |
| Br1–Cu1–Cu1 <sup>#1</sup>                | 53.545(11)       | C8–C7–S1                 | 116.02(18) |
| Br1 <sup>#1</sup> –Cu1–Cu1 <sup>#1</sup> | 51.813(11)       | C8–C7–H7A                | 108.3      |
| S1–Cu1–Br1 <sup>#1</sup>                 | 106.83(2)        | C8–C7–H7B                | 108.3      |
| S1–Cu1–Br1                               | 98.269(19)       | C7–C8–Br2                | 113.09(18) |
| S1–Cu1–Cu1 <sup>#1</sup>                 | 111.02(2)        | C8 <sup>#2</sup> –C8–Br2 | 118.0(3)   |
| N1–Cu1–Br1                               | 117.45(7)        | C8 <sup>#2</sup> –C8–C7  | 128.8(3)   |
| N1–Cu1–Br1 <sup>#1</sup>                 | 108.95(7)        |                          |            |
| N1–Cu1–Cu1 <sup>#1</sup>                 | 130.28(8)        |                          |            |
| N1–Cu1–S1                                | 118.67(8)        |                          |            |
| C3–S1–Cu1                                | 111.46(9)        |                          |            |
| C7–S1–Cu1                                | 98.55(9)         |                          |            |

Symmetry transformations used to generate equivalent atoms:  
#1: -X, 1-Y, 1-Z; #2: -X, 2-Y, 1-Z;

**Table S60. Torsion angles for CP9**

| Atom–Atom–Atom–Atom | Torsion Angle [°] |                           |            |
|---------------------|-------------------|---------------------------|------------|
| Cu1–S1–C3–C4        | 72.23(19)         | S1–C7–C8–C8 <sup>#1</sup> | -124.8(3)  |
| Cu1–S1–C3–C5        | -46.9(2)          | C3–S1–C7–C8               | 77.4(2)    |
| Cu1–S1–C3–C6        | -170.42(17)       | C7–S1–C3–C4               | 178.94(19) |
| Cu1–S1–C7–C8        | -166.95(16)       | C7–S1–C3–C5               | 59.9(2)    |
| S1–C7–C8–Br2        | 59.1(2)           | C7–S1–C3–C6               | -63.7(2)   |

Symmetry transformations used to generate equivalent atoms:  
#1: -X, 2-Y, 1-Z;

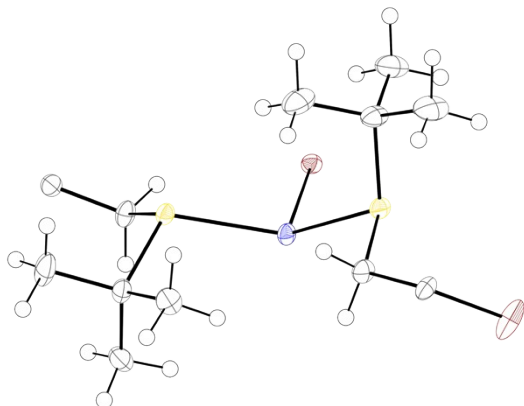

**Experimental:** The data for CP10 were collected from a shock-cooled single crystal at 100.0(1) K on a Bruker D8 VENTURE area detector four-circle diffractometer with a X-ray tube using a graphite as monochromator and a CPAD PHOTON II area detector detector. The diffractometer was equipped with an Oxford Cryostream 800 low temperature device and used Mo  $K_{\alpha}$  radiation ( $\lambda = 0.71073 \text{ \AA}$ ). All data were integrated with SAINT V8.40B and a multi-scan absorption correction using SADABS 2016/2 was applied.<sup>[1,2]</sup> The structure was solved by direct methods with XT and refined by full-matrix least-squares methods against  $F^2$  using SHELXL.<sup>[3,4]</sup> All non-hydrogen atoms were refined with anisotropic displacement parameters. The hydrogen atoms were refined isotropically on calculated positions using a riding model with their  $U_{\text{iso}}$  values constrained to 1.5 times the  $U_{\text{eq}}$  of their pivot atoms for terminal  $sp^3$  carbon atoms and 1.2 times for all other carbon atoms. Crystallographic data for the structures reported in this paper have been deposited with the Cambridge Crystallographic Data Centre.<sup>[5]</sup> CCDC 2326266 contain the supplementary crystallographic data for this paper. These data can be obtained free of charge from The Cambridge Crystallographic Data Centre via [www.ccdc.cam.ac.uk/structures](http://www.ccdc.cam.ac.uk/structures). This report and the CIF file were generated using FinalCif.<sup>[6]</sup>

|                                           |                                                                      |
|-------------------------------------------|----------------------------------------------------------------------|
| Internal Reference                        | CP10                                                                 |
| CCDC number                               | 2326266                                                              |
| Empirical formula                         | $\text{C}_{12}\text{H}_{22}\text{Br}_2\text{CuS}_2$                  |
| Formula weight                            | 453.77                                                               |
| Temperature [K]                           | 100.0(1)                                                             |
| Crystal system                            | triclinic                                                            |
| Space group (number)                      | $P\bar{1}$ (2)                                                       |
| $a$ [Å]                                   | 9.1382(11)                                                           |
| $b$ [Å]                                   | 9.9911(8)                                                            |
| $c$ [Å]                                   | 11.2700(10)                                                          |
| $\alpha$ [°]                              | 65.156(4)                                                            |
| $\beta$ [°]                               | 70.131(4)                                                            |
| $\gamma$ [°]                              | 84.401(5)                                                            |
| Volume [Å <sup>3</sup> ]                  | 876.92(15)                                                           |
| $Z$                                       | 2                                                                    |
| $\rho_{\text{calc}}$ [gcm <sup>-3</sup> ] | 1.719                                                                |
| $\mu$ [mm <sup>-1</sup> ]                 | 6.020                                                                |
| $F(000)$                                  | 450                                                                  |
| Crystal size [mm <sup>3</sup> ]           | 0.138×0.263×0.508                                                    |
| Crystal colour                            | clear light colourless                                               |
| Crystal shape                             | plate                                                                |
| Radiation                                 | Mo $K_{\alpha}$ ( $\lambda=0.71073 \text{ \AA}$ )                    |
| $2\theta$ range [°]                       | 4.22 to 55.00 (0.77 Å)                                               |
| Index ranges                              | $-11 \leq h \leq 11$<br>$-12 \leq k \leq 12$<br>$-14 \leq l \leq 14$ |
| Reflections collected                     | 33300                                                                |
| Independent reflections                   | 4027<br>$R_{\text{int}} = 0.0286$<br>$R_{\text{sigma}} = 0.0154$     |
| Completeness to $\theta = 25.242^\circ$   | 99.9 %                                                               |
| Data / Restraints / Parameters            | 4027 / 0 / 160                                                       |
| Goodness-of-fit on $F^2$                  | 1.048                                                                |
| Final $R$ indexes [ $I \geq 2\sigma(I)$ ] | $R_1 = 0.0197$<br>$wR_2 = 0.0470$                                    |
| Final $R$ indexes [all data]              | $R_1 = 0.0216$<br>$wR_2 = 0.0479$                                    |
| Largest peak/hole [eÅ <sup>-3</sup> ]     | 1.50/-0.80                                                           |

**Table S62. Bond lengths and angles for CP10**

| <b>Atom–Atom</b>                         | <b>Length [Å]</b> |                          |            |
|------------------------------------------|-------------------|--------------------------|------------|
| Br1–C6                                   | 1.9041(19)        | S2–Cu1–S1                | 127.17(2)  |
| Br2–Cu1                                  | 2.4692(4)         | C1–S1–Cu1                | 113.79(7)  |
| Br2–Cu1 <sup>#1</sup>                    | 2.5405(4)         | C5–S1–Cu1                | 102.63(6)  |
| Cu1–Cu1 <sup>#1</sup>                    | 2.8474(5)         | C5–S1–C1                 | 105.99(10) |
| Cu1–S1                                   | 2.3225(5)         | C7–S2–Cu1                | 111.40(6)  |
| Cu1–S2                                   | 2.2924(5)         | C11–S2–Cu1               | 105.48(6)  |
| S1–C1                                    | 1.850(2)          | C11–S2–C7                | 105.47(9)  |
| S1–C5                                    | 1.817(2)          | C2–C1–S1                 | 111.15(15) |
| S2–C7                                    | 1.855(2)          | C2–C1–C3                 | 110.87(19) |
| S2–C11                                   | 1.8301(19)        | C2–C1–C4                 | 110.8(2)   |
| C1–C2                                    | 1.525(3)          | C3–C1–S1                 | 103.42(15) |
| C1–C3                                    | 1.527(3)          | C3–C1–C4                 | 110.4(2)   |
| C1–C4                                    | 1.528(3)          | C4–C1–S1                 | 109.97(15) |
| C2–H2A                                   | 0.9800            | C1–C2–H2A                | 109.5      |
| C2–H2B                                   | 0.9800            | C1–C2–H2B                | 109.5      |
| C2–H2C                                   | 0.9800            | C1–C2–H2C                | 109.5      |
| C3–H3A                                   | 0.9800            | H2A–C2–H2B               | 109.5      |
| C3–H3B                                   | 0.9800            | H2A–C2–H2C               | 109.5      |
| C3–H3C                                   | 0.9800            | H2B–C2–H2C               | 109.5      |
| C4–H4A                                   | 0.9800            | C1–C3–H3A                | 109.5      |
| C4–H4B                                   | 0.9800            | C1–C3–H3B                | 109.5      |
| C4–H4C                                   | 0.9800            | C1–C3–H3C                | 109.5      |
| C5–H5A                                   | 0.9900            | H3A–C3–H3B               | 109.5      |
| C5–H5B                                   | 0.9900            | H3A–C3–H3C               | 109.5      |
| C5–C6                                    | 1.495(3)          | H3B–C3–H3C               | 109.5      |
| C6–C6 <sup>#2</sup>                      | 1.329(4)          | C1–C4–H4A                | 109.5      |
| C7–C8                                    | 1.528(3)          | C1–C4–H4B                | 109.5      |
| C7–C9                                    | 1.529(3)          | C1–C4–H4C                | 109.5      |
| C7–C10                                   | 1.521(3)          | H4A–C4–H4B               | 109.5      |
| C8–H8A                                   | 0.9800            | H4A–C4–H4C               | 109.5      |
| C8–H8B                                   | 0.9800            | H4B–C4–H4C               | 109.5      |
| C8–H8C                                   | 0.9800            | S1–C5–H5A                | 108.1      |
| C9–H9A                                   | 0.9800            | S1–C5–H5B                | 108.1      |
| C9–H9B                                   | 0.9800            | H5A–C5–H5B               | 107.3      |
| C9–H9C                                   | 0.9800            | C6–C5–S1                 | 116.85(15) |
| C10–H10A                                 | 0.9800            | C6–C5–H5A                | 108.1      |
| C10–H10B                                 | 0.9800            | C6–C5–H5B                | 108.1      |
| C10–H10C                                 | 0.9800            | C5–C6–Br1                | 113.19(14) |
| C11–H11A                                 | 0.9900            | C6 <sup>#2</sup> –C6–Br1 | 118.3(2)   |
| C11–H11B                                 | 0.9900            | C6 <sup>#2</sup> –C6–C5  | 128.3(2)   |
| C11–C12                                  | 1.466(3)          | C8–C7–S2                 | 109.55(14) |
| C12–C12 <sup>#3</sup>                    | 1.192(4)          | C8–C7–C9                 | 109.86(17) |
|                                          |                   | C9–C7–S2                 | 103.68(13) |
|                                          |                   | C10–C7–S2                | 111.46(14) |
|                                          |                   | C10–C7–C8                | 111.09(18) |
|                                          |                   | C10–C7–C9                | 110.96(17) |
|                                          |                   | C7–C8–H8A                | 109.5      |
|                                          |                   | C7–C8–H8B                | 109.5      |
|                                          |                   | C7–C8–H8C                | 109.5      |
|                                          |                   | H8A–C8–H8B               | 109.5      |
|                                          |                   | H8A–C8–H8C               | 109.5      |
|                                          |                   | H8B–C8–H8C               | 109.5      |
|                                          |                   | C7–C9–H9A                | 109.5      |
|                                          |                   | C7–C9–H9B                | 109.5      |
|                                          |                   | C7–C9–H9C                | 109.5      |
|                                          |                   |                          |            |
| <b>Atom–Atom–Atom</b>                    | <b>Angle [°]</b>  |                          |            |
| Cu1–Br2–Cu1 <sup>#1</sup>                | 69.258(12)        |                          |            |
| Br2–Cu1–Br2 <sup>#1</sup>                | 110.741(12)       |                          |            |
| Br2–Cu1–Cu1 <sup>#1</sup>                | 56.551(11)        |                          |            |
| Br2 <sup>#1</sup> –Cu1–Cu1 <sup>#1</sup> | 54.190(11)        |                          |            |
| S1–Cu1–Br2 <sup>#1</sup>                 | 93.070(15)        |                          |            |
| S1–Cu1–Br2                               | 106.402(16)       |                          |            |
| S1–Cu1–Cu1 <sup>#1</sup>                 | 107.015(17)       |                          |            |
| S2–Cu1–Br2                               | 102.124(16)       |                          |            |
| S2–Cu1–Br2 <sup>#1</sup>                 | 116.851(16)       |                          |            |
| S2–Cu1–Cu1 <sup>#1</sup>                 | 125.813(18)       |                          |            |

|               |       |                            |            |
|---------------|-------|----------------------------|------------|
| H9A–C9–H9B    | 109.5 | S2–C11–H11A                | 108.6      |
| H9A–C9–H9C    | 109.5 | S2–C11–H11B                | 108.6      |
| H9B–C9–H9C    | 109.5 | H11A–C11–H11B              | 107.6      |
| C7–C10–H10A   | 109.5 | C12–C11–S2                 | 114.54(14) |
| C7–C10–H10B   | 109.5 | C12–C11–H11A               | 108.6      |
| C7–C10–H10C   | 109.5 | C12–C11–H11B               | 108.6      |
| H10A–C10–H10B | 109.5 | C12 <sup>#3</sup> –C12–C11 | 178.0(3)   |
| H10A–C10–H10C | 109.5 |                            |            |
| H10B–C10–H10C | 109.5 |                            |            |

Symmetry transformations used to generate equivalent atoms:  
 #1: 1-X, 1-Y, 1-Z; #2: -X, 1-Y, 2-Z; #3: 1-X, 2-Y, -Z;

**Table S63. Torsion angles for CP10**

| Atom–Atom–Atom–<br>Atom   | Torsion Angle [°] |               |            |
|---------------------------|-------------------|---------------|------------|
| Cu1–S1–C1–C2              | 48.80(17)         | C1–S1–C5–C6   | –81.35(16) |
| Cu1–S1–C1–C3              | –70.22(15)        | C5–S1–C1–C2   | –63.22(17) |
| Cu1–S1–C1–C4              | 171.84(16)        | C5–S1–C1–C3   | 177.76(14) |
| Cu1–S1–C5–C6              | 159.03(13)        | C5–S1–C1–C4   | 59.8(2)    |
| Cu1–S2–C7–C8              | 169.48(13)        | C7–S2–C11–C12 | 75.42(16)  |
| Cu1–S2–C7–C9              | 52.25(14)         | C11–S2–C7–C8  | –76.57(16) |
| Cu1–S2–C7–C10             | –67.17(14)        | C11–S2–C7–C9  | 166.20(13) |
| Cu1–S2–C11–C12            | –166.58(13)       | C11–S2–C7–C10 | 46.78(16)  |
| S1–C5–C6–Br1              | –52.91(18)        |               |            |
| S1–C5–C6–C6 <sup>#1</sup> | 132.3(3)          |               |            |

Symmetry transformations used to generate equivalent atoms:  
 #1: -X, 1-Y, 2-Z;



## Crystal Data and Experimental

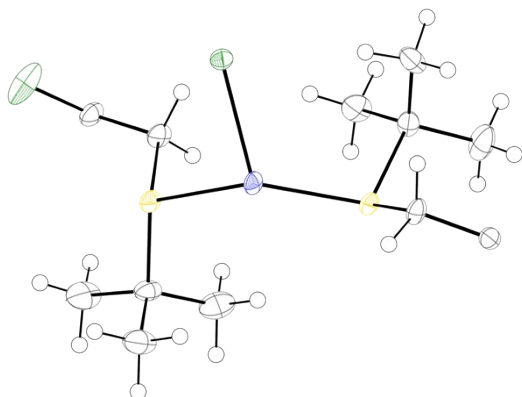

**Experimental:** The data for CP11 were collected from a shock-cooled single crystal at 115.0(1) K on a Nonius Kappa Apex II  $\lambda$ -geometry diffractometer with a X-ray tube using a graphite as monochromator and an APEX2 detector. The diffractometer was equipped with an Oxford Cryostream 600 low temperature device and used Mo  $K_{\alpha}$  radiation ( $\lambda = 0.71073$  Å). All data were integrated with SAINT V8.27B and a multi-scan absorption correction using SADABS unknown version was applied.<sup>[1,2]</sup> The structure was solved by direct methods with SHELXS-97, and refined by full-matrix least-squares methods against  $F^2$  using SHELXL.<sup>[3,4]</sup> All non-hydrogen atoms were refined with anisotropic displacement parameters. The hydrogen atoms were refined isotropically on calculated positions using a riding model with their  $U_{iso}$  values constrained to 1.5 times the  $U_{eq}$  of their pivot atoms for terminal  $sp^3$  carbon atoms and 1.2 times for all other carbon atoms. Crystallographic data for the structures reported in this paper have been deposited with the Cambridge Crystallographic Data Centre.<sup>[5]</sup> CCDC 2326267 contain the supplementary crystallographic data for this paper. These data can be obtained free of charge from The Cambridge Crystallographic Data Centre via [www.ccdc.cam.ac.uk/structures](http://www.ccdc.cam.ac.uk/structures). This report and the CIF file were generated using FinalCif.<sup>[6]</sup>

**Table S64.** Crystal data and structure refinement for CP11

|                                         |                                                    |
|-----------------------------------------|----------------------------------------------------|
| Internal Reference                      | CP11                                               |
| CCDC number                             | 2326267                                            |
| Empirical formula                       | $C_{12}H_{22}Cl_2CuS_2$                            |
| Formula weight                          | 364.85                                             |
| Temperature [K]                         | 115.0(1)                                           |
| Crystal system                          | triclinic                                          |
| Space group (number)                    | $P\bar{1}$ (2)                                     |
| $a$ [Å]                                 | 8.7545(14)                                         |
| $b$ [Å]                                 | 10.0042(15)                                        |
| $c$ [Å]                                 | 11.2498(15)                                        |
| $\alpha$ [°]                            | 64.220(6)                                          |
| $\beta$ [°]                             | 70.764(6)                                          |
| $\gamma$ [°]                            | 82.779(7)                                          |
| Volume [Å <sup>3</sup> ]                | 837.5(2)                                           |
| $Z$                                     | 2                                                  |
| $\rho_{calc}$ [gcm <sup>-3</sup> ]      | 1.447                                              |
| $\mu$ [mm <sup>-1</sup> ]               | 1.851                                              |
| $F(000)$                                | 378                                                |
| Crystal size [mm <sup>3</sup> ]         | 0.1×0.15×0.2                                       |
| Crystal colour                          | clear light colourless                             |
| Crystal shape                           | prism                                              |
| Radiation                               | Mo $K_{\alpha}$ ( $\lambda=0.71073$ Å)             |
| 2 $\theta$ range [°]                    | 6.62 to 55.35 (0.77 Å)                             |
| Index ranges                            | -11 ≤ $h$ ≤ 11<br>-13 ≤ $k$ ≤ 12<br>-14 ≤ $l$ ≤ 14 |
| Reflections collected                   | 27840                                              |
| Independent reflections                 | 3875<br>$R_{int} = 0.0413$<br>$R_{sigma} = 0.0261$ |
| Completeness to $\theta = 25.242^\circ$ | 99.8 %                                             |
| Data / Restraints / Parameters          | 3875 / 0 / 160                                     |
| Goodness-of-fit on $F^2$                | 1.063                                              |
| Final $R$ indexes [ $\geq 2\sigma(I)$ ] | $R_1 = 0.0256$<br>$wR_2 = 0.0638$                  |
| Final $R$ indexes [all data]            | $R_1 = 0.0338$<br>$wR_2 = 0.0673$                  |
| Largest peak/hole [eÅ <sup>-3</sup> ]   | 0.43/-0.74                                         |

**Table S65. Bond lengths and angles for CP11**

| <b>Atom–Atom</b>                         | <b>Length [Å]</b> |                            |             |
|------------------------------------------|-------------------|----------------------------|-------------|
| S1–Cu2                                   | 2.2767(6)         | S2–Cu2–Cu2 <sup>#1</sup>   | 106.751(18) |
| S1–C5                                    | 1.8238(19)        | S2–Cu2–Cl2 <sup>#1</sup>   | 107.65(2)   |
| S1–C4                                    | 1.856(2)          | S2–Cu2–Cl2                 | 92.521(19)  |
| Cu2–Cu2 <sup>#1</sup>                    | 2.8392(6)         | Cu2 <sup>#1</sup> –Cl2–Cu2 | 72.945(18)  |
| Cu2–Cl2 <sup>#1</sup>                    | 2.3459(6)         | C7–S2–Cu2                  | 102.55(6)   |
| Cu2–Cl2                                  | 2.4290(6)         | C7–S2–C9                   | 106.31(10)  |
| Cu2–S2                                   | 2.3096(6)         | C9–S2–Cu2                  | 112.79(7)   |
| S2–C7                                    | 1.815(2)          | S1–C5–H5A                  | 108.7       |
| S2–C9                                    | 1.852(2)          | S1–C5–H5B                  | 108.7       |
| C5–H5A                                   | 0.9900            | H5A–C5–H5B                 | 107.6       |
| C5–H5B                                   | 0.9900            | C6–C5–S1                   | 114.42(14)  |
| C5–C6                                    | 1.462(3)          | C6–C5–H5A                  | 108.7       |
| C6–C6 <sup>#2</sup>                      | 1.190(4)          | C6–C5–H5B                  | 108.7       |
| C7–H7A                                   | 0.9900            | C6 <sup>#2</sup> –C6–C5    | 178.6(3)    |
| C7–H7B                                   | 0.9900            | S2–C7–H7A                  | 108.2       |
| C7–C8                                    | 1.493(3)          | S2–C7–H7B                  | 108.2       |
| C8–C8 <sup>#3</sup>                      | 1.312(4)          | H7A–C7–H7B                 | 107.3       |
| C8–Cl1                                   | 1.751(2)          | C8–C7–S2                   | 116.37(15)  |
| C9–C12                                   | 1.520(3)          | C8–C7–H7A                  | 108.2       |
| C9–C11                                   | 1.524(3)          | C8–C7–H7B                  | 108.2       |
| C9–C10                                   | 1.515(3)          | C7–C8–Cl1                  | 113.45(15)  |
| C12–H12A                                 | 0.9800            | C8 <sup>#3</sup> –C8–C7    | 128.6(3)    |
| C12–H12B                                 | 0.9800            | C8 <sup>#3</sup> –C8–Cl1   | 117.8(2)    |
| C12–H12C                                 | 0.9800            | C12–C9–S2                  | 110.15(15)  |
| C11–H11A                                 | 0.9800            | C12–C9–C11                 | 110.6(2)    |
| C11–H11B                                 | 0.9800            | C11–C9–S2                  | 103.12(14)  |
| C11–H11C                                 | 0.9800            | C10–C9–S2                  | 111.13(15)  |
| C10–H10A                                 | 0.9800            | C10–C9–C12                 | 110.9(2)    |
| C10–H10B                                 | 0.9800            | C10–C9–C11                 | 110.70(18)  |
| C10–H10C                                 | 0.9800            | C9–C12–H12A                | 109.5       |
| C4–C3                                    | 1.518(3)          | C9–C12–H12B                | 109.5       |
| C4–C2                                    | 1.525(3)          | C9–C12–H12C                | 109.5       |
| C4–C1                                    | 1.519(3)          | H12A–C12–H12B              | 109.5       |
| C3–H3A                                   | 0.9800            | H12A–C12–H12C              | 109.5       |
| C3–H3B                                   | 0.9800            | H12B–C12–H12C              | 109.5       |
| C3–H3C                                   | 0.9800            | C9–C11–H11A                | 109.5       |
| C2–H2A                                   | 0.9800            | C9–C11–H11B                | 109.5       |
| C2–H2B                                   | 0.9800            | C9–C11–H11C                | 109.5       |
| C2–H2C                                   | 0.9800            | H11A–C11–H11B              | 109.5       |
| C1–H1A                                   | 0.9800            | H11A–C11–H11C              | 109.5       |
| C1–H1B                                   | 0.9800            | H11B–C11–H11C              | 109.5       |
| C1–H1C                                   | 0.9800            | C9–C10–H10A                | 109.5       |
|                                          |                   | C9–C10–H10B                | 109.5       |
|                                          |                   | C9–C10–H10C                | 109.5       |
|                                          |                   | H10A–C10–H10B              | 109.5       |
|                                          |                   | H10A–C10–H10C              | 109.5       |
|                                          |                   | H10B–C10–H10C              | 109.5       |
|                                          |                   | C3–C4–S1                   | 111.74(14)  |
|                                          |                   | C3–C4–C2                   | 110.55(17)  |
|                                          |                   | C3–C4–C1                   | 111.21(19)  |
|                                          |                   | C2–C4–S1                   | 103.75(14)  |
|                                          |                   | C1–C4–S1                   | 109.45(15)  |
|                                          |                   | C1–C4–C2                   | 109.89(18)  |
|                                          |                   | C4–C3–H3A                  | 109.5       |
|                                          |                   | C4–C3–H3B                  | 109.5       |
|                                          |                   |                            |             |
| <b>Atom–Atom–Atom</b>                    | <b>Angle [°]</b>  |                            |             |
| C5–S1–Cu2                                | 103.94(7)         |                            |             |
| C5–S1–C4                                 | 105.18(9)         |                            |             |
| C4–S1–Cu2                                | 110.69(7)         |                            |             |
| S1–Cu2–Cu2 <sup>#1</sup>                 | 124.538(19)       |                            |             |
| S1–Cu2–Cl2                               | 116.54(2)         |                            |             |
| S1–Cu2–Cl2 <sup>#1</sup>                 | 102.91(2)         |                            |             |
| S1–Cu2–S2                                | 128.70(2)         |                            |             |
| Cl2–Cu2–Cu2 <sup>#1</sup>                | 52.178(16)        |                            |             |
| Cl2 <sup>#1</sup> –Cu2–Cu2 <sup>#1</sup> | 54.878(15)        |                            |             |
| Cl2 <sup>#1</sup> –Cu2–Cl2               | 107.056(18)       |                            |             |

|            |       |            |       |
|------------|-------|------------|-------|
| C4–C3–H3C  | 109.5 | H2B–C2–H2C | 109.5 |
| H3A–C3–H3B | 109.5 | C4–C1–H1A  | 109.5 |
| H3A–C3–H3C | 109.5 | C4–C1–H1B  | 109.5 |
| H3B–C3–H3C | 109.5 | C4–C1–H1C  | 109.5 |
| C4–C2–H2A  | 109.5 | H1A–C1–H1B | 109.5 |
| C4–C2–H2B  | 109.5 | H1A–C1–H1C | 109.5 |
| C4–C2–H2C  | 109.5 | H1B–C1–H1C | 109.5 |
| H2A–C2–H2B | 109.5 |            |       |
| H2A–C2–H2C | 109.5 |            |       |

Symmetry transformations used to generate equivalent atoms:  
 #1: 1-X, 2-Y, 1-Z; #2: 1-X, 1-Y, 2-Z; #3: 2-X, 2-Y, -Z;

**Table S66. Torsion angles for CP11**

| Atom–Atom–Atom–<br>Atom   | Torsion Angle [°] |
|---------------------------|-------------------|
| Cu2–S1–C5–C6              | 169.16(13)        |
| Cu2–S1–C4–C3              | 64.10(15)         |
| Cu2–S1–C4–C2              | –55.02(15)        |
| Cu2–S1–C4–C1              | –172.27(14)       |
| Cu2–S2–C7–C8              | –158.68(14)       |
| Cu2–S2–C9–C12             | –172.87(17)       |
| Cu2–S2–C9–C11             | 69.08(15)         |
| Cu2–S2–C9–C10             | –49.55(17)        |
| S2–C7–C8–C8 <sup>#1</sup> | –129.9(3)         |
| S2–C7–C8–C11              | 54.12(19)         |
| C5–S1–C4–C3               | –47.57(16)        |
| C5–S1–C4–C2               | –166.69(14)       |
| C5–S1–C4–C1               | 76.06(17)         |
| C7–S2–C9–C12              | –61.2(2)          |
| C7–S2–C9–C11              | –179.29(14)       |
| C7–S2–C9–C10              | 62.08(17)         |
| C9–S2–C7–C8               | 82.72(17)         |
| C4–S1–C5–C6               | –74.45(17)        |

Symmetry transformations used to generate equivalent atoms:  
 #1: 2-X, 2-Y, -Z;



## Bibliography

### References

1. P. R. Martínez-Alanis, V. M. Ugalde-Saldívar and I. Castillo, *Eur. J. Inorg. Chem.*, 2011, **2011**, 212-220.
2. Y. Suenaga, M. Maekawa, T. Kuroda-Sowa, M. Munakata, H. Morimoto, N. Hiyama and S. Kitagawa, *Anal. Sci.*, 1997, **13**, 651-652.
3. W. Lu, Z.-M. Yan, J. Dai, Y. Zhang, Q.-Y. Zhu, D.-X. Jia and W.-J. Guo, *Eur. J. Inorg. Chem.*, 2005, DOI: 10.1002/ejic.200401002, 2339-2345.
4. B. Noren and A. Oskarsson, *Acta Chem. Scand.*, 1987, **A41**, 12-17.
5. M. Jo, J. Seo, L. F. Lindoy and S. Sung Lee, *Dalton Trans.*, 2009, DOI: 10.1039/B906474E, 6096-6098.
6. S. Y. Lee, S. Park and S. S. Lee, *Inorg. Chem.*, 2009, **48**, 11335-11341.
7. E.-J. Kang, S. Y. Lee, H. Lee and S. S. Lee, *Inorg. Chem.*, 2010, **49**, 7510-7520.
8. J. Ramos, V. M. Yartsev, S. Golhen, L. Ouahab and P. Delhaès, *J. Mater. Chem.*, 1997, **7**, 1313 - 1319.
9. H. Ryu, K.-M. Park, M. Ikeda, Y. Habata and S. S. Lee, *Inorg. Chem.*, 2014, **53**, 4029-4038.
10. M. Heller and W. S. Sheldrick, *Z. Anorg. Allg. Chem.*, 2004, **630**, 1869-1874.
11. H. W. Yim, D. Rabinovich, K.-C. Lam, J. A. Golen and A. L. Rheingold, *Acta Crystallogr. E*, 2003, **59**, m556-m558.
12. A. Bonnot, M. Knorr, C. Strohmann, C. Golz, D. Fortin and P. D. Harvey, *J. Inorg. Organomet. Polym. Mater.*, 2015, **25**, 480-494.
13. T.-H. Kim, G.-R. Park, Y.-W. Shin, K.-M. Park and J.-E. Kim, *Bull. Korean Chem. Soc.*, 2008, **29**, 499-502.
14. A. Bonnot, M. Knorr, F. Guyon, M. M. Kubicki, Y. Rousselin, C. Strohmann, D. Fortin and P. D. Harvey, *Cryst. Growth Des.*, 2016, **16**, 774-788.
15. C. R. Lucas, W. Liang, D. O. Miller and J. N. Bridson, *Inorg. Chem.*, 1997, **36**, 4508-4513.
16. T. Kokoli, S. Olsson, P. M. Björemark, S. Persson and M. Håkansson, *J. Organomet. Chem.*, 2013, **724**, 17-22.
17. L. Brammer, A. Peuronen and T. M. Roseveare, *Acta Crystallographica Section C*, 2023, **79**, 204-216.
18. S. J. Grabowski, *Molecules*, 2021, **26**, 4939.
19. R. F. W. Bader, *A Quantum Theory*, Oxford University Press, Oxford, (1990).
20. P. Popelier, *An Introduction*, Prentice Hall, Essex, (2000).
21. NBO 6.0, J. K. Badenhoop, A. E. Reed, J. E. Carpenter, J. A. Bochmann, C. M. Morales, C. R. Landis, F. Weinhold, (Theoretical Chemistry Institute, University of Wisconsin, Madison WI, 2013); <http://nbo6.chem.wisc.edu>.
22. E. Espinosa, I. Alkorta, J. Elguero and E. Molins, *J. Chem. Phys.*, 2002, **117**, 5529-5542.
23. I. Alkorta, F. Blanco and J. Elguero, *Tetrahedron Lett.*, 2008, **49**, 7246-7249.
24. C. Biswas, M. G. B. Drew, D. Escudero, A. Frontera and A. Ghosh, *Eur. J. Inorg. Chem.*, 2009, **2009**, 2238-2246.
25. C. Estarellas, A. Frontera, D. Quiñonero and P. M. Deyà, *Computational and Theoretical Chemistry*, 2011, **975**, 106-110.
26. S. Dinda and A. G. Samuelson, *Chem. Eur. J.*, 2012, **18**, 3032-3042.
27. R. Bianchi, G. Gervasio and D. Marabello, *Inorg. Chem.*, 2000, **39**, 2360-2366.
28. L. J. Farrugia and C. Evans, *Comptes Rendus Chimie*, 2005, **8**, 1566-1583.

- [1] Bruker, *SAINTE*, V8.38A, Bruker AXS Inc., Madison, Wisconsin, USA.
- [2] L. Krause, R. Herbst-Irmer, G. M. Sheldrick, D. Stalke, *J. Appl. Cryst.* **2015**, *48*, 3–10, doi:10.1107/S1600576714022985.
- [3] G. M. Sheldrick, *Acta Cryst.* **2015**, *A71*, 3–8, doi:10.1107/S2053273314026370.
- [4] G. M. Sheldrick, *Acta Cryst.* **2015**, *C71*, 3–8, doi:10.1107/S2053229614024218.
- [5] C. R. Groom, I. J. Bruno, M. P. Lightfoot, S. C. Ward, *Acta Cryst.* **2016**, *B72*, 171–179, doi:10.1107/S2052520616003954.
- [6] D. Kratzert, *FinalCif*, V136, <https://dkratzert.de/finalcif.html>.
- [7] O. D. L. CrysAlisPro, Version 1.171.33.41 (release 06-05-2009 CrysAlis171 .NET).
- [8] L. Palatinus and G. Chapuis, *J. Appl. Crystallogr.*, 2007, **40**, 786-790.
